# Supplementary material
Source: publisher figshare collection journal article supplement (https://diabetesjournals.figshare.com/ndownloader/files/31248343)
Supplement: Supplementary file 1 [file 31248343]

## Sheet: Supp_Table1a
Supplementary Table 1a: Sample characteristics for 996 Qatari individuals and replication cohort
	Discovery (N = 996)			Replication (N = 2618)
Sample Characteristics	N or Mean +/- SD	Controls	T2D	N or Mean +/- SD	Controls	T2D
T2D	-	422	574	-	2336	282
Age	50+/-12.3	43.3 +/- 11.7	54.9 +/- 10.2	38.7 +/- 12	36.9 +/- 10.9	54 +/- 8.9
Gender (Female)	450	149	301	1291	1136	155
BMI	32 +/- 6.6	30.4 +/- 6.5	33.1 +/- 6.5	28.7 +/- 5.6	28.3 +/- 5.5	31.3 +/- 5.8
Dyslipidemia	621	163	458	1603	1220	195
Lipids
TRI (mmol/L)	1.88 +/- 4.4	1.39 +/- 0.77	2.1 +/- 5.3	1.4 +/- 0.9	1.3 +/- 0.9	1.7 +/- 0.8
HDL (mmol/L)	1.22 +/- 0.35	1.3 +/- 0.37	1.18 +/- 0.34	1.3 +/- 0.36	1.3 +/- 0.3	1.2 +/- 0.3
LDL (mmol/L)	2.8 +/- 0.91	3.16 +/- 0.85	2.65 +/- 0.89	2.9 +/- 0.8	3 +/- 0.85	2.8 +/- 0.9
Retinopathy	126	0	126	NA	NA	NA
No-Retinopathy	384	271	113	NA	NA	NA

## Sheet: Supp_Table1b
Supplementary Table 1b : Metabolite Information as reported by Metabolon.
Metabolites that passed QC are indicated in column N. Metabolites that overlapwith the replication cohort are indicated in column P. CV is computed based on raw data.
Metabolite	SUPER_PATHWAY	SUB_PATHWAY	COMP_ID	PLATFORM	CHEMICAL_ID	RI	MASS	CAS	PUBCHEM	CHEMSPIDER	KEGG_LINK	HMBD_LINK	Passed QC (less than 20% missing values)	CV	found in replication cohort
alanine	Amino Acid	Alanine and Aspartate Metabolism	1126	LC/MS Neg	811	682	88.0404	56-41-7	5950	5735	C00041	HMDB00161	yes	26.4457	Yes
asparagine	Amino Acid	Alanine and Aspartate Metabolism	512	LC/MS Pos Early	917	1225	133.061	70-47-3	6267	6031	C00152	HMDB00168	yes	27.0851	Yes
aspartate	Amino Acid	Alanine and Aspartate Metabolism	443	LC/MS Pos Early	234	1165	134.045	56-84-8	5960	5745	C00049	HMDB00191	yes	59.7212	Yes
N-acetylalanine	Amino Acid	Alanine and Aspartate Metabolism	1585	LC/MS Neg	1110	861.2	130.051	97-69-8	88064	79449	C02847	HMDB00766	yes	42.0894	Yes
N-acetylasparagine	Amino Acid	Alanine and Aspartate Metabolism	33942	LC/MS Pos Early	100001257	785	175.071	4033-40-3	99715	90090		HMDB06028	yes	47.2127	Yes
N-acetylaspartate (NAA)	Amino Acid	Alanine and Aspartate Metabolism	22185	LC/MS Neg	100000787	620.5	174.041	997-55-7;997-55-7	65065	58576	C01042	HMDB00812	yes	31.3948	Yes
N-carbamoylalanine	Amino Acid	Alanine and Aspartate Metabolism	52340	LC/MS Pos Early	100006369	1005	133.061	77340-50-2	426409	377278			yes	184.141	Yes
creatine	Amino Acid	Creatine Metabolism	27718	LC/MS Neg	1221	763	130.062	57-00-1	586	566	C00300	HMDB00064	yes	60.4059	Yes
creatinine	Amino Acid	Creatine Metabolism	513	LC/MS Neg	275	1071.8	112.052	60-27-5	588	568	C00791	HMDB00562	yes	74.796	Yes
guanidinoacetate	Amino Acid	Creatine Metabolism	43802	LC/MS Polar	344	2884	116.047	352-97-6	763	743	C00581	HMDB00128	yes	46.1939	Yes
4-hydroxyglutamate	Amino Acid	Glutamate Metabolism	40499	LC/MS Pos Early	100002544	1141	164.055	2485-33-8	439902	388936	C03079	HMDB01344	no	73.6008	Yes
gamma-carboxyglutamate	Amino Acid	Glutamate Metabolism	38754	LC/MS Pos Early	100002679	903	192.05	56271-99-9	40772	37241		HMDB41900	yes	211.256	Yes
glutamate	Amino Acid	Glutamate Metabolism	57	LC/MS Pos Early	561	1500	148.06	56-86-0	611	591	C00025	HMDB00148	yes	57.8107	Yes
glutamine	Amino Acid	Glutamate Metabolism	53	LC/MS Pos Early	563	1291	147.076	56-85-9	5961	5746	C00064	HMDB00641	yes	21.6411	Yes
N-acetyl-aspartyl-glutamate (NAAG)	Amino Acid	Glutamate Metabolism	35665	LC/MS Pos Early	100001612	1035	305.098	3106-85-2	5255	5065	C12270	HMDB01067	no	67.2219	Yes
N-acetylglutamate	Amino Acid	Glutamate Metabolism	15720	LC/MS Polar	100000282	3106	188.056	5817-08-3	70914	1266066	C00624	HMDB01138	yes	55.1349	Yes
N-acetylglutamine	Amino Acid	Glutamate Metabolism	33943	LC/MS Neg	100001253	771	187.072	2490-97-3	182230	158492	C02716	HMDB06029	yes	66.6515	No
pyroglutamine*	Amino Acid	Glutamate Metabolism	46225	LC/MS Polar	100001540	3153	127.051	2353-44-8	134508	118562			yes	82.6409	Yes
S-1-pyrroline-5-carboxylate	Amino Acid	Glutamate Metabolism	42370	LC/MS Pos Early	35	1528	114.055	2906-39-0	1196	10140206	C04322	HMDB01301	yes	57.0947	Yes
5-oxoproline	Amino Acid	Glutathione Metabolism	1494	LC/MS Neg	1021	738.5	128.035	98-79-3	7405	7127	C01879	HMDB00267	yes	81.2599	Yes
cys-gly, oxidized	Amino Acid	Glutathione Metabolism	18368	LC/MS Neg	1224	925	353.06	7729-20-6	333293	295316			yes	63.3686	Yes
cysteine-glutathione disulfide	Amino Acid	Glutathione Metabolism	35159	LC/MS Pos Early	100001437	2465	427.095	13081-14-6	4247235	3455404		HMDB00656	yes	117.545	Yes
cysteinylglycine	Amino Acid	Glutathione Metabolism	35637	LC/MS Pos Early	278	2132	179.048	19246-18-5	439498	58762	C01419	HMDB00078	no	70.605	Yes
glutathione, oxidized (GSSG)	Amino Acid	Glutathione Metabolism	38783	LC/MS Pos Early	448	2667	307.083	103239-24-3	65359	58835	C00127	HMDB03337	no	0	No
glutathione, reduced (GSH)	Amino Acid	Glutathione Metabolism	2127	LC/MS Neg	496	790	306.077	70-18-8	124886	111188	C00051	HMDB00125	no	#DIV/0!	No
2-methylserine	Amino Acid	Glycine, Serine and Threonine Metabolism	53229	LC/MS Pos Early	100009246	1652	120.066		94309	85112			yes	70.6329	No
betaine	Amino Acid	Glycine, Serine and Threonine Metabolism	3141	LC/MS Pos Early	799	1064	118.086	107-43-7	247	24219951173	C00719	HMDB00043	yes	30.8586	Yes
dimethylglycine	Amino Acid	Glycine, Serine and Threonine Metabolism	5086	LC/MS Pos Early	806	1104	104.071	1118-68-9	673	653	C01026	HMDB00092	yes	48.6862	Yes
glycine	Amino Acid	Glycine, Serine and Threonine Metabolism	58	LC/MS Pos Early	340	1375	76.0393	56-40-6	750	730	C00037	HMDB00123	yes	32.9729	Yes
N-acetylglycine	Amino Acid	Glycine, Serine and Threonine Metabolism	27710	LC/MS Neg	100001006	731	116.035	543-24-8	10972	10507		HMDB00532	yes	57.0381	Yes
N-acetylserine	Amino Acid	Glycine, Serine and Threonine Metabolism	37076	LC/MS Pos Early	100001851	811	148.06	97-14-3	65249	58744		HMDB02931	yes	56.7662	Yes
N-acetylthreonine	Amino Acid	Glycine, Serine and Threonine Metabolism	33939	LC/MS Neg	100001274	821.6	160.062	17093-74-2	152204	3841173			yes	62.9352	Yes
sarcosine (N-Methylglycine)	Amino Acid	Glycine, Serine and Threonine Metabolism	1516	LC/MS Pos Early	1023	1280	90.055	107-97-1	1088	1057	C00213	HMDB00271	yes	48.2283	No
serine	Amino Acid	Glycine, Serine and Threonine Metabolism	1648	LC/MS Pos Early	503	1239	106.05	56-45-1	5951	5736	C00065	HMDB00187	yes	26.8585	Yes
threonine	Amino Acid	Glycine, Serine and Threonine Metabolism	1284	LC/MS Pos Early	564	1514	120.066	72-19-5	6288	6051	C00188	HMDB00167	yes	32.4183	Yes
1-methylguanidine	Amino Acid	Guanidino and Acetamido Metabolism	48114	LC/MS Pos Early	100000715	2149	74.0713	22661-87-6	10111	28576	C02294	HMDB01522	no	249.339	Yes
4-guanidinobutanoate	Amino Acid	Guanidino and Acetamido Metabolism	15681	LC/MS Pos Early	100000096	2320	146.092	463-003;463-00-3	500	486	C01035	HMDB03464	yes	77.2837	Yes
guanidinosuccinate	Amino Acid	Guanidino and Acetamido Metabolism	32446	LC/MS Polar	100001212	3550	174.052	6133-30-8	97856	88329	C03139	HMDB03157	no	315.611	No
1-methylhistidine	Amino Acid	Histidine Metabolism	30460	LC/MS Pos Early	100001051	2755	170.092	332-80-9	92105	83153	C01152	HMDB00001	yes	60.491	Yes
1-methylimidazoleacetate	Amino Acid	Histidine Metabolism	32350	LC/MS Pos Early	100001208	2064	141.066	2625-49-2	75810	68319	C05828	HMDB02820	yes	153.888	No
3-methylhistidine	Amino Acid	Histidine Metabolism	15677	LC/MS Neg	100000042	906.3	168.078	368-16-1	64969	58494	C01152	HMDB00479	yes	104.262	Yes
4-imidazoleacetate	Amino Acid	Histidine Metabolism	32349	LC/MS Pos Early	100001207	2055	127.05	645-65-8	96215	86856	C02835	HMDB02024	yes	56.6628	Yes
cis-urocanate	Amino Acid	Histidine Metabolism	40410	LC/MS Pos Early	100003425	2406	139.05	7699-35-6	1549103	1266070			no	247.772	No
histidine	Amino Acid	Histidine Metabolism	59	LC/MS Pos Early	355	2707	156.077	5934-29-2	6274	752	C00135	HMDB00177	yes	20.6099	Yes
hydantoin-5-propionic acid	Amino Acid	Histidine Metabolism	40473	LC/MS Polar	100002514	2080	171.041	5624-26-0	782	761	C05565	HMDB01212	yes	180.145	No
imidazole lactate	Amino Acid	Histidine Metabolism	15716	LC/MS Pos Early	100000263	2040	157.061	14403-45-3	440129	389128	C05568	HMDB02320	yes	46.8175	Yes
imidazole propionate	Amino Acid	Histidine Metabolism	40730	LC/MS Pos Early	100003434	2263	141.066	1074-59-5	70630	63798		HMDB02271	no	184.216	Yes
N-acetyl-1-methylhistidine*	Amino Acid	Histidine Metabolism	43255	LC/MS Pos Early	100004299	2100	212.103						no	253.649	Yes
N-acetyl-3-methylhistidine*	Amino Acid	Histidine Metabolism	43256	LC/MS Neg	100002204	1360	210.088	37841-04-6	193270	19993498			no	270.927	No
N-acetylhistamine	Amino Acid	Histidine Metabolism	48679	LC/MS Pos Early	100006123	2287	154.097	673-49-4	69602	62805	C05135	HMDB13253	no	123.566	No
N-acetylhistidine	Amino Acid	Histidine Metabolism	33946	LC/MS Neg	100001293	900	196.073	39145-52-3	75619	68142	C02997	HMDB32055	yes	82.3607	Yes
phenylacetylhistidine	Amino Acid	Histidine Metabolism	52926	LC/MS Pos Early	100009044	2909	274.119						no	196.456	No
trans-urocanate	Amino Acid	Histidine Metabolism	607	LC/MS Pos Early	537	2285	139.05	104-98-3	736715	643824	C00785	HMDB00301	yes	837.324	Yes
2-hydroxy-3-methylvalerate	Amino Acid	Leucine, Isoleucine and Valine Metabolism	36746	LC/MS Neg	100001541	1800	131.071	488-15-3	164623	144317		HMDB00317	yes	93.3703	Yes
2-methylbutyrylcarnitine (C5)	Amino Acid	Leucine, Isoleucine and Valine Metabolism	45095	LC/MS Pos Early	100001509	3035	246.17	31023-25-3	6426901	4932320		HMDB00378	yes	53.7811	Yes
3-hydroxy-2-ethylpropionate	Amino Acid	Leucine, Isoleucine and Valine Metabolism	32397	LC/MS Neg	100001170	975	117.056	4374-62-3	188979	164207		HMDB00396	yes	43.5704	Yes
3-hydroxyisobutyrate	Amino Acid	Leucine, Isoleucine and Valine Metabolism	1549	LC/MS Polar	111	1619.1	103.04	2068-83-9	87	10140307	C06001	HMDB00336	yes	53.5924	Yes
3-methyl-2-oxobutyrate	Amino Acid	Leucine, Isoleucine and Valine Metabolism	44526	LC/MS Neg	100000936	1465	115.04	3715-29-5	49	48	C00141	HMDB00019	yes	65.2282	Yes
3-methyl-2-oxovalerate	Amino Acid	Leucine, Isoleucine and Valine Metabolism	15676	LC/MS Neg	100000036	2064.2	129.056	1460-34-0;51829-07-3	47	46	C00671	HMDB03736	yes	44.7759	Yes
3-methylcrotonylglycine	Amino Acid	Leucine, Isoleucine and Valine Metabolism	31940	LC/MS Pos Early	100001149	1980	158.081	33008-07-0	169485	148224		HMDB00459	no	129.95	No
3-methylglutaconate	Amino Acid	Leucine, Isoleucine and Valine Metabolism	38667	LC/MS Polar	100002458	2579.6	143.035	5746-90-7	1551553	1267861		HMDB00522	yes	114.122	Yes
4-methyl-2-oxopentanoate	Amino Acid	Leucine, Isoleucine and Valine Metabolism	22116	LC/MS Neg	100000551	2170	129.056	816-66-0	70	69	C00233	HMDB00695	yes	48.9178	Yes
alpha-hydroxyisocaproate	Amino Acid	Leucine, Isoleucine and Valine Metabolism	22132	LC/MS Neg	100000706	1840	131.071	10303-64-7	83697	75520	C03264	HMDB00746	yes	64.4098	Yes
alpha-hydroxyisovalerate	Amino Acid	Leucine, Isoleucine and Valine Metabolism	33937	LC/MS Neg	100001300	1126	117.056	600-37-3	99823	90190		HMDB00407	yes	102.758	Yes
beta-hydroxyisovalerate	Amino Acid	Leucine, Isoleucine and Valine Metabolism	12129	LC/MS Neg	1442	1027	117.056	625-08-1	69362	62571		HMDB00754	yes	43.9613	Yes
ethylmalonate	Amino Acid	Leucine, Isoleucine and Valine Metabolism	15765	LC/MS Polar	2054	2785	131.035	601-75-2	11756	11263		HMDB00622	yes	85.3652	Yes
isobutyrylcarnitine	Amino Acid	Leucine, Isoleucine and Valine Metabolism	33441	LC/MS Pos Early	100001055	2810	232.154	25518-49-4	168379			HMDB00736	yes	87.6068	No
isobutyrylglycine	Amino Acid	Leucine, Isoleucine and Valine Metabolism	35437	LC/MS Neg	100001590	1420	144.067	15926-18-8	10855600	9030891		HMDB00730	yes	89.9857	Yes
isoleucine	Amino Acid	Leucine, Isoleucine and Valine Metabolism	1125	LC/MS Pos Early	376	2800	132.102	73-32-5	6306	769	C00407	HMDB00172	yes	31.972	Yes
isovalerate	Amino Acid	Leucine, Isoleucine and Valine Metabolism	44656	LC/MS Neg	100000708	1564	101.061	503-74-2	10430	10001	C08262	HMDB00718	yes	46.4803	No
isovalerylcarnitine	Amino Acid	Leucine, Isoleucine and Valine Metabolism	34407	LC/MS Pos Early	100001393	3085	246.17	31023-24-2	6426851	4932271		HMDB00688	yes	50.2763	No
isovalerylglycine	Amino Acid	Leucine, Isoleucine and Valine Metabolism	35107	LC/MS Neg	100001452	1950	158.082	16284-60-9	546304	475516		HMDB00678	yes	62.5788	Yes
leucine	Amino Acid	Leucine, Isoleucine and Valine Metabolism	60	LC/MS Pos Early	397	2864	132.102	61-90-5	6106	5880	C00123	HMDB00687	yes	30.9185	Yes
methylsuccinate	Amino Acid	Leucine, Isoleucine and Valine Metabolism	15745	LC/MS Polar	2051	2800	131.035	498-21-5	10349	9922		HMDB01844	yes	67.7079	Yes
methylsuccinoylcarnitine (1)	Amino Acid	Leucine, Isoleucine and Valine Metabolism	53031	LC/MS Pos Early	100009275	2589	276.144						no	305.356	No
N-acetylisoleucine	Amino Acid	Leucine, Isoleucine and Valine Metabolism	33967	LC/MS Neg	100001276	2325	172.098	3077-46-1	2802421	2081100			yes	40.3408	Yes
N-acetylleucine	Amino Acid	Leucine, Isoleucine and Valine Metabolism	1587	LC/MS Neg	1082	2400	172.098	1188-21-2	70912	64075	C02710	HMDB11756	yes	47.4314	Yes
N-acetylvaline	Amino Acid	Leucine, Isoleucine and Valine Metabolism	1591	LC/MS Neg	1084	1704	158.082	96-81-1	66789	60154		HMDB11757	yes	39.3566	Yes
tigloylglycine	Amino Acid	Leucine, Isoleucine and Valine Metabolism	1598	LC/MS Pos Early	1161	1926	158.081	35842-45-6	6441567	4945715		HMDB00959	no	166.343	No
tiglylcarnitine	Amino Acid	Leucine, Isoleucine and Valine Metabolism	35428	LC/MS Pos Early	100001597	2962	244.154	64191-86-2	22833596	17216200		HMDB02366	yes	52.8511	No
valine	Amino Acid	Leucine, Isoleucine and Valine Metabolism	1649	LC/MS Pos Early	566	2479	118.086	72-18-4	6287	6050	C00183	HMDB00883	yes	25.4301	Yes
2-aminoadipate	Amino Acid	Lysine Metabolism	6146	LC/MS Neg	381	639.2	160.062	542-32-5;1118-90-7	469	456	C00956	HMDB00510	yes	72.3794	Yes
3-methylglutarylcarnitine (2)	Amino Acid	Lysine Metabolism	46548	LC/MS Pos Early	100005850	2675	290.16		128145	113619		HMDB00552	no	282.973	Yes
5-hydroxylysine	Amino Acid	Lysine Metabolism	15685	LC/MS Pos Early	100000054	2790	163.108	13204-98-3	1029	1002	C16741	HMDB00450	yes	100.032	Yes
6-oxopiperidine-2-carboxylic acid	Amino Acid	Lysine Metabolism	43231	LC/MS Neg	100004499	964.5	142.051	34622-39-4	3014237	2282737			yes	60.4784	No
glutarate (pentanedioate)	Amino Acid	Lysine Metabolism	396	LC/MS Polar	339	2900	131.035	110-94-1	743	3618533	C00489	HMDB00661	yes	85.2684	No
glutarylcarnitine (C5)	Amino Acid	Lysine Metabolism	44664	LC/MS Pos Early	100001593	2393	276.144	102636-82-8	71464488	21403175		HMDB13130	yes	97.6965	No
lysine	Amino Acid	Lysine Metabolism	1301	LC/MS Pos Early	407	2850	147.113	56-87-1	5962	5747	C00047	HMDB00182	yes	24.1616	Yes
N2-acetyllysine	Amino Acid	Lysine Metabolism	36751	LC/MS Polar	100001721	3372.6	187.109	1946-82-3	92907	83869	C12989	HMDB00446	no	85.2484	Yes
N6,N6,N6-trimethyllysine	Amino Acid	Lysine Metabolism	1498	LC/MS Pos Early	189	2825	189.16	23284-33-5	440120	140379	C03793	HMDB01325	yes	69.8074	Yes
N6-acetyllysine	Amino Acid	Lysine Metabolism	36752	LC/MS Neg	100001734	1059	187.109	692-04-6	92832	83801	C02727	HMDB00206	yes	37.7789	Yes
pipecolate	Amino Acid	Lysine Metabolism	1444	LC/MS Neg	1025	1050	128.072	4043-87-2	849	826	C00408	HMDB00070	yes	105.275	Yes
2-aminobutyrate	Amino Acid	Methionine, Cysteine, SAM and Taurine Metabolism	42374	LC/MS Pos Early	1128	2059	104.071	1492-24-6	439691	388757	C02261	HMDB00650	yes	38.6996	Yes
2-hydroxybutyrate/2-hydroxyisobutyrate	Amino Acid	Methionine, Cysteine, SAM and Taurine Metabolism	52281	LC/MS Polar	100008928	1258	103.04						yes	59.9469	Yes
alpha-ketobutyrate	Amino Acid	Methionine, Cysteine, SAM and Taurine Metabolism	4968	LC/MS Neg	796	949.2	101.024	600-18-0	58	2829426	C00109	HMDB00005	no	148.418	Yes
cystathionine	Amino Acid	Methionine, Cysteine, SAM and Taurine Metabolism	15705	LC/MS Pos Early	310	2270	223.075	535-34-2	439258	811	C02291	HMDB00099	yes	173.157	Yes
cysteine	Amino Acid	Methionine, Cysteine, SAM and Taurine Metabolism	1868	LC/MS Pos Early	800	1488	122.027	52-90-4;56-89-3	5862	5653	C00097	HMDB00574	yes	58.1765	Yes
cysteine s-sulfate	Amino Acid	Methionine, Cysteine, SAM and Taurine Metabolism	22176	LC/MS Polar	100000808	2273	199.969	1637-71-4	115015	102939	C05824	HMDB00731	yes	66.7983	Yes
cysteine sulfinic acid	Amino Acid	Methionine, Cysteine, SAM and Taurine Metabolism	37443	LC/MS Pos Early	100002113	597	154.017	207121-48-0	109	107	C00606	HMDB00996	yes	56.0627	Yes
cystine	Amino Acid	Methionine, Cysteine, SAM and Taurine Metabolism	56	LC/MS Pos Early	279	2000	241.031	56-89-3	67678	575	C00491	HMDB00192	yes	72.4066	Yes
hypotaurine	Amino Acid	Methionine, Cysteine, SAM and Taurine Metabolism	590	LC/MS Pos Early	358	724	110.027	300-84-5	107812	96959	C00519	HMDB00965	yes	58.9037	No
methionine	Amino Acid	Methionine, Cysteine, SAM and Taurine Metabolism	1302	LC/MS Pos Early	415	2526	150.058	63-68-3	6137	5907	C00073	HMDB00696	yes	32.8299	Yes
methionine sulfone	Amino Acid	Methionine, Cysteine, SAM and Taurine Metabolism	44878	LC/MS Pos Early	100004635	1250	182.048	820-10-0	69961	63154			yes	67.7116	Yes
methionine sulfoxide	Amino Acid	Methionine, Cysteine, SAM and Taurine Metabolism	18374	LC/MS Pos Early	100000039	1272	166.053	3226-65-1	158980	139840	C02989	HMDB02005	yes	43.273	Yes
N-acetylmethionine	Amino Acid	Methionine, Cysteine, SAM and Taurine Metabolism	1589	LC/MS Neg	1083	1787	190.054	65-82-7	448580	395338	C02712	HMDB11745	yes	87.1861	Yes
N-acetyltaurine	Amino Acid	Methionine, Cysteine, SAM and Taurine Metabolism	48187	LC/MS Neg	100005466	800	166.018		159864	140553			yes	60.6184	Yes
N-formylmethionine	Amino Acid	Methionine, Cysteine, SAM and Taurine Metabolism	2829	LC/MS Neg	194	1543.8	176.039	4289-98-9	439750	388809	C03145	HMDB01015	yes	42.7638	Yes
N-methyltaurine	Amino Acid	Methionine, Cysteine, SAM and Taurine Metabolism	42989	LC/MS Neg	100004056	704	138.023	107-68-6	6994586;7882	7594			no	190.624	No
S-adenosylhomocysteine (SAH)	Amino Acid	Methionine, Cysteine, SAM and Taurine Metabolism	42382	LC/MS Neg	197	1832.4	383.114	979-92-0	439155	16788012	C00021	HMDB00939	yes	88.8464	Yes
S-methylcysteine	Amino Acid	Methionine, Cysteine, SAM and Taurine Metabolism	39592	LC/MS Neg	100002749	880	134.028	1187-84-4	24417	22826		HMDB02108	yes	43.6314	Yes
S-methylmethionine	Amino Acid	Methionine, Cysteine, SAM and Taurine Metabolism	38127	LC/MS Pos Early	100002183	2584	164.074	3493-12-7	458	8351775	C05319		no	125.916	No
taurine	Amino Acid	Methionine, Cysteine, SAM and Taurine Metabolism	2125	LC/MS Neg	512	690	124.007	107-35-7	1123	1091	C00245	HMDB00251	yes	43.2123	Yes
2-hydroxyphenylacetate	Amino Acid	Phenylalanine and Tyrosine Metabolism	1432	LC/MS Polar	235	858.6	151.04	614-75-5	11970	11476	C05852	HMDB00669	yes	102.851	Yes
2-hydroxyphenylacetate sulfate	Amino Acid	Phenylalanine and Tyrosine Metabolism	52922	LC/MS Neg	100006635	830	230.997						no	789.971	No
3-(3-hydroxyphenyl)propionate	Amino Acid	Phenylalanine and Tyrosine Metabolism	35635	LC/MS Neg	100001624	1980	165.056	621-54-5	91	89	C11457	HMDB00375	no	141.538	Yes
3-(3-hydroxyphenyl)propionate sulfate	Amino Acid	Phenylalanine and Tyrosine Metabolism	45415	LC/MS Neg	100005391	1294	245.013	86321-32-6	187488	162993			no	270.061	Yes
3-(4-hydroxyphenyl)lactate	Amino Acid	Phenylalanine and Tyrosine Metabolism	32197	LC/MS Neg	240	1379	181.051	6482-98-0	9378	9010	C03672	HMDB00755	yes	43.47	Yes
3-(4-hydroxyphenyl)propionate	Amino Acid	Phenylalanine and Tyrosine Metabolism	39587	LC/MS Neg	100002914	1670	165.056	501-97-3	10394	9965	C01744	HMDB02199	no	180.128	No
3,4-dihydroxyphenylacetate sulfate	Amino Acid	Phenylalanine and Tyrosine Metabolism	48736	LC/MS Neg	100006254	800	246.992	38339-04-7	193283	167724			no	358.477	No
3-hydroxyphenylacetate sulfate	Amino Acid	Phenylalanine and Tyrosine Metabolism	52921	LC/MS Neg	100006634	969	230.997						no	402.548	No
3-methoxytyramine sulfate	Amino Acid	Phenylalanine and Tyrosine Metabolism	44618	LC/MS Neg	100004634	1722	246.044			21233674			no	334.98	No
3-methoxytyrosine	Amino Acid	Phenylalanine and Tyrosine Metabolism	12017	LC/MS Pos Early	1342	2555	212.092	300-48-1	1670	8948		HMDB01434	yes	481.733	Yes
3-phenylpropionate (hydrocinnamate)	Amino Acid	Phenylalanine and Tyrosine Metabolism	15749	LC/MS Neg	100000010	2860	149.061	501-52-0	107	10181339	C05629	HMDB00764	yes	107.082	Yes
4-hydroxycinnamate sulfate	Amino Acid	Phenylalanine and Tyrosine Metabolism	48410	LC/MS Neg	100006095	1000	242.997	376374-66-2	6070438	4797737			no	152.401	No
4-hydroxyphenylacetate	Amino Acid	Phenylalanine and Tyrosine Metabolism	541	LC/MS Neg	144	1361.1	151.04	156-38-7	127	3881560	C00642	HMDB00020	yes	141.618	Yes
4-hydroxyphenylacetatoylcarnitine	Amino Acid	Phenylalanine and Tyrosine Metabolism	52932	LC/MS Pos Early	100006619	2730	296.149						no	50.2894	No
4-hydroxyphenylpyruvate	Amino Acid	Phenylalanine and Tyrosine Metabolism	1669	LC/MS Neg	1141	1690.1	179.035	156-39-8	979	954	C01179	HMDB00707	yes	56.2692	No
5-bromotryptophan	Amino Acid	Phenylalanine and Tyrosine Metabolism	53242	LC/MS Neg	100009338	3525	280.993		96735	87339			yes	42.3296	No
5-hydroxymethyl-2-furoic acid	Amino Acid	Phenylalanine and Tyrosine Metabolism	42040	LC/MS Neg	100003954	962	141.019	6338-41-6	80642	72827	C20448	HMDB02432	no	213.218	No
catechol glucuronide	Amino Acid	Phenylalanine and Tyrosine Metabolism	53243	LC/MS Neg	100009326	1742	285.062						no	182.654	No
dopamine sulfate (1)	Amino Acid	Phenylalanine and Tyrosine Metabolism	48406	LC/MS Neg	100006360	1511	232.028						no	176.406	No
dopamine sulfate (2)	Amino Acid	Phenylalanine and Tyrosine Metabolism	48407	LC/MS Neg	100006361	1556.2	232.028						yes	150.663	No
gentisate	Amino Acid	Phenylalanine and Tyrosine Metabolism	18280	LC/MS Polar	100000447	905	153.019	490-79-9	3469	3350	C00628	HMDB00152	no	199.311	No
homovanillate (HVA)	Amino Acid	Phenylalanine and Tyrosine Metabolism	1101	LC/MS Neg	117	1649	181.051	306-08-1	1738	5323114	C05582	HMDB00118	no	119.403	Yes
homovanillate sulfate	Amino Acid	Phenylalanine and Tyrosine Metabolism	38349	LC/MS Neg	100002250	1047	261.007	38339-06-9	29981063	21896746		HMDB11719	no	516.114	No
N-acetylphenylalanine	Amino Acid	Phenylalanine and Tyrosine Metabolism	33950	LC/MS Neg	100001256	2597	206.082	2018-61-3	74839	67404	C03519	HMDB00512	yes	59.9453	Yes
N-acetyltyrosine	Amino Acid	Phenylalanine and Tyrosine Metabolism	32390	LC/MS Neg	100001104	1680	222.077	537-55-3	68310	61606		HMDB00866	yes	55.2383	Yes
N-formylphenylalanine	Amino Acid	Phenylalanine and Tyrosine Metabolism	48433	LC/MS Neg	100006056	2336	192.067	13200-85-6	759256	663938			yes	70.1942	Yes
o-cresol sulfate	Amino Acid	Phenylalanine and Tyrosine Metabolism	36845	LC/MS Neg	100001806	2796	187.007		11615528	9790277			yes	116.266	No
p-cresol sulfate	Amino Acid	Phenylalanine and Tyrosine Metabolism	36103	LC/MS Neg	100001315	2890	187.007	3233-57-7	4615423	3806480	C01468	HMDB11635	yes	119.36	Yes
p-cresol-glucuronide*	Amino Acid	Phenylalanine and Tyrosine Metabolism	48841	LC/MS Neg	100006191	2420	283.082	17680-99-8	154035	135751		HMDB11686	yes	444.477	No
phenol sulfate	Amino Acid	Phenylalanine and Tyrosine Metabolism	32553	LC/MS Neg	100001510	2156	172.991	937-34-8	74426	67018	C02180	HMDB60015	yes	118.767	Yes
phenylacetate	Amino Acid	Phenylalanine and Tyrosine Metabolism	15958	LC/MS Neg	100000011	2150	135.045	103-82-2	999	10181341	C07086	HMDB00209	no	85.2142	Yes
phenylacetylglutamate	Amino Acid	Phenylalanine and Tyrosine Metabolism	52925	LC/MS Neg	100009045	1630	264.088		11579826	9754592		HMDB59772	no	550.799	Yes
phenylacetylglutamine	Amino Acid	Phenylalanine and Tyrosine Metabolism	35126	LC/MS Neg	100001417	2330	263.104	28047-15-6	92258	270643	C04148	HMDB06344	yes	210.501	Yes
phenylacetylglycine	Amino Acid	Phenylalanine and Tyrosine Metabolism	33945	LC/MS Neg	100001275	2375	192.067	500-98-1	68144	61452	C05598	HMDB00821	no	150.926	No
phenylalanine	Amino Acid	Phenylalanine and Tyrosine Metabolism	64	LC/MS Pos Early	460	2878	166.086	63-91-2	6140	5910	C00079	HMDB00159	yes	27.7418	Yes
phenyllactate (PLA)	Amino Acid	Phenylalanine and Tyrosine Metabolism	22130	LC/MS Neg	100000774	2208	165.056	828-01-3	3848	3715	C05607	HMDB00779	yes	93.3151	Yes
phenylpyruvate	Amino Acid	Phenylalanine and Tyrosine Metabolism	566	LC/MS Neg	241	2517.6	163.04	156-06-9	997	972	C00166	HMDB00205	yes	47.0326	Yes
thyroxine	Amino Acid	Phenylalanine and Tyrosine Metabolism	2761	LC/MS Neg	1094	4808	775.679	51-48-9	5819	5614	C01829	HMDB01918	yes	28.7265	Yes
tyramine O-sulfate	Amino Acid	Phenylalanine and Tyrosine Metabolism	48408	LC/MS Neg	100006092	1565	216.034	30223-92-8	153005	134849		HMDB06409	yes	250.601	Yes
tyrosine	Amino Acid	Phenylalanine and Tyrosine Metabolism	1299	LC/MS Pos Early	815	2430	182.081	60-18-4	6057	5833	C00082	HMDB00158	yes	26.5176	Yes
vanillic alcohol sulfate	Amino Acid	Phenylalanine and Tyrosine Metabolism	48733	LC/MS Neg	100006125	1808	233.013	754920-02-0					no	283.941	No
vanillylmandelate (VMA)	Amino Acid	Phenylalanine and Tyrosine Metabolism	1567	LC/MS Neg	1111	941	197.046	55-10-7	1245	1207	C05584	HMDB00291	yes	92.3544	Yes
4-acetamidobutanoate	Amino Acid	Polyamine Metabolism	1558	LC/MS Neg	1113	893.7	144.067	3025-96-5	18189	17180	C02946	HMDB03681	yes	251.342	Yes
5-methylthioadenosine (MTA)	Amino Acid	Polyamine Metabolism	1419	LC/MS Pos Early	212	2752	298.097	2457-80-9	439176	388321	C00170	HMDB01173	yes	67.5802	Yes
acisoga	Amino Acid	Polyamine Metabolism	43258	LC/MS Neg	100004541	2297	183.114	106692-36-8	129397	114601			yes	81.17	Yes
N1,N12-diacetylspermine	Amino Acid	Polyamine Metabolism	52987	LC/MS Pos Early	100002132	3105	287.244	61345-83-3	132680	117134	C03413	HMDB02172	no	258.694	No
N-acetylputrescine	Amino Acid	Polyamine Metabolism	37496	LC/MS Pos Early	192	2230	131.118	18233-70-0	122356	109095	C02714	HMDB02064	yes	39.5916	Yes
putrescine	Amino Acid	Polyamine Metabolism	1408	LC/MS Pos Early	49	3027	89.1073	110-60-1	1045	13837702	C00134	HMDB01414	no	43.4198	No
spermidine	Amino Acid	Polyamine Metabolism	485	LC/MS Pos Late	50	700	146.165	124-20-9	1102	1071	C00315	HMDB01257	yes	133.405	Yes
spermine	Amino Acid	Polyamine Metabolism	603	LC/MS Pos Late	507	758	203.223	71-44-3	1103	1072	C00750	HMDB01256	no	119.569	No
3-hydroxykynurenine	Amino Acid	Tryptophan Metabolism	22110	LC/MS Pos Early	100000986	2536	225.087	2147-61-7	89	87	C02794	HMDB00732	no	70.5763	No
3-indoxyl sulfate	Amino Acid	Tryptophan Metabolism	27672	LC/MS Neg	100000467	2222.2	212.002	2642-37-7	10258	9840		HMDB00682	yes	122.447	Yes
5-hydroxyindole sulfate	Amino Acid	Tryptophan Metabolism	52914	LC/MS Neg	100009042	1928	212.002						no	102.263	Yes
5-hydroxyindoleacetate	Amino Acid	Tryptophan Metabolism	437	LC/MS Pos Early	71	1893	192.066	54-16-0	1826	1760	C05635	HMDB00763	yes	138.236	Yes
7-hydroxyindole sulfate	Amino Acid	Tryptophan Metabolism	52915	LC/MS Neg	100009043	1765	212.002						no	119.059	No
C-glycosyltryptophan	Amino Acid	Tryptophan Metabolism	48782	LC/MS Neg	100006379	1777	365.135	180509-18-6	10981970	9157171			yes	102.801	Yes
indole-3-carboxylic acid	Amino Acid	Tryptophan Metabolism	38116	LC/MS Neg	100002185	1708.8	160.04	771-50-6	69867		C19837	HMDB03320	yes	52.2047	No
indoleacetate	Amino Acid	Tryptophan Metabolism	27513	LC/MS Neg	100001034	2200	174.056	6505-45-9	802	780	C00954	HMDB00197	yes	103.293	Yes
indoleacetylglutamine	Amino Acid	Tryptophan Metabolism	42087	LC/MS Neg	100001731	2535	302.115		25200879			HMDB13240	no	336.007	Yes
indolelactate	Amino Acid	Tryptophan Metabolism	18349	LC/MS Neg	100000463	2286	204.067	832-97-3	92904	83867	C02043	HMDB00671	yes	52.1771	Yes
indolepropionate	Amino Acid	Tryptophan Metabolism	32405	LC/MS Neg	100001083	2795	188.072	830-96-6	3744	3613		HMDB02302	yes	266.864	Yes
kynurenate	Amino Acid	Tryptophan Metabolism	1417	LC/MS Neg	98	2224	188.035	492-27-3	3845	3712	C01717	HMDB00715	yes	105.301	Yes
kynurenine	Amino Acid	Tryptophan Metabolism	15140	LC/MS Pos Early	100000265	2739	209.092	2922-83-0	161166	141580	C00328	HMDB00684	yes	34.9641	Yes
N-acetylkynurenine (2)	Amino Acid	Tryptophan Metabolism	48757	LC/MS Neg	100006378	2378	249.088						no	107.395	No
N-acetyltryptophan	Amino Acid	Tryptophan Metabolism	33959	LC/MS Neg	100001254	2630	245.093	1218-34-4	700653	610602	C03137	HMDB13713	yes	1469.29	Yes
picolinate	Amino Acid	Tryptophan Metabolism	1512	LC/MS Pos Early	1022	910	124.039	98-98-6	1018	993	C10164	HMDB02243	no	251.952	Yes
serotonin	Amino Acid	Tryptophan Metabolism	2342	LC/MS Pos Early	504	2550	177.102	153-98-0	5202	5013	C00780	HMDB00259	yes	59.3941	Yes
thioproline	Amino Acid	Tryptophan Metabolism	53231	LC/MS Pos Early	100009232	1250	134.027	34592-47-4	93176;6973609	84120			yes	55.3232	Yes
tryptophan	Amino Acid	Tryptophan Metabolism	54	LC/MS Pos Early	565	2986	205.097	73-22-3	6305	6066	C00078	HMDB00929	yes	26.053	Yes
tryptophan betaine	Amino Acid	Tryptophan Metabolism	37097	LC/MS Pos Early	100001743	2673	247.144	20671-76-5	442106	390633	C09213	HMDB61115	yes	95.2845	No
xanthurenate	Amino Acid	Tryptophan Metabolism	15679	LC/MS Neg	100000015	1476	204.03	59-007	5699	5497	C02470	HMDB00881	yes	110.828	Yes
arginine	Amino Acid	Urea cycle; Arginine and Proline Metabolism	1638	LC/MS Pos Early	231	2825	175.119	1119-34-2	232	227	C00062	HMDB00517	yes	27.3298	Yes
argininosuccinate	Amino Acid	Urea cycle; Arginine and Proline Metabolism	15497	LC/MS Pos Early	232	2745	291.13	156637-58-0	16950;828	805	C03406	HMDB00052	no	164.05	No
citrulline	Amino Acid	Urea cycle; Arginine and Proline Metabolism	2132	LC/MS Neg	391	715.6	174.088	372-75-8	9750	810	C00327	HMDB00904	yes	50.6693	Yes
dimethylarginine (SDMA + ADMA)	Amino Acid	Urea cycle; Arginine and Proline Metabolism	36808	LC/MS Pos Early	100001810	2850	203.15	102783-24-4	123831	110375	C03626	HMDB01539	yes	36.6142	Yes
homoarginine	Amino Acid	Urea cycle; Arginine and Proline Metabolism	22137	LC/MS Pos Early	100000961	2882	189.135	156-86-5	9085	8732	C01924	HMDB00670	yes	44.168	Yes
homocitrulline	Amino Acid	Urea cycle; Arginine and Proline Metabolism	22138	LC/MS Polar	100000963	3006.8	188.104	1190-49-4	65072	58582	C02427	HMDB00679	yes	137.859	Yes
N2,N5-diacetylornithine	Amino Acid	Urea cycle; Arginine and Proline Metabolism	43591	LC/MS Neg	100004575	1367	215.104	39825-23-5	10398396	8573834			yes	147.275	Yes
N-acetylarginine	Amino Acid	Urea cycle; Arginine and Proline Metabolism	33953	LC/MS Pos Early	100001266	2245	217.13	155-84-0	67427	60752	C02562	HMDB04620	yes	59.1997	Yes
N-acetylcitrulline	Amino Acid	Urea cycle; Arginine and Proline Metabolism	48434	LC/MS Neg	100001577	940	216.099	33965-42-3	656979	571213	C15532	HMDB00856	yes	160.076	Yes
N-acetylproline	Amino Acid	Urea cycle; Arginine and Proline Metabolism	34387	LC/MS Pos Early	100001334	1695	158.081	1074-79-9	322640	285677			yes	62.7299	Yes
N-alpha-acetylornithine	Amino Acid	Urea cycle; Arginine and Proline Metabolism	32984	LC/MS Pos Early	100000285	2000	175.108	6205-08-9	439232	388369	C00437	HMDB03357	no	62.0198	No
N-delta-acetylornithine	Amino Acid	Urea cycle; Arginine and Proline Metabolism	43249	LC/MS Neg	100004523	858	173.093		9920500	8096135			yes	93.6974	Yes
N-methylproline	Amino Acid	Urea cycle; Arginine and Proline Metabolism	37431	LC/MS Pos Early	100001956	1335	130.086	475-11-6	557	541			yes	133.572	Yes
N-monomethylarginine	Amino Acid	Urea cycle; Arginine and Proline Metabolism	43586	LC/MS Pos Early	100004488	2845	189.135	53308-83-1	132862	117259	C03884	HMDB29416	no	51.3058	No
ornithine	Amino Acid	Urea cycle; Arginine and Proline Metabolism	1493	LC/MS Pos Early	444	2800	133.097	3184-13-2	6262	6026	C00077	HMDB03374	yes	38.217	Yes
pro-hydroxy-pro	Amino Acid	Urea cycle; Arginine and Proline Metabolism	35127	LC/MS Pos Early	100001167	2128	229.118	18684-24-7	11673055	9847785		HMDB06695	yes	120.379	Yes
proline	Amino Acid	Urea cycle; Arginine and Proline Metabolism	1898	LC/MS Pos Early	480	1603	116.071	147-85-3	145742	128566	C00148	HMDB00162	yes	27.6181	Yes
trans-4-hydroxyproline	Amino Acid	Urea cycle; Arginine and Proline Metabolism	32306	LC/MS Pos Early	1001	1064	132.066	51-35-4	5810	5605	C01157	HMDB00725	yes	87.2931	Yes
urea	Amino Acid	Urea cycle; Arginine and Proline Metabolism	1670	LC/MS Pos Early	533	700	121.072	57-13-6	1176	1143	C00086	HMDB00294	yes	66.4293	Yes
N6-carboxymethyllysine	Carbohydrate	Advanced Glycation End-product	36713	LC/MS Pos Early	100001768	2500	205.118	5746-04-3		11217184			yes	161.854	Yes
erythronate*	Carbohydrate	Aminosugar Metabolism	42420	LC/MS Polar	100001320	2186	135.03	88759-55-1	2781043	2061231		HMDB00613	yes	51.0515	Yes
glucuronate	Carbohydrate	Aminosugar Metabolism	15443	LC/MS Polar	100000257	3233.3	193.035	207300-70-7	444791	58552	C00191	HMDB00127	yes	109.779	Yes
N-acetylglucosaminylasparagine	Carbohydrate	Aminosugar Metabolism	48149	LC/MS Pos Early	1215	1212	336.14	2776-93-4	123826	21403014	C04540	HMDB00489	no	112.687	No
N-acetylneuraminate	Carbohydrate	Aminosugar Metabolism	32377	LC/MS Pos Early	1162	660	310.113	131-48-6	439197	10292217	C00270	HMDB00230	yes	106.053	Yes
3-sialyllactose	Carbohydrate	Disaccharides and Oligosaccharides	40424	LC/MS Polar	100003408	3720	632.204	35890-38-1	123914	110445		HMDB00825	no	191.753	No
sucrose	Carbohydrate	Disaccharides and Oligosaccharides	1519	LC/MS Polar	935	3092	387.114	57-50-1	5988	5768	C00089	HMDB00258	no	221.703	Yes
fructose	Carbohydrate	Fructose, Mannose and Galactose Metabolism	48195	LC/MS Polar	878	2022.2	225.062	57-48-7	5984	5764	C00095	HMDB00660	yes	54.7017	Yes
galactonate	Carbohydrate	Fructose, Mannose and Galactose Metabolism	27719	LC/MS Polar	100001026	3085	195.051	299-28-5	128869	114198	C00880	HMDB00565	yes	162.022	Yes
mannitol/sorbitol	Carbohydrate	Fructose, Mannose and Galactose Metabolism	46142	LC/MS Polar	100001740	2260	181.072		5780	440	C01507	HMDB00247	yes	206.324	Yes
mannose	Carbohydrate	Fructose, Mannose and Galactose Metabolism	48153	LC/MS Polar	803	2200	225.062	3458-28-4	18950	141983	C00159	HMDB00169	yes	56.4938	Yes
maltohexaose	Carbohydrate	Glycogen Metabolism	35170	LC/MS Neg	100001448	1215.2	989.32	34620-77-4	439606	4450599	C01936	HMDB12253	no	0	No
maltopentaose	Carbohydrate	Glycogen Metabolism	35163	LC/MS Polar	100001447	5365	827.267	34620-76-3	13489094	2941513	C06218	HMDB12254	no	0	No
maltose	Carbohydrate	Glycogen Metabolism	15586	LC/MS Polar	913	3329.4	387.114	6363-53-7	10991489	388469	C00208	HMDB00163	yes	1532.4	Yes
maltotetraose	Carbohydrate	Glycogen Metabolism	15910	LC/MS Neg	100000275	910	665.215	34612-38-9	446495	393830	C02052	HMDB01296	no	0	No
maltotriose	Carbohydrate	Glycogen Metabolism	44688	LC/MS Polar	100000276	4286.4	549.167	1109-28-0	439586	388669	C01835	HMDB01262	no	0	No
1,5-anhydroglucitol (1,5-AG)	Carbohydrate	Glycolysis, Gluconeogenesis, and Pyruvate Metabolism	20675	LC/MS Neg	100000580	802	163.061	154-58-5	64960		C07326	HMDB02712	yes	73.1701	Yes
2-phosphoglycerate	Carbohydrate	Glycolysis, Gluconeogenesis, and Pyruvate Metabolism	35629	LC/MS Polar	100000093	4346	184.986	70195-25-4	59	13766841	C00631	HMDB03391	no	#DIV/0!	No
3-phosphoglycerate	Carbohydrate	Glycolysis, Gluconeogenesis, and Pyruvate Metabolism	1414	LC/MS Neg	132	583	184.986	80731-10-8	724	10669764	C00597	HMDB00807	no	385.398	Yes
glucose	Carbohydrate	Glycolysis, Gluconeogenesis, and Pyruvate Metabolism	48152	LC/MS Polar	572	2342	225.062	50-99-7	79025	71358	C00031	HMDB00122	yes	51.2853	Yes
glycerate	Carbohydrate	Glycolysis, Gluconeogenesis, and Pyruvate Metabolism	1572	LC/MS Polar	1052	2070.4	105.019	600-19-1	752	732	C00258	HMDB00139	yes	44.0285	Yes
Isobar: fructose 1,6-diphosphate, glucose 1,6-diphosphate, myo-inositol 1,4 or 1,3-diphosphate	Carbohydrate	Glycolysis, Gluconeogenesis, and Pyruvate Metabolism	46896	LC/MS Neg	100002180	551	338.989						no	#DIV/0!	No
lactate	Carbohydrate	Glycolysis, Gluconeogenesis, and Pyruvate Metabolism	527	LC/MS Neg	482	681.6	89.0244	79-33-4	612	592	C00186	HMDB00190	yes	50.6402	Yes
phosphoenolpyruvate (PEP)	Carbohydrate	Glycolysis, Gluconeogenesis, and Pyruvate Metabolism	597	LC/MS Polar	463	4212	166.975	10526-80-4	1005	980	C00074	HMDB00263	no	#DIV/0!	No
pyruvate	Carbohydrate	Glycolysis, Gluconeogenesis, and Pyruvate Metabolism	42584	LC/MS Neg	823	624	175.025	127-17-3	1060	96901	C00022	HMDB00243	yes	490.519	Yes
arabinose	Carbohydrate	Pentose Metabolism	575	LC/MS Polar	828	1804.5	195.051	28697-53-2	66308	59687	C00216	HMDB00646	no	68.6189	No
arabitol/xylitol	Carbohydrate	Pentose Metabolism	48885	LC/MS Polar	100006430	1932.4	151.061						yes	59.9409	Yes
arabonate/xylonate	Carbohydrate	Pentose Metabolism	48255	LC/MS Polar	100006115	2664.6	165.04						yes	103.306	Yes
ribitol	Carbohydrate	Pentose Metabolism	15772	LC/MS Polar	100000406	1789.6	151.061	488-81-3	6912	10254628	C00474	HMDB00508	yes	54.0164	Yes
ribonate	Carbohydrate	Pentose Metabolism	27731	LC/MS Polar	100001007	2425	165.04	5336-08-3	5460677	4574162	C01685	HMDB00867	yes	66.7413	No
sedoheptulose	Carbohydrate	Pentose Metabolism	53237	LC/MS Neg	100002619	725	209.067	3019-74-7	5459879	4573620		HMDB03219	no	113.62	No
xylose	Carbohydrate	Pentose Metabolism	15581	LC/MS Polar	826	1727	195.051	609-06-3	135191	85957	C00181	HMDB00098	no	130.158	No
6-phosphogluconate	Carbohydrate	Pentose Phosphate Pathway	15442	LC/MS Neg	100000341	583.9	275.017	921-62-0;53411-70-4	91493	82615	C00345	HMDB01316	no	#DIV/0!	No
ascorbate (Vitamin C)	Cofactors and Vitamins	Ascorbate and Aldarate Metabolism	32354	LC/MS Pos Early	233	770	177.039	134-03-2		10189562	C00072	HMDB00044	no	120.762	No
gulonic acid*	Cofactors and Vitamins	Ascorbate and Aldarate Metabolism	46957	LC/MS Polar	100001586	2750	195.051	20246-53-1	9794176	7969943			no	170.31	No
oxalate (ethanedioate)	Cofactors and Vitamins	Ascorbate and Aldarate Metabolism	20694	LC/MS Neg	100000841	603	88.988	144-62-7	971	946	C00209	HMDB02329	yes	57.294	Yes
threonate	Cofactors and Vitamins	Ascorbate and Aldarate Metabolism	27738	LC/MS Polar	100001022	2384	135.03	70753-61-6	151152	133224	C01620	HMDB00943	yes	63.5401	Yes
biotin	Cofactors and Vitamins	Biotin Metabolism	568	LC/MS Pos Early	251	2253	245.095	58-85-5	171548	149962	C00120	HMDB00030	no	204.466	No
bilirubin (E,E)*	Cofactors and Vitamins	Hemoglobin and Porphyrin Metabolism	32586	LC/MS Neg	100001950	4294	583.256	114-25-0	5315454	4474753			yes	74.9648	Yes
bilirubin (E,Z or Z,E)*	Cofactors and Vitamins	Hemoglobin and Porphyrin Metabolism	47886	LC/MS Pos Late	100001951	1270	585.271		5799469	4705847			yes	75.9637	Yes
bilirubin (Z,Z)	Cofactors and Vitamins	Hemoglobin and Porphyrin Metabolism	43807	LC/MS Pos Late	1090	1840	585.271	635-65-4	5280352	4444055	C00486	HMDB00054	yes	70.643	Yes
biliverdin	Cofactors and Vitamins	Hemoglobin and Porphyrin Metabolism	2137	LC/MS Pos Late	250	1016	583.255	55482-27-4;55482-27-4	5353439	10628548	C00500	HMDB01008	yes	137.775	Yes
D-urobilin	Cofactors and Vitamins	Hemoglobin and Porphyrin Metabolism	40084	LC/MS Pos Late	100002569	935	589.302	3947-38-4	6276321		C05795	HMDB04161	no	173.026	No
heme	Cofactors and Vitamins	Hemoglobin and Porphyrin Metabolism	41754	LC/MS Pos Late	100001386	1124	616.176	14875-96-8	26945		C00032	HMDB03178	yes	318.71	No
I-urobilinogen	Cofactors and Vitamins	Hemoglobin and Porphyrin Metabolism	32426	LC/MS Neg	100001226	4190	591.319	14684-37-8	26818	24980	C05790	HMDB04157	no	162.884	No
L-urobilin	Cofactors and Vitamins	Hemoglobin and Porphyrin Metabolism	40173	LC/MS Pos Late	100002568	901	595.349	34217-90-8	5280818	4444369	C05793	HMDB04159	no	166.666	No
1-methylnicotinamide	Cofactors and Vitamins	Nicotinate and Nicotinamide Metabolism	27665	LC/MS Pos Early	55	1940	137.071	1005-24-9	10129985	8305504	C02918	HMDB00699	yes	113.847	Yes
adenosine 5'-diphosphoribose (ADP-ribose)	Cofactors and Vitamins	Nicotinate and Nicotinamide Metabolism	558	LC/MS Neg	215	920	558.064	68414-18-6	192	3674071	C00301	HMDB01178	no	#DIV/0!	No
N1-Methyl-2-pyridone-5-carboxamide	Cofactors and Vitamins	Nicotinate and Nicotinamide Metabolism	40469	LC/MS Neg	100001468	1668	151.051	701-44-0	69698	62899	C05842	HMDB04193	yes	88.2451	Yes
nicotinamide	Cofactors and Vitamins	Nicotinate and Nicotinamide Metabolism	594	LC/MS Pos Early	432	1942	123.055	98-92-0	936	911	C00153	HMDB01406	yes	169.602	Yes
nicotinamide adenine dinucleotide (NAD+)	Cofactors and Vitamins	Nicotinate and Nicotinamide Metabolism	5278	LC/MS Neg	1310	1434	662.102	53-84-9	5893	5681	C00003	HMDB00902	no	#DIV/0!	No
quinolinate	Cofactors and Vitamins	Nicotinate and Nicotinamide Metabolism	1899	LC/MS Pos Early	182	845	168.029	89-00-9	1066	1037	C03722	HMDB00232	yes	101.882	Yes
trigonelline (N'-methylnicotinate)	Cofactors and Vitamins	Nicotinate and Nicotinamide Metabolism	32401	LC/MS Pos Early	100001092	1388	138.055	535-83-1	5570	5369	C01004	HMDB00875	yes	122.474	Yes
pantothenate	Cofactors and Vitamins	Pantothenate and CoA Metabolism	1508	LC/MS Neg	1024	1498.7	218.103	137-08-6	6613	6361	C00864	HMDB00210	yes	130.698	Yes
riboflavin (Vitamin B2)	Cofactors and Vitamins	Riboflavin Metabolism	1827	LC/MS Pos Early	500	2292	377.146	83-88-5	493570	431981	C00255	HMDB00244	no	114.206	No
alpha-CEHC glucuronide*	Cofactors and Vitamins	Tocopherol Metabolism	39346	LC/MS Neg	100003101	2616	453.177	477200-36-5					no	253.356	No
alpha-CEHC sulfate	Cofactors and Vitamins	Tocopherol Metabolism	47666	LC/MS Neg	100005972	3090	357.101						no	456.496	No
alpha-tocopherol	Cofactors and Vitamins	Tocopherol Metabolism	1561	LC/MS Pos Late	1105	2522	430.378	59-02-9;10191-41-0	14985	14265	C02477	HMDB01893	yes	39.0139	Yes
delta-tocopherol	Cofactors and Vitamins	Tocopherol Metabolism	33418	LC/MS Pos Late	100001216	2259	402.349	119-13-1	92094	83144	C14151	HMDB02902	no	38.4976	No
gamma-CEHC	Cofactors and Vitamins	Tocopherol Metabolism	44876	LC/MS Neg	100002094	3843	263.129	178167-75-4	133098	117455		HMDB01931	yes	59.1113	Yes
gamma-CEHC glucuronide*	Cofactors and Vitamins	Tocopherol Metabolism	42381	LC/MS Neg	100004243	2500	439.161						no	313.154	Yes
gamma-tocopherol/beta-tocopherol	Cofactors and Vitamins	Tocopherol Metabolism	52473	LC/MS Pos Late	100008998	2384	416.364						yes	62.807	Yes
retinol (Vitamin A)	Cofactors and Vitamins	Vitamin A Metabolism	1806	LC/MS Pos Late	498	1636	269.226	68-26-8	445354	393012	C00473	HMDB00305	yes	44.1452	Yes
pyridoxal	Cofactors and Vitamins	Vitamin B6 Metabolism	1651	LC/MS Pos Early	491	2343	168.066	65-22-5	1050	1021	C00250	HMDB01545	no	479.2	No
pyridoxamine	Cofactors and Vitamins	Vitamin B6 Metabolism	2150	LC/MS Pos Early	568	2975	169.097	58052-48-5	1052	1023	C00534	HMDB01431	no	250.003	No
pyridoxate	Cofactors and Vitamins	Vitamin B6 Metabolism	31555	LC/MS Neg	100001121	2185	182.046	82-82-6	6723	6467	C00847	HMDB00017	yes	529.29	Yes
pyridoxine (Vitamin B6)	Cofactors and Vitamins	Vitamin B6 Metabolism	608	LC/MS Pos Early	936	2442	170.081	58-56-0	1054	1025	C00314	HMDB02075	no	61.7352	No
acetylphosphate	Energy	Oxidative Phosphorylation	15488	LC/MS Polar	1211	4013.9	138.98	94249-01-1	186	181	C00227	HMDB01494	no	100.655	No
phosphate	Energy	Oxidative Phosphorylation	42109	LC/MS Neg	461	608	96.9696	7664-38-2	1061	1032	C00009	HMDB01429	yes	9.23404	Yes
2-methylcitrate/homocitrate	Energy	TCA Cycle	52282	LC/MS Neg	100008929	575	205.035						yes	67.4137	No
aconitate [cis or trans]	Energy	TCA Cycle	46173	LC/MS Neg	100001359	580	173.009				C00417	HMDB00072	yes	48.5966	Yes
alpha-ketoglutarate	Energy	TCA Cycle	528	LC/MS Polar	93	2700	145.014	305-72-6;328-50-7;22202-68-2	51	50	C00026	HMDB00208	yes	117.173	Yes
citraconate/glutaconate	Energy	TCA Cycle	47076	LC/MS Polar	100006438	2600	129.019						yes	74.5137	No
citrate	Energy	TCA Cycle	1564	LC/MS Neg	1124	582	191.02	77-92-9	311	305	C00158	HMDB00094	yes	30.3539	Yes
fumarate	Energy	TCA Cycle	1643	LC/MS Polar	330	3084	115.004	100-17-8	444972	10197150	C00122	HMDB00134	yes	67.9451	Yes
isocitrate	Energy	TCA Cycle	12110	LC/MS Pos Early	1206	773	210.061	20226-99-7	1198	1161	C00311	HMDB00193	yes	62.5359	No
malate	Energy	TCA Cycle	1303	LC/MS Neg	409	615.6	133.014	6915-15-7	525	510	C00149	HMDB00156	yes	70.1259	Yes
succinate	Energy	TCA Cycle	1437	LC/MS Neg	252	603	117.019	110-15-6	1110	1078	C00042	HMDB00254	yes	27.6204	Yes
succinylcarnitine	Energy	TCA Cycle	37058	LC/MS Pos Early	100001948	2291	262.129						yes	78.2155	No
carnitine	Lipid	Carnitine Metabolism	15500	LC/MS Pos Early	100000007	1978	162.112	461-05-2	10917	10455	C00318	HMDB00062	yes	24.0452	Yes
deoxycarnitine	Lipid	Carnitine Metabolism	36747	LC/MS Pos Early	100001662	2052	146.118	6249-56-5	134	705	C01181	HMDB01161	yes	34.5044	Yes
1-oleoyl-2-linoleoyl-glycerol (18:1/18:2)	Lipid	Diacylglycerol	46798	LC/MS Pos Late	100002989	3115	636.556	106292-55-1		23975985			yes	51.653	No
1-oleoyl-3-linoleoyl-glycerol (18:1/18:2)	Lipid	Diacylglycerol	46799	LC/MS Pos Late	100002990	3223	636.556	104346-53-4					yes	54.6596	No
1-palmitoleoyl-2-oleoyl-glycerol (16:1/18:1)*	Lipid	Diacylglycerol	52632	LC/MS Pos Late	100009053	3035	610.541		9543694	7822644		HMDB07131	yes	88.5166	No
1-palmitoleoyl-3-oleoyl-glycerol (16:1/18:1)*	Lipid	Diacylglycerol	52631	LC/MS Pos Late	100009054	3154	610.541						yes	92.0437	No
1-palmitoyl-2-linoleoyl-glycerol (16:0/18:2)*	Lipid	Diacylglycerol	52633	LC/MS Pos Late	100009052	3080	610.541		9543695	7822645		HMDB05207	yes	69.1023	No
1-palmitoyl-3-linoleoyl-glycerol (16:0/18:2)*	Lipid	Diacylglycerol	52634	LC/MS Pos Late	100009055	3197	610.541						yes	70.8316	No
12-HETE	Lipid	Eicosanoid	37536	LC/MS Neg	100002167	5326	319.228	71030-37-0;73837-14-6	5312983	21509475		HMDB06111	yes	242.934	No
15-HETE	Lipid	Eicosanoid	37538	LC/MS Neg	100000565	5298	319.228	54845-95-3	5280724	4444307	C04742	HMDB02110	no	140.211	No
5-HEPE	Lipid	Eicosanoid	46297	LC/MS Neg	100002135	5316	317.212	83952-40-3	6439678	4944072		HMDB05081	no	153.785	No
5-HETE	Lipid	Eicosanoid	37372	LC/MS Neg	100002137	5382	319.228	73307-52-5	5280733	8038582	C04805	HMDB11134	no	142.353	Yes
thromboxane B2	Lipid	Eicosanoid	17807	LC/MS Neg	1308	4526	369.228	54397-85-2	5283137	4446261	C05963	HMDB03252	no	208.631	No
arachidonoyl ethanolamide	Lipid	Endocannabinoid	32463	LC/MS Pos Late	1488	1535	348.29	94421-68-8	5281969	4445241	C11695	HMDB04080	no	38.8648	No
linoleoyl ethanolamide	Lipid	Endocannabinoid	52608	LC/MS Neg	100006726	6150	322.275	68171-52-8	5283446	4446566		HMDB12252	no	77.6292	No
N-palmitoyltaurine	Lipid	Endocannabinoid	39835	LC/MS Neg	100003239	5560	362.237	83982-06-3		14435932			no	50.767	No
N-stearoyltaurine	Lipid	Endocannabinoid	39730	LC/MS Neg	100003240	5782	390.268	63155-80-6	168274	147194			no	45.8284	No
oleoyl ethanolamide	Lipid	Endocannabinoid	38102	LC/MS Neg	1137	6400	324.291	11-58-0;111-58-0	5283454	4446574		HMDB02088	yes	49.1479	Yes
palmitoyl ethanolamide	Lipid	Endocannabinoid	38165	LC/MS Neg	1489	6300	298.275	544-31-0	4671	4509	C16512	HMDB02100	yes	38.2807	Yes
palmitoylcholine	Lipid	Fatty Acid Metabolism (Acyl Choline)	52944	LC/MS Pos Late	100009233	1482	342.337		151731	133731			yes	81.4178	Yes
butyrylcarnitine	Lipid	Fatty Acid Metabolism (also BCAA Metabolism)	32412	LC/MS Pos Early	100001054	2860	232.154	25576-40-3	439829	184820	C02862	HMDB02013	yes	86.7927	No
butyrylglycine	Lipid	Fatty Acid Metabolism (also BCAA Metabolism)	31850	LC/MS Neg	100001151	1470	144.067	20208-73-5	88412	79766		HMDB00808	no	68.5497	No
propionylcarnitine	Lipid	Fatty Acid Metabolism (also BCAA Metabolism)	32452	LC/MS Pos Early	100001162	2590	218.139	17298-37-2	107738	96904	C03017	HMDB00824	yes	59.7345	No
propionylglycine	Lipid	Fatty Acid Metabolism (also BCAA Metabolism)	31932	LC/MS Neg	100001150	960	130.051	21709-90-0	98681	89122		HMDB00783	yes	74.2021	Yes
3-hydroxybutyrylcarnitine (1)	Lipid	Fatty Acid Metabolism(Acyl Carnitine)	43264	LC/MS Pos Early	100003926	2400	248.149		53481617			HMDB13127	no	92.5566	No
acetylcarnitine	Lipid	Fatty Acid Metabolism(Acyl Carnitine)	32198	LC/MS Pos Early	100000802	2282	204.123	5080-50-2	1	5406074	C02571	HMDB00201	yes	68.4109	No
adipoylcarnitine	Lipid	Fatty Acid Metabolism(Acyl Carnitine)	52988	LC/MS Pos Early	100006614	2558	290.16			28540385			no	159.811	No
cis-4-decenoyl carnitine	Lipid	Fatty Acid Metabolism(Acyl Carnitine)	38178	LC/MS Pos Late	100002259	1057	314.233	98930-66-6					yes	63.1099	No
decanoylcarnitine	Lipid	Fatty Acid Metabolism(Acyl Carnitine)	33941	LC/MS Pos Late	100001251	1130	316.248	1492-27-9	10245190	8420677		HMDB00651	yes	66.5335	No
hexanoylcarnitine	Lipid	Fatty Acid Metabolism(Acyl Carnitine)	32328	LC/MS Pos Early	100000781	3308	260.186	6920-35-0	6426853	4932273		HMDB00705	yes	59.0003	No
laurylcarnitine	Lipid	Fatty Acid Metabolism(Acyl Carnitine)	34534	LC/MS Pos Late	100001392	1235	344.28	25518-54-1	10427569	8602997		HMDB02250	yes	56.9047	No
linoleoylcarnitine*	Lipid	Fatty Acid Metabolism(Acyl Carnitine)	46223	LC/MS Pos Late	100003151	1430	424.342	36816-10-1	6450015	4952667		HMDB06469	yes	49.2055	No
myristoleoylcarnitine*	Lipid	Fatty Acid Metabolism(Acyl Carnitine)	48182	LC/MS Pos Late	100006051	1316	370.295	889848-55-9					yes	61.7591	No
myristoylcarnitine	Lipid	Fatty Acid Metabolism(Acyl Carnitine)	33952	LC/MS Pos Late	100001270	1350	372.311	18822-89-4	53477791	4932274		HMDB05066	yes	40.1721	No
octanoylcarnitine	Lipid	Fatty Acid Metabolism(Acyl Carnitine)	33936	LC/MS Pos Late	100001247	950	288.217	3671-77-0	123701	110274	C02838	HMDB00791	yes	69.5016	No
oleoylcarnitine	Lipid	Fatty Acid Metabolism(Acyl Carnitine)	35160	LC/MS Pos Late	100001501	1423	426.358	38677-66-6	6441392;53477789	21403150		HMDB05065	yes	49.2919	No
palmitoleoylcarnitine*	Lipid	Fatty Acid Metabolism(Acyl Carnitine)	53223	LC/MS Pos Late	100009406	1357	398.326			28639183			yes	48.4918	No
palmitoylcarnitine	Lipid	Fatty Acid Metabolism(Acyl Carnitine)	44681	LC/MS Pos Late	100000776	1425	400.342	6865-14-1	461	448	C02990	HMDB00222	yes	37.68	No
stearoylcarnitine	Lipid	Fatty Acid Metabolism(Acyl Carnitine)	34409	LC/MS Pos Late	100001391	1485	428.373	18822-91-8	6426855	21233653		HMDB00848	yes	50.2746	No
suberoyl carnitine	Lipid	Fatty Acid Metabolism(Acyl Carnitine)	52990	LC/MS Pos Early	100006627	2964	318.191						no	223.928	No
hexanoylglycine	Lipid	Fatty Acid Metabolism(Acyl Glycine)	35436	LC/MS Neg	100001527	2900	172.098	24003-67-6	99463	89859		HMDB00701	no	73.0821	No
N-linoleoylglycine	Lipid	Fatty Acid Metabolism(Acyl Glycine)	32462	LC/MS Neg	1506	5510	336.254	2764-03-6	6433346	4938516			no	71.4913	No
N-octanoylglycine	Lipid	Fatty Acid Metabolism(Acyl Glycine)	43502	LC/MS Neg	100003940	4335.4	200.129	14246-53-8	84290	76040		HMDB00832	no	110.053	No
N-palmitoyl glycine	Lipid	Fatty Acid Metabolism(Acyl Glycine)	42092	LC/MS Neg	100003686	5580	312.254	2441-41-0	151008	133100			yes	40.5465	No
2-methylmalonyl carnitine	Lipid	Fatty Acid Synthesis	35482	LC/MS Pos Early	100001596	2440	262.129	149181-64-6	53481628	21403178		HMDB13133	no	87.3144	No
malonate	Lipid	Fatty Acid Synthesis	15872	LC/MS Polar	818	3447	103.004	141-82-2;26522-22-85-0	867	844	C00383	HMDB00691	yes	37.7677	No
2-aminoheptanoate	Lipid	Fatty Acid, Amino	43761	LC/MS Pos Early	100004542	3160	146.118	1115-90-8	227939	198338			yes	45.9212	Yes
2-aminooctanoate	Lipid	Fatty Acid, Amino	43343	LC/MS Pos Late	100004227	750	160.133	644-90-6	69522	62727		HMDB00991	yes	70.8589	Yes
13-methylmyristate	Lipid	Fatty Acid, Branched	38293	LC/MS Neg	100002344	5499	241.217	2485-71-4	151014	133106			no	56.8927	No
15-methylpalmitate	Lipid	Fatty Acid, Branched	38768	LC/MS Neg	100002945	5695	269.249		17903417				yes	58.0006	No
17-methylstearate	Lipid	Fatty Acid, Branched	38296	LC/MS Neg	100002356	5993	297.28	2724-59-6	3083779	2340933			yes	92.8038	No
isocaproate	Lipid	Fatty Acid, Branched	22273	LC/MS Neg	100000806	2570	115.076	646-07-1	12587	12067		HMDB00689	no	108.797	No
pristanate	Lipid	Fatty Acid, Branched	38271	LC/MS Neg	477	5773	297.28	1189-37-3	123929	110458		HMDB00795	no	66.0436	No
2-hydroxyadipate	Lipid	Fatty Acid, Dicarboxylate	31934	LC/MS Polar	100001153	3000	161.046	18294-85-4	193530	167943	C02360	HMDB00321	no	118.149	No
2-hydroxyglutarate	Lipid	Fatty Acid, Dicarboxylate	37253	LC/MS Pos Early	100002070	958	131.034	40951-21-1	43	42	C02630	HMDB00606	yes	59.7741	Yes
3-carboxy-4-methyl-5-propyl-2-furanpropanoate (CMPF)	Lipid	Fatty Acid, Dicarboxylate	31787	LC/MS Neg	100001178	2840	239.092	86879-39-2	123979	110498		HMDB61112	yes	150.337	Yes
3-methyladipate	Lipid	Fatty Acid, Dicarboxylate	36749	LC/MS Polar	100001765	2865	159.066	3058-01-3	12292	11789		HMDB00555	no	159.42	No
azelate (nonanedioate)	Lipid	Fatty Acid, Dicarboxylate	18362	LC/MS Polar	2029	2520	187.098	123-99-9	2266	2179	C08261	HMDB00784	yes	234.931	No
docosadioate	Lipid	Fatty Acid, Dicarboxylate	39837	LC/MS Neg	100002952	5291.8	369.301	505-56-6	244872	214170			yes	64.4399	No
dodecanedioate	Lipid	Fatty Acid, Dicarboxylate	32388	LC/MS Neg	100001102	2990	229.145	693-23-2	12736	12213	C02678	HMDB00623	yes	130.525	No
eicosanodioate	Lipid	Fatty Acid, Dicarboxylate	39831	LC/MS Neg	100002951	5200.9	341.27	2424-92-2	75502	68030			yes	64.5172	No
hexadecanedioate	Lipid	Fatty Acid, Dicarboxylate	35678	LC/MS Neg	100001614	4615	285.207	505-54-4	10459	10027	C19615	HMDB00672	yes	57.7751	No
maleate	Lipid	Fatty Acid, Dicarboxylate	20676	LC/MS Polar	100000707	2510	115.004	110-16-7	444266	392248	C01384	HMDB00176	yes	250.265	Yes
octadecanedioate	Lipid	Fatty Acid, Dicarboxylate	36754	LC/MS Neg	100001615	5043	313.238	871-70-5	70095	63283		HMDB00782	yes	52.2644	No
pimelate (heptanedioate)	Lipid	Fatty Acid, Dicarboxylate	15704	LC/MS Polar	100000101	2745	159.066	111-16-0	385	376	C02656	HMDB00857	no	139.411	No
sebacate (decanedioate)	Lipid	Fatty Acid, Dicarboxylate	32398	LC/MS Neg	100001211	1788	201.113	111-20-6	5192	5004	C08277	HMDB00792	yes	357.621	No
suberate (octanedioate)	Lipid	Fatty Acid, Dicarboxylate	15730	LC/MS Polar	100000016	2577.6	173.082	505-48-6	10457	10025	C08278	HMDB00893	no	167.713	No
tetradecanedioate	Lipid	Fatty Acid, Dicarboxylate	35669	LC/MS Neg	100001613	4000	257.176	821-38-5	13185	12630		HMDB00872	yes	60.9236	No
undecanedioate	Lipid	Fatty Acid, Dicarboxylate	42395	LC/MS Neg	100001617	2440	215.129	1852-04-6	15816	15037		HMDB00888	yes	297.812	No
12,13-DiHOME	Lipid	Fatty Acid, Dihydroxy	38395	LC/MS Neg	62	5137	313.238	263399-35-5	10236635	8412123	C14829	HMDB04705	yes	74.1036	Yes
9,10-DiHOME	Lipid	Fatty Acid, Dihydroxy	38399	LC/MS Neg	179	5180	313.238	263399-34-4	9966640	8142232	C14828	HMDB04704	yes	103.459	Yes
1-dihomo-linoleoylglycerol (20:2)	Lipid	Fatty Acid, Keto	35103	LC/MS Neg	100001483	6800	307.264			21403143			yes	122.608	No
10-hydroxystearate	Lipid	Fatty Acid, Monohydroxy	47123	LC/MS Neg	100005852	5370	299.259		9561835	7838048			no	137.507	No
13-HODE + 9-HODE	Lipid	Fatty Acid, Monohydroxy	37752	LC/MS Neg	100002196	5275	295.228		43013				yes	62.6906	Yes
14-HDoHE/17-HDoHE	Lipid	Fatty Acid, Monohydroxy	53034	LC/MS Neg	100009278	5296	343.228						yes	251.901	No
16-hydroxypalmitate	Lipid	Fatty Acid, Monohydroxy	39609	LC/MS Neg	100002953	5236.2	271.228	506-13-8	10466	10034	C18218	HMDB06294	yes	33.0065	Yes
2-hydroxydecanoate	Lipid	Fatty Acid, Monohydroxy	42489	LC/MS Neg	100004089	4840	187.134	5393-81-7	21488	20195			yes	80.6857	Yes
2-hydroxyoctanoate	Lipid	Fatty Acid, Monohydroxy	22036	LC/MS Neg	100000743	3736.8	159.103	617-73-2	94180	84994		HMDB02264	yes	81.2276	Yes
2-hydroxypalmitate	Lipid	Fatty Acid, Monohydroxy	35675	LC/MS Neg	100001579	5511.2	271.228	764-67-0	92836	83805		HMDB31057	yes	29.6478	Yes
2-hydroxystearate	Lipid	Fatty Acid, Monohydroxy	17945	LC/MS Neg	1239	5695	299.259	629-22-1	69417	62625	C03045		yes	28.8705	Yes
3-hydroxydecanoate	Lipid	Fatty Acid, Monohydroxy	22053	LC/MS Neg	100000997	4634.7	187.134	5561-87-5	26612	24790		HMDB02203	yes	101.599	Yes
3-hydroxyhexanoate	Lipid	Fatty Acid, Monohydroxy	53230	LC/MS Neg	100006367	1725	131.071	10191-24-9	151492	133518			yes	57.877	Yes
3-hydroxylaurate	Lipid	Fatty Acid, Monohydroxy	32457	LC/MS Neg	100001112	5175	215.165	53941-38-1	94216	85026		HMDB00387	yes	73.2979	No
3-hydroxymyristate	Lipid	Fatty Acid, Monohydroxy	21158	LC/MS Neg	100000882	5335	243.197	3422-31-9	16064	15252			yes	71.7455	No
3-hydroxyoctanoate	Lipid	Fatty Acid, Monohydroxy	22001	LC/MS Neg	100000773	3446	159.103	88930-08-9	26613	24791		HMDB01954	yes	114.124	Yes
3-hydroxypalmitate	Lipid	Fatty Acid, Monohydroxy	27503	LC/MS Neg	100000983	5476	271.228	928-17-6	301590	266538		HMDB10734	no	31.2332	No
3-hydroxypropanoate	Lipid	Fatty Acid, Monohydroxy	1556	LC/MS Polar	115	1845	89.0244	503-66-2	68152	4573601	C01013	HMDB00700	no	109.75	No
3-hydroxysebacate	Lipid	Fatty Acid, Monohydroxy	31943	LC/MS Neg	100001145	1282.1	217.108	73141-46-5	3017884	2285525		HMDB00350	no	126.194	Yes
3-hydroxystearate	Lipid	Fatty Acid, Monohydroxy	52938	LC/MS Neg	100008933	5674	299.259	45261-96-9	5282907	4446034			yes	32.2341	No
5-hydroxyhexanoate	Lipid	Fatty Acid, Monohydroxy	31938	LC/MS Neg	100001148	1267	131.071	44843-89-2	170748	149280		HMDB00525	yes	82.7807	Yes
8-hydroxyoctanoate	Lipid	Fatty Acid, Monohydroxy	21239	LC/MS Neg	100000956	2300.4	159.103	764-89-6	69820	63018			no	74.5603	Yes
9-hydroxystearate	Lipid	Fatty Acid, Monohydroxy	47120	LC/MS Neg	100005834	5384	299.259	25498-28-6	9570127	7844595			yes	60.6011	Yes
alpha-hydroxycaproate	Lipid	Fatty Acid, Monohydroxy	37073	LC/MS Neg	100001723	1920	131.071	6064-63-7	99824	90191		HMDB01624	no	48.529	Yes
epiandrosterone glucuronide	Lipid	Fatty Acid, Monohydroxy	47111	LC/MS Neg	100005400	4642	465.249	4271-00-5	10298641	8474109			no	234.553	No
glycerol	Lipid	Glycerolipid Metabolism	15122	LC/MS Neg	1254	758	91.0401	56-81-5	753	733	C00116	HMDB00131	yes	52.0348	Yes
glycerol 3-phosphate	Lipid	Glycerolipid Metabolism	43847	LC/MS Pos Early	100000258	580	173.021	29849-82-9	754	734	C00093	HMDB00126	yes	63.2863	Yes
chiro-inositol	Lipid	Inositol Metabolism	37112	LC/MS Polar	100001859	3191.2	225.062	643-12-9		10254647	C19891	HMDB34220	no	154.542	No
myo-inositol	Lipid	Inositol Metabolism	1124	LC/MS Polar	363	3506.3	225.062	87-89-8	892	10239179	C00137	HMDB00211	yes	85.6369	Yes
3-hydroxybutyrate (BHBA)	Lipid	Ketone Bodies	542	LC/MS Polar	254	1443.3	103.04	625-72-9	441	428	C01089	HMDB00357	yes	207.888	Yes
10-heptadecenoate (17:1n7)	Lipid	Long Chain Fatty Acid	33971	LC/MS Neg	100001278	5555	267.233	29743-97-3	5312435	4471860		HMDB60038	yes	76.5505	Yes
10-nonadecenoate (19:1n9)	Lipid	Long Chain Fatty Acid	33972	LC/MS Neg	100001277	5780	295.264	73033-09-7	5312513	4471938		HMDB13622	yes	72.6088	Yes
arachidate (20:0)	Lipid	Long Chain Fatty Acid	1118	LC/MS Neg	893	6295	311.296	506-30-9	10467	10035	C06425	HMDB02212	yes	35.3252	No
eicosenoate (20:1)	Lipid	Long Chain Fatty Acid	33587	LC/MS Neg	100001335	5950	309.28		5282768	4445895		HMDB02231	yes	76.2281	Yes
erucate (22:1n9)	Lipid	Long Chain Fatty Acid	1552	LC/MS Neg	1087	6355.6	337.311	112-86-7	5281116	7924	C08316	HMDB02068	yes	350.078	Yes
margarate (17:0)	Lipid	Long Chain Fatty Acid	1121	LC/MS Neg	891	5731	269.249	506-12-7	10465	10033		HMDB02259	yes	55.8026	Yes
myristate (14:0)	Lipid	Long Chain Fatty Acid	1365	LC/MS Neg	519	5440	227.202	544-63-8	11005	10539	C06424	HMDB00806	yes	53.8381	Yes
myristoleate (14:1n5)	Lipid	Long Chain Fatty Acid	32418	LC/MS Neg	100001198	5346.9	225.186	544-64-9	5281119	4444564	C08322	HMDB02000	yes	83.498	Yes
nonadecanoate (19:0)	Lipid	Long Chain Fatty Acid	1356	LC/MS Neg	892	6068	297.28	646-30-0	12591	12071	C16535	HMDB00772	yes	81.6261	Yes
oleate/vaccenate (18:1)	Lipid	Long Chain Fatty Acid	52285	LC/MS Neg	100008930	5655	281.249						yes	53.0128	Yes
palmitate (16:0)	Lipid	Long Chain Fatty Acid	1336	LC/MS Neg	424	5618	255.233	57-10-3	985	960	C00249	HMDB00220	yes	31.4551	Yes
palmitoleate (16:1n7)	Lipid	Long Chain Fatty Acid	33447	LC/MS Neg	452	5475	253.217	373-49-9	445638	393216	C08362	HMDB03229	yes	86.7358	Yes
pentadecanoate (15:0)	Lipid	Long Chain Fatty Acid	1361	LC/MS Neg	980	5521	241.217	1002-84-2;10002-84-2	13849	13249	C16537	HMDB00826	yes	35.0942	Yes
stearate (18:0)	Lipid	Long Chain Fatty Acid	1358	LC/MS Neg	439	5872	283.264	57-11-4	5281	5091	C01530	HMDB00827	yes	27.2507	Yes
tricosenoate (23:1)	Lipid	Long Chain Fatty Acid	53255	LC/MS Neg	100009068	6400	351.327		543855	473411			yes	103.525	No
1-arachidonoyl-GPA (20:4)	Lipid	Lysolipid	46325	LC/MS Neg	100004442	5499	457.236	799268-65-8					yes	61.9297	Yes
1-arachidonoyl-GPC (20:4n6)*	Lipid	Lysolipid	33228	LC/MS Pos Late	100001551	1460	544.34			21403155	C05208	HMDB10395	yes	39.5198	Yes
1-arachidonoyl-GPE (20:4n6)*	Lipid	Lysolipid	35186	LC/MS Pos Late	100001571	1450	502.293		42607465	21403171		HMDB11517	yes	32.8427	Yes
1-arachidonoyl-GPI (20:4)*	Lipid	Lysolipid	34214	LC/MS Neg	100001654	5482	619.289					HMDB61690	yes	44.2562	Yes
1-lignoceroyl-GPC (24:0)	Lipid	Lysolipid	49617	LC/MS Pos Late	100002873	1907	608.465	325171-59-3					yes	42.4691	Yes
1-linolenoyl-GPC (18:3)*	Lipid	Lysolipid	45951	LC/MS Pos Late	100005350	1422	518.324						yes	53.2731	Yes
1-linoleoyl-GPA (18:2)*	Lipid	Lysolipid	52690	LC/MS Neg	100009082	5483	433.236			24766514		HMDB07856	yes	99.0862	Yes
1-linoleoyl-GPC (18:2)	Lipid	Lysolipid	34419	LC/MS Pos Late	100001395	1465	520.34		11988421	10160888	C04100	HMDB10386	yes	36.4741	Yes
1-linoleoyl-GPE (18:2)*	Lipid	Lysolipid	36600	LC/MS Pos Late	100001570	1482	478.293		52925130	21403170		HMDB11507	yes	44.8572	Yes
1-linoleoyl-GPI (18:2)*	Lipid	Lysolipid	36594	LC/MS Neg	100001778	5494	595.289						yes	51.5147	Yes
1-oleoyl-GPA (18:1)	Lipid	Lysolipid	36812	LC/MS Neg	100001671	5615	435.252	325465-93-8	5497152	4593722			no	131.995	No
1-oleoyl-GPC (18:1)	Lipid	Lysolipid	48258	LC/MS Pos Late	100001272	1540	522.355	19420-56-5	16081932	17240641		HMDB02815	yes	31.9537	Yes
1-oleoyl-GPE (18:1)	Lipid	Lysolipid	35628	LC/MS Pos Late	100001569	1554	480.308	89576-29-4	9547071	7826021		HMDB11506	yes	46.2219	Yes
1-oleoyl-GPG (18:1)*	Lipid	Lysolipid	45968	LC/MS Neg	100005716	5610	509.288						no	44.7981	No
1-oleoyl-GPI (18:1)*	Lipid	Lysolipid	36602	LC/MS Neg	100001777	5599	597.305						yes	59.5006	No
1-oleoyl-GPS (18:1)	Lipid	Lysolipid	19260	LC/MS Neg	100000630	5607	522.284		9547099	7826049			no	65.9609	No
1-palmitoleoyl-GPA (16:1)*	Lipid	Lysolipid	52691	LC/MS Polar	100009085	1467	407.22			29368482			no	100.456	No
1-palmitoleoyl-GPC (16:1)*	Lipid	Lysolipid	33230	LC/MS Pos Late	100001511	1450	494.324		24779461	21403152		HMDB10383	yes	44.3951	Yes
1-palmitoyl-GPA (16:0)	Lipid	Lysolipid	34428	LC/MS Neg	100001445	5600	409.236	17618-08-5	6419701	4925335	C04036	HMDB00327	yes	123.057	Yes
1-palmitoyl-GPC (16:0)	Lipid	Lysolipid	33955	LC/MS Pos Late	100001263	1525	496.34	17364-16-8	86554	78064		HMDB10382	yes	25.071	Yes
1-palmitoyl-GPE (16:0)	Lipid	Lysolipid	35631	LC/MS Pos Late	100001567	1544	454.293		9547069	7826019		HMDB11503	yes	37.1566	Yes
1-palmitoyl-GPI (16:0)*	Lipid	Lysolipid	35305	LC/MS Neg	100001655	5564	571.289					HMDB61695	yes	67.043	No
1-stearoyl-GPA (18:0)	Lipid	Lysolipid	36810	LC/MS Neg	100001670	5829	437.267	325465-92-7;799268-65-8	89567	80837			no	85.2479	No
1-stearoyl-GPC (18:0)	Lipid	Lysolipid	33961	LC/MS Pos Late	100001271	1606	524.371	19420-57-6	497299	435389		HMDB10384	yes	32.7305	Yes
1-stearoyl-GPE (18:0)	Lipid	Lysolipid	42398	LC/MS Pos Late	100001461	1626	482.324	69747-55-3	9547068	7826018		HMDB11130	yes	39.2383	Yes
1-stearoyl-GPI (18:0)	Lipid	Lysolipid	19324	LC/MS Neg	100000656	5794.3	599.32	796963-93-4		21403067		HMDB61696	yes	53.5665	Yes
1-stearoyl-GPS (18:0)*	Lipid	Lysolipid	45966	LC/MS Neg	100004327	5800	524.299		9547101	7826051			no	119.273	Yes
2-palmitoleoyl-GPC (16:1)*	Lipid	Lysolipid	47118	LC/MS Neg	100001561	5720	568.326			21403164			no	58.1618	No
2-palmitoyl-GPC (16:0)*	Lipid	Lysolipid	35253	LC/MS Neg	100001562	6215	570.341		15061532	21403165		HMDB61702	yes	38.6572	Yes
2-stearoyl-GPE (18:0)*	Lipid	Lysolipid	41220	LC/MS Neg	100003901	6350	480.31			24769218			yes	49.3959	Yes
1-(1-enyl-oleoyl)-GPE (P-18:1)*	Lipid	Lysoplasmalogen	44621	LC/MS Pos Late	100005372	1566	464.314						yes	47.2917	Yes
1-(1-enyl-palmitoyl)-GPC (P-16:0)*	Lipid	Lysoplasmalogen	52474	LC/MS Pos Late	100002875	1547	480.345		10917802	9093054			yes	40.7188	Yes
1-(1-enyl-palmitoyl)-GPE (P-16:0)*	Lipid	Lysoplasmalogen	39270	LC/MS Pos Late	100003000	1558	438.298			10471193			yes	41.1938	Yes
1-(1-enyl-stearoyl)-GPE (P-18:0)*	Lipid	Lysoplasmalogen	39271	LC/MS Polar	100003001	890	464.315						yes	50.5868	Yes
10-undecenoate (11:1n1)	Lipid	Medium Chain Fatty Acid	32497	LC/MS Neg	100001197	5085.8	183.139	1333-28-4		10771160			yes	60.1201	Yes
5-dodecenoate (12:1n7)	Lipid	Medium Chain Fatty Acid	33968	LC/MS Neg	100001232	5224	197.155	2430-94-6	5312378	4471803		HMDB00529	yes	69.5176	Yes
caprate (10:0)	Lipid	Medium Chain Fatty Acid	1642	LC/MS Neg	888	5090.7	171.139	112-37-8	2969	2863	C01571	HMDB00511	yes	79.8392	Yes
caproate (6:0)	Lipid	Medium Chain Fatty Acid	32489	LC/MS Neg	926	2713.7	115.076	142-62-1	8892	8552	C01585	HMDB00535	yes	47.8642	Yes
caprylate (8:0)	Lipid	Medium Chain Fatty Acid	32492	LC/MS Neg	932	4362	143.108	124-07-2	379	370	C06423	HMDB00482	yes	112.967	Yes
heptanoate (7:0)	Lipid	Medium Chain Fatty Acid	1644	LC/MS Neg	925	3670	129.092	111-14-8	8094	7803	C17714	HMDB00666	yes	81.6938	Yes
laurate (12:0)	Lipid	Medium Chain Fatty Acid	1645	LC/MS Neg	181	5300	199.17	143-07-7	3893	3756	C02679	HMDB00638	yes	74.7773	Yes
pelargonate (9:0)	Lipid	Medium Chain Fatty Acid	12035	LC/MS Neg	437	4798	157.123	112-05-0	8158	4574394	C01601	HMDB00847	yes	96.9917	No
3-hydroxy-3-methylglutarate	Lipid	Mevalonate Metabolism	531	LC/MS Polar	112	2700	161.046	503-49-1	1662	4573695	C03761	HMDB00355	yes	103.532	Yes
1-arachidonylglycerol (20:4)	Lipid	Monoacylglycerol	34397	LC/MS Neg	100001433	6450	303.233	35474-99-8	5282281	4445452	C13857	HMDB11572	yes	62.8517	Yes
1-dihomo-linolenylglycerol (20:3)	Lipid	Monoacylglycerol	48341	LC/MS Neg	100006121	6220	305.249						yes	78.3746	Yes
1-docosahexaenoylglycerol (22:6)	Lipid	Monoacylglycerol	35153	LC/MS Neg	100001481	6150	309.222			10477810		HMDB11587	no	98.0837	No
1-linolenoylglycerol (18:3)	Lipid	Monoacylglycerol	34393	LC/MS Neg	100001435	6214	277.217		53480978	21403134		HMDB11569	yes	82.7776	Yes
1-linoleoylglycerol (18:2)	Lipid	Monoacylglycerol	27447	LC/MS Neg	100001040	6477	279.233	2277-28-3	5283469	4446589			yes	83.489	Yes
1-myristoylglycerol (14:0)	Lipid	Monoacylglycerol	35625	LC/MS Neg	100001618	6353.3	227.202	75685-84-6	79050	71382	C01885	HMDB11561	yes	98.2996	No
1-oleoylglycerol (18:1)	Lipid	Monoacylglycerol	21184	LC/MS Neg	100000924	6500	281.249	111-03-5	5283468	4446588		HMDB11567	yes	112.173	No
1-palmitoleoylglycerol (16:1)*	Lipid	Monoacylglycerol	52431	LC/MS Neg	100008952	6094	253.217						yes	111.375	Yes
1-palmitoylglycerol (16:0)	Lipid	Monoacylglycerol	21127	LC/MS Neg	100000827	6400	255.233	542-44-9	14900	14201		HMDB31074	yes	118.957	Yes
2-arachidonoylglycerol (20:4)	Lipid	Monoacylglycerol	19266	LC/MS Neg	100000584	6170	303.233	53847-30-6	5282280	4445451	C13856	HMDB04666	no	57.5267	No
2-linoleoylglycerol (18:2)	Lipid	Monoacylglycerol	32506	LC/MS Neg	100000987	6250	279.233	3443-82-1	5365676	4517636		HMDB11538	yes	66.2306	Yes
2-oleoylglycerol (18:1)	Lipid	Monoacylglycerol	21232	LC/MS Neg	100000943	6300	281.249	3443-84-3	5319879	4478086			yes	118.017	No
2-palmitoleoylglycerol (16:1)*	Lipid	Monoacylglycerol	52432	LC/MS Neg	100008953	6016	253.217						no	84.2851	No
2-palmitoylglycerol (16:0)	Lipid	Monoacylglycerol	33419	LC/MS Neg	100001048	6300	255.233	23470-00-0	123409	110006		HMDB11533	no	130.473	No
1-stearoyl-2-arachidonoyl-GPS (18:0/20:4)	Lipid	Phosphatidylserine (PS)	48502	LC/MS Polar	100001872	888	810.529						no	#DIV/0!	Yes
1,2-dilinoleoyl-GPC (18:2/18:2)	Lipid	Phospholipid Metabolism	52603	LC/MS Pos Late	100008903	2006	782.569	998-06-1	5288075	4450312			yes	50.5085	Yes
1,2-dilinoleoyl-GPE (18:2/18:2)*	Lipid	Phospholipid Metabolism	53174	LC/MS Pos Late	100009217	2083	740.522		9546812	7825762			no	94.6819	No
1,2-dipalmitoyl-GPC (16:0/16:0)	Lipid	Phospholipid Metabolism	19130	LC/MS Pos Late	100000657	2365	734.569	63-89-8	452110	398235		HMDB00564	yes	26.0242	Yes
1,2-distearoyl-GPC (18:0/18:0)	Lipid	Phospholipid Metabolism	19132	LC/MS Pos Late	100000660	3066	790.632	816-94-4	94190	85004			yes	45.6454	No
1-linoleoyl-2-arachidonoyl-GPC (18:2/20:4n6)*	Lipid	Phospholipid Metabolism	52710	LC/MS Pos Late	100009131	1969	806.569			24766809			yes	38.0733	Yes
1-linoleoyl-2-linolenoyl-GPC (18:2/18:3)*	Lipid	Phospholipid Metabolism	53176	LC/MS Pos Late	100009343	1939	780.554			24766802			yes	61.8917	Yes
1-oleoyl-2-linoleoyl-GPC (18:1/18:2)*	Lipid	Phospholipid Metabolism	52453	LC/MS Pos Late	100008981	2165	784.585						yes	30.1944	No
1-oleoyl-2-linoleoyl-GPE (18:1/18:2)*	Lipid	Phospholipid Metabolism	52687	LC/MS Pos Late	100009078	2270	742.538		9546753	7825703		HMDB05349	yes	63.0482	No
1-palmitoleoyl-2-linoleoyl-GPC (16:1/18:2)*	Lipid	Phospholipid Metabolism	52683	LC/MS Pos Late	100009075	2003	756.554			24766675			yes	50.2878	No
1-palmitoyl-2-arachidonoyl-GPC (16:0/20:4)	Lipid	Phospholipid Metabolism	52462	LC/MS Pos Late	100008914	2091	782.569	35418-58-7	10747814	8923140			yes	24.7298	No
1-palmitoyl-2-arachidonoyl-GPE (16:0/20:4)*	Lipid	Phospholipid Metabolism	52464	LC/MS Pos Late	100008990	2198	740.522		9546800	7825750		HMDB05323	yes	52.339	Yes
1-palmitoyl-2-arachidonoyl-GPI (16:0/20:4)*	Lipid	Phospholipid Metabolism	52467	LC/MS Polar	100008993	892	857.519			24767674			yes	42.6748	Yes
1-palmitoyl-2-linolenoyl-GPC (16:0/18:3)*	Lipid	Phospholipid Metabolism	52684	LC/MS Pos Late	100009076	2034	756.554			24766646			yes	59.7022	No
1-palmitoyl-2-linoleoyl-GPC (16:0/18:2)	Lipid	Phospholipid Metabolism	42446	LC/MS Pos Late	1537	2160	758.569	40811-94-7	5287971	4450224			yes	20.6243	Yes
1-palmitoyl-2-linoleoyl-GPE (16:0/18:2)	Lipid	Phospholipid Metabolism	42449	LC/MS Pos Late	100001870	2275	716.522		9546747	7825697		HMDB05322	yes	57.2021	Yes
1-palmitoyl-2-linoleoyl-GPI (16:0/18:2)	Lipid	Phospholipid Metabolism	52450	LC/MS Polar	1528	910	833.518			21403024			yes	39.7887	Yes
1-palmitoyl-2-oleoyl-GPC (16:0/18:1)	Lipid	Phospholipid Metabolism	52461	LC/MS Pos Late	1539	2358	760.585	26853-31-6;26853-31-6	6436017	4940699			yes	25.9624	Yes
1-palmitoyl-2-oleoyl-GPE (16:0/18:1)	Lipid	Phospholipid Metabolism	19263	LC/MS Pos Late	1526	2509	718.538	26662-94-2	5283496	4446615		HMDB05320	yes	65.3116	Yes
1-palmitoyl-2-oleoyl-GPI (16:0/18:1)*	Lipid	Phospholipid Metabolism	52669	LC/MS Polar	100009066	893	835.534			24767668			yes	42.2169	Yes
1-palmitoyl-2-oleoyl-GPS (16:0/18:1)	Lipid	Phospholipid Metabolism	19261	LC/MS Pos Late	1531	2660	762.528	40290-44-6	5283499	4446618	C13880		no	#DIV/0!	No
1-palmitoyl-2-palmitoleoyl-GPC (16:0/16:1)*	Lipid	Phospholipid Metabolism	52470	LC/MS Pos Late	100008984	2160	732.554						yes	59.8069	Yes
1-palmitoyl-2-stearoyl-GPC (16:0/18:0)	Lipid	Phospholipid Metabolism	52616	LC/MS Pos Late	100008921	2653	762.601	59403-51-9		24766643			yes	33.9554	No
1-stearoyl-2-arachidonoyl-GPC (18:0/20:4)	Lipid	Phospholipid Metabolism	42450	LC/MS Pos Late	100001869	2300	810.601	35418-59-8	16219824	17347139			yes	27.9689	Yes
1-stearoyl-2-arachidonoyl-GPE (18:0/20:4)	Lipid	Phospholipid Metabolism	52447	LC/MS Pos Late	100008977	2424	768.554		5289133	4451158			yes	49.7005	Yes
1-stearoyl-2-arachidonoyl-GPI (18:0/20:4)	Lipid	Phospholipid Metabolism	52449	LC/MS Polar	100000616	870	885.549			21403055			yes	27.4839	Yes
1-stearoyl-2-linoleoyl-GPC (18:0/18:2)*	Lipid	Phospholipid Metabolism	52452	LC/MS Pos Late	100008980	2380	786.601						yes	22.5579	Yes
1-stearoyl-2-linoleoyl-GPE (18:0/18:2)*	Lipid	Phospholipid Metabolism	52446	LC/MS Pos Late	100008976	2522	744.554		9546749	7825699			yes	56.4449	Yes
1-stearoyl-2-linoleoyl-GPI (18:0/18:2)	Lipid	Phospholipid Metabolism	52468	LC/MS Polar	100008994	910	861.55			24767694			yes	31.5497	Yes
1-stearoyl-2-linoleoyl-GPS (18:0/18:2)	Lipid	Phospholipid Metabolism	53009	LC/MS Pos Late	100000642	2689	788.544		9547091	7826041			no	122.546	No
1-stearoyl-2-oleoyl-GPC (18:0/18:1)	Lipid	Phospholipid Metabolism	52438	LC/MS Pos Late	100008904	2644	788.616	56421-10-4		24766704			yes	41.355	Yes
1-stearoyl-2-oleoyl-GPE (18:0/18:1)	Lipid	Phospholipid Metabolism	42448	LC/MS Pos Late	100001856	2858	746.569						yes	67.2586	Yes
arachidonoylcholine	Lipid	Phospholipid Metabolism	53261	LC/MS Pos Late	100009332	1390	390.337						yes	82.381	Yes
choline	Lipid	Phospholipid Metabolism	15506	LC/MS Pos Early	1256	1961	104.107	67-48-1	305	149278	C00114	HMDB00097	yes	41.587	Yes
choline phosphate	Lipid	Phospholipid Metabolism	34396	LC/MS Pos Early	267	700	184.073	72556-74-2	1014	119298	C00588	HMDB01565	yes	58.4525	Yes
dihomo-linolenoyl-choline	Lipid	Phospholipid Metabolism	53262	LC/MS Pos Late	100009335	1424	392.352						yes	87.0138	Yes
docosahexaenoylcholine	Lipid	Phospholipid Metabolism	53263	LC/MS Pos Late	100009333	1378	414.337						yes	84.6756	Yes
eicosapentaenoylcholine	Lipid	Phospholipid Metabolism	53258	LC/MS Pos Late	100009336	1343	388.321						no	123.246	No
glycerophosphoethanolamine	Lipid	Phospholipid Metabolism	37455	LC/MS Pos Early	100001620	659	216.063	33049-08-0	123874	110410	C01233	HMDB00114	yes	39.5364	Yes
glycerophosphoinositol*	Lipid	Phospholipid Metabolism	52307	LC/MS Pos Early	100001621	516	335.074	16824-65-0					yes	99.8973	Yes
glycerophosphorylcholine (GPC)	Lipid	Phospholipid Metabolism	15990	LC/MS Pos Early	100000269	672	258.11	28319-77-9	71920	571409	C00670	HMDB00086	yes	54.667	Yes
oleoylcholine	Lipid	Phospholipid Metabolism	53260	LC/MS Pos Late	100009331	1449	368.352						yes	85.6568	Yes
palmitoloelycholine	Lipid	Phospholipid Metabolism	53257	LC/MS Pos Late	100009334	1385	340.321						no	75.4084	No
phosphoethanolamine	Lipid	Phospholipid Metabolism	1600	LC/MS Pos Early	1026	700	142.026	1071-23-4	1015	990	C00346	HMDB00224	no	169.463	Yes
trimethylamine N-oxide	Lipid	Phospholipid Metabolism	40406	LC/MS Pos Early	100003397	2100	76.0757	1184-78-7	1145	1113	C01104	HMDB00925	yes	144.552	Yes
1-(1-enyl-palmitoyl)-2-arachidonoyl-GPC (P-16:0/20:4)*	Lipid	Plasmalogen	52689	LC/MS Pos Late	100009014	2154	766.575			24767495			yes	30.4822	Yes
1-(1-enyl-palmitoyl)-2-arachidonoyl-GPE (P-16:0/20:4)*	Lipid	Plasmalogen	52673	LC/MS Pos Late	100009002	2270	724.528			24769238			yes	40.9419	Yes
1-(1-enyl-palmitoyl)-2-linoleoyl-GPC (P-16:0/18:2)*	Lipid	Plasmalogen	52682	LC/MS Pos Late	100009009	2226	742.575			24767486			yes	41.0954	Yes
1-(1-enyl-palmitoyl)-2-linoleoyl-GPE (P-16:0/18:2)*	Lipid	Plasmalogen	52677	LC/MS Pos Late	100009069	2351	700.528			24769229			yes	45.1635	Yes
1-(1-enyl-palmitoyl)-2-oleoyl-GPC (P-16:0/18:1)*	Lipid	Plasmalogen	52478	LC/MS Pos Late	100009007	2443	744.59						yes	36.8395	Yes
1-(1-enyl-palmitoyl)-2-oleoyl-GPE (P-16:0/18:1)*	Lipid	Plasmalogen	52477	LC/MS Pos Late	100009005	2600	702.543			24769228			yes	44.4067	Yes
1-(1-enyl-palmitoyl)-2-palmitoleoyl-GPC (P-16:0/16:1)*	Lipid	Plasmalogen	52713	LC/MS Pos Late	100009160	2218	716.559			24767482			yes	43.2868	Yes
1-(1-enyl-palmitoyl)-2-palmitoyl-GPC (P-16:0/16:0)*	Lipid	Plasmalogen	52716	LC/MS Pos Late	100009162	2454	718.575		11146967	9322076			yes	34.0594	Yes
1-(1-enyl-stearoyl)-2-arachidonoyl-GPE (P-18:0/20:4)*	Lipid	Plasmalogen	52475	LC/MS Pos Late	100008999	2511	752.559		9547058	7826008		HMDB05779	yes	42.0737	Yes
1-(1-enyl-stearoyl)-2-linoleoyl-GPE (P-18:0/18:2)*	Lipid	Plasmalogen	52748	LC/MS Pos Late	100009225	2633	728.559			24769261			yes	44.5474	Yes
1-(1-enyl-stearoyl)-2-oleoyl-GPE (P-18:0/18:1)	Lipid	Plasmalogen	52614	LC/MS Pos Late	100008919	2950	730.575	144371-68-6		24769260			yes	45.6415	Yes
adrenate (22:4n6)	Lipid	Polyunsaturated Fatty Acid (n3 and n6)	32980	LC/MS Neg	100001193	5678	331.264	2091-25-0	5497181	4445971	C16527	HMDB02226	yes	62.1003	Yes
arachidonate (20:4n6)	Lipid	Polyunsaturated Fatty Acid (n3 and n6)	1110	LC/MS Neg	229	5535	303.233	506-32-1	444899	392692	C00219	HMDB01043	yes	37.75	Yes
dihomo-linoleate (20:2n6)	Lipid	Polyunsaturated Fatty Acid (n3 and n6)	17805	LC/MS Neg	1231	5730	307.264	2091-39-6	6439848	4944228	C16525	HMDB05060	yes	64.0654	Yes
dihomo-linolenate (20:3n3 or n6)	Lipid	Polyunsaturated Fatty Acid (n3 and n6)	35718	LC/MS Neg	100001739	5596	305.249	17046-59-2	5280581	4471954	C03242	HMDB02925	yes	46.5565	Yes
docosadienoate (22:2n6)	Lipid	Polyunsaturated Fatty Acid (n3 and n6)	32415	LC/MS Neg	100001182	6034	335.296	7370-49-2	5282807	4445934	C16533	HMDB61714	yes	66.4104	Yes
docosahexaenoate (DHA; 22:6n3)	Lipid	Polyunsaturated Fatty Acid (n3 and n6)	44675	LC/MS Neg	100000665	5525	327.233	6217-54-5	445580	393183	C06429	HMDB02183	yes	57.1721	Yes
docosapentaenoate (n3 DPA; 22:5n3)	Lipid	Polyunsaturated Fatty Acid (n3 and n6)	32504	LC/MS Neg	100001181	5571	329.249	2234-74-4	6441454		C16513	HMDB01976	yes	70.2609	Yes
docosapentaenoate (n6 DPA; 22:5n6)	Lipid	Polyunsaturated Fatty Acid (n3 and n6)	37478	LC/MS Neg	100001580	5624.5	329.249	25182-74-5	6441454	4945614	C16513	HMDB01976	yes	47.0926	Yes
docosatrienoate (22:3n3)	Lipid	Polyunsaturated Fatty Acid (n3 and n6)	32417	LC/MS Neg	100001195	5823	333.28	59708-86-0	5312556	4471981	C16534	HMDB02823	yes	88.254	No
eicosapentaenoate (EPA; 20:5n3)	Lipid	Polyunsaturated Fatty Acid (n3 and n6)	18467	LC/MS Neg	2050	5450	301.217	10-2005-9;10417-94-4	446284	393682	C06428	HMDB01999	yes	126.066	Yes
linoleate (18:2n6)	Lipid	Polyunsaturated Fatty Acid (n3 and n6)	1105	LC/MS Neg	180	5535	279.233	60-33-3	5280450	4444105	C01595	HMDB00673	yes	52.1141	Yes
linolenate [alpha or gamma; (18:3n3 or 6)]	Lipid	Polyunsaturated Fatty Acid (n3 and n6)	34035	LC/MS Neg	100001337	5450	277.217		5280934	4444437	C06426	HMDB03073	yes	75.7312	Yes
mead acid (20:3n9)	Lipid	Polyunsaturated Fatty Acid (n3 and n6)	35174	LC/MS Neg	100001472	5650	305.249	20590-32-3	5312531	4471956		HMDB10378	no	63.4026	No
stearidonate (18:4n3)	Lipid	Polyunsaturated Fatty Acid (n3 and n6)	33969	LC/MS Neg	100001229	5395	275.202	111174-40-4	5312508	4471933	C16300	HMDB06547	yes	124.363	Yes
chenodeoxycholate	Lipid	Primary Bile Acid Metabolism	1563	LC/MS Neg	1123	5264	391.285	474-24-9;474-25-9	10133		C02528	HMDB00518	yes	162.681	No
cholate	Lipid	Primary Bile Acid Metabolism	22842	LC/MS Neg	136	5165	407.28	81-25-4	221493		C00695	HMDB00619	yes	316.343	Yes
glycochenodeoxycholate	Lipid	Primary Bile Acid Metabolism	32346	LC/MS Neg	1628	5236.1	448.307	16564-43-5	12544		C05466	HMDB00637	yes	203.255	Yes
glycochenodeoxycholate glucuronide (1)	Lipid	Primary Bile Acid Metabolism	52983	LC/MS Neg	100009264	4806	311.666						yes	159.892	Yes
glycochenodeoxycholate sulfate	Lipid	Primary Bile Acid Metabolism	52974	LC/MS Neg	100006641	4820	263.628						yes	393.796	No
glycocholate	Lipid	Primary Bile Acid Metabolism	18476	LC/MS Neg	342	5163	464.302	475-31-0;863-57-0	10140	9734	C01921	HMDB00138	yes	252.739	Yes
glycocholate glucuronide (1)	Lipid	Primary Bile Acid Metabolism	52977	LC/MS Neg	100009259	4533	640.334						no	135.454	No
tauro-beta-muricholate	Lipid	Primary Bile Acid Metabolism	33983	LC/MS Neg	100001250	4774	514.284	25696-60-0	168408	147312		HMDB00932	no	221.886	Yes
taurochenodeoxycholate	Lipid	Primary Bile Acid Metabolism	18494	LC/MS Neg	1629	5250	498.289	6009-98-9	387316	343282	C05465	HMDB00951	yes	757.326	Yes
taurocholate	Lipid	Primary Bile Acid Metabolism	18497	LC/MS Neg	1648	5150	514.284	145-42-6	6675		C05122	HMDB00036	yes	626.517	Yes
3b-hydroxy-5-cholenoic acid	Lipid	Secondary Bile Acid Metabolism	43507	LC/MS Neg	100004182	5205	373.275	5255-17-4	92997	83950		HMDB00308	no	99.9318	Yes
7-ketodeoxycholate	Lipid	Secondary Bile Acid Metabolism	31904	LC/MS Neg	100001063	4821	405.265	911-40-0	188292	163659		HMDB00391	no	212.895	No
deoxycholate	Lipid	Secondary Bile Acid Metabolism	1114	LC/MS Neg	302	5294	391.285	83-44-3	222528	389318	C04483	HMDB00626	yes	136.92	Yes
deoxycholic acid sulfate	Lipid	Secondary Bile Acid Metabolism	52969	LC/MS Neg	100006638	4880	235.117						no	114.544	No
glycocholenate sulfate*	Lipid	Secondary Bile Acid Metabolism	32599	LC/MS Neg	100001989	4750	254.623						yes	73.2631	Yes
glycodeoxycholate	Lipid	Secondary Bile Acid Metabolism	18477	LC/MS Neg	100000436	5281	448.307	360-65-6	3035026		C05464	HMDB00631	yes	119.533	Yes
glycodeoxycholate sulfate	Lipid	Secondary Bile Acid Metabolism	52975	LC/MS Neg	100006642	4875	263.628						yes	145.813	No
glycohyocholate	Lipid	Secondary Bile Acid Metabolism	42574	LC/MS Neg	100004083	5020	464.302						no	779.929	Yes
glycolithocholate	Lipid	Secondary Bile Acid Metabolism	31912	LC/MS Neg	100001064	5357.1	432.312	474-74-8	115245	103116	C15557	HMDB00698	no	116.498	Yes
glycolithocholate sulfate*	Lipid	Secondary Bile Acid Metabolism	32620	LC/MS Neg	100001657	5011	255.631	15324-64-8	72222	65188	C11301	HMDB02639	yes	107.164	Yes
glycoursodeoxycholate	Lipid	Secondary Bile Acid Metabolism	39379	LC/MS Neg	100002911	5033	448.307	64480-66-6	12310288	19973534		HMDB00708	yes	993.115	Yes
taurocholenate sulfate	Lipid	Secondary Bile Acid Metabolism	32807	LC/MS Neg	100001990	4750	279.614						yes	178.301	No
taurodeoxycholate	Lipid	Secondary Bile Acid Metabolism	12261	LC/MS Neg	1668	5257.4	498.289	207737-97-1	2733768	2015539	C05463	HMDB00896	yes	138.832	Yes
taurolithocholate	Lipid	Secondary Bile Acid Metabolism	31889	LC/MS Neg	100001065	5345	482.295	516-90-5	10595	10150	C02592	HMDB00722	no	88.7629	No
taurolithocholate 3-sulfate	Lipid	Secondary Bile Acid Metabolism	36850	LC/MS Neg	100001658	5026.7	280.622	64936-83-0	440071	389078	C03642	HMDB02580	yes	118.584	Yes
tauroursodeoxycholate	Lipid	Secondary Bile Acid Metabolism	39378	LC/MS Neg	100002912	5025	498.289	14605-22-2	9848818	24539842		HMDB00874	no	1515.81	No
ursodeoxycholate	Lipid	Secondary Bile Acid Metabolism	1605	LC/MS Neg	1135	5055	391.285	128-13-2	31401	29131	C07880	HMDB00946	yes	443.291	Yes
valerate	Lipid	Short Chain Fatty Acid	33443	LC/MS Neg	1136	1718	101.061	109-52-4	7991	7701	C00803	HMDB00892	no	85.6251	No
behenoyl sphingomyelin (d18:1/22:0)*	Lipid	Sphingolipid Metabolism	48492	LC/MS Pos Late	100006294	3083	787.669						yes	34.3673	Yes
glycosyl-N-palmitoyl-sphingosine	Lipid	Sphingolipid Metabolism	53013	LC/MS Pos Late	100009272	2623	700.572						yes	32.9774	No
glycosyl-N-stearoyl-sphingosine	Lipid	Sphingolipid Metabolism	52234	LC/MS Pos Late	100001882	3053	728.604						yes	38.1663	No
lactosyl-N-palmitoyl-sphingosine	Lipid	Sphingolipid Metabolism	53010	LC/MS Pos Late	100009030	2527	862.625	4201-62-1					yes	35.6232	No
N-palmitoyl-sphinganine (d18:0/16:0)	Lipid	Sphingolipid Metabolism	52604	LC/MS Pos Late	100009028	3090	540.535	5966-29-0	5283572	4446685		HMDB11760	yes	54.1053	Yes
N-palmitoyl-sphingosine (d18:1/16:0)	Lipid	Sphingolipid Metabolism	44877	LC/MS Pos Late	1518	2893	538.519	24696-26-2	5283564	4446677		HMDB04949	yes	32.6894	Yes
palmitoyl dihydrosphingomyelin (d18:0/16:0)*	Lipid	Sphingolipid Metabolism	52434	LC/MS Pos Late	100008954	2290	705.591		9939965	8115586			yes	32.6225	Yes
palmitoyl sphingomyelin (d18:1/16:0)	Lipid	Sphingolipid Metabolism	37506	LC/MS Pos Late	100002107	2168	703.575	6254-89-3	9939941	8115562			yes	19.1774	Yes
sphinganine	Lipid	Sphingolipid Metabolism	17769	LC/MS Pos Late	313	1413	302.305	3102-56-5	3126	3014	C00836	HMDB00269	yes	121.76	No
sphinganine-1-phosphate	Lipid	Sphingolipid Metabolism	52605	LC/MS Pos Late	100001876	1431	382.272	19794-97-9	520	505		HMDB01383	yes	41.3224	Yes
sphingomyelin (d18:1/14:0, d16:1/16:0)*	Lipid	Sphingolipid Metabolism	42463	LC/MS Pos Late	100004328	1998	675.544		11433862	9608732			yes	36.0844	Yes
sphingomyelin (d18:1/15:0, d16:1/17:0)*	Lipid	Sphingolipid Metabolism	52433	LC/MS Pos Late	100006314	2082	689.559	121999-58-4		28532779			yes	34.3822	No
sphingomyelin (d18:1/17:0, d17:1/18:0, d19:1/16:0)	Lipid	Sphingolipid Metabolism	52615	LC/MS Pos Late	100008920	2312	717.591	121999-64-2					yes	34.6069	Yes
sphingomyelin (d18:1/18:1, d18:2/18:0)	Lipid	Sphingolipid Metabolism	37529	LC/MS Pos Late	100002106	2167	729.591	108392-10-5	6443882	4947837			yes	29.7823	Yes
sphingomyelin (d18:1/20:0, d16:1/22:0)*	Lipid	Sphingolipid Metabolism	48490	LC/MS Pos Late	100006290	2685	759.638			23113477			yes	36.7542	Yes
sphingomyelin (d18:1/20:1, d18:2/20:0)*	Lipid	Sphingolipid Metabolism	48491	LC/MS Pos Late	100006292	2383	757.622	222403-67-0					yes	28.6659	Yes
sphingomyelin (d18:1/21:0, d17:1/22:0, d16:1/23:0)*	Lipid	Sphingolipid Metabolism	52495	LC/MS Pos Late	100009025	2793	773.653						yes	35.151	Yes
sphingomyelin (d18:1/22:1, d18:2/22:0, d16:1/24:1)*	Lipid	Sphingolipid Metabolism	48493	LC/MS Pos Late	100006295	2666	785.653			29368329			yes	34.081	Yes
sphingomyelin (d18:1/24:1, d18:2/24:0)*	Lipid	Sphingolipid Metabolism	47153	LC/MS Pos Late	100005986	3033	813.684	94359-13-4		24846874			yes	31.9362	Yes
sphingomyelin (d18:2/14:0, d18:1/14:1)*	Lipid	Sphingolipid Metabolism	47154	LC/MS Pos Late	100005985	1860	673.528						yes	42.732	Yes
sphingomyelin (d18:2/16:0, d18:1/16:1)*	Lipid	Sphingolipid Metabolism	42459	LC/MS Pos Late	100004329	2002	701.559						yes	32.6233	Yes
sphingomyelin (d18:2/23:0, d18:1/23:1, d17:1/24:1)*	Lipid	Sphingolipid Metabolism	52435	LC/MS Pos Late	100008956	2845	799.669						yes	31.5342	Yes
sphingomyelin (d18:2/24:1, d18:1/24:2)*	Lipid	Sphingolipid Metabolism	52437	LC/MS Pos Late	100008957	2635	811.669						yes	32.5857	Yes
sphingosine	Lipid	Sphingolipid Metabolism	17747	LC/MS Pos Late	297	1393	300.29	123-78-4	5353955	4510275	C00319	HMDB00252	yes	139.783	Yes
sphingosine 1-phosphate	Lipid	Sphingolipid Metabolism	34445	LC/MS Pos Late	100000626	1375	380.256	26993-30-6	5283560	4446673	C06124	HMDB00277	yes	31.5986	Yes
stearoyl sphingomyelin (d18:1/18:0)	Lipid	Sphingolipid Metabolism	19503	LC/MS Pos Late	1538	2400	731.606	85187-10-6;85187-10-6	6453725	4956085	C00550	HMDB01348	yes	29.8785	Yes
tricosanoyl sphingomyelin (d18:1/23:0)*	Lipid	Sphingolipid Metabolism	52436	LC/MS Pos Late	100008955	3330	801.684						yes	113.078	Yes
11-ketoetiocholanolone glucuronide	Lipid	Steroid	47135	LC/MS Neg	100005402	4280	479.229	17181-16-7					no	416.059	Yes
16a-hydroxy DHEA 3-sulfate	Lipid	Steroid	38168	LC/MS Neg	100002126	4240	383.153						yes	277.323	Yes
17alpha-hydroxypregnanolone glucuronide	Lipid	Steroid	47403	LC/MS Neg	100005418	5071.9	509.276						no	100.701	No
17alpha-hydroxypregnenolone sulfate	Lipid	Steroid	37482	LC/MS Neg	100002128	4800	411.185	28901-70-4	152971	134824		HMDB00416	no	323.785	No
21-hydroxypregnenolone disulfate	Lipid	Steroid	46115	LC/MS Neg	100001999	3935	245.067	1164-98-3	134595	118625	C05485	HMDB04026	yes	136.103	Yes
21-hydroxypregnenolone monosulfate (1)	Lipid	Steroid	37174	LC/MS Neg	100002003	4624	411.185	88378-34-1	174681	152343			no	77.4835	Yes
21-hydroxypregnenolone monosulfate (2)	Lipid	Steroid	37175	LC/MS Neg	100002004	4711	411.185		10670474	8845826			no	518.54	No
4-androsten-3alpha,17alpha-diol monosulfate (2)	Lipid	Steroid	37207	LC/MS Neg	100002026	4712	369.174						yes	66.9565	No
4-androsten-3alpha,17alpha-diol monosulfate (3)	Lipid	Steroid	37209	LC/MS Neg	100002027	5180	369.174						yes	75.2602	No
4-androsten-3beta,17beta-diol disulfate (1)	Lipid	Steroid	37202	LC/MS Neg	100001992	3740	224.062		10634		C04295	HMDB03818	yes	108.572	No
4-androsten-3beta,17beta-diol disulfate (2)	Lipid	Steroid	37203	LC/MS Neg	100001994	4065	224.062		10634		C04295	HMDB03818	yes	71.4682	No
4-androsten-3beta,17beta-diol monosulfate (1)	Lipid	Steroid	37211	LC/MS Neg	100002028	4500	369.174	521-17-5				HMDB03818	yes	80.7978	No
4-androsten-3beta,17beta-diol monosulfate (2)	Lipid	Steroid	37210	LC/MS Neg	100002029	4500	369.174						yes	76.5117	No
5alpha-androstan-3alpha, 17beta-diol-17-glucosiduronate	Lipid	Steroid	47132	LC/MS Neg	100005396	4930	467.265						no	99.4548	No
5alpha-androstan-3alpha,17alpha-diol disulfate	Lipid	Steroid	37182	LC/MS Neg	100002007	4547	225.07						no	85.9297	No
5alpha-androstan-3alpha,17beta-diol disulfate	Lipid	Steroid	37184	LC/MS Neg	100002017	4275	225.07						no	131.895	Yes
5alpha-androstan-3alpha,17beta-diol monosulfate (1)	Lipid	Steroid	37186	LC/MS Neg	100002018	4925	371.19						yes	92.1134	Yes
5alpha-androstan-3alpha,17beta-diol monosulfate (2)	Lipid	Steroid	37185	LC/MS Neg	100006005	5080	371.19						no	138.422	No
5alpha-androstan-3beta,17alpha-diol disulfate	Lipid	Steroid	37187	LC/MS Neg	100002021	4215	225.07						yes	141.961	Yes
5alpha-androstan-3beta,17beta-diol disulfate	Lipid	Steroid	37190	LC/MS Neg	100001987	3880	225.07	571-20-0	242332		C12525	HMDB00493	yes	113.591	Yes
5alpha-androstan-3beta,17beta-diol monosulfate (2)	Lipid	Steroid	37192	LC/MS Neg	100002024	4685	371.19						no	80.548	Yes
5alpha-pregnan-3(alpha or beta),20beta-diol disulfate	Lipid	Steroid	46172	LC/MS Neg	100002015	4310	239.085		5127902	4302261			no	228.336	No
5alpha-pregnan-3beta,20alpha-diol disulfate	Lipid	Steroid	37198	LC/MS Neg	100001988	3962	239.085						yes	199.081	Yes
5alpha-pregnan-3beta,20alpha-diol monosulfate (2)	Lipid	Steroid	37200	LC/MS Neg	100002014	5060	399.221						yes	194.854	Yes
5alpha-pregnan-3beta,20beta-diol monosulfate (1)	Lipid	Steroid	37196	LC/MS Neg	100002009	5180	399.221						yes	233.034	Yes
andro steroid monosulfate (1)*	Lipid	Steroid	32827	LC/MS Neg	100002152	3871	383.153				C04555	HMDB02759	yes	451.518	No
androsterone sulfate	Lipid	Steroid	31591	LC/MS Neg	100001073	5022	369.174	2479-86-9	159663	19988780		HMDB02759	yes	87.4827	Yes
corticosterone	Lipid	Steroid	5983	LC/MS Neg	272	5040	345.207	50-22-6	5753	5550	C02140	HMDB01547	no	85.695	No
cortisol	Lipid	Steroid	1712	LC/MS Neg	356	4713.2	361.202	50-23-7	5754		C00735	HMDB00063	yes	48.9637	Yes
cortisone	Lipid	Steroid	1769	LC/MS Neg	273	4572.5	359.186	53-06-5	222786	361685	C00762	HMDB02802	yes	42.0951	Yes
dehydroisoandrosterone sulfate (DHEA-S)	Lipid	Steroid	32425	LC/MS Neg	100000792	4745	367.158	651-48-9	12594	12074	C04555	HMDB01032	yes	71.774	No
epiandrosterone sulfate	Lipid	Steroid	33973	LC/MS Neg	100001287	4855	369.174	22229-22-7		21403101	C07635	HMDB00365	yes	83.0797	Yes
estrone 3-sulfate	Lipid	Steroid	18474	LC/MS Neg	1230	4417.3	349.112	438-67-5	3001028	16740220	C02538	HMDB01425	no	233.372	No
etiocholanolone glucuronide	Lipid	Steroid	47112	LC/MS Neg	100005403	4915	465.249	3602-09-3					yes	233.485	Yes
pregn steroid monosulfate*	Lipid	Steroid	32619	LC/MS Neg	100002067	5000	397.205	1247-64-9		13465233			yes	74.5293	No
pregnanediol-3-glucuronide	Lipid	Steroid	40708	LC/MS Neg	100003470	5145	495.296	1852-49-9	123796	110346			yes	182.17	Yes
pregnanolone/allopregnanolone sulfate	Lipid	Steroid	48394	LC/MS Neg	100006173	5160	397.205						no	204.784	Yes
pregnen-diol disulfate*	Lipid	Steroid	32562	LC/MS Neg	100001993	3868	238.077						yes	81.7627	No
pregnenolone sulfate	Lipid	Steroid	38170	LC/MS Neg	100002129	5100	395.19	1247-64-9	105074	94802		HMDB00774	yes	117.019	Yes
testosterone sulfate	Lipid	Steroid	35668	LC/MS Neg	100001548	4600	367.158	651-45-6	119207	19979647	C00535	HMDB02833	no	172.576	No
4-cholesten-3-one	Lipid	Sterol	38125	LC/MS Pos Late	100002227	2520	385.346	601-57-0	91477	427	C00599	HMDB00921	yes	37.5734	No
7-alpha-hydroxy-3-oxo-4-cholestenoate (7-Hoca)	Lipid	Sterol	36776	LC/MS Neg	100001609	5288.1	429.301	115538-85-7	3081085	2338765	C17337	HMDB12458	yes	44.0861	Yes
7-hydroxycholesterol (alpha or beta)	Lipid	Sterol	47890	LC/MS Pos Late	100005999	1930	367.336						no	77.5704	No
beta-sitosterol	Lipid	Sterol	27414	LC/MS Pos Late	100001033	3054	397.383	83-46-5	222284	192962	C01753	HMDB00852	no	423.515	Yes
campesterol	Lipid	Sterol	33997	LC/MS Pos Late	100001269	2873	383.367	474-62-4	173183	151215	C01789	HMDB02869	no	174.382	No
cholesterol	Lipid	Sterol	63	LC/MS Pos Late	266	2707	369.352	57-88-5	11025495	4937803	C00187	HMDB00067	yes	31.0486	Yes
2'-deoxyinosine	Nucleotide	Purine Metabolism, (Hypo)Xanthine/Inosine containing	15076	LC/MS Neg	100000135	1688	251.079	890-38-0	65058	58569	C05512	HMDB00071	no	248.161	No
allantoic acid	Nucleotide	Purine Metabolism, (Hypo)Xanthine/Inosine containing	33434	LC/MS Polar	218	2960	175.047	99-16-1	203	198	C00499	HMDB01209	no	218.632	No
allantoin	Nucleotide	Purine Metabolism, (Hypo)Xanthine/Inosine containing	1107	LC/MS Polar	1002	1672	157.037	97-59-6	204	199	C02350	HMDB00462	yes	50.5936	Yes
hypoxanthine	Nucleotide	Purine Metabolism, (Hypo)Xanthine/Inosine containing	3127	LC/MS Polar	171	1515.8	135.031	68-94-0	790	768	C00262	HMDB00157	yes	153.843	Yes
inosine	Nucleotide	Purine Metabolism, (Hypo)Xanthine/Inosine containing	1123	LC/MS Neg	361	1602.1	267.073	58-63-9	6021	21241953	C00294	HMDB00195	yes	216.076	Yes
inosine 5'-diphosphate	Nucleotide	Purine Metabolism, (Hypo)Xanthine/Inosine containing	42624	LC/MS Neg	359	620	427.006	54735-61-4	6831	6570	C00104	HMDB03335	no	#DIV/0!	No
inosine 5'-monophosphate (IMP)	Nucleotide	Purine Metabolism, (Hypo)Xanthine/Inosine containing	2133	LC/MS Pos Early	362	650	349.054	4691-65-0	8582	5482599	C00130	HMDB00175	no	#DIV/0!	No
N1-methylinosine	Nucleotide	Purine Metabolism, (Hypo)Xanthine/Inosine containing	48351	LC/MS Pos Early	100001409	1430	283.104	20245-33-4	65095	513976		HMDB02721	yes	154.709	Yes
urate	Nucleotide	Purine Metabolism, (Hypo)Xanthine/Inosine containing	1604	LC/MS Neg	1134	757.1	167.021	69-93-2;120K5305	1175		C00366	HMDB00289	yes	28.6979	Yes
xanthine	Nucleotide	Purine Metabolism, (Hypo)Xanthine/Inosine containing	3147	LC/MS Neg	1004	910	151.026	69-89-6	1188	1151	C00385	HMDB00292	yes	41.3879	Yes
xanthosine	Nucleotide	Purine Metabolism, (Hypo)Xanthine/Inosine containing	15136	LC/MS Neg	100000299	1075.3	283.068	146-80-5	64959	58484	C01762	HMDB00299	no	206.617	No
adenine	Nucleotide	Purine Metabolism, Adenine containing	554	LC/MS Pos Early	880	2221	136.062	73-24-5	190	185	C00147	HMDB00034	yes	51.7975	Yes
adenosine	Nucleotide	Purine Metabolism, Adenine containing	555	LC/MS Pos Early	798	2169	268.104	58-61-7	60961	54923	C00212	HMDB00050	no	109.642	No
adenosine 2'-monophosphate (2'-AMP)	Nucleotide	Purine Metabolism, Adenine containing	36815	LC/MS Neg	100001694	1497.7	346.056	130-49-4	94136		C00946	HMDB11617	no	#DIV/0!	No
adenosine 3'-monophosphate (3'-AMP)	Nucleotide	Purine Metabolism, Adenine containing	35142	LC/MS Neg	100001449	1245	346.056	84-21-9	41211	10463793	C01367	HMDB03540	no	#DIV/0!	No
adenosine 5'-monophosphate (AMP)	Nucleotide	Purine Metabolism, Adenine containing	32342	LC/MS Pos Early	209	1013	348.07	149022-20-8	6083	10239183	C00020	HMDB00045	no	175.366	Yes
N1-methyladenosine	Nucleotide	Purine Metabolism, Adenine containing	15650	LC/MS Pos Early	1242	2120	282.12	15763-06-1	27476	4573813	C02494	HMDB03331	yes	32.3039	Yes
N6-carbamoylthreonyladenosine	Nucleotide	Purine Metabolism, Adenine containing	35157	LC/MS Neg	100001415	2164	411.127	24719-82-2	161466	141829		HMDB41623	yes	137.608	Yes
N6-methyladenosine	Nucleotide	Purine Metabolism, Adenine containing	37114	LC/MS Pos Early	213	2264	282.12	1867-73-8	102175	92307		HMDB04044	no	63.6227	Yes
N6-succinyladenosine	Nucleotide	Purine Metabolism, Adenine containing	48130	LC/MS Neg	100001664	980	382.1	4542-23-8				HMDB00912	yes	103.629	Yes
7-methylguanine	Nucleotide	Purine Metabolism, Guanine containing	35114	LC/MS Pos Early	100001456	2175	166.072	578-76-7	11361	10883	C02242	HMDB00897	yes	36.3374	Yes
guanosine	Nucleotide	Purine Metabolism, Guanine containing	1573	LC/MS Neg	1099	1662	282.084	118-00-3	6802	6544	C00387	HMDB00133	yes	129.885	No
N2,N2-dimethylguanosine	Nucleotide	Purine Metabolism, Guanine containing	35137	LC/MS Pos Early	100001412	2210	312.13	2140-67-2	92919	83878		HMDB04824	yes	149.367	Yes
cytidine	Nucleotide	Pyrimidine Metabolism, Cytidine containing	514	LC/MS Neg	827	1325	242.078	65-46-3	6175	5940	C00475	HMDB00089	yes	75.5379	Yes
dihydroorotate	Nucleotide	Pyrimidine Metabolism, Orotate containing	601	LC/MS Polar	923	1910.1	157.025	155-54-4	648	628	C00337	HMDB03349	yes	76.7439	No
orotate	Nucleotide	Pyrimidine Metabolism, Orotate containing	1505	LC/MS Polar	445	1638.1	155.01	50887-69-9	967	942	C00295	HMDB00226	yes	122.823	Yes
orotidine	Nucleotide	Pyrimidine Metabolism, Orotate containing	35172	LC/MS Polar	100001416	2250	287.052	314-50-1	92751	83729	C01103	HMDB00788	yes	607.855	Yes
3-aminoisobutyrate	Nucleotide	Pyrimidine Metabolism, Thymine containing	1566	LC/MS Pos Early	1114	2215	104.071	10569-72-9;214139-20-5	64956	58481	C05145	HMDB03911	yes	100.036	Yes
5,6-dihydrothymine	Nucleotide	Pyrimidine Metabolism, Thymine containing	1418	LC/MS Neg	158	1637.8	127.051	696-04-8	93556	84456	C00906	HMDB00079	yes	45.8933	Yes
2'-deoxyuridine	Nucleotide	Pyrimidine Metabolism, Uracil containing	52602	LC/MS Neg	536	1586	227.067	951-78-0	13712	13118	C00526	HMDB00012	yes	58.9784	Yes
3-ureidopropionate	Nucleotide	Pyrimidine Metabolism, Uracil containing	3155	LC/MS Pos Early	1053	875	133.061	462-88-4	111	109	C02642	HMDB00026	yes	61.0952	Yes
4-ureidobutyrate	Nucleotide	Pyrimidine Metabolism, Uracil containing	22118	LC/MS Pos Early	100000718	1095	147.076	2609-10-01	1571307	1278628			no	74.2191	No
5,6-dihydrouracil	Nucleotide	Pyrimidine Metabolism, Uracil containing	1559	LC/MS Neg	1125	1120	113.036	504-07-4	649	629	C00429	HMDB00076	no	65.875	Yes
5-methyluridine (ribothymidine)	Nucleotide	Pyrimidine Metabolism, Uracil containing	35136	LC/MS Neg	100001446	1778.1	257.078	1463-10-1	445408	393058		HMDB00884	yes	28.0926	Yes
beta-alanine	Nucleotide	Pyrimidine Metabolism, Uracil containing	55	LC/MS Pos Early	244	1939	90.055	56-41-7;107-95-9	239	234	C00099	HMDB00056	yes	55.2729	Yes
N-acetyl-beta-alanine	Nucleotide	Pyrimidine Metabolism, Uracil containing	37432	LC/MS Neg	100002102	773	130.051	3025-95-4	76406	68881	C01073		yes	47.8739	Yes
pseudouridine	Nucleotide	Pyrimidine Metabolism, Uracil containing	33442	LC/MS Neg	821	1100	243.062	1445-07-4	15047	21403010	C02067	HMDB00767	yes	69.6726	Yes
uracil	Nucleotide	Pyrimidine Metabolism, Uracil containing	605	LC/MS Polar	825	1089.7	111.02	66-22-8	1174	1141	C00106	HMDB00300	yes	182.841	Yes
uridine	Nucleotide	Pyrimidine Metabolism, Uracil containing	606	LC/MS Neg	535	1457.6	243.062	58-96-8	6029	5807	C00299	HMDB00296	yes	28.6944	Yes
alanylleucine	Peptide	Dipeptide	37093	LC/MS Pos Early	100001890	3055	203.139	1638-60-4	259583	227831		HMDB28691	no	160.517	No
glutamine-leucine	Peptide	Dipeptide	42994	LC/MS Pos Early	100003160	3009	260.16			16568303			no	299.216	No
glycylvaline	Peptide	Dipeptide	18357	LC/MS Neg	100000487	1371.1	173.093	1963-21-9	97417	2006926		HMDB28854	yes	189.124	No
histidylalanine	Peptide	Dipeptide	42027	LC/MS Neg	100003542	970	225.099	16874-75-2	351667	312232			yes	127.685	No
isoleucylglycine	Peptide	Dipeptide	40008	LC/MS Pos Early	100003169	2719	189.123	868-28-0	342532	303621			no	166.588	No
leucylalanine	Peptide	Dipeptide	40010	LC/MS Pos Early	100003179	2801	203.139	7298-84-2	259321	227625			yes	119.071	No
leucylglutamine*	Peptide	Dipeptide	48189	LC/MS Pos Early	100003183	2620	260.161		4305457	3511125			no	212.07	No
leucylglycine	Peptide	Dipeptide	40045	LC/MS Pos Early	100003185	2778	189.123	686-50-0	79070	71402			no	230.031	No
lysylleucine	Peptide	Dipeptide	40020	LC/MS Pos Early	100003196	3370	260.197	7369-79-1	4682588	3870665			no	278.872	No
phenylalanylalanine	Peptide	Dipeptide	41374	LC/MS Pos Early	100003589	2909	237.123	3918-87-4	6993123;5488196	4589716			no	168.518	No
phenylalanylglycine	Peptide	Dipeptide	41370	LC/MS Pos Early	100003588	2898	223.108	721-90-4	98207	88678			yes	52.4149	No
prolylglycine	Peptide	Dipeptide	40703	LC/MS Pos Early	100003674	2136	173.092	2578-57-6	7408076;6426709	4932143			yes	96.9611	Yes
threonylphenylalanine	Peptide	Dipeptide	31530	LC/MS Neg	100001125	2322	265.119	16875-27-7	4099799;4099798	3313819			yes	103.951	No
valylglutamine	Peptide	Dipeptide	42079	LC/MS Pos Early	100003640	2295	246.145	42854-54-6	5253209	4419671			no	196.536	No
valylglycine	Peptide	Dipeptide	40475	LC/MS Neg	100003641	1506	173.093	686-43-1	136487	120256			no	83.9601	No
valylleucine	Peptide	Dipeptide	39994	LC/MS Pos Early	100003210	3138	231.17	22906-55-4	352039	312586			no	395.348	No
carnosine	Peptide	Dipeptide Derivative	1768	LC/MS Pos Early	249	2942	227.114	305-84-0	439224	388363	C00386	HMDB00033	no	308.055	No
N-acetylcarnosine	Peptide	Dipeptide Derivative	43488	LC/MS Polar	100004046	2287	267.11	56353-15-2	9903482	8079136		HMDB12881	yes	81.494	Yes
ADSGEGDFXAEGGGVR*	Peptide	Fibrinogen Cleavage Peptide	33084	LC/MS Pos Late	100001322	800	768.85		16133137	14654187			no	81.2926	No
DSGEGDFXAEGGGVR*	Peptide	Fibrinogen Cleavage Peptide	31548	LC/MS Neg	100001323	2535	731.317			21403111			yes	75.2452	No
gamma-glutamyl-2-aminobutyrate	Peptide	Gamma-glutamyl Amino Acid	37092	LC/MS Pos Early	100001502	2380	233.113			21403151			yes	57.1293	Yes
gamma-glutamylalanine	Peptide	Gamma-glutamyl Amino Acid	37063	LC/MS Pos Early	100001843	1986	219.098	5875-41-2	440103	389104		HMDB29142	yes	46.0481	Yes
gamma-glutamyl-epsilon-lysine	Peptide	Gamma-glutamyl Amino Acid	33934	LC/MS Pos Early	100001262	2717	276.155	17105-15-6	65254;14284565	58747		HMDB03869	yes	50.6265	Yes
gamma-glutamylglutamate	Peptide	Gamma-glutamyl Amino Acid	36738	LC/MS Pos Early	331	1775	277.103	1116-22-9	92865	83831	C05282	HMDB11737	yes	97.182	Yes
gamma-glutamylglutamine	Peptide	Gamma-glutamyl Amino Acid	2730	LC/MS Pos Early	1140	1430	276.119	10148-81-9	150914	133013	C05283	HMDB11738	yes	40.5793	Yes
gamma-glutamylglycine	Peptide	Gamma-glutamyl Amino Acid	33949	LC/MS Pos Early	100001294	1535	205.082	1948-29-4	165527	145071		HMDB11667	yes	56.8722	Yes
gamma-glutamylhistidine	Peptide	Gamma-glutamyl Amino Acid	18245	LC/MS Pos Early	1235	2740	285.119	37460-15-4	7017195	5380197			yes	41.868	Yes
gamma-glutamylisoleucine*	Peptide	Gamma-glutamyl Amino Acid	34457	LC/MS Neg	100001485	1635	259.13		14253342	21403145		HMDB11170	yes	53.4264	Yes
gamma-glutamylleucine	Peptide	Gamma-glutamyl Amino Acid	18369	LC/MS Neg	1268	1685	259.13	2566-39-4	151023	133115		HMDB11171	yes	42.4782	Yes
gamma-glutamylmethionine	Peptide	Gamma-glutamyl Amino Acid	44872	LC/MS Pos Early	100001313	2640	279.101	17663-87-5	7009567	5373147		HMDB29155	yes	50.4987	Yes
gamma-glutamylphenylalanine	Peptide	Gamma-glutamyl Amino Acid	33422	LC/MS Neg	100000491	1825	293.114	7432-24-8	111299	99868		HMDB00594	yes	53.5673	Yes
gamma-glutamylthreonine*	Peptide	Gamma-glutamyl Amino Acid	33364	LC/MS Pos Early	100001314	1750	249.108	5652-48-2		21403107		HMDB29159	yes	48.2456	No
gamma-glutamyltryptophan	Peptide	Gamma-glutamyl Amino Acid	33947	LC/MS Neg	100001295	1960	332.125	66471-20-3	3989307	2302065		HMDB29160	no	40.1772	Yes
gamma-glutamyltyrosine	Peptide	Gamma-glutamyl Amino Acid	2734	LC/MS Neg	1102	1240	309.109	7432-23-7	94340	85142		HMDB11741	yes	45.6395	Yes
gamma-glutamylvaline	Peptide	Gamma-glutamyl Amino Acid	43829	LC/MS Pos Early	100001126	2700	247.129	2746-34-1	7015683			HMDB11172	yes	45.8964	Yes
bradykinin, des-arg(9)	Peptide	Polypeptide	34420	LC/MS Pos Late	100001292	810	452.737	15958-92-6	105044	94778	C00306	HMDB04246	no	138.285	No
HWESASXX*	Peptide	Polypeptide	32836	LC/MS Pos Late	100001327	810	471.738			21403115			yes	133.615	Yes
tartronate (hydroxymalonate)	Xenobiotics	Bacterial/Fungal	20693	LC/MS Neg	100000840	610	118.999	80-69-3	45	44	C02287	HMDB35227	yes	57.8649	Yes
2-ethylphenylsulfate	Xenobiotics	Benzoate Metabolism	36847	LC/MS Neg	100001809	3416	201.023						no	147.838	No
2-hydroxyhippurate (salicylurate)	Xenobiotics	Benzoate Metabolism	18281	LC/MS Neg	1869	2184	194.046	487-54-7	10253	9835	C07588	HMDB00840	yes	354.894	Yes
3-ethylphenylsulfate	Xenobiotics	Benzoate Metabolism	36848	LC/MS Neg	100001808	3530	201.023				C14386		no	91.5932	No
3-hydroxyhippurate	Xenobiotics	Benzoate Metabolism	39600	LC/MS Neg	100002122	1687	194.046	1637-75-8	450268	396603		HMDB06116	yes	250.081	Yes
3-methoxybenzenepropanoic acid	Xenobiotics	Benzoate Metabolism	43401	LC/MS Neg	100004296	3036	179.071	10516-71-9	66336	59714			no	259.286	No
3-methoxycatechol sulfate (1)	Xenobiotics	Benzoate Metabolism	48763	LC/MS Neg	100006375	2163	218.997						no	112.543	Yes
3-methoxycatechol sulfate (2)	Xenobiotics	Benzoate Metabolism	48752	LC/MS Neg	100006376	2200	218.997						yes	161.048	No
3-methyl catechol sulfate (1)	Xenobiotics	Benzoate Metabolism	46165	LC/MS Neg	100004112	2790	203.002						yes	182.65	Yes
3-methyl catechol sulfate (2)	Xenobiotics	Benzoate Metabolism	46164	LC/MS Neg	100004110	2860	203.002						no	156.724	No
4-ethylphenylsulfate	Xenobiotics	Benzoate Metabolism	36099	LC/MS Neg	100001756	3580	201.023	123-07-9			C13637		yes	146.378	Yes
4-hydroxybenzoate	Xenobiotics	Benzoate Metabolism	21133	LC/MS Neg	100000862	820	137.024	99-96-7	135	132	C00156	HMDB00500	no	119.647	No
4-hydroxyhippurate	Xenobiotics	Benzoate Metabolism	35527	LC/MS Neg	100001423	1475	194.046	2482-25-9	151012	133104		HMDB13678	yes	261.13	Yes
4-methylcatechol sulfate	Xenobiotics	Benzoate Metabolism	46146	LC/MS Neg	100004111	2665	203.002						yes	103.834	Yes
4-vinylphenol sulfate	Xenobiotics	Benzoate Metabolism	36098	LC/MS Neg	100001755	3320	199.007	2628-17-3	6426766	4932200	C05627	HMDB04072	yes	164.248	Yes
benzoate	Xenobiotics	Benzoate Metabolism	15778	LC/MS Neg	100000008	1750	121.029	65-85-0	243	238	C00180	HMDB01870	yes	105.344	Yes
catechol sulfate	Xenobiotics	Benzoate Metabolism	35320	LC/MS Neg	100001605	1906	188.986	4918-96-1	3083879	2341024	C00090	HMDB59724	yes	90.1454	Yes
hippurate	Xenobiotics	Benzoate Metabolism	15753	LC/MS Neg	100000014	2106.9	178.051	495-69-2	464	451	C01586	HMDB00714	yes	186.004	Yes
methyl-4-hydroxybenzoate sulfate	Xenobiotics	Benzoate Metabolism	48429	LC/MS Neg	100006116	2873	230.997						yes	538.797	Yes
O-methylcatechol sulfate	Xenobiotics	Benzoate Metabolism	46111	LC/MS Neg	100004208	2344	203.002		22473	21078			yes	196.793	No
propyl 4-hydroxybenzoate	Xenobiotics	Benzoate Metabolism	48480	LC/MS Neg	100006205	4794	179.071	94-13-3	7175	6907	D02459	HMDB32574	no	52.4878	No
propyl 4-hydroxybenzoate sulfate	Xenobiotics	Benzoate Metabolism	48460	LC/MS Neg	100006264	3971	259.028	162338-10-5					no	130.269	No
1,2,3-benzenetriol sulfate (1)	Xenobiotics	Chemical	48761	LC/MS Neg	100006373	1453	204.981						no	134.91	No
1,2,3-benzenetriol sulfate (2)	Xenobiotics	Chemical	48762	LC/MS Neg	100006374	1709	204.981						yes	284.107	No
2-aminophenol sulfate	Xenobiotics	Chemical	43266	LC/MS Neg	100004322	1677	188.002		181670	158022		HMDB61116	yes	125.824	Yes
2-methoxyresorcinol sulfate	Xenobiotics	Chemical	48445	LC/MS Neg	100006184	1863	218.997	1446269-78-8					no	181.058	No
2-pyrrolidinone	Xenobiotics	Chemical	31675	LC/MS Pos Early	100001081	1262	86.06	616-45-5	12025	11530		HMDB02039	yes	59.946	No
3-hydroxypyridine sulfate	Xenobiotics	Chemical	48448	LC/MS Neg	100006098	1595.5	173.987	1955-23-3		16232314			yes	232.577	Yes
4-hydroxychlorothalonil	Xenobiotics	Chemical	48441	LC/MS Neg	100006082	4427	244.908	28343-61-5	34217	31530			yes	69.0723	Yes
6-hydroxyindole sulfate	Xenobiotics	Chemical	48698	LC/MS Neg	100006260	2498	212.002						yes	158.674	Yes
benzoylcarnitine*	Xenobiotics	Chemical	43265	LC/MS Pos Early	100004555	3041	266.139	105450-08-6					no	90.6066	No
dexpanthenol	Xenobiotics	Chemical	38314	LC/MS Neg	100002376	2259.1	204.124	16485-10-2	4678	4516	D03726	HMDB04231	no	#DIV/0!	No
dimethyl sulfone	Xenobiotics	Chemical	43424	LC/MS Pos Early	100004284	832	95.0161	67-71-0	6213	5978	C11142	HMDB04983	no	317.536	Yes
EDTA	Xenobiotics	Chemical	22163	LC/MS Pos Early	100001002	875	293.098	60-00-4	6049	5826	C00284	HMDB15109	no	#DIV/0!	Yes
ethyl glucuronide	Xenobiotics	Chemical	39603	LC/MS Neg	100002849	793	221.067	17685-04-0	152226	134174			no	240.803	No
gentisic acid-5-glucoside	Xenobiotics	Chemical	48729	LC/MS Neg	100006372	1434	315.072	1820-89-9	10914066	9089323			no	229.331	No
heptaethylene glycol	Xenobiotics	Chemical	38154	LC/MS Pos Early	100002318	2163	327.201	5617-32-3	79718	72017			no	41.6157	No
hexaethylene glycol	Xenobiotics	Chemical	38133	LC/MS Pos Early	100002317	2029	283.175	2615-15-8	17472	16521			no	44.8412	No
lanthionine	Xenobiotics	Chemical	42002	LC/MS Pos Early	100003892	1730	209.059	3183-08-2	6994972;98504	88959			yes	161.724	Yes
N-methylpipecolate	Xenobiotics	Chemical	47101	LC/MS Pos Early	100005383	1932	144.102	41447-17-0	11862129;11286529	9461516			yes	115.189	Yes
nornicotine	Xenobiotics	Chemical	38122	LC/MS Pos Early	100002224	2947	149.107	5746-86-1		21108497			no	58.1146	No
O-sulfo-L-tyrosine	Xenobiotics	Chemical	45413	LC/MS Neg	100005384	990	260.023		514186	448617			yes	86.4198	Yes
S-(3-hydroxypropyl)mercapturic acid (HPMA)	Xenobiotics	Chemical	44552	LC/MS Neg	100004568	1576	220.065	23127-40-4	3371179	2616726			no	75.6561	No
sulfate*	Xenobiotics	Chemical	46960	LC/MS Neg	100002528	616	96.9601	14808-79-8	1118	1086	C00059	HMDB01448	yes	35.4158	Yes
trizma acetate	Xenobiotics	Chemical	20710	LC/MS Pos Early	100000856	1884	122.081	6850-28-8	6503	73346	C07182		no	12.3168	No
1-hydroxy-2-naphthalenecarboxylate	Xenobiotics	Drug	38140	LC/MS Neg	100002394	3930	187.04	86-48-6	6844	6583	C03203		no	233.604	No
2-acetamidophenol sulfate	Xenobiotics	Drug	48580	LC/MS Neg	100006190	2251	230.013	40712-60-5	181671	158023			no	140.346	No
2-hydroxyacetaminophen sulfate*	Xenobiotics	Drug	33173	LC/MS Neg	100001791	1674	246.008						no	254.849	No
2-hydroxyibuprofen	Xenobiotics	Drug	43330	LC/MS Neg	100004169	3462	221.118	51146-55-5					no	242.391	No
2-methoxyacetaminophen glucuronide*	Xenobiotics	Drug	33161	LC/MS Neg	100001795	1633	356.099						no	281.505	No
2-methoxyacetaminophen sulfate*	Xenobiotics	Drug	47031	LC/MS Neg	100001793	1949	260.023						no	285.78	No
2-propylpentanoate (valproate)	Xenobiotics	Drug	22290	LC/MS Neg	100000779	3885.6	143.108	99-66-1	3121	3009	C07185	HMDB01877	no	36.1715	No
3-(cystein-S-yl)acetaminophen*	Xenobiotics	Drug	34365	LC/MS Pos Early	100001797	2420	271.075		5233914	4403253			no	366.462	No
3-(N-acetyl-L-cystein-S-yl) acetaminophen	Xenobiotics	Drug	45721	LC/MS Neg	2048	2094	311.071	52372-86-8	83967	75765			no	300.958	No
3-hydroxyquinine	Xenobiotics	Drug	43496	LC/MS Pos Late	100002410	678	341.186	78549-61-8	441264	138373	C07344	HMDB01091	no	0	No
4-acetamidophenol	Xenobiotics	Drug	12032	LC/MS Neg	1383	2173.7	150.056	103-90-2	1983	1906	C06804	HMDB01859	no	326.22	No
4-acetamidophenylglucuronide	Xenobiotics	Drug	15736	LC/MS Neg	100000043	1400	326.088	120595-80-4	83944	3239926		HMDB10316	no	258.04	No
4-acetaminophen sulfate	Xenobiotics	Drug	37475	LC/MS Neg	2049	1792	230.013	10066-90-7;32113-41-0	83939	75741	C06804	HMDB59911	no	518.103	No
4-acetylphenol sulfate	Xenobiotics	Drug	44620	LC/MS Neg	100000711	2375	215.002		4684006	3872009			yes	173.128	No
4-phenylbutyrate	Xenobiotics	Drug	43337	LC/MS Neg	100004197	3500	163.076	1821-12-1	4775	4611		HMDB00543	no	190.363	No
allopurinol riboside	Xenobiotics	Drug	38321	LC/MS Neg	100002454	1660	267.073	16220-07-8					no	78.2063	No
amoxicillin	Xenobiotics	Drug	52948	LC/MS Pos Early	100008962	2734	366.112	26787-78-0	2171;4663997	2086			no	#DIV/0!	No
atenolol	Xenobiotics	Drug	38658	LC/MS Pos Early	100002726	2668	267.17	29122-68-7	2249	2162	D00235	HMDB01924	no	138.982	No
atorvastatin (lipitor)	Xenobiotics	Drug	38619	LC/MS Neg	100002802	5101	557.246	134523-03-8	60823	54810	D00887	HMDB05006	no	117.801	No
carbamazepine	Xenobiotics	Drug	37033	LC/MS Pos Late	100001933	880	237.102	298-46-4	2554	2457	D00252	HMDB14704	no	29.4973	No
carbamazepine 10,11-epoxide*	Xenobiotics	Drug	37020	LC/MS Pos Early	100002321	3020	253.097	36507-30-9	2555	2458	C07496	HMDB60658	no	29.0004	No
carbamazepine glucuronide*	Xenobiotics	Drug	37056	LC/MS Neg	100002322	3884	411.12						no	123.201	No
carboxyibuprofen	Xenobiotics	Drug	43333	LC/MS Neg	100004171	1920	235.098	15935-54-3	10444113	8619532			no	76.9127	No
celecoxib	Xenobiotics	Drug	38599	LC/MS Neg	100002805	5283	380.069	169590-42-5	2662	2562	C07589	HMDB05014	no	154.802	No
desmethylnaproxen	Xenobiotics	Drug	46331	LC/MS Neg	100001787	3045	215.071	52079-10-4		18640362			no	36.1499	No
desmethylnaproxen sulfate	Xenobiotics	Drug	46106	LC/MS Neg	100001788	2276	295.028		184679	160559			no	99.2705	No
diclofenac	Xenobiotics	Drug	52931	LC/MS Pos Late	100008961	1222	296.024	15307-86-5			C01690	HMDB14724	no	193.425	No
diltiazem	Xenobiotics	Drug	42981	LC/MS Pos Late	100004015	888	415.169	33286-22-5	39186	35850	C06958	HMDB14487	no	70.0783	No
doxycycline	Xenobiotics	Drug	39273	LC/MS Pos Late	100003009	829	445.161	24390-14-5					no	#DIV/0!	No
enalapril	Xenobiotics	Drug	52949	LC/MS Pos Late	100008948	900	377.207		3222	3109			no	143.099	No
escitalopram	Xenobiotics	Drug	40459	LC/MS Pos Late	100003444	908	325.171	219861-08-2	146570	129277		HMDB05028	no	71.4219	No
fexofenadine	Xenobiotics	Drug	42021	LC/MS Pos Late	100004018	944	502.295	83799-24-0	3348	3231	C06999	HMDB05030	no	126.913	No
fluoxetine	Xenobiotics	Drug	44619	LC/MS Pos Late	1382	1025	310.141	59333-67-4	3386	3269	D00326		no	58.4815	No
fluvoxamine	Xenobiotics	Drug	40456	LC/MS Pos Late	100003443	1018	319.163	54739-18-3	5324346	4481878	C07571		no	#DIV/0!	No
furosemide	Xenobiotics	Drug	43009	LC/MS Neg	100004241	3515	329	54-31-9	3440	3322	D00331	HMDB01933	no	195.95	No
gabapentin	Xenobiotics	Drug	38686	LC/MS Neg	100002806	2407.4	170.119	60142-96-3	3446;6919078	3328	D00332	HMDB05015	no	148.24	No
Gemfibrozil	Xenobiotics	Drug	42984	LC/MS Neg	100004034	5166	249.15	25812-30-0	3463	3345	D00334	HMDB15371	no	0	No
hydrochlorothiazide	Xenobiotics	Drug	39625	LC/MS Neg	100002734	2046	295.957	58-93-5	3639	3513	C07041	HMDB01928	no	132.475	No
hydroquinone sulfate	Xenobiotics	Drug	35322	LC/MS Neg	100001604	1395	188.986	123-31-9	161220	141624	C00530	HMDB02434	yes	269.428	Yes
hydroxypioglitazone (M-IV)	Xenobiotics	Drug	43580	LC/MS Pos Early	100004177	3080	373.122	146062-44-4					no	54.224	No
ibuprofen	Xenobiotics	Drug	17799	LC/MS Neg	1487	4925	205.123	15687-27-1	3672	3544	D00126	HMDB01925	no	107.879	No
ibuprofen acyl glucuronide	Xenobiotics	Drug	38366	LC/MS Neg	100002406	4976	381.155	115075-59-7	163959	143793			no	220.73	No
ketopioglitazone	Xenobiotics	Drug	43579	LC/MS Neg	100004176	4165	369.091	146062-45-5					no	61.2942	No
lidocaine	Xenobiotics	Drug	35661	LC/MS Pos Early	100001538	3250	235.18	137-58-6	3676	3548	D00358	HMDB14426	no	39.1852	No
metformin	Xenobiotics	Drug	38306	LC/MS Pos Early	100002405	2817	130.109	1115-70-4	4091	3949	C07151	HMDB01921	no	78.7897	No
metoprolol	Xenobiotics	Drug	18037	LC/MS Pos Early	2028	3312	268.191	56392-17-7	4171	4027	D02358	HMDB01932	no	34.4662	No
metoprolol acid metabolite*	Xenobiotics	Drug	34109	LC/MS Pos Early	100001385	2950	268.154	56392-14-4	62936	56653			no	308.629	No
naproxen	Xenobiotics	Drug	12122	LC/MS Neg	1384	4155	229.087	22204-53-1	156391	137720	C01517	HMDB01923	no	322.443	No
N-desmethyl tramadol	Xenobiotics	Drug	52355	LC/MS Pos Early	100006384	3360	250.18	147762-57-0					no	76.7986	No
N-ethylglycinexylidide	Xenobiotics	Drug	33080	LC/MS Pos Early	100001539	3209	207.149	7728-40-7	24415	22824	C16561	HMDB60656	no	80.1366	No
nifedipine	Xenobiotics	Drug	34598	LC/MS Pos Late	100001514	1005	347.124		4485	4330	D00437		no	92.4132	No
norfluoxetine	Xenobiotics	Drug	37252	LC/MS Pos Late	100003769	1008	296.126	83891-03-6	4541	4382			no	52.7746	No
O-desmethyltramadol	Xenobiotics	Drug	53239	LC/MS Pos Early	100006382	3045	250.18	73986-53-5					no	141.393	No
O-desmethyltramadol glucuronide	Xenobiotics	Drug	52357	LC/MS Pos Early	100006383	2741	426.212	383891-39-2		28467711			no	105.672	No
ofloxacin	Xenobiotics	Drug	21320	LC/MS Neg	100000673	3600	360.137	82419-36-1	4583	4422	C07321	HMDB01929	no	7.1268	No
o-hydroxyatorvastatin	Xenobiotics	Drug	47883	LC/MS Neg	100005933	5015	573.241	214217-86-4	9808225	7983984			no	103.72	No
omeprazole	Xenobiotics	Drug	38600	LC/MS Neg	100002725	4673	344.107	73590-58-6	4594	4433	C07324	HMDB01913	no	181.137	No
oxypurinol	Xenobiotics	Drug	41726	LC/MS Neg	100002489	1171	151.026	2465-59-0	4644	4483	D02365	HMDB00786	no	49.279	No
pantoprazole	Xenobiotics	Drug	38609	LC/MS Pos Late	100002808	800	366.072	102625-70-7	4679	4517	C11806	HMDB05017	no	94.707	No
paroxetine	Xenobiotics	Drug	40461	LC/MS Pos Late	100003442	963	330.15	110429-49-8	43815	39888	D02362		no	64.6831	No
phenobarbital	Xenobiotics	Drug	27733	LC/MS Neg	100001045	3175	231.078	50-06-6	4763	4599	C07434	HMDB15305	no	#DIV/0!	No
p-hydroxyatorvastatin	Xenobiotics	Drug	47881	LC/MS Neg	100005939	4650	573.241	265989-44-4	9851106	8026819			no	133.072	No
pioglitazone	Xenobiotics	Drug	33139	LC/MS Pos Early	100001317	3240	357.127	112529-15-4	4829	4663	C07675	HMDB15264	no	122.312	No
pivaloylcarnitine	Xenobiotics	Drug	35432	LC/MS Pos Early	100001589	3005	246.17		126894	112688		HDMB41993	no	338.99	No
pregabalin	Xenobiotics	Drug	52913	LC/MS Pos Early	100008943	3123	160.133	148553-50-8	4715169	3902475			no	120.545	No
pseudoephedrine	Xenobiotics	Drug	39586	LC/MS Pos Early	100002738	3041	166.123	90-82-4	7028	6761	C02765	HMDB01943	no	70.7029	No
quetiapine	Xenobiotics	Drug	39787	LC/MS Pos Late	100002809	874	384.174	111974-69-7	5002	4827	C07397	HMDB05021	no	67.675	No
quinine	Xenobiotics	Drug	39767	LC/MS Neg	100002968	5252	323.176	130-95-0	2728270	2010267			no	0	No
ranitidine	Xenobiotics	Drug	38595	LC/MS Pos Early	100002735	2910	315.149	66357-59-3	3001055	2272523	D00422	HMDB01930	no	204.648	No
rivaroxaban	Xenobiotics	Drug	52958	LC/MS Neg	100008950	4425	434.058	366789-02-8	6433119	4938307			no	#DIV/0!	No
rosuvastatin	Xenobiotics	Drug	40421	LC/MS Neg	100003272	4500	480.161	147098-20-2	446157	393589	D01915	HMDB15230	no	103.398	No
salicylate	Xenobiotics	Drug	1515	LC/MS Polar	501	802	137.024	69-72-7	338	331	C00805	HMDB01895	yes	349.239	Yes
salicyluric glucuronide*	Xenobiotics	Drug	33384	LC/MS Neg	100001332	1463	370.078			21403117			no	434.354	No
sildenafil	Xenobiotics	Drug	52961	LC/MS Pos Late	100008971	946	475.212	139755-83-2	5212	5023	C07259	HMDB05039	no	149.7	No
sitagliptin	Xenobiotics	Drug	52954	LC/MS Neg	100008964	4485	468.111	486460-32-6	11306691	9481667			no	102.337	No
solifenacin	Xenobiotics	Drug	53001	LC/MS Pos Late	100008973	1042	363.207	180468-39-7	9885319	8060993			no	0	No
sulfamethoxazole	Xenobiotics	Drug	53240	LC/MS Pos Early	100009327	2405	254.059		5329	5138	D00285	HMDB15150	no	124.542	No
tadalafil	Xenobiotics	Drug	52950	LC/MS Neg	100008974	4898	388.13	171596-29-5	4687521	3875386			no	105.962	No
topiramate	Xenobiotics	Drug	2772	LC/MS Neg	1388	4021	338.092	97240-79-4	5284627	4447672	C07502	HMDB05034	no	81.4158	No
Tramadol	Xenobiotics	Drug	53241	LC/MS Pos Early	100006381	3288	264.196	27203-92-5	33741	31105	D08623	HMDB14339	no	189.939	No
valsartan	Xenobiotics	Drug	48566	LC/MS Neg	100006232	4228	434.22	137862-53-4	5650	5448			no	159.194	No
veratric acid	Xenobiotics	Drug	43532	LC/MS Neg	100004473	1890	181.051	93-07-2	7121	6854			no	270.818	No
warfarin	Xenobiotics	Drug	43335	LC/MS Neg	100004175	3790	307.098	5543-57-7					no	54.9026	No
(15:2)-anacardic acid	Xenobiotics	Food Component/Plant	41397	LC/MS Neg	100003472	5565	343.228	11034-77-8	11824131	9998782			no	0	No
1,1-kestotetraose	Xenobiotics	Food Component/Plant	39796	LC/MS Neg	100003047	1381	665.215	13133-07-8	166775	145907		HMDB39176	no	91.2396	No
1-kestose	Xenobiotics	Food Component/Plant	22012	LC/MS Neg	100000980	1054	503.162	470-69-9	440080	389087	C03661	HMDB11729	no	246.263	No
2,3-dihydroxyisovalerate	Xenobiotics	Food Component/Plant	38276	LC/MS Polar	100002417	1050	133.051	1756-18-9	677	657	C04039	HMDB12141	yes	220.147	Yes
2-isopropylmalate	Xenobiotics	Food Component/Plant	15667	LC/MS Polar	100000409	2605	175.061	3237-44-3	77	76	C02504	HMDB00402	yes	214.68	No
2-oxindole-3-acetate	Xenobiotics	Food Component/Plant	40479	LC/MS Pos Early	100003109	2378	192.066	2971-31-5	3080590	2338343			no	146.96	No
2-piperidinone	Xenobiotics	Food Component/Plant	43400	LC/MS Pos Early	100004295	1675	100.076	675-20-7	12665	12144			yes	140.241	Yes
3-hydroxycinnamate sulfate	Xenobiotics	Food Component/Plant	48409	LC/MS Neg	100006094	1338	242.997	86321-30-4	6443141	4947175			no	139.973	No
4-allylphenol sulfate	Xenobiotics	Food Component/Plant	37181	LC/MS Neg	100001868	3805	213.023						yes	135.876	Yes
4-vinylguaiacol sulfate	Xenobiotics	Food Component/Plant	48442	LC/MS Neg	100006126	3354	229.018						yes	164.84	No
acesulfame	Xenobiotics	Food Component/Plant	48569	LC/MS Neg	100006203	1581	161.987	55589-62-3					no	294.826	No
alliin	Xenobiotics	Food Component/Plant	41494	LC/MS Pos Early	100003473	1470	178.053	556-27-4	87310	78760	C08265	HMDB33592	no	211.477	Yes
betonicine	Xenobiotics	Food Component/Plant	38100	LC/MS Pos Early	100002153	1012	160.097	515-25-3	164642	144333	C08269	HMDB29412	no	222.292	Yes
cinnamoylglycine	Xenobiotics	Food Component/Plant	38637	LC/MS Neg	100002253	3127	204.067	16534-24-0	709625	618829		HMDB11621	yes	200.275	Yes
daidzein sulfate (2)	Xenobiotics	Food Component/Plant	48728	LC/MS Neg	100006363	3330	333.008						no	266.788	No
dihydroferulic acid	Xenobiotics	Food Component/Plant	40481	LC/MS Neg	100003432	1928	195.066	1135-23-5	14340	13701			yes	129.87	No
ergothioneine	Xenobiotics	Food Component/Plant	37459	LC/MS Pos Early	100002154	850	230.096	58511-63-0	3032311	2297320	C05570	HMDB03045	yes	99.4349	Yes
erythritol	Xenobiotics	Food Component/Plant	20699	LC/MS Polar	100000846	1491	167.056	149-32-6	222285	13835932	C00503	HMDB02994	yes	101.73	Yes
eugenol sulfate	Xenobiotics	Food Component/Plant	48715	LC/MS Neg	100006171	3782	243.033	95480-60-7	180632	157181			yes	252.147	Yes
ferulic acid 4-sulfate	Xenobiotics	Food Component/Plant	47114	LC/MS Neg	100005389	1225	273.007	86321-29-1	6305574	4878542		HMDB29200	yes	128.563	Yes
gluconate	Xenobiotics	Food Component/Plant	587	LC/MS Polar	338	2922	195.051	527-07-1	10690	10240	C00257	HMDB00625	yes	121.434	Yes
homostachydrine*	Xenobiotics	Food Component/Plant	33009	LC/MS Pos Early	100001550	1750	158.118	1195-94-4	441447	390180	C08283	HMDB33433	yes	186.186	Yes
indoleacrylate	Xenobiotics	Food Component/Plant	22114	LC/MS Neg	100000800	2511	186.056	1204-06-4	15030923	4524636		HMDB00734	no	207.211	No
indolin-2-one	Xenobiotics	Food Component/Plant	43374	LC/MS Pos Early	100004318	2575	134.06	59-48-3	321710	284794	C12312		no	154.068	Yes
isoeugenol sulfate	Xenobiotics	Food Component/Plant	48997	LC/MS Neg	100006089	3893	243.033						no	190.337	No
methyl glucopyranoside (alpha + beta)	Xenobiotics	Food Component/Plant	46144	LC/MS Neg	100005864	1070	193.072						yes	175.058	Yes
methyl indole-3-acetate	Xenobiotics	Food Component/Plant	1584	LC/MS Pos Early	1104	3339	190.086	1912-33-0	74706	67279		HMDB29738	yes	220.93	Yes
N-(2-furoyl)glycine	Xenobiotics	Food Component/Plant	31536	LC/MS Neg	100001086	1525.8	168.03	5657-19-2;5657-19-2	21863	20549		HMDB00439	yes	418.381	Yes
N-acetylalliin	Xenobiotics	Food Component/Plant	45404	LC/MS Pos Early	100005367	1348	220.064						no	338.681	Yes
N-acetyl-S-allyl-L-cysteine	Xenobiotics	Food Component/Plant	47136	LC/MS Neg	100005818	2237	202.054	23127-41-5	152467	134378			no	163.909	No
phytanate	Xenobiotics	Food Component/Plant	598	LC/MS Neg	466	5908	311.296	14721-66-5	26840	10140204	C01607	HMDB00417	yes	67.1748	No
piperine	Xenobiotics	Food Component/Plant	33935	LC/MS Pos Late	100001267	1168	286.144	94-62-2	638024	553590	C03882	HMDB29377	yes	120.869	Yes
pyrraline	Xenobiotics	Food Component/Plant	48428	LC/MS Neg	100001767	2304	253.119	74509-14-1		19980286			yes	81.3682	Yes
quinate	Xenobiotics	Food Component/Plant	18335	LC/MS Polar	100000442	2432.9	191.056	77-95-2	6508	10246715	C00296	HMDB03072	yes	172.188	Yes
retinal	Xenobiotics	Food Component/Plant	40807	LC/MS Pos Late	100004088	1657	285.221		638015	553582	C00376	HMDB01358	yes	45.9083	No
saccharin	Xenobiotics	Food Component/Plant	21151	LC/MS Neg	100000870	1999.7	181.992	81-07-2	5143	4959	D01085	HMDB29723	no	401.526	No
S-allylcysteine	Xenobiotics	Food Component/Plant	43239	LC/MS Pos Early	100004509	2690	162.058	21593-77-1	98280	88744			no	134.882	Yes
solanidine	Xenobiotics	Food Component/Plant	39788	LC/MS Pos Late	100002773	1010	398.342	80-78-4	65727	59150	C06543	HMDB03236	no	84.9139	No
stachydrine	Xenobiotics	Food Component/Plant	34384	LC/MS Pos Early	100001296	1440	144.102	4136-37-2	115244	103115	C10172	HMDB04827	yes	116.39	Yes
sucralose	Xenobiotics	Food Component/Plant	36649	LC/MS Neg	100001789	3140	395.007	56038-13-2	71485		C12285	HMDB31554	no	138.353	No
syringol sulfate	Xenobiotics	Food Component/Plant	48454	LC/MS Neg	100006256	2395	233.013	52904-67-3					no	323.448	No
tartarate	Xenobiotics	Food Component/Plant	15336	LC/MS Neg	100000295	615.3	149.009	87-69-4;6106-24-7	444305	852	C00898	HMDB00956	yes	275.99	No
theanine	Xenobiotics	Food Component/Plant	22206	LC/MS Neg	100000784	1180	173.093	3081-61-6	439378	388498	C01047	HMDB34365	no	134.903	Yes
thymol sulfate	Xenobiotics	Food Component/Plant	36095	LC/MS Neg	100001757	4410	229.054	89-83-8		10709958	C09908	HMDB01878	yes	555.659	Yes
umbelliferone sulfate	Xenobiotics	Food Component/Plant	48674	LC/MS Neg	100006282	2442.8	240.981	69526-88-1	129659	114800			yes	216.188	No
3-hydroxycotinine glucuronide	Xenobiotics	Tobacco Metabolite	43470	LC/MS Neg	100004494	1745	367.115	132929-88-5	183115	159230			no	111.247	No
cotinine	Xenobiotics	Tobacco Metabolite	553	LC/MS Pos Early	848	2213	177.102	486-56-6	854019	746405		HMDB01046	no	202.1	No
cotinine N-oxide	Xenobiotics	Tobacco Metabolite	38662	LC/MS Pos Early	100002719	1377	193.097	36508-80-2	9815514	7991264		HMDB01411	no	65.301	No
hydroxycotinine	Xenobiotics	Tobacco Metabolite	38661	LC/MS Pos Early	100002717	2030	193.097	34834-67-8	10219774	8395266		HMDB01390	no	96.2892	No
1,3,7-trimethylurate	Xenobiotics	Xanthine Metabolism	34404	LC/MS Neg	100001397	1985	209.068	5415-44-1	79437	71754	C16361	HMDB02123	yes	105.776	Yes
1,3-dimethylurate	Xenobiotics	Xanthine Metabolism	32391	LC/MS Neg	100001106	1671.4	195.052	944-73-0	70346	63527		HMDB01857	yes	173.599	Yes
1,7-dimethylurate	Xenobiotics	Xanthine Metabolism	34400	LC/MS Neg	100001399	1578.6	195.052	33868-03-0	91611	82720	C16356	HMDB11103	yes	82.8004	Yes
1-methylurate	Xenobiotics	Xanthine Metabolism	34395	LC/MS Pos Early	100001400	1461	183.051	708-79-2	69726	62926	C16359	HMDB03099	yes	193.388	Yes
1-methylxanthine	Xenobiotics	Xanthine Metabolism	34389	LC/MS Neg	100001405	1568.8	165.042	6136-37-4	80220	72464	C16358	HMDB10738	yes	77.8964	Yes
3,7-dimethylurate	Xenobiotics	Xanthine Metabolism	34399	LC/MS Neg	100001398	1418.2	195.052	13087-49-5	83126	74994	C16360	HMDB01982	yes	71.7455	No
3-methylurate*	Xenobiotics	Xanthine Metabolism	48252	LC/MS Neg	100004049	1024	181.037	605-99-2	11804	11311			no	224.859	No
3-methylxanthine	Xenobiotics	Xanthine Metabolism	32445	LC/MS Neg	100001108	1700	165.042	1076-22-8	70639	63805	C16357	HMDB01886	yes	85.2653	Yes
5-acetylamino-6-amino-3-methyluracil	Xenobiotics	Xanthine Metabolism	34424	LC/MS Polar	100001403	1710	197.068	19893-78-8	88299	79659	C16366	HMDB04400	yes	102.203	Yes
5-acetylamino-6-formylamino-3-methyluracil	Xenobiotics	Xanthine Metabolism	34401	LC/MS Polar	100001402	1424	225.063	85438-96-6	108214	97287	C16365	HMDB11105	no	135.828	No
7-methylurate	Xenobiotics	Xanthine Metabolism	39598	LC/MS Neg	100002241	1138	181.037	612-37-3	69160	62375			no	165.788	No
7-methylxanthine	Xenobiotics	Xanthine Metabolism	34390	LC/MS Pos Early	100001396	1350	167.056	552-62-5	68374	61660	C16353	HMDB01991	yes	86.786	Yes
caffeic acid sulfate	Xenobiotics	Xanthine Metabolism	53254	LC/MS Polar	100009337	1307	258.992			30777608		HMDB41708	yes	192.812	Yes
caffeine	Xenobiotics	Xanthine Metabolism	569	LC/MS Pos Early	849	2106	195.088	58-08-2	2519	2424	C07481	HMDB01847	yes	91.5532	Yes
paraxanthine	Xenobiotics	Xanthine Metabolism	18254	LC/MS Neg	100000453	2279	179.057	611-59-6	4687	4525	C13747	HMDB01860	yes	73.9629	Yes
theobromine	Xenobiotics	Xanthine Metabolism	18392	LC/MS Pos Early	100000445	1600	181.072	83-67-0	5429	5236	C07480	HMDB02825	yes	78.2431	Yes
theophylline	Xenobiotics	Xanthine Metabolism	18394	LC/MS Neg	100000437	2356.9	179.057	58-55-9	2153	2068	C07130	HMDB01889	yes	117.931	Yes
X - 01911			46459	LC/MS Neg		3991	462.177						yes	108.07	No
X - 02249			46500	LC/MS Neg		4012	267.124						yes	62.9767	No
X - 02269			46497	LC/MS Neg		1525.4	255.088						yes	140.848	No
X - 07765			46590	LC/MS Neg		3698	245.048						yes	151.541	Yes
X - 09789			46355	LC/MS Neg		2580.5	153.02						yes	74.6309	No
X - 10458			47478	LC/MS Neg		3634	231.124						no	56.4554	Yes
X - 11261			32578	LC/MS Pos Late		870	286.201						yes	115.644	No
X - 11299			46592	LC/MS Neg		4886	507.222						no	269.559	Yes
X - 11308			46390	LC/MS Neg		5163	365.27						yes	57.0316	Yes
X - 11315			49592	LC/MS Neg		1157	128.072						yes	74.5628	Yes
X - 11334			46663	LC/MS Pos Early		2017	259.092						yes	134.095	No
X - 11372			46594	LC/MS Neg		5319	467.373						yes	56.7026	Yes
X - 11378			46595	LC/MS Neg		5343	445.331						yes	70.4914	No
X - 11381			46347	LC/MS Neg		1118	184.098						yes	46.6338	Yes
X - 11429			46597	LC/MS Neg		1151	245.077						yes	91.4392	No
X - 11438			46598	LC/MS Neg		3121	241.144						yes	62.0033	No
X - 11440			46599	LC/MS Neg		3515	246.074						yes	79.7323	No
X - 11441			46360	LC/MS Neg		3755.8	331.131						yes	144.082	No
X - 11442			46443	LC/MS Neg		3890	331.13						yes	130.367	No
X - 11444			46460	LC/MS Neg		3972	541.265						yes	95.9348	Yes
X - 11452			46600	LC/MS Neg		4134	352.085						yes	104.944	No
X - 11470			46601	LC/MS Neg		4151	525.271						yes	84.4199	Yes
X - 11478			46602	LC/MS Neg		4285	165.092						yes	166.376	Yes
X - 11483			47650	LC/MS Neg		4449	505.208						no	231.388	Yes
X - 11491			47651	LC/MS Neg		4819	567.319						yes	198.933	No
X - 11522			46914	LC/MS Neg		4760	313.12						yes	89.0688	No
X - 11530			46603	LC/MS Neg		4892	313.12						yes	90.5033	No
X - 11537			47594	LC/MS Pos Late		1427	366.336						yes	84.2296	No
X - 11538			46604	LC/MS Neg		4873	311.223						yes	84.5841	No
X - 11540			32857	LC/MS Pos Late		1200	342.263						yes	63.7197	No
X - 11549			47652	LC/MS Neg		5100	339.255						yes	63.1853	No
X - 11564			46260	LC/MS Neg		1157.1	177.023						yes	87.4497	No
X - 11578			49690	LC/MS Neg		4982	459.259						no	51.3972	No
X - 11787			33132	LC/MS Pos Early		2319	148.097						yes	33.6638	Yes
X - 11795			33140	LC/MS Pos Early		2556	148.097						yes	66.2709	Yes
X - 11805			46509	LC/MS Pos Early		2655	418.193						yes	90.9977	No
X - 11838			46982	LC/MS Neg		2285	276.002						no	240.143	No
X - 11843			46466	LC/MS Neg		2674.6	230.013						yes	199.1	Yes
X - 11847			46488	LC/MS Neg		3087	259.01						yes	103.222	Yes
X - 11849			46607	LC/MS Neg		3215	266.018						yes	96.2754	Yes
X - 11850			46507	LC/MS Neg		3176	226.018						yes	219.56	Yes
X - 11852			46521	LC/MS Neg		3277.6	232.995						no	194.236	Yes
X - 11858			47654	LC/MS Neg		4414	437.055						yes	215.601	Yes
X - 11871			47641	LC/MS Pos Late		1540	370.367						yes	79.2348	No
X - 11880			46608	LC/MS Neg		5341	537.416						yes	58.4586	Yes
X - 11905			46367	LC/MS Neg		4396.5	283.192						yes	60.1482	No
X - 11979			47508	LC/MS Neg		1990	249.063						no	121.817	No
X - 12007			46610	LC/MS Neg		1357	222.992						yes	137.056	Yes
X - 12013			46611	LC/MS Neg		2066	242.013						yes	191.46	Yes
X - 12026			47905	LC/MS Neg		1652	180.053						yes	86.2308	Yes
X - 12063			46588	LC/MS Neg		4800	427.214						yes	77.3213	No
X - 12100			47908	LC/MS Neg		1551	219.078						yes	79.4957	Yes
X - 12101			47642	LC/MS Pos Early		2700	164.074						yes	100.509	Yes
X - 12104			52597	LC/MS Neg		1763	269.077						yes	125.321	Yes
X - 12126			46966	LC/MS Neg		1205	324.074						no	227.149	No
X - 12127			47702	LC/MS Pos Early		2160	226.082						yes	165.622	Yes
X - 12170			47909	LC/MS Neg		1829	179.047						yes	396.656	No
X - 12206			46612	LC/MS Neg		622	254.982						yes	80.2692	No
X - 12212			46358	LC/MS Neg		3597.7	229.018						yes	146.303	No
X - 12214			47513	LC/MS Neg		1975	242.013						no	92.1593	No
X - 12216			46613	LC/MS Neg		1691	227.997						yes	136.92	Yes
X - 12221			47911	LC/MS Neg		1467	203.998						no	116.918	No
X - 12230			46614	LC/MS Neg		3346	217.018						yes	194.658	No
X - 12231			47656	LC/MS Neg		4203	352.087						yes	109.786	No
X - 12254			47515	LC/MS Neg		2593	239.997						no	165.396	No
X - 12257			47912	LC/MS Neg		1774	269.067						no	415.495	No
X - 12261			47657	LC/MS Neg		1853	258.008						no	151.422	No
X - 12262			47914	LC/MS Neg		2280	258.008						no	152.296	No
X - 12263			47915	LC/MS Neg		1372	275.023						no	345.403	No
X - 12283			47708	LC/MS Pos Early		2646	245.092						no	377.14	Yes
X - 12306			47917	LC/MS Neg		2350	247.028						yes	106.412	Yes
X - 12329			47659	LC/MS Neg		1854	188.003						no	224.786	No
X - 12339			47709	LC/MS Pos Early		1792	174.087						yes	65.3907	No
X - 12379			46996	LC/MS Neg		2770	295.131						no	126.276	No
X - 12407			46615	LC/MS Neg		1873	204.981						no	74.8029	No
X - 12410			47921	LC/MS Neg		2086	274.039						yes	204.907	No
X - 12411			46616	LC/MS Neg		1037	195.033						yes	415.85	Yes
X - 12442			46618	LC/MS Neg		5315	223.171						yes	70.4257	No
X - 12450			46619	LC/MS Neg		5408	251.202						yes	81.4289	No
X - 12456			47639	LC/MS Neg		4342	427.216						no	119.64	No
X - 12459			33904	LC/MS Pos Late		1060	302.232						yes	54.1758	No
X - 12472			46628	LC/MS Neg		2528	241.119						yes	306.888	No
X - 12511			46458	LC/MS Neg		3943	200.129						yes	86.7474	No
X - 12524			46621	LC/MS Neg		5780	205.16						yes	44.0602	No
X - 12543			47922	LC/MS Neg		1409	181.051						no	164.695	No
X - 12544			46510	LC/MS Neg		3166.9	209.082						yes	471.412	Yes
X - 12680			47437	LC/MS Pos Early		2900	229.129						yes	105.763	Yes
X - 12681			47715	LC/MS Pos Early		2200	176.103						yes	68.6617	No
X - 12686			47716	LC/MS Pos Early		810	181.053						yes	65.1241	No
X - 12688			47718	LC/MS Pos Early		2300	203.139						yes	126.598	No
X - 12712			47931	LC/MS Neg		1644	218.997						no	337.963	No
X - 12714			46318	LC/MS Neg		1617	303.073						no	340.802	No
X - 12715			47933	LC/MS Neg		1678	279.099						no	424.028	No
X - 12718			46973	LC/MS Neg		1750	324.074						no	270.951	No
X - 12726			47936	LC/MS Neg		1942	233.013						yes	335.766	No
X - 12729			46623	LC/MS Neg		2021	227.997						yes	106.686	Yes
X - 12730			47937	LC/MS Neg		2048	203.997						no	236.875	No
X - 12731			47938	LC/MS Neg		2040	238.969						no	138.001	No
X - 12738			47940	LC/MS Neg		2389	230.997						no	170.755	No
X - 12739			46626	LC/MS Neg		2406	241.119						yes	199.596	No
X - 12740			46627	LC/MS Neg		2497	287.023						no	141.972	No
X - 12748			46894	LC/MS Neg		539	320.062						yes	92.5476	No
X - 12753			47723	LC/MS Pos Early		1422	220.064						no	215.548	No
X - 12798			46624	LC/MS Pos Early		2011	240.102						no	59.1719	Yes
X - 12812			46986	LC/MS Neg		2435	208.062						no	313.572	Yes
X - 12814			46991	LC/MS Neg		2610	405.178						no	240.83	No
X - 12816			46630	LC/MS Neg		2700	495.224						no	153.239	No
X - 12818			47943	LC/MS Neg		2695	263.023						no	225.49	No
X - 12819			46995	LC/MS Neg		2710	170.083						no	145.408	No
X - 12822			46997	LC/MS Neg		2790	389.093						yes	100.691	Yes
X - 12824			46471	LC/MS Neg		2813.2	243.135						yes	130.649	No
X - 12830			47662	LC/MS Neg		3197	372.113						no	358.51	No
X - 12831			47948	LC/MS Neg		3209	433.209						no	321.755	No
X - 12834			47950	LC/MS Neg		3385	279.135						no	290.274	No
X - 12836			47951	LC/MS Neg		3590	345.156						no	305.113	No
X - 12844			46633	LC/MS Neg		4185	539.249						yes	65.9913	Yes
X - 12846			46634	LC/MS Neg		4228	481.243						yes	193.36	No
X - 12847			46364	LC/MS Neg		4247.4	227.039						yes	279.649	Yes
X - 12848			47025	LC/MS Neg		4285	350.072						no	143.561	No
X - 12849			46636	LC/MS Neg		4696	331.176						no	230.726	Yes
X - 12851			46639	LC/MS Neg		4844	311.666						no	214.035	Yes
X - 12906			47955	LC/MS Neg		793	158.046						yes	204.889	No
X - 13431			47788	LC/MS Pos Late		1015	302.232						yes	74.9062	No
X - 13435			46733	LC/MS Pos Late		1095	314.232						no	86.5438	No
X - 13529			46643	LC/MS Neg		2011	188.093						yes	104.407	No
X - 13553			47959	LC/MS Neg		1407	263.023						yes	86.1232	Yes
X - 13658			47664	LC/MS Neg		4643	253.083						yes	220.723	Yes
X - 13684			47790	LC/MS Pos Early		1642	242.015						no	77.993	Yes
X - 13689			47774	LC/MS Neg		3665	495.224						no	334.353	No
X - 13699			46631	LC/MS Pos Early		2900	284.185						no	248.483	No
X - 13722			47964	LC/MS Neg		875	160.062						no	91.5019	No
X - 13723			47965	LC/MS Neg		1309	211.062						no	232.319	No
X - 13726			47967	LC/MS Neg		1532	379.035						no	510.165	No
X - 13729			47971	LC/MS Neg		1745	241.977						yes	177.921	No
X - 13835			46646	LC/MS Neg		1017	169.062						yes	346.18	Yes
X - 13837			47795	LC/MS Pos Early		1856	301.139						no	233.824	No
X - 13844			47977	LC/MS Neg		1442	209.057						no	396.554	No
X - 13846			47978	LC/MS Neg		1433	301.057						no	177.114	No
X - 13866			46417	LC/MS Neg		2417.8	253.108						yes	114.579	Yes
X - 14056			46632	LC/MS Pos Early		810	192.033						yes	142.757	Yes
X - 14095			47211	LC/MS Neg		1007	199.073						yes	149.21	No
X - 14096			47212	LC/MS Neg		1021	229.083						yes	48.8046	No
X - 14302			47226	LC/MS Neg		2211	241.12						no	128.342	No
X - 14314			47225	LC/MS Neg		2273	241.12						yes	196.753	No
X - 14364			46463	LC/MS Neg		2590	275.104						yes	136.29	No
X - 14384			47231	LC/MS Neg		2711	265.12						yes	103.469	No
X - 14568			46649	LC/MS Neg		661	132.921						yes	13.0832	No
X - 14626			46655	LC/MS Neg		4855	288.62						yes	181.931	No
X - 14658			46652	LC/MS Neg		4800	288.62						yes	880.059	No
X - 14662			46656	LC/MS Neg		4336	263.628						no	1314.89	No
X - 14838			47787	LC/MS Pos Early		2000	141.066						yes	408.138	No
X - 14939			46657	LC/MS Neg		4353	165.092						yes	61.5123	Yes
X - 15150			47259	LC/MS Neg		1544	294.11						no	127.816	No
X - 15220			46658	LC/MS Neg		2662	274.112						no	90.2315	Yes
X - 15245			46661	LC/MS Neg		568	233.03						yes	306.531	No
X - 15469			46640	LC/MS Pos Late		785	304.212						yes	67.8648	No
X - 15486			46266	LC/MS Neg		3629	269.151						yes	211.602	Yes
X - 15492			46662	LC/MS Neg		4678	541.265						yes	91.0718	No
X - 15497			46473	LC/MS Neg		2843	236.093						yes	81.1061	No
X - 15503			46977	LC/MS Neg		1845	193.063						yes	281.374	Yes
X - 15646			47576	LC/MS Neg		2902	343.086						no	377.35	No
X - 15666			47800	LC/MS Pos Early		2755	221.092						no	105.525	Yes
X - 15674			46665	LC/MS Neg		1362	187.025						no	142.142	No
X - 15728			46666	LC/MS Neg		3976	231.033						yes	163.002	Yes
X - 16071			46738	LC/MS Neg		3692	144.046						yes	39.7994	No
X - 16087			47988	LC/MS Neg		4143	443.157						yes	150.031	Yes
X - 16123			46668	LC/MS Neg		2624	552.236						yes	70.0527	No
X - 16124			46461	LC/MS Neg		2563.6	203.002						no	288.1	Yes
X - 16132			46380	LC/MS Neg		983	313.444						yes	62.4703	No
X - 16134			46697	LC/MS Neg		2892	601.777						yes	58.4133	No
X - 16135			46699	LC/MS Neg		3308	508.744						yes	50.8797	No
X - 16245			46669	LC/MS Neg		4545	287.187						no	48.997	No
X - 16343			47275	LC/MS Neg		2064	278.115						no	123.692	No
X - 16397			47802	LC/MS Pos Early		2809	248.095						no	69.417	Yes
X - 16480			46671	LC/MS Neg		4704	309.207						yes	128.356	No
X - 16570			47013	LC/MS Neg		3765	198.114						no	90.7842	No
X - 16576			46673	LC/MS Neg		4496	167.108						yes	109.912	Yes
X - 16580			47804	LC/MS Pos Early		2537	222.079						yes	77.1401	Yes
X - 16654			46677	LC/MS Neg		4598	235.118						yes	152.961	No
X - 16935			46681	LC/MS Neg		4471	447.276						yes	108.553	Yes
X - 16938			46511	LC/MS Neg		2000	233.103						yes	46.0881	Yes
X - 16944			46683	LC/MS Neg		3718	141.092						yes	128.15	No
X - 16946			46517	LC/MS Neg		3240	317.115						yes	99.3605	No
X - 16947			46480	LC/MS Neg		3802	345.156						yes	385.073	No
X - 16964			46685	LC/MS Neg		3034	174.059						yes	105.262	Yes
X - 17145			46689	LC/MS Neg		3862	257.176						yes	100.093	No
X - 17146			46691	LC/MS Neg		4851	375.181						no	646.076	Yes
X - 17162			47806	LC/MS Pos Late		900	593.333						no	109.492	No
X - 17166			46692	LC/MS Neg		2187	653.268						yes	69.5937	No
X - 17167			46693	LC/MS Neg		2842	673.808						yes	74.514	No
X - 17178			46406	LC/MS Neg		2380.2	661.255						yes	64.9257	No
X - 17179			46698	LC/MS Neg		2480	595.753						yes	71.9444	No
X - 17185			46490	LC/MS Neg		3079.5	215.002						yes	276.271	Yes
X - 17189			46412	LC/MS Neg		2399	411.49						yes	62.1158	No
X - 17269			46704	LC/MS Neg		4538	155.108						no	66.3384	No
X - 17299			40097	LC/MS Pos Early		2344	229.154						yes	113.257	No
X - 17301			47808	LC/MS Pos Early		2911	179.118						no	86.9589	No
X - 17304			47796	LC/MS Pos Early		1525	303.07						no	232.005	No
X - 17325			46672	LC/MS Neg		2868	184.098						yes	114.619	Yes
X - 17327			47817	LC/MS Pos Early		2750	257.149						no	157.328	No
X - 17328			47818	LC/MS Pos Late		910	308.185						yes	229.78	No
X - 17335			47820	LC/MS Pos Late		1052	248.168						yes	48.172	No
X - 17337			47821	LC/MS Pos Late		1136	328.248						yes	65.2037	No
X - 17340			47872	LC/MS Neg		4697	539.25						yes	116.146	Yes
X - 17343			47995	LC/MS Neg		1326	190.966						no	251.795	No
X - 17346			47997	LC/MS Neg		1729	253.083						no	219.827	Yes
X - 17348			46989	LC/MS Neg		2545	247.083						no	253.668	No
X - 17350			48000	LC/MS Neg		2721	345.156						no	1209.4	No
X - 17351			48001	LC/MS Neg		3390	243.078						yes	430.725	No
X - 17353			48003	LC/MS Neg		3430	507.209						no	290.613	No
X - 17354			47009	LC/MS Neg		3520	473.147						no	237.634	No
X - 17357			48009	LC/MS Neg		4098	541.266						yes	100.947	Yes
X - 17359			48011	LC/MS Neg		4606	541.266						yes	112.715	No
X - 17361			48013	LC/MS Neg		4840	331.177						no	157.016	No
X - 17365			46976	LC/MS Neg		1785	282.049						no	430.894	No
X - 17367			46994	LC/MS Neg		2710	182.083						yes	142.294	Yes
X - 17371			48016	LC/MS Neg		3783	452.194						no	258.237	No
X - 17398			48051	LC/MS Neg		1765	391.035						no	322.21	No
X - 17438			46705	LC/MS Neg		1950	245.139						yes	121.663	No
X - 17469			46706	LC/MS Neg		4840	227.12						yes	140.355	No
X - 17612			48052	LC/MS Neg		4308	567.319						no	133.738	No
X - 17653			46707	LC/MS Neg		5128	365.269						yes	57.4815	Yes
X - 17654			46709	LC/MS Neg		5200	365.269						yes	52.3494	Yes
X - 17655			48019	LC/MS Neg		4169	421.061						no	345.306	Yes
X - 17673			48021	LC/MS Neg		1294	148.973						no	591.111	No
X - 17677			48022	LC/MS Neg		1544	204.982						no	226.258	No
X - 17685			48025	LC/MS Neg		2575	233.013						yes	223.385	Yes
X - 17690			46710	LC/MS Neg		2904	245.049						yes	280.559	Yes
X - 17705			48036	LC/MS Neg		4648	594.366						no	153.848	No
X - 18249			46366	LC/MS Neg		4404.1	220.942						yes	51.2634	No
X - 18345			47342	LC/MS Neg		1400	245.114						yes	149.116	Yes
X - 18606			48044	LC/MS Neg		3934	429.178						no	280.013	No
X - 18779			46687	LC/MS Neg		1969	209.045						yes	48.7946	No
X - 18838			48046	LC/MS Neg		1756	338.089						no	328.586	Yes
X - 18889			47347	LC/MS Neg		2633	202.109						yes	157.968	No
X - 18899			47670	LC/MS Neg		3730	337.143						yes	84.0586	Yes
X - 18901			46690	LC/MS Neg		3800	211.025						yes	254.093	Yes
X - 18913			46695	LC/MS Neg		4538	185.118						yes	83.4116	Yes
X - 18914			46368	LC/MS Neg		4503	266.889						yes	64.706	No
X - 18921			47671	LC/MS Neg		4870	193.124						yes	146.051	Yes
X - 19141			46701	LC/MS Neg		3705	415.197						yes	152.318	Yes
X - 19183			47672	LC/MS Neg		1665	230.05						no	105.196	No
X - 19197			47351	LC/MS Neg		2387	298.141						no	126.723	No
X - 19434			48772	LC/MS Neg		4539	583.313						no	240.253	No
X - 19438			46261	LC/MS Neg		1209	217.072						yes	131.364	Yes
X - 19455			47674	LC/MS Neg		4397	261.023						no	103.971	No
X - 19561			47561	LC/MS Neg		1859	252.088						no	88.5191	No
X - 19823			47360	LC/MS Neg		1563	267.099						yes	97.4787	No
X - 20529			46999	LC/MS Neg		2965	245.094						no	270.185	No
X - 21258			46259	LC/MS Neg		3915	213.023						yes	195.604	Yes
X - 21285			46294	LC/MS Neg		4500	365.143						no	82.4284	No
X - 21286			46295	LC/MS Neg		1550	164.036						yes	85.9923	Yes
X - 21295			46316	LC/MS Neg		1526	218.997						no	198.301	No
X - 21310			46354	LC/MS Neg		2235.2	233.985						no	67.2502	Yes
X - 21312			46356	LC/MS Neg		2757.7	243.034						no	164.905	Yes
X - 21315			46359	LC/MS Neg		3698.1	240.914						no	428.789	No
X - 21318			46362	LC/MS Neg		4186.6	237.023						no	79.7183	No
X - 21319			46363	LC/MS Neg		4238.4	165.092						yes	81.1059	Yes
X - 21339			46384	LC/MS Neg		5105	453.323						yes	59.6966	Yes
X - 21341			46386	LC/MS Neg		5126	366.901						no	913.74	No
X - 21343			46388	LC/MS Neg		5153	195.139						yes	64.2723	No
X - 21353			46398	LC/MS Neg		5196	239.166						yes	83.9635	Yes
X - 21358			46403	LC/MS Neg		5217	498.93						yes	81.5112	No
X - 21364			46409	LC/MS Neg		3757	213.086						yes	677.809	Yes
X - 21365			46410	LC/MS Pos Early		2195	160.133						yes	55.2752	No
X - 21410			46455	LC/MS Neg		3921	385.17						no	135.311	No
X - 21411			46456	LC/MS Neg		3956	157.087						yes	68.5912	No
X - 21441			46486	LC/MS Neg		3025.4	294.113						yes	94.5258	Yes
X - 21442			46487	LC/MS Neg		3823	333.208						no	195.421	Yes
X - 21448			46493	LC/MS Neg		3097.9	317.115						yes	131.536	No
X - 21458			46503	LC/MS Neg		4010	478.199						no	140.932	No
X - 21467			46512	LC/MS Neg		4041	262.621						yes	76.2236	Yes
X - 21470			46515	LC/MS Neg		3249	232.059						yes	427.402	Yes
X - 21471			46516	LC/MS Neg		4039	295.112						yes	103.548	Yes
X - 21474			46519	LC/MS Neg		4039	462.178						no	112.836	No
X - 21607			46674	LC/MS Neg		4529	167.108						yes	59.4286	Yes
X - 21626			46694	LC/MS Neg		2533	696.777						yes	67.7106	No
X - 21628			46696	LC/MS Neg		2270	697.267						yes	55.1064	No
X - 21657			46726	LC/MS Pos Early		3316	464.192						no	88.1641	No
X - 21658			46727	LC/MS Neg		5181	498.93						yes	109.239	No
X - 21659			46728	LC/MS Neg		3975	462.177						no	106.215	No
X - 21661			46730	LC/MS Neg		3034	259.009						yes	124.149	Yes
X - 21666			46740	LC/MS Neg		4822	391.286						yes	206.518	No
X - 21668			46742	LC/MS Neg		4772	464.302						no	159.943	No
X - 21669			46743	LC/MS Neg		4771	445.245						no	53.6031	No
X - 21729			46898	LC/MS Neg		1024	87.0453						yes	83.4277	No
X - 21733			46902	LC/MS Neg		2716	248.056						yes	85.6881	Yes
X - 21736			46905	LC/MS Neg		3345	183.139						yes	117.768	Yes
X - 21737			46906	LC/MS Neg		3461	245.013						no	290.997	No
X - 21740			46909	LC/MS Neg		3613	188.075						yes	41.1984	Yes
X - 21752			46923	LC/MS Neg		5090	621.331						no	140.392	No
X - 21785			46961	LC/MS Neg		765	189.041						yes	63.934	No
X - 21792			46968	LC/MS Neg		1290	197.083						yes	134.015	No
X - 21796			46972	LC/MS Neg		1625	138.057						yes	165.259	Yes
X - 21803			46980	LC/MS Neg		2035	212.003						no	482	No
X - 21807			46984	LC/MS Neg		2335	233.014						no	207.339	No
X - 21815			46992	LC/MS Neg		2620	279.1						no	289.96	No
X - 21816			46993	LC/MS Neg		2655	113.098						no	131.302	No
X - 21821			46998	LC/MS Neg		2930	243.078						no	511.35	Yes
X - 21834			47011	LC/MS Neg		3720	229.018						yes	135.272	Yes
X - 21838			47015	LC/MS Neg		3910	403.105						no	132.437	No
X - 21839			47016	LC/MS Neg		3925	452.194						no	281.89	No
X - 21842			47019	LC/MS Neg		3990	277.022						no	153.594	No
X - 21844			47021	LC/MS Neg		4010	220.099						no	121.192	No
X - 21845			47022	LC/MS Neg		4085	356.119						no	201.588	No
X - 21849			47026	LC/MS Neg		4340	222.114						no	106.947	No
X - 21851			47028	LC/MS Neg		4440	509.277						no	89.9726	Yes
X - 22102			47348	LC/MS Neg		2603	202.109						yes	96.1861	No
X - 22145			47391	LC/MS Neg		1844	257.078						yes	41.7988	No
X - 22162			47417	LC/MS Pos Early		960	150.058						yes	98.7248	Yes
X - 22379			47640	LC/MS Neg		4968	465.25						yes	304.796	No
X - 22475			47739	LC/MS Pos Early		2412	286.128						no	229.416	No
X - 22508			47772	LC/MS Neg		1758	324.073						no	214.877	No
X - 22509			47773	LC/MS Neg		3562	473.146						no	347.321	No
X - 22515			47779	LC/MS Neg		3869	345.156						no	1584.89	No
X - 22520			47784	LC/MS Neg		4389	263.628						no	184.988	No
X - 22716			48018	LC/MS Neg		4722	464.302						no	456.431	No
X - 22764			48067	LC/MS Neg		5263	197.155						yes	79.0411	No
X - 22775			48080	LC/MS Neg		2980	154.991						yes	23.6095	No
X - 22834			48185	LC/MS Neg		5095	448.308						no	96.5491	No
X - 23159			48773	LC/MS Neg		4548	235.117						no	125.792	No
X - 23291			48989	LC/MS Neg		3478	201.023						yes	297.824	No
X - 23293			48992	LC/MS Neg		4886	169.123						yes	75.7902	No
X - 23294			48993	LC/MS Neg		4856	169.123						no	55.8045	No
X - 23295			48994	LC/MS Neg		4807	169.123						yes	64.5536	No
X - 23296			48995	LC/MS Neg		4929	169.123						no	64.5361	No
X - 23297			48996	LC/MS Neg		4976	169.123						yes	64.692	No
X - 23314			49014	LC/MS Neg		1578.3	207.087						yes	173.2	No
X - 23369			49228	LC/MS Neg		2150	188.035						yes	59.9336	No
X - 23587			49463	LC/MS Pos Early		1230	132.102						no	190.828	Yes
X - 23637			49513	LC/MS Pos Early		1382	235.092						yes	220.267	No
X - 23639			49515	LC/MS Pos Early		1640	134.081						yes	45.1057	Yes
X - 23644			49521	LC/MS Pos Early		983	146.081						yes	198.034	Yes
X - 23648			49525	LC/MS Pos Early		1656	262.103						no	155.284	Yes
X - 23649			49526	LC/MS Pos Early		1645	272.076						no	239.371	No
X - 23652			49529	LC/MS Pos Early		1991	171.076						yes	293.843	No
X - 23659			49536	LC/MS Pos Early		2449	143.118						yes	232.061	No
X - 23666			49543	LC/MS Pos Early		2990	159.149						no	198.679	No
X - 23669			49546	LC/MS Pos Early		3122	319.165						no	112.6	No
X - 23671			49548	LC/MS Pos Early		3200	360.101						no	89.4067	No
X - 23679			49556	LC/MS Pos Late		1029	389.162						no	121.582	No
X - 23680			49557	LC/MS Pos Late		1049	338.232						yes	151.118	No
X - 23690			49568	LC/MS Pos Late		733	510.304						no	334.787	No
X - 23749			49647	LC/MS Pos Late		1916	568.428						yes	52.1815	No
X - 23756			49654	LC/MS Pos Late		1179	456.332						yes	282.562	No
X - 23765			49663	LC/MS Pos Late		2522	552.432						yes	99.9284	No
X - 23782			49681	LC/MS Pos Late		1627	349.273						yes	65.5562	Yes
X - 23786			49687	LC/MS Neg		5247	529.338						no	58.9287	No
X - 23787			49688	LC/MS Neg		4343	383.153						no	97.8267	No
X - 23997			52025	LC/MS Pos Early		1634	223.074						yes	92.7625	Yes
X - 24020			52049	LC/MS Pos Early		3064	188.175						yes	45.4248	No
X - 24024			52053	LC/MS Pos Late		2710	587.463						yes	114.263	No
X - 24041			52070	LC/MS Pos Late		2081	722.51						yes	92.3239	No
X - 24049			52078	LC/MS Pos Late		2211	768.589						yes	60.8607	No
X - 24054			52083	LC/MS Pos Late		2345	726.541						yes	44.7842	No
X - 24061			52090	LC/MS Pos Late		2400	720.587						yes	36.865	No
X - 24097			52126	LC/MS Pos Late		1954	704.521						yes	78.8055	No
X - 24125			52154	LC/MS Pos Late		2670	608.523						yes	71.2933	No
X - 24204			52238	LC/MS Pos Late		2870	564.534						yes	46.6693	No
X - 24240			52278	LC/MS Pos Early		2784	276.155						yes	45.7249	No
X - 24241			52280	LC/MS Pos Early		2239	186.112						yes	58.5567	Yes
X - 24261			52316	LC/MS Pos Late		2516	632.525						yes	75.7858	No
X - 24263			52318	LC/MS Pos Late		2608	658.54						yes	72.5329	No
X - 24278			52413	LC/MS Pos Late		2550	658.54						yes	65.6739	No
X - 24286			52424	LC/MS Pos Late		3043	584.524						yes	100.088	No
X - 24287			52425	LC/MS Pos Late		3164	584.524						yes	99.4933	No
X - 24293			52297	LC/MS Pos Early		1189	226.128						yes	244.05	No
X - 24295			52483	LC/MS Neg		1152	217.071						yes	118.134	Yes
X - 24309			52504	LC/MS Neg		4430	321.148						yes	50.262	Yes
X - 24334			52530	LC/MS Neg		1860	415.183						no	119.544	Yes
X - 24337			52533	LC/MS Neg		1980.6	239.079						yes	62.1839	Yes
X - 24339			52535	LC/MS Neg		2218.8	363.076						no	423.363	No
X - 24348			52544	LC/MS Neg		4309.4	299.639						yes	111.739	No
X - 24352			52548	LC/MS Neg		4453.4	419.229						no	169.103	No
X - 24387			52329	LC/MS Pos Early		2221	355.113						no	241.426	No
X - 24438			52670	LC/MS Pos Late		2263	768.59						yes	55.5384	No
X - 24439			52671	LC/MS Pos Late		2395	726.543						yes	55.9377	No
X - 24449			52766	LC/MS Pos Early		1678	305.145						yes	66.8933	No
X - 24452			52769	LC/MS Pos Early		2756	205.155						yes	183.594	No
X - 24455			52772	LC/MS Pos Early		2641	237.087						no	64.8891	No
X - 24456			52773	LC/MS Pos Early		2538	237.087						no	126.325	Yes
X - 24472			52789	LC/MS Pos Early		2064	173.139						yes	33.5283	No
X - 24512			52833	LC/MS Pos Early		1025	190.082						yes	49.3612	No
X - 24513			52834	LC/MS Pos Early		1148	149.056						yes	92.426	No
X - 24527			52848	LC/MS Pos Early		2221	243.134						no	149.034	No
X - 24529			52850	LC/MS Pos Early		2637	564.359						no	54.5958	No
X - 24542			52863	LC/MS Neg		1674	224.057						yes	673.118	No
X - 24544			52865	LC/MS Neg		4448	411.184						yes	61.9753	Yes
X - 24546			52867	LC/MS Neg		3289	231.051						no	518.593	Yes
X - 24549			52870	LC/MS Neg		2610	202.051						yes	100.393	No
X - 24570			52891	LC/MS Neg		3105	211.019						no	#DIV/0!	No
X - 24571			52892	LC/MS Neg		4625	303.145						no	779.213	No
X - 24572			52893	LC/MS Neg		2838	253.029						no	#DIV/0!	No
X - 24576			52897	LC/MS Neg		3184	246.95						no	330.564	No
X - 24585			52906	LC/MS Pos Early		2613	251.139						yes	76.159	No
X - 24588			52909	LC/MS Neg		2350	485.167						yes	55.4963	Yes
X - 24608			53023	LC/MS Neg		3408.4	174.056						yes	172.452	Yes
X - 24622			53049	LC/MS Neg		1156.5	665.214						no	#DIV/0!	No
X - 24637			53065	LC/MS Neg		2141.8	262.013						no	422.976	No
X - 24655			53083	LC/MS Neg		3598.9	349.002						no	404.258	No
X - 24669			53097	LC/MS Neg		4512	287.612						no	303.162	Yes
X - 24678			53106	LC/MS Pos Early		1134	310.113						yes	103.458	No
X - 24699			53127	LC/MS Pos Early		2402.3	241.154						yes	111.508	No
X - 24718			53146	LC/MS Pos Early		1124	282.118						yes	87.645	No
X - 24728			53157	LC/MS Pos Early		1431	238.038						yes	162.764	No
X - 24736			53172	LC/MS Pos Early		2821	189.135						no	68.2113	No
X - 24738			53214	LC/MS Pos Early		1051	160.097						yes	190.19	No
X - 24747			53266	LC/MS Neg		4360	321.147						yes	73.5213	Yes
X - 24748			53267	LC/MS Neg		4596	321.147						yes	119.816	Yes
X - 24749			53268	LC/MS Neg		6024	438.299						yes	63.8249	No

## Sheet: Supp_Table2
Supplementary Table 2: Regression Results of T2D and BMI
					T2D			BMI
Metabolite	R Name	pathway	subpathway	DF	Beta	SE	Pval	Beta	SE	Pval
1,5-anhydroglucitol (1,5-AG)	X1.5.anhydroglucitol..1.5.AG.	Carbohydrate	Glycolysis, Gluconeogenesis, and Pyruvate Metabolism	962	-1.19788	0.0630924	1.62661e-68	0.00606395	0.00423202	0.152219
X - 24678	X...24678	NA	NA	960	1.07948	0.0611826	1.46679e-60	0.0102873	0.00410327	0.0123366
mannose	mannose	Carbohydrate	Fructose, Mannose and Galactose Metabolism	961	0.925604	0.0592696	3.62869e-49	0.0160202	0.00397497	6.01173e-05
glucose	glucose	Carbohydrate	Glycolysis, Gluconeogenesis, and Pyruvate Metabolism	961	0.905384	0.0627274	6.88427e-43	0.00658983	0.0042055	0.117454
X - 11537	X...11537	NA	NA	960	-0.935212	0.0677975	1.2696e-39	-0.00782934	0.00453799	0.0847975
gluconate	gluconate	Xenobiotics	Food Component/Plant	944	0.84651	0.0642307	1.56661e-36	0.00776543	0.00431577	0.072288
palmitoylcholine	palmitoylcholine	Lipid	Fatty Acid Metabolism (Acyl Choline)	958	-0.899	0.0693427	1.563e-35	-0.00247309	0.00464102	0.594243
X - 24718	X...24718	NA	NA	959	0.841935	0.0678528	6.79005e-33	-0.00871255	0.00455231	0.0559336
arachidonoylcholine	arachidonoylcholine	Lipid	Phospholipid Metabolism	954	-0.856102	0.070875	2.32405e-31	0.00236643	0.00474719	0.618254
oleoylcholine	oleoylcholine	Lipid	Phospholipid Metabolism	944	-0.839273	0.0704793	1.46475e-30	-0.00396712	0.00473889	0.402726
1-(1-enyl-palmitoyl)-GPC (P-16:0)*	X1..1.enyl.palmitoyl..GPC..P.16.0..	Lipid	Lysoplasmalogen	963	-0.813745	0.0691085	5.36336e-30	-0.00644151	0.00463488	0.164914
X - 11871	X...11871	NA	NA	890	-0.834115	0.0725002	1.17956e-28	-0.00347691	0.00489632	0.477824
ribonate	ribonate	Carbohydrate	Pentose Metabolism	949	0.75332	0.0688377	2.47986e-26	0.00476807	0.00462951	0.303305
X - 22102	X...22102	NA	NA	946	0.742376	0.0681181	3.8926e-26	0.010022	0.00458215	0.0289731
arabonate/xylonate	arabonate.xylonate	Carbohydrate	Pentose Metabolism	950	0.726174	0.067324	1.14298e-25	0.00153068	0.00450371	0.734029
sphingomyelin (d18:2/14:0, d18:1/14:1)*	sphingomyelin..d18.2.14.0..d18.1.14.1..	Lipid	Sphingolipid Metabolism	963	-0.700001	0.0658173	4.69605e-25	0.0241388	0.00441359	5.76225e-08
citrulline	citrulline	Amino Acid	Urea cycle; Arginine and Proline Metabolism	964	-0.735776	0.0703278	2.44859e-24	-0.0109622	0.00471839	0.0203707
X - 13529	X...13529	NA	NA	955	0.700251	0.0670294	2.90094e-24	0.0160202	0.00451213	0.000403303
1-(1-enyl-palmitoyl)-2-palmitoleoyl-GPC (P-16:0/16:1)*	X1..1.enyl.palmitoyl..2.palmitoleoyl.GPC..P.16.0.16.1..	Lipid	Plasmalogen	954	-0.728436	0.0700238	4.41705e-24	0.00632791	0.00468148	0.176795
N-acetyltaurine	N.acetyltaurine	Amino Acid	Methionine, Cysteine, SAM and Taurine Metabolism	958	-0.716261	0.0702144	2.88324e-23	0.00205403	0.00470897	0.662793
X - 18889	X...18889	NA	NA	943	0.683604	0.0677655	8.53958e-23	0.0172749	0.00454541	0.000153657
3-hydroxydecanoate	X3.hydroxydecanoate	Lipid	Fatty Acid, Monohydroxy	955	0.70922	0.0705147	1.09131e-22	0.0026274	0.00473013	0.578709
X - 11315	X...11315	NA	NA	925	-0.710075	0.0713508	3.09535e-22	-9.81718e-05	0.00478431	0.983633
sphingomyelin (d18:2/24:1, d18:1/24:2)*	sphingomyelin..d18.2.24.1..d18.1.24.2..	Lipid	Sphingolipid Metabolism	964	-0.70192	0.0706911	3.45185e-22	0.00428553	0.00474277	0.366437
inosine	inosine	Nucleotide	Purine Metabolism, (Hypo)Xanthine/Inosine containing	963	-0.638799	0.0670913	1.33227e-20	-0.00394506	0.00450148	0.381035
X - 15497	X...15497	NA	NA	961	0.642494	0.0680459	2.67964e-20	0.0140071	0.00456502	0.00221284
2'-deoxyuridine	X2..deoxyuridine	Nucleotide	Pyrimidine Metabolism, Uracil containing	922	-0.590866	0.0640129	1.80039e-19	-0.00516373	0.00429567	0.229642
dihomo-linolenoyl-choline	dihomo.linolenoyl.choline	Lipid	Phospholipid Metabolism	882	-0.691807	0.0755777	3.7467e-19	0.00306526	0.00504409	0.543547
3-hydroxyoctanoate	X3.hydroxyoctanoate	Lipid	Fatty Acid, Monohydroxy	950	0.661759	0.0724195	3.76201e-19	-0.00440685	0.00485329	0.364102
1,2-distearoyl-GPC (18:0/18:0)	X1.2.distearoyl.GPC..18.0.18.0.	Lipid	Phospholipid Metabolism	923	-0.661215	0.0730171	7.91301e-19	-0.00299696	0.00491489	0.542163
fructose	fructose	Carbohydrate	Fructose, Mannose and Galactose Metabolism	963	0.618626	0.0710007	1.27423e-17	0.00321363	0.00475888	0.499652
cysteine-glutathione disulfide	cysteine.glutathione.disulfide	Amino Acid	Glutathione Metabolism	902	-0.575914	0.0661161	1.42579e-17	-0.0140494	0.0045655	0.00215201
1-linoleoyl-GPC (18:2)	X1.linoleoyl.GPC..18.2.	Lipid	Lysolipid	964	-0.595567	0.0689805	2.4244e-17	-0.0215419	0.004628	3.69834e-06
X - 17166	X...17166	NA	NA	956	-0.574242	0.0671922	4.97566e-17	0.0167917	0.00453007	0.000222018
cys-gly, oxidized	cys.gly..oxidized	Amino Acid	Glutathione Metabolism	877	-0.55485	0.0649666	5.85231e-17	0.00669731	0.00439912	0.128264
leucylalanine	leucylalanine	Peptide	Dipeptide	914	-0.609341	0.0717922	8.44414e-17	0.00124897	0.00486255	0.797348
7-methylguanine	X7.methylguanine	Nucleotide	Purine Metabolism, Guanine containing	957	-0.616034	0.0727516	9.33035e-17	0.00183364	0.00492445	0.709711
glutamine	glutamine	Amino Acid	Glutamate Metabolism	962	-0.607132	0.071747	9.6868e-17	-0.0221698	0.00481386	4.66912e-06
docosahexaenoylcholine	docosahexaenoylcholine	Lipid	Phospholipid Metabolism	808	-0.671239	0.079343	1.24668e-16	-0.0027423	0.00528172	0.60376
lactosyl-N-palmitoyl-sphingosine	lactosyl.N.palmitoyl.sphingosine	Lipid	Sphingolipid Metabolism	963	-0.595106	0.0712384	2.28807e-16	0.00482412	0.0047754	0.312652
5-bromotryptophan	X5.bromotryptophan	Amino Acid	Phenylalanine and Tyrosine Metabolism	940	-0.598378	0.0717466	2.62089e-16	0.00267602	0.00483849	0.580347
2-hydroxybutyrate/2-hydroxyisobutyrate	X2.hydroxybutyrate.2.hydroxyisobutyrate	Amino Acid	Methionine, Cysteine, SAM and Taurine Metabolism	959	0.588566	0.0712451	4.76005e-16	0.0151209	0.00479115	0.00164935
1-(1-enyl-palmitoyl)-2-oleoyl-GPC (P-16:0/18:1)*	X1..1.enyl.palmitoyl..2.oleoyl.GPC..P.16.0.18.1..	Lipid	Plasmalogen	963	-0.591751	0.0719395	6.24941e-16	-0.0156915	0.0048283	0.00119447
guanidinoacetate	guanidinoacetate	Amino Acid	Creatine Metabolism	959	-0.526012	0.0643797	9.64268e-16	-0.00157273	0.00433877	0.717071
1-(1-enyl-palmitoyl)-2-linoleoyl-GPC (P-16:0/18:2)*	X1..1.enyl.palmitoyl..2.linoleoyl.GPC..P.16.0.18.2..	Lipid	Plasmalogen	961	-0.579458	0.0711385	1.1673e-15	-0.0179964	0.00478059	0.000177031
taurine	taurine	Amino Acid	Methionine, Cysteine, SAM and Taurine Metabolism	962	-0.572193	0.0709568	2.18417e-15	0.00725733	0.00477984	0.129262
X - 24608	X...24608	NA	NA	901	0.532274	0.0664945	3.67555e-15	0.0113085	0.00448136	0.0117918
glutamate	glutamate	Amino Acid	Glutamate Metabolism	960	0.512613	0.0646246	5.96977e-15	0.0219408	0.00434184	5.19688e-07
1-(1-enyl-oleoyl)-GPE (P-18:1)*	X1..1.enyl.oleoyl..GPE..P.18.1..	Lipid	Lysoplasmalogen	960	-0.559293	0.0708821	8.17535e-15	-0.00481277	0.00475003	0.311215
pyroglutamine*	pyroglutamine.	Amino Acid	Glutamate Metabolism	961	-0.506726	0.0643	8.79352e-15	0.00263495	0.00430821	0.54094
1-stearoyl-GPC (18:0)	X1.stearoyl.GPC..18.0.	Lipid	Lysolipid	964	-0.563798	0.0716249	9.38854e-15	-0.00305739	0.00480541	0.524772
sphingosine	sphingosine	Lipid	Sphingolipid Metabolism	941	0.530819	0.0681317	1.75231e-14	0.0158389	0.00466981	0.000723374
sphingomyelin (d18:1/24:1, d18:2/24:0)*	sphingomyelin..d18.1.24.1..d18.2.24.0..	Lipid	Sphingolipid Metabolism	962	-0.561792	0.0724255	2.2147e-14	0.000270435	0.00486143	0.955649
1-(1-enyl-palmitoyl)-GPE (P-16:0)*	X1..1.enyl.palmitoyl..GPE..P.16.0..	Lipid	Lysoplasmalogen	963	-0.549434	0.0711441	2.84571e-14	-0.000531505	0.00477079	0.911316
N-acetylmethionine	N.acetylmethionine	Amino Acid	Methionine, Cysteine, SAM and Taurine Metabolism	953	-0.545554	0.0706373	2.86199e-14	-0.00230518	0.00471219	0.624816
X - 17179	X...17179	NA	NA	929	-0.539412	0.0700917	3.58613e-14	0.00579709	0.00473911	0.221548
1-(1-enyl-palmitoyl)-2-palmitoyl-GPC (P-16:0/16:0)*	X1..1.enyl.palmitoyl..2.palmitoyl.GPC..P.16.0.16.0..	Lipid	Plasmalogen	962	-0.551392	0.0722078	5.38754e-14	-0.000367029	0.00484864	0.939676
X - 24728	X...24728	NA	NA	782	0.576538	0.0753024	5.64816e-14	0.0147019	0.00498473	0.00327899
malate	malate	Energy	TCA Cycle	949	0.524933	0.069374	9.04105e-14	0.00490743	0.00466291	0.292865
X - 14364	X...14364	NA	NA	940	0.479629	0.0634313	9.47003e-14	0.0142542	0.00423524	0.000794629
X - 24449	X...24449	NA	NA	947	-0.549038	0.0726889	9.98467e-14	-0.00834713	0.00493863	0.0913242
sphingomyelin (d18:1/20:1, d18:2/20:0)*	sphingomyelin..d18.1.20.1..d18.2.20.0..	Lipid	Sphingolipid Metabolism	963	-0.532575	0.0709943	1.43024e-13	0.0142851	0.00476817	0.00280614
1-stearoyl-GPI (18:0)	X1.stearoyl.GPI..18.0.	Lipid	Lysolipid	959	-0.54839	0.0733857	1.76717e-13	0.00495667	0.00492457	0.31442
DSGEGDFXAEGGGVR*	DSGEGDFXAEGGGVR.	Peptide	Fibrinogen Cleavage Peptide	926	-0.506138	0.0681729	2.56782e-13	0.00679182	0.00461929	0.141815
sphingomyelin (d18:2/23:0, d18:1/23:1, d17:1/24:1)*	sphingomyelin..d18.2.23.0..d18.1.23.1..d17.1.24.1..	Lipid	Sphingolipid Metabolism	960	-0.535042	0.072333	3.03624e-13	0.00127547	0.00484513	0.792416
sphingomyelin (d18:2/16:0, d18:1/16:1)*	sphingomyelin..d18.2.16.0..d18.1.16.1..	Lipid	Sphingolipid Metabolism	962	-0.527374	0.0715515	3.65697e-13	0.0202598	0.00479831	2.64778e-05
aspartate	aspartate	Amino Acid	Alanine and Aspartate Metabolism	960	0.485002	0.0658259	3.731e-13	0.0133527	0.00442832	0.00263485
oxalate (ethanedioate)	oxalate..ethanedioate.	Cofactors and Vitamins	Ascorbate and Aldarate Metabolism	962	-0.482012	0.0656399	4.43704e-13	-0.0157023	0.00439672	0.000372712
3-aminoisobutyrate	X3.aminoisobutyrate	Nucleotide	Pyrimidine Metabolism, Thymine containing	943	-0.529155	0.0730801	9.2552e-13	-0.00905587	0.00490519	0.0651791
1-palmitoyl-2-arachidonoyl-GPE (16:0/20:4)*	X1.palmitoyl.2.arachidonoyl.GPE..16.0.20.4..	Lipid	Phospholipid Metabolism	962	0.504739	0.0698697	1.02611e-12	0.00585955	0.00467978	0.210837
X - 24061	X...24061	NA	NA	961	-0.516374	0.0714799	1.02643e-12	-0.000599738	0.00480087	0.900611
X - 12101	X...12101	NA	NA	843	0.538783	0.0747471	1.26135e-12	0.00330479	0.0049089	0.50099
S-adenosylhomocysteine (SAH)	S.adenosylhomocysteine..SAH.	Amino Acid	Methionine, Cysteine, SAM and Taurine Metabolism	872	0.501869	0.0698154	1.40772e-12	0.0126204	0.00462457	0.00648056
1-palmitoyl-2-oleoyl-GPE (16:0/18:1)	X1.palmitoyl.2.oleoyl.GPE..16.0.18.1.	Lipid	Phospholipid Metabolism	962	0.517692	0.0722036	1.49492e-12	0.0103394	0.00484186	0.0329782
sphingomyelin (d18:1/22:1, d18:2/22:0, d16:1/24:1)*	sphingomyelin..d18.1.22.1..d18.2.22.0..d16.1.24.1..	Lipid	Sphingolipid Metabolism	958	-0.512963	0.0721095	2.21069e-12	0.00743914	0.00483134	0.123947
X - 24749	X...24749	NA	NA	869	-0.532685	0.0748032	2.24399e-12	-0.0109092	0.00506806	0.0316288
pipecolate	pipecolate	Amino Acid	Lysine Metabolism	944	0.518619	0.0729876	2.35971e-12	0.00803137	0.00487539	0.0998236
X - 11381	X...11381	NA	NA	961	-0.512646	0.0722372	2.4794e-12	0.000119592	0.00484729	0.980322
1-palmitoyl-2-linoleoyl-glycerol (16:0/18:2)*	X1.palmitoyl.2.linoleoyl.glycerol..16.0.18.2..	Lipid	Diacylglycerol	963	0.490826	0.0694614	3.05305e-12	0.0134854	0.00465618	0.00386212
3-hydroxymyristate	X3.hydroxymyristate	Lipid	Fatty Acid, Monohydroxy	918	0.521155	0.0740997	3.94343e-12	0.00188864	0.00491491	0.700869
3-hydroxylaurate	X3.hydroxylaurate	Lipid	Fatty Acid, Monohydroxy	954	0.508469	0.0731283	6.62293e-12	0.00208986	0.00492759	0.671579
palmitoyl sphingomyelin (d18:1/16:0)	palmitoyl.sphingomyelin..d18.1.16.0.	Lipid	Sphingolipid Metabolism	961	-0.507736	0.0733804	8.28485e-12	0.00235527	0.00491203	0.631699
palmitoyl dihydrosphingomyelin (d18:0/16:0)*	palmitoyl.dihydrosphingomyelin..d18.0.16.0..	Lipid	Sphingolipid Metabolism	961	-0.495001	0.0721903	1.25781e-11	0.00359701	0.00483713	0.457285
3-hydroxybutyrate (BHBA)	X3.hydroxybutyrate..BHBA.	Lipid	Ketone Bodies	953	0.497919	0.0728621	1.47451e-11	-0.00266303	0.00490213	0.587092
glycerophosphorylcholine (GPC)	glycerophosphorylcholine..GPC.	Lipid	Phospholipid Metabolism	957	-0.500047	0.0739872	2.41904e-11	-0.00380053	0.00495538	0.443301
dihydroorotate	dihydroorotate	Nucleotide	Pyrimidine Metabolism, Orotate containing	847	-0.48422	0.0720349	3.2913e-11	0.00672077	0.00490744	0.171204
X - 14314	X...14314	NA	NA	926	0.444114	0.0662127	3.44433e-11	0.0086047	0.00454478	0.0586276
X - 14095	X...14095	NA	NA	917	0.413956	0.0623519	5.39981e-11	0.0112993	0.00417995	0.0069943
erythronate*	erythronate.	Carbohydrate	Aminosugar Metabolism	946	0.454102	0.0689073	7.29229e-11	0.008448	0.00462891	0.0683085
X - 24049	X...24049	NA	NA	777	-0.524254	0.0798199	9.33391e-11	-0.00953935	0.00522585	0.0683222
1-arachidonoyl-GPC (20:4n6)*	X1.arachidonoyl.GPC..20.4n6..	Lipid	Lysolipid	964	-0.484602	0.0744889	1.24061e-10	0.00244483	0.00499757	0.624808
1-palmitoyl-GPI (16:0)*	X1.palmitoyl.GPI..16.0..	Lipid	Lysolipid	958	-0.481077	0.0739531	1.24845e-10	0.0113071	0.00496071	0.0228669
gamma-glutamylglutamate	gamma.glutamylglutamate	Peptide	Gamma-glutamyl Amino Acid	958	0.413088	0.0639627	1.68161e-10	0.00993073	0.00427632	0.0204276
gamma-glutamylisoleucine*	gamma.glutamylisoleucine.	Peptide	Gamma-glutamyl Amino Acid	959	0.438131	0.0679238	1.76742e-10	0.0125624	0.0045507	0.00588066
1-linoleoyl-GPI (18:2)*	X1.linoleoyl.GPI..18.2..	Lipid	Lysolipid	962	-0.469212	0.0727629	1.78528e-10	-0.001197	0.00487964	0.806272
sphingomyelin (d18:1/15:0, d16:1/17:0)*	sphingomyelin..d18.1.15.0..d16.1.17.0..	Lipid	Sphingolipid Metabolism	959	-0.475446	0.0740167	2.09348e-10	0.00437652	0.00497331	0.379079
N-acetyltyrosine	N.acetyltyrosine	Amino Acid	Phenylalanine and Tyrosine Metabolism	918	-0.47918	0.0750562	2.73045e-10	0.023321	0.00508358	5.10788e-06
sphinganine	sphinganine	Lipid	Sphingolipid Metabolism	925	0.436799	0.0688405	3.47534e-10	0.0112002	0.0046871	0.0170675
1-stearoyl-2-arachidonoyl-GPE (18:0/20:4)	X1.stearoyl.2.arachidonoyl.GPE..18.0.20.4.	Lipid	Phospholipid Metabolism	962	0.444354	0.0708211	5.30175e-10	0.00996935	0.00474585	0.0359316
glycerophosphoinositol*	glycerophosphoinositol.	Lipid	Phospholipid Metabolism	909	-0.472064	0.0760116	8.03052e-10	-0.00519734	0.00513163	0.311423
X - 16134	X...16134	NA	NA	873	-0.444312	0.0717036	8.88787e-10	0.00720645	0.00487376	0.139602
3-hydroxy-3-methylglutarate	X3.hydroxy.3.methylglutarate	Lipid	Mevalonate Metabolism	951	0.436373	0.0705027	8.96468e-10	0.00169852	0.00472704	0.719436
1-oleoyl-GPC (18:1)	X1.oleoyl.GPC..18.1.	Lipid	Lysolipid	963	-0.450756	0.0729575	9.54669e-10	-0.0152406	0.00489303	0.00189538
gamma-glutamylglutamine	gamma.glutamylglutamine	Peptide	Gamma-glutamyl Amino Acid	962	-0.436695	0.0707173	9.73305e-10	-0.0212563	0.00474281	8.2916e-06
gamma-glutamylvaline	gamma.glutamylvaline	Peptide	Gamma-glutamyl Amino Acid	954	0.427039	0.0692875	1.04995e-09	0.0176982	0.00464592	0.000148208
1-palmitoleoyl-2-linoleoyl-GPC (16:1/18:2)*	X1.palmitoleoyl.2.linoleoyl.GPC..16.1.18.2..	Lipid	Phospholipid Metabolism	954	-0.441849	0.0720372	1.25681e-09	-0.00606105	0.0048433	0.211084
pro-hydroxy-pro	pro.hydroxy.pro	Amino Acid	Urea cycle; Arginine and Proline Metabolism	952	-0.446008	0.0730584	1.4967e-09	-0.00698348	0.00491676	0.155836
X - 16580	X...16580	NA	NA	952	0.43909	0.0722415	1.7577e-09	0.00813916	0.00483004	0.0922948
3-methoxytyrosine	X3.methoxytyrosine	Amino Acid	Phenylalanine and Tyrosine Metabolism	947	-0.456136	0.0750728	1.78413e-09	-0.0047835	0.00506503	0.345198
X - 17167	X...17167	NA	NA	874	-0.430395	0.0708325	1.83497e-09	0.00127934	0.00480901	0.790278
glycylvaline	glycylvaline	Peptide	Dipeptide	950	0.405988	0.0669797	1.94455e-09	0.00805149	0.00447204	0.0721138
X - 21628	X...21628	NA	NA	933	-0.418171	0.0691016	2.07559e-09	0.00182115	0.0046373	0.694617
X - 16123	X...16123	NA	NA	877	-0.441287	0.0733848	2.66503e-09	0.013773	0.00499979	0.00599586
X - 17335	X...17335	NA	NA	896	0.450707	0.075236	3.02558e-09	0.00364114	0.0051015	0.475574
glycerophosphoethanolamine	glycerophosphoethanolamine	Lipid	Phospholipid Metabolism	957	-0.442795	0.0741623	3.32748e-09	-0.0077682	0.00499282	0.120069
1-palmitoleoyl-GPC (16:1)*	X1.palmitoleoyl.GPC..16.1..	Lipid	Lysolipid	961	-0.428209	0.072129	4.0579e-09	0.0108561	0.00483932	0.025104
phenylalanylglycine	phenylalanylglycine	Peptide	Dipeptide	792	-0.470374	0.0790869	4.08137e-09	-0.00754877	0.00535581	0.159094
mannitol/sorbitol	mannitol.sorbitol	Carbohydrate	Fructose, Mannose and Galactose Metabolism	942	0.424015	0.0714753	4.19125e-09	8.41041e-05	0.00479943	0.986022
choline phosphate	choline.phosphate	Lipid	Phospholipid Metabolism	918	-0.429386	0.073145	6.07216e-09	-0.00802432	0.00492887	0.103863
sphingomyelin (d18:1/18:1, d18:2/18:0)	sphingomyelin..d18.1.18.1..d18.2.18.0.	Lipid	Sphingolipid Metabolism	962	-0.409283	0.0697999	6.21922e-09	0.0300643	0.00468744	2.22246e-10
isovalerate	isovalerate	Amino Acid	Leucine, Isoleucine and Valine Metabolism	959	0.430127	0.0733627	6.24842e-09	-0.006731	0.00491927	0.171541
X - 12206	X...12206	NA	NA	948	0.401704	0.0689797	7.88504e-09	0.00937712	0.0046479	0.0439252
S-methylcysteine	S.methylcysteine	Amino Acid	Methionine, Cysteine, SAM and Taurine Metabolism	954	-0.426243	0.0736686	9.77226e-09	-0.0133989	0.00493276	0.00672097
bilirubin (E,Z or Z,E)*	bilirubin..E.Z.or.Z.E..	Cofactors and Vitamins	Hemoglobin and Porphyrin Metabolism	867	-0.415109	0.0718894	1.07627e-08	-0.00640626	0.00485554	0.187393
3-hydroxystearate	X3.hydroxystearate	Lipid	Fatty Acid, Monohydroxy	785	0.47394	0.0821005	1.12334e-08	0.00245576	0.00546788	0.653465
adenine	adenine	Nucleotide	Purine Metabolism, Adenine containing	929	-0.410389	0.0716399	1.36816e-08	0.0098569	0.00480065	0.0403285
1-palmitoylglycerol (16:0)	X1.palmitoylglycerol..16.0.	Lipid	Monoacylglycerol	950	0.412174	0.0723112	1.59829e-08	0.0132394	0.00483397	0.00628148
X - 24286	X...24286	NA	NA	920	0.41261	0.072604	1.77569e-08	0.0230791	0.00491626	3.07965e-06
X - 14384	X...14384	NA	NA	927	-0.414188	0.073185	2.02366e-08	0.00704952	0.00496572	0.156049
1-(1-enyl-stearoyl)-GPE (P-18:0)*	X1..1.enyl.stearoyl..GPE..P.18.0..	Lipid	Lysoplasmalogen	947	-0.405496	0.0720951	2.44913e-08	-0.00909179	0.00483207	0.0602032
X - 21365	X...21365	NA	NA	956	0.405692	0.0721835	2.50079e-08	0.0036762	0.00485273	0.448905
erythritol	erythritol	Xenobiotics	Food Component/Plant	939	0.385873	0.0686478	2.50198e-08	0.0054503	0.00462057	0.238469
3-hydroxyisobutyrate	X3.hydroxyisobutyrate	Amino Acid	Leucine, Isoleucine and Valine Metabolism	955	0.401754	0.0715155	2.53762e-08	0.0153319	0.00481615	0.0015025
1-palmitoyl-3-linoleoyl-glycerol (16:0/18:2)*	X1.palmitoyl.3.linoleoyl.glycerol..16.0.18.2..	Lipid	Diacylglycerol	963	0.397358	0.0708693	2.68986e-08	0.015559	0.00475299	0.00109995
1-oleoyl-GPI (18:1)*	X1.oleoyl.GPI..18.1..	Lipid	Lysolipid	955	-0.412715	0.0738847	3.03068e-08	-0.000828898	0.00495701	0.867234
X - 13553	X...13553	NA	NA	932	-0.408348	0.073126	3.08042e-08	0.00681384	0.00488766	0.163622
X - 16132	X...16132	NA	NA	962	0.380008	0.0682852	3.39852e-08	0.0276618	0.00461053	2.79592e-09
1-arachidonoyl-GPI (20:4)*	X1.arachidonoyl.GPI..20.4..	Lipid	Lysolipid	961	-0.412533	0.0742402	3.55915e-08	0.0126626	0.00497874	0.0111356
X - 23659	X...23659	NA	NA	795	0.400175	0.0719595	3.66212e-08	-0.00761936	0.00483769	0.115654
glycosyl-N-palmitoyl-sphingosine	glycosyl.N.palmitoyl.sphingosine	Lipid	Sphingolipid Metabolism	961	-0.404609	0.0733621	4.47758e-08	-0.00194593	0.00492735	0.692987
vanillylmandelate (VMA)	vanillylmandelate..VMA.	Amino Acid	Phenylalanine and Tyrosine Metabolism	943	-0.391686	0.0710144	4.48983e-08	-0.00487454	0.00475796	0.305861
lactate	lactate	Carbohydrate	Glycolysis, Gluconeogenesis, and Pyruvate Metabolism	950	0.388114	0.0704029	4.55208e-08	0.0178873	0.00474626	0.000174201
X - 16087	X...16087	NA	NA	908	0.374938	0.0680261	4.63186e-08	0.0148984	0.00456243	0.00113381
X - 12410	X...12410	NA	NA	851	0.42129	0.0764878	4.81045e-08	-0.00930547	0.00507953	0.0673076
choline	choline	Lipid	Phospholipid Metabolism	954	0.374519	0.0681752	5.0559e-08	0.00473844	0.00459306	0.302497
1-(1-enyl-palmitoyl)-2-arachidonoyl-GPC (P-16:0/20:4)*	X1..1.enyl.palmitoyl..2.arachidonoyl.GPC..P.16.0.20.4..	Lipid	Plasmalogen	960	-0.403467	0.073968	6.24486e-08	0.00309872	0.00495016	0.531474
3-hydroxyhexanoate	X3.hydroxyhexanoate	Lipid	Fatty Acid, Monohydroxy	959	0.400698	0.0736999	6.88005e-08	0.00752629	0.00496728	0.130058
N-formylphenylalanine	N.formylphenylalanine	Amino Acid	Phenylalanine and Tyrosine Metabolism	926	0.394947	0.0731782	8.60858e-08	0.0110288	0.0049475	0.0260422
methyl glucopyranoside (alpha + beta)	methyl.glucopyranoside..alpha...beta.	Xenobiotics	Food Component/Plant	820	-0.430211	0.0801597	1.04312e-07	-0.00806845	0.00528926	0.127535
5,6-dihydrothymine	X5.6.dihydrothymine	Nucleotide	Pyrimidine Metabolism, Thymine containing	957	-0.398755	0.0745607	1.11228e-07	0.0182037	0.00500332	0.000289093
pseudouridine	pseudouridine	Nucleotide	Pyrimidine Metabolism, Uracil containing	942	-0.395512	0.0745376	1.39581e-07	0.00895532	0.00500409	0.0738394
X - 22145	X...22145	NA	NA	916	0.397792	0.0750704	1.45998e-07	-0.00503604	0.00502546	0.316558
N-acetylglutamine	N.acetylglutamine	Amino Acid	Glutamate Metabolism	915	-0.400828	0.0757205	1.50278e-07	-0.0040978	0.00517643	0.428784
gamma-glutamylleucine	gamma.glutamylleucine	Peptide	Gamma-glutamyl Amino Acid	961	0.349623	0.0660905	1.51449e-07	0.0132489	0.00443331	0.00287483
X - 21353	X...21353	NA	NA	961	0.390662	0.0740076	1.60893e-07	0.000525934	0.00496369	0.915639
X - 15492	X...15492	NA	NA	929	0.375331	0.0715123	1.90076e-07	0.0104595	0.00485354	0.0314163
X - 11522	X...11522	NA	NA	961	-0.360234	0.068798	2.01463e-07	-0.0015674	0.00462511	0.734768
docosatrienoate (22:3n3)	docosatrienoate..22.3n3.	Lipid	Polyunsaturated Fatty Acid (n3 and n6)	800	0.426441	0.0817097	2.29453e-07	0.000893887	0.00542659	0.869203
X - 24263	X...24263	NA	NA	955	0.37723	0.0727493	2.63212e-07	0.011057	0.00489529	0.0241275
X - 11429	X...11429	NA	NA	940	-0.384766	0.0744698	2.90905e-07	0.0119419	0.00499593	0.0170297
1-stearoyl-2-oleoyl-GPE (18:0/18:1)	X1.stearoyl.2.oleoyl.GPE..18.0.18.1.	Lipid	Phospholipid Metabolism	959	0.382134	0.0741291	3.08046e-07	0.00497358	0.0049644	0.31667
N-acetyltryptophan	N.acetyltryptophan	Amino Acid	Tryptophan Metabolism	950	-0.371195	0.0729	4.27512e-07	0.0103856	0.00486835	0.0331565
1-oleoylglycerol (18:1)	X1.oleoylglycerol..18.1.	Lipid	Monoacylglycerol	953	0.360222	0.0713246	5.28028e-07	0.00714267	0.00477565	0.135078
thioproline	thioproline	Amino Acid	Tryptophan Metabolism	962	-0.329253	0.0653284	5.56134e-07	-0.014737	0.00439744	0.000835712
N6-carboxymethyllysine	N6.carboxymethyllysine	Carbohydrate	Advanced Glycation End-product	871	0.375101	0.0747996	6.43525e-07	0.0037834	0.00497402	0.447083
urate	urate	Nucleotide	Purine Metabolism, (Hypo)Xanthine/Inosine containing	963	-0.348677	0.0701363	7.86554e-07	0.0311133	0.00470692	6.3505e-11
X - 11530	X...11530	NA	NA	961	-0.343222	0.0690491	7.89691e-07	-0.00206548	0.00464287	0.656512
prolylglycine	prolylglycine	Peptide	Dipeptide	857	0.3912	0.0790874	9.09708e-07	0.00541805	0.00529667	0.306636
margarate (17:0)	margarate..17.0.	Lipid	Long Chain Fatty Acid	958	0.362036	0.0741898	1.24291e-06	0.000687201	0.00497154	0.89009
1-palmitoyl-2-linoleoyl-GPE (16:0/18:2)	X1.palmitoyl.2.linoleoyl.GPE..16.0.18.2.	Lipid	Phospholipid Metabolism	958	0.359775	0.0739262	1.32656e-06	-0.000130648	0.00495486	0.97897
sphingomyelin (d18:1/17:0, d17:1/18:0, d19:1/16:0)	sphingomyelin..d18.1.17.0..d17.1.18.0..d19.1.16.0.	Lipid	Sphingolipid Metabolism	962	-0.361058	0.0742198	1.33864e-06	0.00858627	0.00498598	0.0853761
isobutyrylglycine	isobutyrylglycine	Amino Acid	Leucine, Isoleucine and Valine Metabolism	874	0.373291	0.0771313	1.53714e-06	0.00385879	0.00530824	0.467454
guanosine	guanosine	Nucleotide	Purine Metabolism, Guanine containing	803	-0.374185	0.0779875	1.91054e-06	0.00129298	0.00533033	0.808401
X - 12846	X...12846	NA	NA	891	0.345237	0.0721664	2.0114e-06	0.000929935	0.00480271	0.846512
4-hydroxyphenylacetate	X4.hydroxyphenylacetate	Amino Acid	Phenylalanine and Tyrosine Metabolism	846	0.376971	0.0788168	2.03809e-06	-0.00450193	0.00516689	0.383836
X - 19823	X...19823	NA	NA	834	-0.375809	0.0792174	2.46422e-06	0.0140531	0.00539954	0.00941503
cholesterol	cholesterol	Lipid	Sterol	962	-0.350885	0.0742733	2.65362e-06	-7.82331e-05	0.00499385	0.987504
1-linolenoyl-GPC (18:3)*	X1.linolenoyl.GPC..18.3..	Lipid	Lysolipid	955	-0.350495	0.0743243	2.76679e-06	-0.0116333	0.00497222	0.0195069
X - 12026	X...12026	NA	NA	942	-0.33817	0.0717498	2.80634e-06	0.0241263	0.00479902	5.95165e-07
threonylphenylalanine	threonylphenylalanine	Peptide	Dipeptide	946	-0.341553	0.0724719	2.80842e-06	0.00498026	0.00489552	0.309267
X - 15469	X...15469	NA	NA	942	0.348379	0.0745381	3.38678e-06	-0.000177734	0.00499323	0.971613
X - 16135	X...16135	NA	NA	813	-0.357291	0.0764282	3.4428e-06	0.0100782	0.0051701	0.0516006
X - 24020	X...24020	NA	NA	933	-0.351809	0.0755246	3.65282e-06	0.0140702	0.00504215	0.00536984
theobromine	theobromine	Xenobiotics	Xanthine Metabolism	955	-0.342233	0.0737551	3.96749e-06	0.00608245	0.00496171	0.220547
sphingomyelin (d18:1/20:0, d16:1/22:0)*	sphingomyelin..d18.1.20.0..d16.1.22.0..	Lipid	Sphingolipid Metabolism	959	-0.340914	0.0736663	4.20277e-06	0.0100961	0.00494165	0.0413188
leucine	leucine	Amino Acid	Leucine, Isoleucine and Valine Metabolism	961	0.33102	0.0717359	4.47559e-06	0.0118775	0.00480906	0.013691
X - 21471	X...21471	NA	NA	940	0.345852	0.075285	4.94245e-06	0.000251362	0.00502142	0.960087
tartronate (hydroxymalonate)	tartronate..hydroxymalonate.	Xenobiotics	Bacterial/Fungal	963	-0.317234	0.0691226	5.03199e-06	-0.0087422	0.00463366	0.0595048
N-methylproline	N.methylproline	Amino Acid	Urea cycle; Arginine and Proline Metabolism	958	-0.33401	0.0734135	6.0612e-06	-0.000460608	0.00491754	0.925394
glycerol	glycerol	Lipid	Glycerolipid Metabolism	962	0.310173	0.0682357	6.17471e-06	0.0325779	0.00457413	2.07883e-12
X - 21467	X...21467	NA	NA	957	0.328936	0.07278	6.9707e-06	0.0089384	0.00488952	0.0678496
carnitine	carnitine	Lipid	Carnitine Metabolism	963	-0.336254	0.0745439	7.25373e-06	0.00770143	0.00499911	0.123752
myristate (14:0)	myristate..14.0.	Lipid	Long Chain Fatty Acid	962	0.334601	0.0742468	7.39696e-06	0.00615079	0.00497951	0.21705
dopamine sulfate (2)	dopamine.sulfate..2.	Amino Acid	Phenylalanine and Tyrosine Metabolism	945	0.328327	0.0734068	8.66225e-06	-0.0082368	0.00491341	0.0939922
homoarginine	homoarginine	Amino Acid	Urea cycle; Arginine and Proline Metabolism	961	-0.315619	0.0712393	1.04866e-05	0.0196528	0.00476919	4.10168e-05
maltose	maltose	Carbohydrate	Glycogen Metabolism	820	0.345558	0.0779453	1.05407e-05	0.00751131	0.00524819	0.152748
X - 11334	X...11334	NA	NA	938	0.309216	0.0698407	1.06567e-05	0.00477686	0.00466741	0.306359
1-palmitoyl-2-stearoyl-GPC (16:0/18:0)	X1.palmitoyl.2.stearoyl.GPC..16.0.18.0.	Lipid	Phospholipid Metabolism	962	-0.328612	0.0742657	1.0755e-05	-0.000646049	0.00498317	0.896874
X - 17178	X...17178	NA	NA	937	-0.325639	0.073909	1.17479e-05	-0.00576299	0.00502352	0.251591
palmitate (16:0)	palmitate..16.0.	Lipid	Long Chain Fatty Acid	959	0.327497	0.074734	1.30464e-05	0.00766661	0.00500296	0.12575
sphingomyelin (d18:1/14:0, d16:1/16:0)*	sphingomyelin..d18.1.14.0..d16.1.16.0..	Lipid	Sphingolipid Metabolism	962	-0.323523	0.0743844	1.51115e-05	0.00995205	0.00498983	0.046383
4-hydroxychlorothalonil	X4.hydroxychlorothalonil	Xenobiotics	Chemical	956	-0.321909	0.0740918	1.54352e-05	-0.00904981	0.0049574	0.0682349
arachidonate (20:4n6)	arachidonate..20.4n6.	Lipid	Polyunsaturated Fatty Acid (n3 and n6)	962	-0.320918	0.074352	1.75167e-05	0.00893429	0.00498919	0.0736509
phenylalanine	phenylalanine	Amino Acid	Phenylalanine and Tyrosine Metabolism	962	0.295629	0.0685794	1.79444e-05	0.0169115	0.00461627	0.000262415
behenoyl sphingomyelin (d18:1/22:0)*	behenoyl.sphingomyelin..d18.1.22.0..	Lipid	Sphingolipid Metabolism	963	-0.313479	0.0728283	1.84591e-05	0.00869637	0.00488795	0.0755316
X - 11795	X...11795	NA	NA	956	-0.317875	0.073926	1.88392e-05	-0.00636999	0.00494169	0.197699
stearoyl sphingomyelin (d18:1/18:0)	stearoyl.sphingomyelin..d18.1.18.0.	Lipid	Sphingolipid Metabolism	959	-0.314219	0.0731715	1.93091e-05	0.0245169	0.00490375	6.82768e-07
docosadienoate (22:2n6)	docosadienoate..22.2n6.	Lipid	Polyunsaturated Fatty Acid (n3 and n6)	954	0.318478	0.0745505	2.13165e-05	0.00338597	0.00499199	0.497758
threonine	threonine	Amino Acid	Glycine, Serine and Threonine Metabolism	961	-0.313488	0.0734178	2.14941e-05	-0.00407207	0.00492763	0.408797
X - 24287	X...24287	NA	NA	941	0.310656	0.0727943	2.17591e-05	0.0245879	0.00486334	5.1511e-07
5-hydroxyindoleacetate	X5.hydroxyindoleacetate	Amino Acid	Tryptophan Metabolism	771	0.344403	0.0806308	2.18554e-05	-0.00524352	0.00533507	0.325994
bilirubin (Z,Z)	bilirubin..Z.Z.	Cofactors and Vitamins	Hemoglobin and Porphyrin Metabolism	958	-0.292812	0.0687977	2.28438e-05	-0.00772291	0.00464422	0.0966579
X - 23297	X...23297	NA	NA	918	0.323898	0.0763284	2.42431e-05	-0.00526704	0.0050671	0.298865
pyridoxate	pyridoxate	Cofactors and Vitamins	Vitamin B6 Metabolism	926	0.310937	0.0733	2.43824e-05	-0.00668546	0.00493184	0.175566
creatinine	creatinine	Amino Acid	Creatine Metabolism	950	-0.283419	0.0669965	2.55894e-05	0.00468615	0.00447613	0.295403
cysteine sulfinic acid	cysteine.sulfinic.acid	Amino Acid	Methionine, Cysteine, SAM and Taurine Metabolism	960	0.294048	0.0698525	2.79893e-05	0.0174193	0.00469092	0.000216263
X - 21626	X...21626	NA	NA	885	-0.301458	0.0719179	3.04696e-05	0.00444361	0.0048419	0.359004
1-linoleoyl-GPA (18:2)*	X1.linoleoyl.GPA..18.2..	Lipid	Lysolipid	937	0.299293	0.0714231	3.04761e-05	-0.0101651	0.00490791	0.0386162
1,2-dilinoleoyl-GPC (18:2/18:2)	X1.2.dilinoleoyl.GPC..18.2.18.2.	Lipid	Phospholipid Metabolism	963	-0.303163	0.0725315	3.18397e-05	-0.0259571	0.00486741	1.2051e-07
3-hydroxy-2-ethylpropionate	X3.hydroxy.2.ethylpropionate	Amino Acid	Leucine, Isoleucine and Valine Metabolism	958	0.298664	0.0715004	3.22207e-05	0.00854907	0.00479336	0.0748177
erucate (22:1n9)	erucate..22.1n9.	Lipid	Long Chain Fatty Acid	943	0.312854	0.0749624	3.27724e-05	-0.00294471	0.00501051	0.55687
eicosenoate (20:1)	eicosenoate..20.1.	Lipid	Long Chain Fatty Acid	962	0.309327	0.0746794	3.74447e-05	0.00461987	0.00500971	0.356664
X - 18345	X...18345	NA	NA	867	0.316602	0.077154	4.45317e-05	0.00318494	0.00509058	0.531707
isovalerylglycine	isovalerylglycine	Amino Acid	Leucine, Isoleucine and Valine Metabolism	899	0.316692	0.0772248	4.48842e-05	-0.00179309	0.00514602	0.727589
deoxycarnitine	deoxycarnitine	Lipid	Carnitine Metabolism	957	-0.283747	0.06929	4.57714e-05	-0.00161785	0.00466209	0.72865
X - 11549	X...11549	NA	NA	956	-0.295513	0.0721759	4.59166e-05	-0.0130223	0.00483695	0.00722125
3-methylglutaconate	X3.methylglutaconate	Amino Acid	Leucine, Isoleucine and Valine Metabolism	787	0.322523	0.0789014	4.80472e-05	-3.12776e-05	0.00531422	0.995305
N-acetylarginine	N.acetylarginine	Amino Acid	Urea cycle; Arginine and Proline Metabolism	951	-0.296745	0.0727628	4.91735e-05	-0.00775625	0.00490562	0.114189
arginine	arginine	Amino Acid	Urea cycle; Arginine and Proline Metabolism	962	-0.292517	0.0718281	5.03454e-05	0.00596431	0.0048169	0.215942
linolenate [alpha or gamma; (18:3n3 or 6)]	linolenate..alpha.or.gamma...18.3n3.or.6..	Lipid	Polyunsaturated Fatty Acid (n3 and n6)	963	0.298049	0.0740815	6.18949e-05	0.000140291	0.00497369	0.977503
X - 12450	X...12450	NA	NA	963	0.299927	0.0745669	6.2156e-05	0.00357583	0.00500628	0.475234
X - 21740	X...21740	NA	NA	920	-0.281688	0.0700379	6.2454e-05	-0.0104905	0.0047233	0.0265927
1-oleoyl-2-linoleoyl-glycerol (18:1/18:2)	X1.oleoyl.2.linoleoyl.glycerol..18.1.18.2.	Lipid	Diacylglycerol	964	0.291944	0.0729103	6.70212e-05	0.00585427	0.00489166	0.231685
1-lignoceroyl-GPC (24:0)	X1.lignoceroyl.GPC..24.0.	Lipid	Lysolipid	781	-0.324422	0.0809952	6.78122e-05	-0.0250161	0.00552106	6.78807e-06
1-stearoyl-2-linoleoyl-GPE (18:0/18:2)*	X1.stearoyl.2.linoleoyl.GPE..18.0.18.2..	Lipid	Phospholipid Metabolism	962	0.299796	0.074942	6.80944e-05	-0.000722	0.00502567	0.885797
valine	valine	Amino Acid	Leucine, Isoleucine and Valine Metabolism	963	0.289254	0.0724372	7.01588e-05	0.0191417	0.00485783	8.72305e-05
1-palmitoyl-GPC (16:0)	X1.palmitoyl.GPC..16.0.	Lipid	Lysolipid	962	-0.294074	0.0738086	7.27965e-05	-0.00279691	0.00494476	0.571777
methionine sulfone	methionine.sulfone	Amino Acid	Methionine, Cysteine, SAM and Taurine Metabolism	959	0.282145	0.0709529	7.51898e-05	-0.000806286	0.00481575	0.867069
stearidonate (18:4n3)	stearidonate..18.4n3.	Lipid	Polyunsaturated Fatty Acid (n3 and n6)	954	0.296226	0.0747902	8.02713e-05	-0.00223567	0.00500635	0.65529
X - 21286	X...21286	NA	NA	962	0.271693	0.0691627	9.16543e-05	-0.00184837	0.00464016	0.690467
7-alpha-hydroxy-3-oxo-4-cholestenoate (7-Hoca)	X7.alpha.hydroxy.3.oxo.4.cholestenoate..7.Hoca.	Lipid	Sterol	958	-0.287873	0.0734443	9.50039e-05	0.0191762	0.00492344	0.00010507
X - 21736	X...21736	NA	NA	947	0.278792	0.0712821	9.8433e-05	0.0155001	0.00479634	0.00127324
X - 02269	X...02269	NA	NA	962	-0.257962	0.0661783	0.000103718	-0.0044679	0.00444595	0.31518
2-oleoylglycerol (18:1)	X2.oleoylglycerol..18.1.	Lipid	Monoacylglycerol	940	0.283629	0.0734424	0.000120203	0.00379412	0.0049536	0.44391
5-methyluridine (ribothymidine)	X5.methyluridine..ribothymidine.	Nucleotide	Pyrimidine Metabolism, Uracil containing	963	-0.282614	0.0731906	0.000120296	-0.00590963	0.00493395	0.23131
acisoga	acisoga	Amino Acid	Polyamine Metabolism	933	0.280038	0.0725441	0.000121079	0.0174574	0.0048445	0.000330506
tiglylcarnitine	tiglylcarnitine	Amino Acid	Leucine, Isoleucine and Valine Metabolism	771	0.323305	0.0839272	0.000126784	-0.00616693	0.00560504	0.271568
aconitate [cis or trans]	aconitate..cis.or.trans.	Energy	TCA Cycle	947	0.277805	0.0721851	0.000126805	0.00446581	0.00481634	0.354049
isoleucine	isoleucine	Amino Acid	Leucine, Isoleucine and Valine Metabolism	961	0.279778	0.072714	0.000127127	0.0102133	0.00487463	0.0364146
X - 24438	X...24438	NA	NA	797	-0.311432	0.0812591	0.000136788	0.00520879	0.00530287	0.32627
pyruvate	pyruvate	Carbohydrate	Glycolysis, Gluconeogenesis, and Pyruvate Metabolism	956	0.276249	0.0722365	0.00013968	0.0240974	0.0048636	8.56658e-07
cortisol	cortisol	Lipid	Steroid	963	0.283594	0.0744144	0.000147181	-0.00511601	0.00498978	0.30548
2-hydroxy-3-methylvalerate	X2.hydroxy.3.methylvalerate	Amino Acid	Leucine, Isoleucine and Valine Metabolism	952	0.27446	0.0721249	0.000150647	0.0168705	0.00484099	0.000514706
X - 11470	X...11470	NA	NA	910	-0.27665	0.072757	0.000152862	-0.0165937	0.00491299	0.000762441
sphingomyelin (d18:1/21:0, d17:1/22:0, d16:1/23:0)*	sphingomyelin..d18.1.21.0..d17.1.22.0..d16.1.23.0..	Lipid	Sphingolipid Metabolism	961	-0.279294	0.0740994	0.000173767	0.00879617	0.00497907	0.0776077
arachidate (20:0)	arachidate..20.0.	Lipid	Long Chain Fatty Acid	940	0.27867	0.0740624	0.000178536	-0.0128502	0.0050076	0.0104376
1-linoleoyl-2-arachidonoyl-GPC (18:2/20:4n6)*	X1.linoleoyl.2.arachidonoyl.GPC..18.2.20.4n6..	Lipid	Phospholipid Metabolism	957	-0.283013	0.0752311	0.000178861	-0.00527265	0.00504824	0.29654
2-piperidinone	X2.piperidinone	Xenobiotics	Food Component/Plant	922	0.28826	0.0769242	0.000189848	0.00417929	0.00516404	0.418548
sphinganine-1-phosphate	sphinganine.1.phosphate	Lipid	Sphingolipid Metabolism	938	-0.274588	0.073893	0.000214357	0.00849764	0.00496547	0.0873476
asparagine	asparagine	Amino Acid	Alanine and Aspartate Metabolism	958	-0.271338	0.0731221	0.000218543	-0.0183414	0.00491438	0.000200996
1-dihomo-linoleoylglycerol (20:2)	X1.dihomo.linoleoylglycerol..20.2.	Lipid	Fatty Acid, Keto	858	0.283954	0.0764903	0.000218649	-0.00353227	0.00522197	0.498954
1-palmitoyl-GPA (16:0)	X1.palmitoyl.GPA..16.0.	Lipid	Lysolipid	937	0.264957	0.0714332	0.000220174	-0.000994551	0.00484239	0.837316
O-sulfo-L-tyrosine	O.sulfo.L.tyrosine	Xenobiotics	Chemical	944	-0.27634	0.0748301	0.000234431	0.00711846	0.00500035	0.154895
oleate/vaccenate (18:1)	oleate.vaccenate..18.1.	Lipid	Long Chain Fatty Acid	964	0.272339	0.0742504	0.000257987	0.00896816	0.00498156	0.0721305
glycosyl-N-stearoyl-sphingosine	glycosyl.N.stearoyl.sphingosine	Lipid	Sphingolipid Metabolism	956	-0.269352	0.073455	0.00025905	-0.00262715	0.00491119	0.592822
1-oleoyl-2-linoleoyl-GPE (18:1/18:2)*	X1.oleoyl.2.linoleoyl.GPE..18.1.18.2..	Lipid	Phospholipid Metabolism	934	0.278128	0.076033	0.000268409	-0.0167655	0.00507814	0.000998111
12-HETE	X12.HETE	Lipid	Eicosanoid	942	-0.253078	0.0694986	0.000285844	0.0159853	0.0046604	0.000629693
X - 23369	X...23369	NA	NA	954	0.261387	0.0721216	0.00030511	0.00255427	0.00482659	0.596785
alpha-ketoglutarate	alpha.ketoglutarate	Energy	TCA Cycle	944	0.262793	0.073098	0.000341093	0.026388	0.00494947	1.21921e-07
cholate	cholate	Lipid	Primary Bile Acid Metabolism	916	-0.274065	0.0763183	0.000346819	-0.00223729	0.00510346	0.661209
X - 12729	X...12729	NA	NA	945	-0.261739	0.0734394	0.000383498	-0.00615768	0.00489314	0.208547
pentadecanoate (15:0)	pentadecanoate..15.0.	Lipid	Long Chain Fatty Acid	954	0.265528	0.074973	0.00041688	0.00414522	0.00501622	0.408805
X - 21364	X...21364	NA	NA	950	0.259349	0.0733204	0.000423936	0.0120691	0.00494043	0.0147499
1-stearoyl-2-linoleoyl-GPC (18:0/18:2)*	X1.stearoyl.2.linoleoyl.GPC..18.0.18.2..	Lipid	Phospholipid Metabolism	963	-0.25978	0.0737952	0.000451267	-0.00493945	0.00495596	0.319176
X - 24278	X...24278	NA	NA	961	0.259313	0.0736655	0.000451556	0.0117696	0.00493302	0.0172307
X - 17340	X...17340	NA	NA	890	0.26233	0.0745478	0.000455195	0.0052656	0.00509618	0.30177
10-nonadecenoate (19:1n9)	X10.nonadecenoate..19.1n9.	Lipid	Long Chain Fatty Acid	962	0.261077	0.0746333	0.000489975	0.00832508	0.00500725	0.0967176
X - 24261	X...24261	NA	NA	960	0.259248	0.0743053	0.000506921	0.0127514	0.00500491	0.0109962
N-acetylisoleucine	N.acetylisoleucine	Amino Acid	Leucine, Isoleucine and Valine Metabolism	960	0.254038	0.073083	0.000531684	0.00678126	0.00489658	0.166406
alpha-hydroxyisovalerate	alpha.hydroxyisovalerate	Amino Acid	Leucine, Isoleucine and Valine Metabolism	959	0.250688	0.0721993	0.000539311	0.022922	0.00485307	2.66818e-06
N-acetylhistidine	N.acetylhistidine	Amino Acid	Histidine Metabolism	930	-0.254513	0.073585	0.00056728	-0.0179863	0.00497887	0.000319461
X - 11787	X...11787	NA	NA	930	0.245322	0.0709816	0.000572767	0.00522179	0.00480157	0.277089
acetylcarnitine	acetylcarnitine	Lipid	Fatty Acid Metabolism(Acyl Carnitine)	956	0.254301	0.0737066	0.000584703	0.00485793	0.00495982	0.327601
beta-hydroxyisovalerate	beta.hydroxyisovalerate	Amino Acid	Leucine, Isoleucine and Valine Metabolism	958	0.247384	0.0717863	0.000593387	-0.000990622	0.00480533	0.836717
gamma-glutamylphenylalanine	gamma.glutamylphenylalanine	Peptide	Gamma-glutamyl Amino Acid	958	0.232482	0.0676768	0.000617551	0.0141696	0.00452881	0.00180852
N-acetylleucine	N.acetylleucine	Amino Acid	Leucine, Isoleucine and Valine Metabolism	956	0.246296	0.0721836	0.000671733	0.012839	0.00485147	0.00826878
10-heptadecenoate (17:1n7)	X10.heptadecenoate..17.1n7.	Lipid	Long Chain Fatty Acid	963	0.250848	0.0738727	0.000712544	0.0143316	0.00495967	0.00394364
glucuronate	glucuronate	Carbohydrate	Aminosugar Metabolism	940	0.238664	0.0703281	0.00071869	0.00568119	0.00470097	0.227153
2-hydroxypalmitate	X2.hydroxypalmitate	Lipid	Fatty Acid, Monohydroxy	956	-0.251684	0.0745092	0.000759916	-0.00154749	0.00500208	0.757107
2-hydroxyhippurate (salicylurate)	X2.hydroxyhippurate..salicylurate.	Xenobiotics	Benzoate Metabolism	923	0.240975	0.0714196	0.000771487	0.00246837	0.0047732	0.605188
tyramine O-sulfate	tyramine.O.sulfate	Amino Acid	Phenylalanine and Tyrosine Metabolism	807	0.276461	0.0821277	0.000798048	0.00243985	0.00550661	0.65783
dihomo-linolenate (20:3n3 or n6)	dihomo.linolenate..20.3n3.or.n6.	Lipid	Polyunsaturated Fatty Acid (n3 and n6)	960	-0.250005	0.074582	0.000833379	0.0118573	0.0049959	0.0178207
indolepropionate	indolepropionate	Amino Acid	Tryptophan Metabolism	933	-0.247438	0.0749667	0.00100124	-0.0144803	0.00507306	0.00440799
N6-succinyladenosine	N6.succinyladenosine	Nucleotide	Purine Metabolism, Adenine containing	939	0.23456	0.0718239	0.0011312	-0.000420987	0.0048217	0.930443
X - 24748	X...24748	NA	NA	947	0.233825	0.0716203	0.00113475	-0.00440945	0.00489506	0.367925
stearate (18:0)	stearate..18.0.	Lipid	Long Chain Fatty Acid	953	0.244335	0.0748594	0.00113794	0.000512961	0.00501163	0.918497
sphingosine 1-phosphate	sphingosine.1.phosphate	Lipid	Sphingolipid Metabolism	963	-0.238649	0.0734041	0.00118919	0.00751999	0.00492486	0.127103
bilirubin (E,E)*	bilirubin..E.E..	Cofactors and Vitamins	Hemoglobin and Porphyrin Metabolism	956	-0.237499	0.0736068	0.00129533	-0.00475744	0.00494203	0.335967
taurocholenate sulfate	taurocholenate.sulfate	Lipid	Secondary Bile Acid Metabolism	956	-0.233284	0.0723739	0.00131003	-0.0059174	0.00488508	0.226072
1-oleoyl-2-linoleoyl-GPC (18:1/18:2)*	X1.oleoyl.2.linoleoyl.GPC..18.1.18.2..	Lipid	Phospholipid Metabolism	960	-0.23366	0.0734157	0.00150603	-0.0299347	0.00493498	1.88616e-09
N-acetylthreonine	N.acetylthreonine	Amino Acid	Glycine, Serine and Threonine Metabolism	940	-0.233211	0.0732847	0.00150926	0.0117317	0.00490451	0.0169512
6-oxopiperidine-2-carboxylic acid	X6.oxopiperidine.2.carboxylic.acid	Amino Acid	Lysine Metabolism	946	0.227156	0.0721522	0.00169372	0.00349495	0.00484563	0.47093
X - 23765	X...23765	NA	NA	948	-0.219944	0.0701704	0.00177486	-0.0189495	0.00476459	7.50553e-05
X - 17189	X...17189	NA	NA	947	-0.234221	0.0751997	0.00189703	-0.00542006	0.00504924	0.283347
1-linoleoyl-2-linolenoyl-GPC (18:2/18:3)*	X1.linoleoyl.2.linolenoyl.GPC..18.2.18.3..	Lipid	Phospholipid Metabolism	947	-0.225504	0.0731819	0.00211973	-0.0252131	0.00492582	3.7282e-07
alanine	alanine	Amino Acid	Alanine and Aspartate Metabolism	959	0.226213	0.0738402	0.00224844	0.0106334	0.00497465	0.0328075
N-acetylglutamate	N.acetylglutamate	Amino Acid	Glutamate Metabolism	954	0.225038	0.0734591	0.00224943	0.0109313	0.00491575	0.0264003
X - 14658	X...14658	NA	NA	819	-0.248394	0.0810938	0.00226266	-0.00464866	0.00544061	0.393113
glycoursodeoxycholate	glycoursodeoxycholate	Lipid	Secondary Bile Acid Metabolism	957	-0.225554	0.0739239	0.00234245	0.00395777	0.00500583	0.429354
pregnenolone sulfate	pregnenolone.sulfate	Lipid	Steroid	931	-0.205438	0.067498	0.00240317	-0.00862766	0.00456667	0.0591666
X - 17351	X...17351	NA	NA	789	0.239137	0.0785654	0.00241369	-0.00842905	0.00547303	0.123935
linoleate (18:2n6)	linoleate..18.2n6.	Lipid	Polyunsaturated Fatty Acid (n3 and n6)	964	0.226262	0.0743917	0.00241779	0.0018072	0.00499105	0.717366
proline	proline	Amino Acid	Urea cycle; Arginine and Proline Metabolism	960	0.224785	0.0739423	0.00242991	0.00237658	0.00496227	0.632097
X - 17469	X...17469	NA	NA	838	0.231547	0.0762539	0.00246736	0.00912467	0.00522883	0.0813392
X - 14056	X...14056	NA	NA	959	-0.220112	0.0725162	0.0024674	0.0138553	0.00488424	0.00465383
taurocholate	taurocholate	Lipid	Primary Bile Acid Metabolism	908	-0.230335	0.0766947	0.00274422	0.00442786	0.00519111	0.393901
X - 21792	X...21792	NA	NA	906	-0.231928	0.0772774	0.00276252	0.0067784	0.0051353	0.187181
X - 12686	X...12686	NA	NA	862	-0.231106	0.0770098	0.00276852	0.00527018	0.00517246	0.30854
1-oleoyl-3-linoleoyl-glycerol (18:1/18:2)	X1.oleoyl.3.linoleoyl.glycerol..18.1.18.2.	Lipid	Diacylglycerol	964	0.219987	0.0733655	0.00278272	0.00721116	0.0049222	0.143239
N1-methyladenosine	N1.methyladenosine	Nucleotide	Purine Metabolism, Adenine containing	950	-0.222575	0.0743252	0.00281918	0.00550188	0.00500402	0.271833
orotate	orotate	Nucleotide	Pyrimidine Metabolism, Orotate containing	940	-0.221404	0.0740391	0.00285914	-0.00630442	0.00505956	0.21306
1-(1-enyl-stearoyl)-2-oleoyl-GPE (P-18:0/18:1)	X1..1.enyl.stearoyl..2.oleoyl.GPE..P.18.0.18.1.	Lipid	Plasmalogen	953	0.221464	0.0744621	0.00301174	-0.00617779	0.00502448	0.219173
3-ureidopropionate	X3.ureidopropionate	Nucleotide	Pyrimidine Metabolism, Uracil containing	945	0.217268	0.0731196	0.00303943	-0.00585345	0.0049496	0.237261
caffeic acid sulfate	caffeic.acid.sulfate	Xenobiotics	Xanthine Metabolism	881	0.224453	0.0758778	0.00317833	-0.00138151	0.00511074	0.786982
tryptophan betaine	tryptophan.betaine.	Amino Acid	Tryptophan Metabolism	954	-0.20338	0.0691274	0.00333871	0.00318302	0.00465963	0.494706
2-aminoheptanoate	X2.aminoheptanoate	Lipid	Fatty Acid, Amino	949	0.217693	0.0740988	0.0033846	0.00629749	0.00496308	0.2048
pantothenate	pantothenate	Cofactors and Vitamins	Pantothenate and CoA Metabolism	946	0.207579	0.0711832	0.00362771	0.0119239	0.0047958	0.0130783
X - 23782	X...23782	NA	NA	935	0.210978	0.0724824	0.00369126	-0.00160881	0.00483517	0.739413
4-imidazoleacetate	X4.imidazoleacetate	Amino Acid	Histidine Metabolism	795	0.236988	0.0814385	0.00371485	-0.0120398	0.00546316	0.0278233
X - 14568	X...14568	NA	NA	964	-0.218401	0.0752694	0.00379716	-0.00173888	0.00504993	0.730668
X - 23749	X...23749	NA	NA	955	-0.201048	0.069922	0.00412595	-0.0213439	0.00471028	6.60342e-06
1-myristoylglycerol (14:0)	X1.myristoylglycerol..14.0.	Lipid	Monoacylglycerol	942	0.211515	0.0739691	0.00433673	0.00757134	0.00495495	0.126839
hexadecanedioate	hexadecanedioate	Lipid	Fatty Acid, Dicarboxylate	954	0.21015	0.0738467	0.00452542	-0.00285496	0.00497519	0.566211
dihomo-linoleate (20:2n6)	dihomo.linoleate..20.2n6.	Lipid	Polyunsaturated Fatty Acid (n3 and n6)	959	0.211787	0.0746794	0.00466498	0.00385173	0.00502561	0.443614
1-linolenoylglycerol (18:3)	X1.linolenoylglycerol..18.3.	Lipid	Monoacylglycerol	910	0.213436	0.075872	0.00501219	-0.000394056	0.00516715	0.939228
2-aminobutyrate	X2.aminobutyrate	Amino Acid	Methionine, Cysteine, SAM and Taurine Metabolism	959	0.208476	0.0742915	0.00511463	0.0026225	0.00497607	0.5983
X - 23314	X...23314	NA	NA	865	-0.216753	0.0773436	0.00518471	0.00149378	0.00529308	0.777848
1-methylhistidine	X1.methylhistidine	Amino Acid	Histidine Metabolism	948	-0.197309	0.0710166	0.00557154	0.0093275	0.0047708	0.0508619
2-hydroxydecanoate	X2.hydroxydecanoate	Lipid	Fatty Acid, Monohydroxy	953	-0.200001	0.0721332	0.00566846	-0.0145486	0.00484878	0.00276575
X - 11441	X...11441	NA	NA	954	-0.196265	0.0710836	0.00587223	-0.00231819	0.00475469	0.625974
uridine	uridine	Nucleotide	Pyrimidine Metabolism, Uracil containing	963	-0.202125	0.0733828	0.00599105	5.59733e-06	0.00492284	0.999093
X - 16654	X...16654	NA	NA	814	0.21862	0.0797979	0.00628472	0.0114799	0.00541066	0.0341629
N-acetylcitrulline	N.acetylcitrulline	Amino Acid	Urea cycle; Arginine and Proline Metabolism	928	-0.20218	0.0739054	0.00634444	0.0118119	0.00494485	0.0171059
1-linoleoylglycerol (18:2)	X1.linoleoylglycerol..18.2.	Lipid	Monoacylglycerol	951	0.199754	0.0731967	0.00646994	-0.00437173	0.00488148	0.370707
5-hydroxyhexanoate	X5.hydroxyhexanoate	Lipid	Fatty Acid, Monohydroxy	807	0.203113	0.0744024	0.00647295	-0.0101929	0.00500276	0.0419299
4-androsten-3beta,17beta-diol disulfate (1)	X4.androsten.3beta.17beta.diol.disulfate..1.	Lipid	Steroid	960	0.194687	0.0715642	0.00663713	0.0246861	0.00479044	3.10841e-07
succinylcarnitine	succinylcarnitine	Energy	TCA Cycle	893	0.193891	0.0713262	0.00668752	0.013739	0.00485375	0.00475042
X - 12007	X...12007	NA	NA	862	0.207018	0.0765348	0.00696769	-0.0125276	0.00515655	0.015325
homocitrulline	homocitrulline	Amino Acid	Urea cycle; Arginine and Proline Metabolism	937	0.197121	0.0730631	0.00710192	-0.0013899	0.00487672	0.775701
2-aminoadipate	X2.aminoadipate	Amino Acid	Lysine Metabolism	937	0.185491	0.0688812	0.00720961	0.0209301	0.0046719	8.38589e-06
pregn steroid monosulfate*	pregn.steroid.monosulfate.	Lipid	Steroid	964	-0.178682	0.0664992	0.00733426	-0.00565371	0.00446153	0.205385
1-palmitoleoylglycerol (16:1)*	X1.palmitoleoylglycerol..16.1..	Lipid	Monoacylglycerol	950	0.194807	0.0726368	0.00744687	0.0210121	0.0048733	1.78926e-05
dimethylglycine	dimethylglycine	Amino Acid	Glycine, Serine and Threonine Metabolism	956	-0.192731	0.0718681	0.00745052	0.00562403	0.00485571	0.24706
ornithine	ornithine	Amino Acid	Urea cycle; Arginine and Proline Metabolism	954	-0.188661	0.070509	0.007585	-0.00052793	0.00476086	0.911727
X - 23637	X...23637	NA	NA	956	0.185226	0.0692637	0.00761826	-0.0104982	0.00464807	0.0241322
4-allylphenol sulfate	X4.allylphenol.sulfate	Xenobiotics	Food Component/Plant	959	0.186844	0.0699345	0.00767477	-0.00390272	0.00471792	0.408322
X - 21343	X...21343	NA	NA	964	0.200187	0.0749504	0.00769166	-0.000679231	0.00502853	0.89258
gamma-carboxyglutamate	gamma.carboxyglutamate	Amino Acid	Glutamate Metabolism	831	0.208627	0.0784931	0.00801405	0.0116357	0.00537705	0.0307514
etiocholanolone glucuronide	etiocholanolone.glucuronide	Lipid	Steroid	906	0.199441	0.0750777	0.00803528	-0.022441	0.00512333	1.32446e-05
X - 22764	X...22764	NA	NA	961	0.199214	0.0750089	0.00804136	0.00228955	0.00503037	0.649107
dimethylarginine (SDMA + ADMA)	dimethylarginine..SDMA...ADMA.	Amino Acid	Urea cycle; Arginine and Proline Metabolism	951	-0.196345	0.0745962	0.00862326	0.0074857	0.0050163	0.135959
N-acetylvaline	N.acetylvaline	Amino Acid	Leucine, Isoleucine and Valine Metabolism	952	0.189772	0.0723613	0.00886642	0.011441	0.00483129	0.0180788
docosapentaenoate (n6 DPA; 22:5n6)	docosapentaenoate..n6.DPA..22.5n6.	Lipid	Polyunsaturated Fatty Acid (n3 and n6)	961	-0.194467	0.0751304	0.00978822	0.00270188	0.00504231	0.592192
X - 18249	X...18249	NA	NA	956	-0.191521	0.0740593	0.00985529	0.00977148	0.00496946	0.0495521
X - 24054	X...24054	NA	NA	960	-0.189068	0.0731477	0.00989186	-0.0209931	0.00489778	2.00043e-05
3-methyl-2-oxovalerate	X3.methyl.2.oxovalerate	Amino Acid	Leucine, Isoleucine and Valine Metabolism	962	0.191469	0.0741092	0.0099237	0.0124264	0.00496771	0.0125348
X - 24472	X...24472	NA	NA	946	-0.182251	0.0706761	0.010068	0.00469694	0.00472958	0.320915
2-methylcitrate/homocitrate	X2.methylcitrate.homocitrate	Energy	TCA Cycle	846	-0.199631	0.0774521	0.0101208	0.00575011	0.00518062	0.267346
N-methylpipecolate	N.methylpipecolate	Xenobiotics	Chemical	829	0.203551	0.0789731	0.0101244	0.00107671	0.00518627	0.835586
N-acetylalanine	N.acetylalanine	Amino Acid	Alanine and Aspartate Metabolism	944	-0.189513	0.0736288	0.0102075	0.0136796	0.0049218	0.00555416
N6,N6,N6-trimethyllysine	N6.N6.N6.trimethyllysine	Amino Acid	Lysine Metabolism	952	-0.178418	0.0693958	0.010291	0.00749291	0.00464227	0.106845
tartarate	tartarate	Xenobiotics	Food Component/Plant	897	-0.192909	0.0755866	0.0108704	-0.00492928	0.00504849	0.329135
stearoylcarnitine	stearoylcarnitine	Lipid	Fatty Acid Metabolism(Acyl Carnitine)	955	-0.184873	0.0725356	0.0109676	-0.00363482	0.00487542	0.456129
trigonelline (N'-methylnicotinate)	trigonelline..N..methylnicotinate.	Cofactors and Vitamins	Nicotinate and Nicotinamide Metabolism	963	0.175017	0.0692093	0.011604	0.000753301	0.00464136	0.871102
X - 17299	X...17299	NA	NA	945	-0.179624	0.0712183	0.0118269	0.0119533	0.00476615	0.0123098
propionylcarnitine	propionylcarnitine	Lipid	Fatty Acid Metabolism (also BCAA Metabolism)	951	0.181609	0.0726971	0.0126519	0.0111488	0.00487387	0.0223879
X - 18779	X...18779	NA	NA	957	-0.172013	0.0688942	0.0127001	0.0130925	0.00461521	0.00465272
X - 24513	X...24513	NA	NA	943	-0.177807	0.0712287	0.0127199	0.0291878	0.00482085	2.03136e-09
X - 21470	X...21470	NA	NA	924	0.190385	0.076317	0.0127816	0.0180529	0.0051663	0.000497757
quinolinate	quinolinate	Cofactors and Vitamins	Nicotinate and Nicotinamide Metabolism	942	-0.186878	0.0749392	0.0128114	0.0160098	0.00501816	0.0014679
linoleoylcarnitine*	linoleoylcarnitine.	Lipid	Fatty Acid Metabolism(Acyl Carnitine)	958	-0.17918	0.072081	0.0130953	0.00164838	0.00485503	0.734293
octadecanedioate	octadecanedioate	Lipid	Fatty Acid, Dicarboxylate	949	0.186468	0.0750867	0.0131864	-0.00362444	0.00505058	0.473162
N2,N5-diacetylornithine	N2.N5.diacetylornithine	Amino Acid	Urea cycle; Arginine and Proline Metabolism	855	0.177939	0.0717365	0.0133129	-0.0042354	0.00481175	0.378988
X - 13866	X...13866	NA	NA	954	0.166784	0.0673046	0.0133823	0.00280579	0.00452988	0.535803
glycochenodeoxycholate sulfate	glycochenodeoxycholate.sulfate	Lipid	Primary Bile Acid Metabolism	951	-0.182845	0.0740016	0.0136546	0.00947451	0.00498481	0.0576467
X - 12127	X...12127	NA	NA	813	-0.19396	0.0788624	0.0141211	0.00217697	0.00534956	0.684157
13-HODE + 9-HODE	X13.HODE...9.HODE	Lipid	Fatty Acid, Monohydroxy	960	0.181633	0.0741369	0.0144646	-0.00120485	0.00497148	0.808559
methionine sulfoxide	methionine.sulfoxide	Amino Acid	Methionine, Cysteine, SAM and Taurine Metabolism	958	0.171772	0.070652	0.0152298	-0.00338557	0.00474354	0.475572
X - 17653	X...17653	NA	NA	946	0.183544	0.0756635	0.0154612	-0.0166794	0.00507648	0.00105497
gamma-glutamylhistidine	gamma.glutamylhistidine	Peptide	Gamma-glutamyl Amino Acid	956	0.173309	0.0716793	0.015799	-0.0173564	0.00481057	0.000324605
kynurenine	kynurenine	Amino Acid	Tryptophan Metabolism	960	-0.179575	0.0743729	0.0159422	0.0164114	0.00498247	0.00102444
oleoyl ethanolamide	oleoyl.ethanolamide	Lipid	Endocannabinoid	957	0.178796	0.0743457	0.0163647	0.0111093	0.00497846	0.025881
X - 21796	X...21796	NA	NA	942	0.129985	0.0542727	0.0168137	0.00226818	0.00364293	0.533681
histidine	histidine	Amino Acid	Histidine Metabolism	962	-0.173255	0.0723663	0.0168504	-0.013023	0.00485474	0.00743213
X - 12170	X...12170	NA	NA	870	0.175326	0.0739854	0.0180182	0.0112749	0.00494589	0.0228699
adrenate (22:4n6)	adrenate..22.4n6.	Lipid	Polyunsaturated Fatty Acid (n3 and n6)	950	0.179494	0.075837	0.0181404	0.0136343	0.00508444	0.00745491
2,3-dihydroxyisovalerate	X2.3.dihydroxyisovalerate	Xenobiotics	Food Component/Plant	932	0.173156	0.0737497	0.0190887	0.0014759	0.00492961	0.764705
cysteine	cysteine	Amino Acid	Methionine, Cysteine, SAM and Taurine Metabolism	957	-0.174997	0.074622	0.0192247	-0.00121054	0.00501987	0.809492
X - 13431	X...13431	NA	NA	957	-0.166737	0.0715274	0.0199556	0.00551084	0.00478131	0.249371
laurate (12:0)	laurate..12.0.	Lipid	Medium Chain Fatty Acid	949	0.175839	0.0755223	0.0201053	0.000975294	0.00507711	0.847708
gamma-glutamylalanine	gamma.glutamylalanine	Peptide	Gamma-glutamyl Amino Acid	955	0.157665	0.0680383	0.0206983	-0.000249938	0.00460706	0.956747
1-palmitoyl-GPE (16:0)	X1.palmitoyl.GPE..16.0.	Lipid	Lysolipid	962	0.170452	0.0738375	0.0211838	-0.00832755	0.00495497	0.0931561
caproate (6:0)	caproate..6.0.	Lipid	Medium Chain Fatty Acid	939	0.170455	0.074255	0.0219221	-0.00124518	0.00497044	0.802242
isocitrate	isocitrate	Energy	TCA Cycle	939	0.168559	0.0734899	0.0220314	0.000164602	0.00492535	0.973347
15-methylpalmitate	X15.methylpalmitate	Lipid	Fatty Acid, Branched	956	0.172846	0.0754843	0.0222487	0.00473477	0.00505801	0.349461
imidazole lactate	imidazole.lactate	Amino Acid	Histidine Metabolism	954	-0.166149	0.0727177	0.0225404	0.00790016	0.00487155	0.105199
X - 12748	X...12748	NA	NA	949	0.16142	0.0707407	0.0227182	0.0124162	0.00478587	0.00962301
docosadioate	docosadioate	Lipid	Fatty Acid, Dicarboxylate	945	0.169494	0.074809	0.0236957	-0.0100257	0.00497377	0.0441131
X - 13729	X...13729	NA	NA	769	0.18405	0.0819964	0.0250767	0.00189193	0.00560961	0.736008
salicylate	salicylate	Xenobiotics	Drug	929	0.16514	0.0736094	0.0251018	-0.000806013	0.00491105	0.869671
alpha-hydroxyisocaproate	alpha.hydroxyisocaproate	Amino Acid	Leucine, Isoleucine and Valine Metabolism	956	0.156337	0.0698045	0.0253431	0.0168818	0.00470179	0.000346828
9-hydroxystearate	X9.hydroxystearate	Lipid	Fatty Acid, Monohydroxy	879	-0.173645	0.0777844	0.0258407	0.0138459	0.00517002	0.00754216
tryptophan	tryptophan	Amino Acid	Tryptophan Metabolism	963	-0.163389	0.0736565	0.0267697	0.0119035	0.0049396	0.0161477
glycolithocholate sulfate*	glycolithocholate.sulfate.	Lipid	Secondary Bile Acid Metabolism	960	-0.164484	0.0743116	0.0271015	-5.87597e-05	0.0049995	0.990625
palmitoyl ethanolamide	palmitoyl.ethanolamide	Lipid	Endocannabinoid	952	0.162393	0.0735436	0.0274737	0.01422	0.00493222	0.00402662
citrate	citrate	Energy	TCA Cycle	961	0.162399	0.0735556	0.0274913	-0.00515266	0.00493534	0.296732
2-hydroxystearate	X2.hydroxystearate	Lipid	Fatty Acid, Monohydroxy	958	-0.162261	0.0747314	0.0301566	-0.000205011	0.00501598	0.967407
X - 11442	X...11442	NA	NA	962	-0.153382	0.0709198	0.0308062	0.00022661	0.00475513	0.962
1-methylxanthine	X1.methylxanthine	Xenobiotics	Xanthine Metabolism	947	-0.156312	0.0729365	0.0323578	-0.00561167	0.00491173	0.253533
O-methylcatechol sulfate	O.methylcatechol.sulfate	Xenobiotics	Benzoate Metabolism	951	0.150016	0.070025	0.0324213	0.00368595	0.00467478	0.430615
X - 21448	X...21448	NA	NA	947	-0.153693	0.0721043	0.0333021	-0.00541706	0.00485321	0.264628
X - 16935	X...16935	NA	NA	937	0.159994	0.0752728	0.0338037	-0.00664572	0.00502466	0.186284
serine	serine	Amino Acid	Glycine, Serine and Threonine Metabolism	958	0.149829	0.0705722	0.0340046	-0.00447494	0.00475916	0.347311
5alpha-pregnan-3beta,20beta-diol monosulfate (1)	X5alpha.pregnan.3beta.20beta.diol.monosulfate..1.	Lipid	Steroid	878	-0.160915	0.0758262	0.0341043	-0.015263	0.00512044	0.00295435
cystine	cystine	Amino Acid	Methionine, Cysteine, SAM and Taurine Metabolism	952	0.143261	0.0676934	0.0345762	0.0169993	0.00453918	0.000191212
4-methyl-2-oxopentanoate	X4.methyl.2.oxopentanoate	Amino Acid	Leucine, Isoleucine and Valine Metabolism	960	0.156512	0.0741281	0.0349987	0.0117426	0.00496971	0.0183348
2-stearoyl-GPE (18:0)*	X2.stearoyl.GPE..18.0..	Lipid	Lysolipid	951	0.157499	0.0746844	0.0352174	-0.0055615	0.0050484	0.270899
gamma-CEHC	gamma.CEHC	Cofactors and Vitamins	Tocopherol Metabolism	957	-0.154948	0.0737053	0.0357911	-0.0120105	0.00494446	0.0153204
paraxanthine	paraxanthine	Xenobiotics	Xanthine Metabolism	944	-0.15304	0.0730154	0.0363489	0.0010661	0.00495074	0.829548
trans-urocanate	trans.urocanate	Amino Acid	Histidine Metabolism	957	-0.1585	0.0756253	0.0363563	0.00184788	0.00509265	0.716795
3-(4-hydroxyphenyl)lactate	X3..4.hydroxyphenyl.lactate	Amino Acid	Phenylalanine and Tyrosine Metabolism	960	-0.147772	0.0705924	0.0365837	0.0281831	0.00475313	4.23839e-09
16-hydroxypalmitate	X16.hydroxypalmitate	Lipid	Fatty Acid, Monohydroxy	958	0.156678	0.0748544	0.0366021	0.00179169	0.00504073	0.722336
palmitoleate (16:1n7)	palmitoleate..16.1n7.	Lipid	Long Chain Fatty Acid	962	0.153057	0.0733366	0.0371468	0.0205989	0.00493606	3.27623e-05
X - 24024	X...24024	NA	NA	884	0.160359	0.0769529	0.0374599	0.0191116	0.0051494	0.000218993
gamma-glutamyl-epsilon-lysine	gamma.glutamyl.epsilon.lysine	Peptide	Gamma-glutamyl Amino Acid	956	0.14392	0.0690816	0.0374858	0.00427731	0.00463366	0.356191
2-pyrrolidinone	X2.pyrrolidinone	Xenobiotics	Chemical	954	0.134671	0.0647954	0.0379388	0.00743737	0.00434579	0.0873329
X - 24125	X...24125	NA	NA	892	0.157138	0.0758132	0.0384865	0.0233916	0.00509449	5.03122e-06
tetradecanedioate	tetradecanedioate	Lipid	Fatty Acid, Dicarboxylate	953	0.154619	0.0746373	0.0385708	-0.0121393	0.00503931	0.0161886
glycocholate	glycocholate	Lipid	Primary Bile Acid Metabolism	951	-0.153274	0.0740231	0.038663	-6.57956e-05	0.00504689	0.989601
17-methylstearate	X17.methylstearate	Lipid	Fatty Acid, Branched	954	0.153239	0.0740919	0.0388873	0.00831455	0.00496628	0.0944193
X - 22775	X...22775	NA	NA	939	0.156662	0.0758248	0.0390924	-0.00788569	0.00508162	0.121045
1-oleoyl-GPE (18:1)	X1.oleoyl.GPE..18.1.	Lipid	Lysolipid	963	0.152438	0.0739118	0.039434	-0.0187531	0.00496124	0.00016652
taurolithocholate 3-sulfate	taurolithocholate.3.sulfate	Lipid	Secondary Bile Acid Metabolism	919	-0.15662	0.0761264	0.0399327	-0.00651051	0.00518854	0.209876
1-(1-enyl-palmitoyl)-2-oleoyl-GPE (P-16:0/18:1)*	X1..1.enyl.palmitoyl..2.oleoyl.GPE..P.16.0.18.1..	Lipid	Plasmalogen	938	0.156706	0.0762973	0.0402636	-0.00629224	0.00508949	0.216649
galactonate	galactonate	Carbohydrate	Fructose, Mannose and Galactose Metabolism	837	0.158064	0.0779349	0.0428603	-0.00727687	0.00531004	0.17093
1-palmitoyl-2-oleoyl-GPI (16:0/18:1)*	X1.palmitoyl.2.oleoyl.GPI..16.0.18.1..	Lipid	Phospholipid Metabolism	955	0.148778	0.0734136	0.0429837	0.0156971	0.00490649	0.00142321
N-acetylasparagine	N.acetylasparagine	Amino Acid	Alanine and Aspartate Metabolism	957	-0.152935	0.0755433	0.0431988	-0.0115827	0.00506816	0.0225077
X - 17367	X...17367	NA	NA	810	0.160574	0.079327	0.043277	-0.000785898	0.00531447	0.882475
oleoylcarnitine	oleoylcarnitine	Lipid	Fatty Acid Metabolism(Acyl Carnitine)	956	-0.147263	0.072848	0.0435055	0.0124512	0.00490225	0.0112458
1-(1-enyl-palmitoyl)-2-arachidonoyl-GPE (P-16:0/20:4)*	X1..1.enyl.palmitoyl..2.arachidonoyl.GPE..P.16.0.20.4..	Lipid	Plasmalogen	963	-0.150009	0.074322	0.0438302	0.00629787	0.00498126	0.206424
1-stearoyl-2-arachidonoyl-GPI (18:0/20:4)	X1.stearoyl.2.arachidonoyl.GPI..18.0.20.4.	Lipid	Phospholipid Metabolism	963	0.150038	0.0744431	0.044133	0.0170872	0.00499507	0.000650556
taurochenodeoxycholate	taurochenodeoxycholate	Lipid	Primary Bile Acid Metabolism	950	-0.149298	0.0747766	0.0461548	-0.00227048	0.00507873	0.654936
octanoylcarnitine	octanoylcarnitine	Lipid	Fatty Acid Metabolism(Acyl Carnitine)	960	0.149223	0.0751525	0.0473613	0.0084551	0.00503442	0.0933883
X - 17328	X...17328	NA	NA	800	0.160028	0.0807633	0.047883	-6.1069e-05	0.00552293	0.99118
X - 17325	X...17325	NA	NA	906	0.149233	0.075692	0.048961	-0.00275296	0.00505319	0.586028
X - 24549	X...24549	NA	NA	804	-0.153311	0.0779824	0.049646	-0.00910372	0.00523855	0.0826235
phenylacetylglutamine	phenylacetylglutamine	Amino Acid	Phenylalanine and Tyrosine Metabolism	956	0.139366	0.0709908	0.0499178	-0.00404274	0.00473872	0.393801
N6-acetyllysine	N6.acetyllysine	Amino Acid	Lysine Metabolism	959	-0.144905	0.073815	0.0499251	0.00718031	0.00496628	0.148556
5-methylthioadenosine (MTA)	X5.methylthioadenosine..MTA.	Amino Acid	Polyamine Metabolism	862	-0.152413	0.0776574	0.0500095	0.0141238	0.00522793	0.00703614
3-phenylpropionate (hydrocinnamate)	X3.phenylpropionate..hydrocinnamate.	Amino Acid	Phenylalanine and Tyrosine Metabolism	927	-0.145641	0.0742647	0.0501659	-0.0124672	0.00502769	0.013326
5alpha-androstan-3beta,17alpha-diol disulfate	X5alpha.androstan.3beta.17alpha.diol.disulfate	Lipid	Steroid	775	0.153657	0.0784855	0.0506148	-0.0269512	0.00546036	9.77695e-07
X - 18914	X...18914	NA	NA	951	-0.146639	0.0751057	0.0511796	0.00691142	0.00503368	0.170065
decanoylcarnitine	decanoylcarnitine	Lipid	Fatty Acid Metabolism(Acyl Carnitine)	963	0.146495	0.0752927	0.0519851	0.00646178	0.00504654	0.200699
phosphate	phosphate	Energy	Oxidative Phosphorylation	957	-0.145676	0.0751023	0.0527098	-0.00637715	0.00505691	0.207589
X - 11540	X...11540	NA	NA	923	-0.149195	0.0773038	0.0539152	0.0199594	0.00509698	9.66874e-05
X - 09789	X...09789	NA	NA	962	0.138438	0.0720712	0.0550455	-0.00510029	0.0048456	0.292806
1-palmitoleoyl-2-oleoyl-glycerol (16:1/18:1)*	X1.palmitoleoyl.2.oleoyl.glycerol..16.1.18.1..	Lipid	Diacylglycerol	882	0.142249	0.0742504	0.055713	0.0271942	0.0049511	5.18323e-08
X - 21658	X...21658	NA	NA	915	-0.127027	0.0663495	0.0558654	0.0101091	0.00440582	0.0219882
1-palmitoyl-2-linolenoyl-GPC (16:0/18:3)*	X1.palmitoyl.2.linolenoyl.GPC..16.0.18.3..	Lipid	Phospholipid Metabolism	797	-0.156839	0.0823691	0.0572573	-0.00890509	0.00537802	0.0981498
X - 23756	X...23756	NA	NA	842	0.147912	0.0779678	0.0581571	-0.0037931	0.00514967	0.461588
5alpha-androstan-3beta,17beta-diol disulfate	X5alpha.androstan.3beta.17beta.diol.disulfate	Lipid	Steroid	955	0.124763	0.065848	0.0584333	0.00884518	0.00446445	0.0478502
X - 23639	X...23639	NA	NA	961	-0.137035	0.0725904	0.059356	-0.0229031	0.00486723	2.90288e-06
X - 16576	X...16576	NA	NA	834	-0.150239	0.0796928	0.0597471	-0.0153675	0.0052749	0.00367148
gamma-glutamylmethionine	gamma.glutamylmethionine	Peptide	Gamma-glutamyl Amino Acid	956	-0.134082	0.0711673	0.0598635	-0.00478921	0.00478055	0.316688
1-linoleoyl-GPE (18:2)*	X1.linoleoyl.GPE..18.2..	Lipid	Lysolipid	963	-0.137378	0.073383	0.0614993	-0.023326	0.00492056	2.45325e-06
palmitoleoylcarnitine*	palmitoleoylcarnitine.	Lipid	Fatty Acid Metabolism(Acyl Carnitine)	963	-0.138444	0.0739631	0.0615367	0.0216374	0.00496275	1.44089e-05
N1-Methyl-2-pyridone-5-carboxamide	N1.Methyl.2.pyridone.5.carboxamide	Cofactors and Vitamins	Nicotinate and Nicotinamide Metabolism	952	-0.138183	0.0739873	0.0621172	0.0171195	0.00495643	0.000576713
2-aminooctanoate	X2.aminooctanoate	Lipid	Fatty Acid, Amino	948	0.130852	0.0701623	0.0624915	-0.0166713	0.00471967	0.000431817
X - 24204	X...24204	NA	NA	950	-0.137822	0.0740263	0.06294	0.0188796	0.00497774	0.000158371
X - 21607	X...21607	NA	NA	872	-0.141039	0.0764177	0.0652838	-0.0115659	0.00511549	0.0240077
glycocholenate sulfate*	glycocholenate.sulfate.	Lipid	Secondary Bile Acid Metabolism	959	-0.135279	0.0735329	0.0661195	-0.00161667	0.00492755	0.742917
2-palmitoyl-GPC (16:0)*	X2.palmitoyl.GPC..16.0..	Lipid	Lysolipid	956	-0.137357	0.0747131	0.0663054	-0.00652879	0.00500918	0.192764
heptanoate (7:0)	heptanoate..7.0.	Lipid	Medium Chain Fatty Acid	942	0.123274	0.0672151	0.066966	-0.0113312	0.00451464	0.012244
gamma-tocopherol/beta-tocopherol	gamma.tocopherol.beta.tocopherol	Cofactors and Vitamins	Tocopherol Metabolism	932	0.134745	0.0736544	0.0676563	0.0134503	0.00495039	0.00670941
theophylline	theophylline	Xenobiotics	Xanthine Metabolism	948	-0.132168	0.0726751	0.0692855	0.00626606	0.00491417	0.202586
gamma-glutamylglycine	gamma.glutamylglycine	Peptide	Gamma-glutamyl Amino Acid	960	0.122582	0.0678616	0.0711771	-0.00895534	0.00455244	0.0494532
betaine	betaine	Amino Acid	Glycine, Serine and Threonine Metabolism	957	-0.131979	0.0736475	0.0734425	-0.00816216	0.00494236	0.0989702
X - 21733	X...21733	NA	NA	929	-0.126956	0.0713564	0.0755375	-0.0102893	0.00478809	0.0318972
malonate	malonate	Lipid	Fatty Acid Synthesis	945	0.13379	0.0754462	0.0764986	-0.00247632	0.00505561	0.624377
N-formylmethionine	N.formylmethionine	Amino Acid	Methionine, Cysteine, SAM and Taurine Metabolism	947	-0.13112	0.0741259	0.0772353	0.00712279	0.00495024	0.150516
quinate	quinate	Xenobiotics	Food Component/Plant	947	0.12913	0.0731329	0.0777711	-0.00043911	0.00495913	0.929462
N-acetylphenylalanine	N.acetylphenylalanine	Amino Acid	Phenylalanine and Tyrosine Metabolism	946	-0.127841	0.0727937	0.079376	0.0173577	0.004855	0.000367633
isovalerylcarnitine	isovalerylcarnitine	Amino Acid	Leucine, Isoleucine and Valine Metabolism	962	0.124994	0.0713487	0.0801141	0.024937	0.00478424	2.28251e-07
1-(1-enyl-palmitoyl)-2-linoleoyl-GPE (P-16:0/18:2)*	X1..1.enyl.palmitoyl..2.linoleoyl.GPE..P.16.0.18.2..	Lipid	Plasmalogen	964	-0.130343	0.0745659	0.0807785	-0.0103963	0.00500274	0.0379624
X - 14096	X...14096	NA	NA	959	0.125185	0.0717504	0.0813529	0.0193608	0.00483863	6.78468e-05
docosapentaenoate (n3 DPA; 22:5n3)	docosapentaenoate..n3.DPA..22.5n3.	Lipid	Polyunsaturated Fatty Acid (n3 and n6)	960	0.130398	0.0747896	0.0815609	0.00277634	0.00501968	0.580331
1-palmitoyl-2-arachidonoyl-GPC (16:0/20:4)	X1.palmitoyl.2.arachidonoyl.GPC..16.0.20.4.	Lipid	Phospholipid Metabolism	962	0.129823	0.0747339	0.0826827	0.0148468	0.00500805	0.00310566
cystathionine	cystathionine	Amino Acid	Methionine, Cysteine, SAM and Taurine Metabolism	902	-0.129716	0.0751894	0.0848361	0.00606081	0.00507431	0.232631
X - 07765	X...07765	NA	NA	960	-0.126477	0.0736455	0.0862332	0.00487958	0.00494732	0.324231
N-acetyl-beta-alanine	N.acetyl.beta.alanine	Nucleotide	Pyrimidine Metabolism, Uracil containing	961	0.105857	0.0617666	0.0868841	0.0110471	0.00414579	0.00783596
indole-3-carboxylic acid	indole.3.carboxylic.acid	Amino Acid	Tryptophan Metabolism	927	-0.13108	0.0767159	0.0878526	0.00175216	0.00510922	0.731721
X - 24295	X...24295	NA	NA	848	0.133472	0.0791327	0.0920319	0.0196258	0.00536113	0.000267035
1,2,3-benzenetriol sulfate (2)	X1.2.3.benzenetriol.sulfate..2.	Xenobiotics	Chemical	791	0.139215	0.0825714	0.0921903	0.00218246	0.00562559	0.698156
X - 18921	X...18921	NA	NA	924	-0.123027	0.0732521	0.0933911	-0.00893276	0.00492294	0.0699225
1-palmitoyl-2-oleoyl-GPC (16:0/18:1)	X1.palmitoyl.2.oleoyl.GPC..16.0.18.1.	Lipid	Phospholipid Metabolism	960	0.126858	0.0755504	0.0934555	0.00562813	0.00505233	0.265572
1-methylimidazoleacetate	X1.methylimidazoleacetate	Amino Acid	Histidine Metabolism	931	0.123172	0.0743604	0.0979732	-0.00126797	0.00496756	0.798586
5alpha-androstan-3alpha,17beta-diol monosulfate (1)	X5alpha.androstan.3alpha.17beta.diol.monosulfate..1.	Lipid	Steroid	900	0.121978	0.0739163	0.0992475	-0.00484132	0.00503712	0.336745
X - 21319	X...21319	NA	NA	924	0.122057	0.0740708	0.0997258	-0.000941554	0.00493151	0.848625
N-delta-acetylornithine	N.delta.acetylornithine	Amino Acid	Urea cycle; Arginine and Proline Metabolism	960	0.114734	0.0700629	0.101836	-0.00787989	0.0046941	0.0935396
X - 24738	X...24738	NA	NA	838	0.127355	0.0778899	0.102411	-0.00092129	0.00526936	0.861248
caffeine	caffeine	Xenobiotics	Xanthine Metabolism	954	-0.119259	0.0729896	0.102606	0.00397959	0.00491996	0.418794
X - 16946	X...16946	NA	NA	954	-0.118271	0.073209	0.106527	-0.00413911	0.00491221	0.399654
N-acetylcarnosine	N.acetylcarnosine	Peptide	Dipeptide Derivative	937	-0.0991847	0.0621394	0.110789	0.00968476	0.00418473	0.0208662
1,3-dimethylurate	X1.3.dimethylurate	Xenobiotics	Xanthine Metabolism	928	-0.118138	0.0741838	0.111613	0.00874381	0.00501072	0.0813122
cortisone	cortisone	Lipid	Steroid	952	0.120202	0.0755284	0.111834	-0.00906811	0.00504559	0.0726152
N-acetylneuraminate	N.acetylneuraminate	Carbohydrate	Aminosugar Metabolism	946	0.11541	0.0727238	0.112857	0.00498755	0.00485915	0.304953
glycochenodeoxycholate glucuronide (1)	glycochenodeoxycholate.glucuronide..1.	Lipid	Primary Bile Acid Metabolism	956	0.114272	0.0726387	0.116013	0.00100038	0.00488617	0.837822
lanthionine	lanthionine	Xenobiotics	Chemical	789	0.12849	0.0819322	0.117225	0.00278533	0.00552988	0.614623
X - 11538	X...11538	NA	NA	953	0.116128	0.0741103	0.117455	-0.00973072	0.00498191	0.0510868
4-androsten-3beta,17beta-diol disulfate (2)	X4.androsten.3beta.17beta.diol.disulfate..2.	Lipid	Steroid	962	0.111821	0.0717833	0.119621	0.0126576	0.00484672	0.00915292
X - 17690	X...17690	NA	NA	926	-0.119033	0.0766566	0.120811	0.00537079	0.00519169	0.301174
X - 12104	X...12104	NA	NA	947	-0.10852	0.0705982	0.124591	0.0189918	0.00472816	6.36803e-05
X - 15728	X...15728	NA	NA	881	-0.116627	0.0760073	0.125287	-0.00931248	0.00508401	0.0673309
4-acetamidobutanoate	X4.acetamidobutanoate	Amino Acid	Polyamine Metabolism	932	0.108719	0.0711933	0.127077	0.000852955	0.00476303	0.857915
X - 16480	X...16480	NA	NA	942	-0.114333	0.0749205	0.127332	-0.0174401	0.00500567	0.000516604
4-vinylphenol sulfate	X4.vinylphenol.sulfate	Xenobiotics	Benzoate Metabolism	956	0.107201	0.070306	0.127645	-0.00421753	0.00471003	0.37078
X - 12844	X...12844	NA	NA	950	0.112114	0.0736678	0.12837	-0.00740503	0.00493362	0.133706
nonadecanoate (19:0)	nonadecanoate..19.0.	Lipid	Long Chain Fatty Acid	949	0.114294	0.0751489	0.128618	-0.0140188	0.00501435	0.00528276
indoleacetate	indoleacetate	Amino Acid	Tryptophan Metabolism	944	0.113582	0.0751848	0.131198	-0.0068203	0.00506395	0.178357
1-stearoyl-2-arachidonoyl-GPC (18:0/20:4)	X1.stearoyl.2.arachidonoyl.GPC..18.0.20.4.	Lipid	Phospholipid Metabolism	963	-0.111915	0.0743328	0.132501	0.0158887	0.00498811	0.00149242
N6-carbamoylthreonyladenosine	N6.carbamoylthreonyladenosine	Nucleotide	Purine Metabolism, Adenine containing	941	-0.109992	0.0734829	0.134772	0.0210632	0.00494256	2.23396e-05
ribitol	ribitol	Carbohydrate	Pentose Metabolism	916	0.111065	0.0745915	0.136837	0.0180509	0.00498469	0.000309258
N1-methylinosine	N1.methylinosine	Nucleotide	Purine Metabolism, (Hypo)Xanthine/Inosine containing	932	0.108655	0.0732067	0.138086	0.0137106	0.00490623	0.00530429
X - 24439	X...24439	NA	NA	924	0.112059	0.0766563	0.144127	0.00587214	0.00515041	0.254528
X - 11308	X...11308	NA	NA	961	0.108705	0.0746787	0.14582	-0.00754148	0.00502479	0.133722
5-oxoproline	X5.oxoproline	Amino Acid	Glutathione Metabolism	946	0.0983976	0.0676661	0.146233	-0.00819102	0.00457033	0.0734179
eicosanodioate	eicosanodioate	Lipid	Fatty Acid, Dicarboxylate	954	-0.105364	0.0725305	0.14664	-0.0108614	0.00485868	0.0256181
X - 12216	X...12216	NA	NA	855	0.111265	0.0766548	0.147006	-0.0193318	0.00529192	0.000274884
xanthurenate	xanthurenate	Amino Acid	Tryptophan Metabolism	778	-0.119202	0.0821504	0.147176	-0.00370775	0.00552219	0.502147
X - 18899	X...18899	NA	NA	953	0.0995125	0.0693327	0.151533	-0.0184514	0.00469784	9.19695e-05
trimethylamine N-oxide	trimethylamine.N.oxide	Lipid	Phospholipid Metabolism	951	0.100203	0.069911	0.152104	0.00738883	0.00468987	0.115477
catechol sulfate	catechol.sulfate	Xenobiotics	Benzoate Metabolism	958	0.102082	0.0715105	0.15376	-0.00352285	0.00480515	0.463652
X - 13658	X...13658	NA	NA	962	0.100562	0.0707503	0.155536	0.00299731	0.00473117	0.526543
retinal	retinal	Xenobiotics	Food Component/Plant	917	0.103251	0.0728686	0.156838	-0.00259445	0.00488915	0.595787
2-hydroxyglutarate	X2.hydroxyglutarate	Lipid	Fatty Acid, Dicarboxylate	943	-0.0826024	0.0584229	0.15773	-0.00543374	0.00396322	0.170688
5alpha-pregnan-3beta,20alpha-diol monosulfate (2)	X5alpha.pregnan.3beta.20alpha.diol.monosulfate..2.	Lipid	Steroid	894	-0.105623	0.0755708	0.162559	-0.0172063	0.00514561	0.000860516
ursodeoxycholate	ursodeoxycholate	Lipid	Secondary Bile Acid Metabolism	817	0.113817	0.081444	0.162647	0.0031001	0.00543851	0.568816
X - 24240	X...24240	NA	NA	958	0.0994369	0.0712798	0.163333	0.00604837	0.00477757	0.205824
X - 11478	X...11478	NA	NA	925	0.10183	0.0733821	0.16557	-0.00354209	0.00486887	0.467106
tricosanoyl sphingomyelin (d18:1/23:0)*	tricosanoyl.sphingomyelin..d18.1.23.0..	Lipid	Sphingolipid Metabolism	958	-0.104793	0.0757047	0.166609	0.00612759	0.00506709	0.226849
spermidine	spermidine	Amino Acid	Polyamine Metabolism	898	-0.100418	0.072666	0.167341	0.00270142	0.00486442	0.578799
X - 12063	X...12063	NA	NA	955	-0.101408	0.0737284	0.16932	0.0326152	0.00503377	1.47389e-10
hexanoylcarnitine	hexanoylcarnitine	Lipid	Fatty Acid Metabolism(Acyl Carnitine)	954	0.10179	0.0741758	0.170298	0.0149492	0.00499238	0.00282069
androsterone sulfate	androsterone.sulfate	Lipid	Steroid	961	-0.0966812	0.0704752	0.170431	-0.0077026	0.00476901	0.106609
X - 24309	X...24309	NA	NA	951	-0.102692	0.0751797	0.172275	0.00513727	0.00512772	0.316664
X - 12212	X...12212	NA	NA	958	0.0998971	0.0735796	0.174887	-0.00270333	0.00493841	0.584226
N-(2-furoyl)glycine	N..2.furoyl.glycine	Xenobiotics	Food Component/Plant	907	0.103113	0.0761351	0.175965	-0.00309707	0.0050341	0.538565
3-methylhistidine	X3.methylhistidine	Amino Acid	Histidine Metabolism	964	-0.0986086	0.0742445	0.18444	0.00486651	0.00498117	0.328824
3-methyl-2-oxobutyrate	X3.methyl.2.oxobutyrate	Amino Acid	Leucine, Isoleucine and Valine Metabolism	943	0.0993811	0.0756822	0.189456	0.0235836	0.00504151	3.32181e-06
glycochenodeoxycholate	glycochenodeoxycholate	Lipid	Primary Bile Acid Metabolism	958	-0.0968821	0.0745389	0.193999	-0.00131722	0.00504699	0.794155
tyrosine	tyrosine	Amino Acid	Phenylalanine and Tyrosine Metabolism	961	-0.094497	0.072933	0.1954	0.0253403	0.00489398	2.73352e-07
4-ethylphenylsulfate	X4.ethylphenylsulfate	Xenobiotics	Benzoate Metabolism	958	-0.0942082	0.0732276	0.198575	-0.00742252	0.00491045	0.130971
laurylcarnitine	laurylcarnitine	Lipid	Fatty Acid Metabolism(Acyl Carnitine)	964	0.0964514	0.0753542	0.200862	0.00514678	0.00505562	0.308919
9,10-DiHOME	X9.10.DiHOME	Lipid	Fatty Acid, Dihydroxy	866	0.0998696	0.0782445	0.202164	-0.0123993	0.00531394	0.0198579
4-guanidinobutanoate	X4.guanidinobutanoate	Amino Acid	Guanidino and Acetamido Metabolism	955	0.089761	0.0712962	0.208343	-0.00718643	0.00476663	0.131974
4-androsten-3beta,17beta-diol monosulfate (1)	X4.androsten.3beta.17beta.diol.monosulfate..1.	Lipid	Steroid	956	0.0881259	0.070208	0.209709	0.0104481	0.00473344	0.0275299
4-hydroxyphenylpyruvate	X4.hydroxyphenylpyruvate	Amino Acid	Phenylalanine and Tyrosine Metabolism	956	-0.0919555	0.0747245	0.218778	0.0129201	0.00500857	0.0100398
andro steroid monosulfate (1)*	andro.steroid.monosulfate..1..	Lipid	Steroid	894	0.0949027	0.0771441	0.218946	0.010677	0.00527022	0.0430712
N-palmitoyl-sphingosine (d18:1/16:0)	N.palmitoyl.sphingosine..d18.1.16.0.	Lipid	Sphingolipid Metabolism	961	-0.0922895	0.0752015	0.220037	-0.000234942	0.00504781	0.962887
1-arachidonoyl-GPA (20:4)	X1.arachidonoyl.GPA..20.4.	Lipid	Lysolipid	961	0.0878534	0.0719129	0.222134	0.0107964	0.0048927	0.0275761
S-1-pyrroline-5-carboxylate	S.1.pyrroline.5.carboxylate	Amino Acid	Glutamate Metabolism	924	-0.0928801	0.0763756	0.224259	0.00130139	0.00520092	0.802471
X - 24452	X...24452	NA	NA	943	-0.0861477	0.0711178	0.226069	0.00624723	0.00474596	0.188384
X - 11372	X...11372	NA	NA	933	-0.0853552	0.0704838	0.226205	0.000426324	0.00473434	0.928267
X - 23293	X...23293	NA	NA	957	0.0914494	0.0755654	0.226501	0.00558817	0.00507305	0.270938
12,13-DiHOME	X12.13.DiHOME	Lipid	Fatty Acid, Dihydroxy	860	0.094782	0.0787288	0.228958	-0.00707966	0.00536146	0.187029
4-cholesten-3-one	X4.cholesten.3.one	Lipid	Sterol	945	0.0894447	0.0743746	0.229424	0.0214547	0.00502166	2.12919e-05
N-acetylserine	N.acetylserine	Amino Acid	Glycine, Serine and Threonine Metabolism	944	-0.0908716	0.0758919	0.231458	-0.00172269	0.00509529	0.735367
docosahexaenoate (DHA; 22:6n3)	docosahexaenoate..DHA..22.6n3.	Lipid	Polyunsaturated Fatty Acid (n3 and n6)	962	-0.0846958	0.0708382	0.232138	0.00248445	0.00475287	0.601284
X - 21666	X...21666	NA	NA	949	0.0895508	0.0752105	0.234082	0.0129688	0.00507277	0.0107264
dehydroisoandrosterone sulfate (DHEA-S)	dehydroisoandrosterone.sulfate..DHEA.S.	Lipid	Steroid	964	-0.082826	0.0696022	0.234343	0.00243988	0.00466971	0.601448
allantoin	allantoin	Nucleotide	Purine Metabolism, (Hypo)Xanthine/Inosine containing	958	-0.0822006	0.0691784	0.235033	0.0153724	0.00465121	0.000984898
1-stearoyl-2-oleoyl-GPC (18:0/18:1)	X1.stearoyl.2.oleoyl.GPC..18.0.18.1.	Lipid	Phospholipid Metabolism	961	-0.0889397	0.0749353	0.235566	0.00502818	0.00501587	0.316377
X - 24588	X...24588	NA	NA	952	-0.0847912	0.0715938	0.236575	0.01793	0.00479065	0.000192949
methyl-4-hydroxybenzoate sulfate	methyl.4.hydroxybenzoate.sulfate	Xenobiotics	Benzoate Metabolism	933	-0.0890999	0.0752979	0.236993	-0.00047925	0.00504981	0.924411
2-aminophenol sulfate	X2.aminophenol.sulfate	Xenobiotics	Chemical	958	0.0868875	0.0734408	0.237065	-0.00422028	0.00492134	0.391357
X - 16964	X...16964	NA	NA	920	0.069685	0.0597043	0.243445	0.00180545	0.00397173	0.649523
N-palmitoyl glycine	N.palmitoyl.glycine	Lipid	Fatty Acid Metabolism(Acyl Glycine)	950	0.0877586	0.0752913	0.244074	0.00592988	0.00503772	0.239452
sarcosine (N-Methylglycine)	sarcosine..N.Methylglycine.	Amino Acid	Glycine, Serine and Threonine Metabolism	904	0.0874517	0.0757874	0.248843	-0.000806522	0.00507246	0.873704
X - 11805	X...11805	NA	NA	939	-0.0860676	0.0753153	0.253428	0.0112063	0.00505877	0.0269833
1-palmitoleoyl-3-oleoyl-glycerol (16:1/18:1)*	X1.palmitoleoyl.3.oleoyl.glycerol..16.1.18.1..	Lipid	Diacylglycerol	912	0.0856501	0.0750846	0.254288	0.0251974	0.00501171	5.97496e-07
caprylate (8:0)	caprylate..8.0.	Lipid	Medium Chain Fatty Acid	953	-0.0855835	0.0756599	0.258272	-0.00492724	0.00514199	0.338187
X - 24699	X...24699	NA	NA	921	-0.0806963	0.0713705	0.258489	0.00560156	0.00483431	0.246874
2-methylbutyrylcarnitine (C5)	X2.methylbutyrylcarnitine..C5.	Amino Acid	Leucine, Isoleucine and Valine Metabolism	946	0.081696	0.0723331	0.258998	0.0168484	0.00483894	0.000520775
piperine	piperine	Xenobiotics	Food Component/Plant	957	-0.0826632	0.0734246	0.260522	0.0113068	0.00496731	0.0230512
X - 21258	X...21258	NA	NA	955	-0.0802489	0.0715252	0.262158	-0.00881756	0.00481087	0.0671377
2-isopropylmalate	X2.isopropylmalate	Xenobiotics	Food Component/Plant	891	0.0860153	0.0768844	0.263543	0.00332542	0.00512946	0.516959
cytidine	cytidine	Nucleotide	Pyrimidine Metabolism, Cytidine containing	876	-0.0883046	0.0792508	0.265481	0.00640492	0.00521069	0.219331
3,7-dimethylurate	X3.7.dimethylurate	Xenobiotics	Xanthine Metabolism	808	-0.0917298	0.0824824	0.26642	0.00502721	0.00556839	0.366895
eicosapentaenoate (EPA; 20:5n3)	eicosapentaenoate..EPA..20.5n3.	Lipid	Polyunsaturated Fatty Acid (n3 and n6)	954	0.0798352	0.0718646	0.266887	0.00342432	0.00481566	0.477208
methionine	methionine	Amino Acid	Methionine, Cysteine, SAM and Taurine Metabolism	958	-0.0809809	0.0730724	0.268042	0.00639237	0.00490439	0.192752
hydantoin-5-propionic acid	hydantoin.5.propionic.acid	Amino Acid	Histidine Metabolism	894	0.084209	0.0761362	0.26901	0.0234502	0.00502944	3.59867e-06
X - 11880	X...11880	NA	NA	962	-0.0783409	0.0716123	0.274247	0.004757	0.00480793	0.322712
heme	heme	Cofactors and Vitamins	Hemoglobin and Porphyrin Metabolism	936	0.0585845	0.0540939	0.279081	0.0100757	0.00363312	0.00565954
X - 17357	X...17357	NA	NA	928	0.0786829	0.072905	0.280756	-0.00236109	0.00486533	0.627585
tricosenoate (23:1)	tricosenoate..23.1.	Lipid	Long Chain Fatty Acid	932	0.0800319	0.074674	0.28411	-0.0165655	0.00511653	0.00124778
phenyllactate (PLA)	phenyllactate..PLA.	Amino Acid	Phenylalanine and Tyrosine Metabolism	945	-0.0782702	0.0731274	0.284745	0.0127005	0.0048812	0.00941521
6-hydroxyindole sulfate	X6.hydroxyindole.sulfate	Xenobiotics	Chemical	947	0.0772214	0.0728054	0.289117	-0.00947491	0.00487312	0.0521525
hippurate	hippurate	Xenobiotics	Benzoate Metabolism	956	0.0748157	0.0707026	0.290243	-0.00806573	0.00471948	0.08777
X - 12688	X...12688	NA	NA	942	-0.0788742	0.0747711	0.291753	-0.000486416	0.00502678	0.922934
4-androsten-3beta,17beta-diol monosulfate (2)	X4.androsten.3beta.17beta.diol.monosulfate..2.	Lipid	Steroid	926	0.0799051	0.0757754	0.29193	0.0104632	0.00513797	0.0419906
X - 23680	X...23680	NA	NA	846	-0.0806793	0.0768067	0.293825	0.00409769	0.00512217	0.42394
X - 12472	X...12472	NA	NA	899	0.0804925	0.0772972	0.297999	0.0102342	0.00513627	0.0466138
gamma-glutamyl-2-aminobutyrate	gamma.glutamyl.2.aminobutyrate	Peptide	Gamma-glutamyl Amino Acid	956	0.0743169	0.0714583	0.298601	8.63237e-05	0.00478154	0.9856
X - 17337	X...17337	NA	NA	957	-0.0746676	0.0721546	0.301011	0.00986888	0.00484121	0.041773
X - 21834	X...21834	NA	NA	885	-0.0786578	0.076671	0.305212	0.00150162	0.00520033	0.772836
C-glycosyltryptophan	C.glycosyltryptophan	Amino Acid	Tryptophan Metabolism	937	-0.0756319	0.0737293	0.305248	0.0204487	0.00499521	4.61224e-05
X - 11261	X...11261	NA	NA	961	0.0711431	0.0695697	0.306747	0.005927	0.0046714	0.204825
4-methylcatechol sulfate	X4.methylcatechol.sulfate	Xenobiotics	Benzoate Metabolism	963	-0.075505	0.0738589	0.306902	-0.00822856	0.00495798	0.0973087
2-hydroxyphenylacetate	X2.hydroxyphenylacetate	Amino Acid	Phenylalanine and Tyrosine Metabolism	877	0.07722	0.0756594	0.307713	0.000980409	0.00499684	0.844495
X - 15503	X...15503	NA	NA	937	0.0736877	0.0722374	0.307955	0.0188739	0.0048202	9.67213e-05
X - 12847	X...12847	NA	NA	940	-0.0765622	0.0750597	0.307982	0.00542725	0.00512627	0.290003
cis-4-decenoyl carnitine	cis.4.decenoyl.carnitine	Lipid	Fatty Acid Metabolism(Acyl Carnitine)	960	0.0753796	0.0741545	0.309637	0.00415784	0.00496996	0.403029
phytanate	phytanate	Xenobiotics	Food Component/Plant	960	0.0756516	0.0751085	0.314078	-0.00968261	0.00504188	0.0550989
X - 12459	X...12459	NA	NA	913	0.0773781	0.0771448	0.316115	0.0064259	0.00516466	0.213743
cysteine s-sulfate	cysteine.s.sulfate	Amino Acid	Methionine, Cysteine, SAM and Taurine Metabolism	946	-0.0676448	0.0682342	0.321762	0.0105132	0.00458934	0.0221944
dodecanedioate	dodecanedioate	Lipid	Fatty Acid, Dicarboxylate	939	0.0712619	0.0729452	0.328858	-0.0210017	0.00494146	2.35004e-05
ferulic acid 4-sulfate	ferulic.acid.4.sulfate	Xenobiotics	Food Component/Plant	882	-0.0737791	0.0761055	0.332596	0.000659961	0.00514529	0.897968
X - 11378	X...11378	NA	NA	920	0.0734977	0.0758489	0.332799	0.000239839	0.00514307	0.962815
X - 12306	X...12306	NA	NA	789	-0.0776665	0.0807935	0.336698	-0.00768886	0.0058278	0.187437
orotidine	orotidine	Nucleotide	Pyrimidine Metabolism, Orotate containing	930	0.0695051	0.0726281	0.338816	0.0122393	0.00496017	0.0137846
lysine	lysine	Amino Acid	Lysine Metabolism	957	-0.0698193	0.0730631	0.339514	0.0174636	0.00491857	0.000403136
N-acetylputrescine	N.acetylputrescine	Amino Acid	Polyamine Metabolism	945	0.0716448	0.0750795	0.3402	0.00429091	0.00508475	0.398951
X - 18913	X...18913	NA	NA	960	0.0694986	0.0728512	0.340334	-0.0111532	0.00488399	0.0226118
hypoxanthine	hypoxanthine	Nucleotide	Purine Metabolism, (Hypo)Xanthine/Inosine containing	946	-0.0659566	0.069169	0.340551	0.00126036	0.00466489	0.787081
X - 01911	X...01911	NA	NA	879	0.0725303	0.076158	0.341173	0.0136818	0.00517178	0.00830325
caprate (10:0)	caprate..10.0.	Lipid	Medium Chain Fatty Acid	955	0.0716604	0.0755857	0.343335	-0.00654563	0.00509417	0.19913
2-hydroxyoctanoate	X2.hydroxyoctanoate	Lipid	Fatty Acid, Monohydroxy	945	-0.0674761	0.0712069	0.343572	-0.00858109	0.00477867	0.0728602
2-methylserine	X2.methylserine	Amino Acid	Glycine, Serine and Threonine Metabolism	907	0.0734222	0.077801	0.345565	-0.00487419	0.00517817	0.346803
10-undecenoate (11:1n1)	X10.undecenoate..11.1n1.	Lipid	Medium Chain Fatty Acid	963	-0.0693603	0.0737122	0.34696	1.66029e-05	0.00494323	0.997321
benzoate	benzoate	Xenobiotics	Benzoate Metabolism	957	0.060547	0.0644082	0.347428	0.00292634	0.00434648	0.50094
X - 15245	X...15245	NA	NA	859	0.072258	0.0769614	0.348053	0.0318799	0.00522977	1.6428e-09
biliverdin	biliverdin	Cofactors and Vitamins	Hemoglobin and Porphyrin Metabolism	948	-0.0578378	0.0617035	0.348817	-0.00298835	0.00416379	0.473119
myo-inositol	myo.inositol	Lipid	Inositol Metabolism	942	-0.0680125	0.0725583	0.348819	0.00451192	0.00486181	0.353629
3-methoxycatechol sulfate (2)	X3.methoxycatechol.sulfate..2.	Xenobiotics	Benzoate Metabolism	934	0.0702734	0.0752062	0.350334	0.00670838	0.00503128	0.182747
X - 14626	X...14626	NA	NA	775	-0.0780336	0.083896	0.352597	-0.00868662	0.00565996	0.125254
sulfate*	sulfate.	Xenobiotics	Chemical	946	-0.0685689	0.0742744	0.356147	0.00585507	0.00498177	0.240171
arabitol/xylitol	arabitol.xylitol	Carbohydrate	Pentose Metabolism	952	0.0663372	0.0719663	0.356876	0.00652317	0.0048186	0.176139
X - 17654	X...17654	NA	NA	956	0.0684522	0.074987	0.36155	-0.0125852	0.00504097	0.012707
fumarate	fumarate	Energy	TCA Cycle	954	-0.0677316	0.0744861	0.363412	0.00421776	0.00500161	0.399283
X - 12100	X...12100	NA	NA	944	-0.0639544	0.071444	0.370926	0.0177638	0.00478166	0.000215146
2-linoleoylglycerol (18:2)	X2.linoleoylglycerol..18.2.	Lipid	Monoacylglycerol	927	-0.0666304	0.0744765	0.371206	-0.00296669	0.00507728	0.559156
X - 11843	X...11843	NA	NA	792	-0.0727698	0.0814856	0.372108	-0.0114756	0.00539945	0.0338681
X - 24241	X...24241	NA	NA	936	-0.0646783	0.0728426	0.374813	-0.00541869	0.00492451	0.271462
nicotinamide	nicotinamide	Cofactors and Vitamins	Nicotinate and Nicotinamide Metabolism	945	0.0548943	0.0620342	0.376433	-0.00659694	0.00418182	0.115009
X - 12339	X...12339	NA	NA	947	0.0643654	0.0730946	0.378771	0.0107197	0.00487089	0.0279926
indolelactate	indolelactate	Amino Acid	Tryptophan Metabolism	955	0.0625111	0.071566	0.382624	0.00785243	0.00480002	0.102187
myristoleate (14:1n5)	myristoleate..14.1n5.	Lipid	Long Chain Fatty Acid	964	0.0638306	0.073612	0.386091	0.0162347	0.00493873	0.00104836
azelate (nonanedioate)	azelate..nonanedioate.	Lipid	Fatty Acid, Dicarboxylate	883	0.0410027	0.047516	0.388413	-0.0104785	0.00320857	0.00113369
X - 12442	X...12442	NA	NA	964	0.0647248	0.0752846	0.390149	0.0038838	0.00505095	0.442127
1-methylurate	X1.methylurate	Xenobiotics	Xanthine Metabolism	838	0.0674148	0.0792281	0.395071	0.00409278	0.00521091	0.432427
X - 23295	X...23295	NA	NA	963	-0.0620433	0.0740502	0.40232	-0.00536399	0.00496965	0.280703
X - 24544	X...24544	NA	NA	918	-0.0593582	0.0723668	0.412292	-0.00549412	0.0048847	0.260984
X - 11849	X...11849	NA	NA	956	-0.0594669	0.0730971	0.416115	0.0217726	0.0049232	1.08784e-05
X - 24097	X...24097	NA	NA	954	-0.0593937	0.0730099	0.416133	0.0100841	0.00488378	0.039211
1-palmitoyl-2-linoleoyl-GPC (16:0/18:2)	X1.palmitoyl.2.linoleoyl.GPC..16.0.18.2.	Lipid	Phospholipid Metabolism	962	-0.0597163	0.0745715	0.42345	-0.00628889	0.00499717	0.20852
X - 16938	X...16938	NA	NA	964	-0.0599645	0.0749999	0.424182	0.00111687	0.00503185	0.824392
X - 21358	X...21358	NA	NA	961	-0.0543528	0.0681016	0.425001	0.00308738	0.00456719	0.49921
X - 19438	X...19438	NA	NA	815	0.06519	0.0821224	0.427534	0.0153742	0.00552474	0.0055139
butyrylcarnitine	butyrylcarnitine	Lipid	Fatty Acid Metabolism (also BCAA Metabolism)	944	0.0585657	0.0742572	0.430493	0.023414	0.00493347	2.39647e-06
X - 19141	X...19141	NA	NA	939	0.05865	0.0748595	0.433551	-0.00602709	0.00502043	0.230243
X - 16071	X...16071	NA	NA	959	-0.0562781	0.0724578	0.437526	0.00431864	0.00486256	0.374687
X - 21661	X...21661	NA	NA	841	-0.0614626	0.0791753	0.437799	0.00831102	0.00543917	0.12689
urea	urea	Amino Acid	Urea cycle; Arginine and Proline Metabolism	946	-0.0548895	0.0711576	0.440675	0.00669415	0.00477605	0.16136
kynurenate	kynurenate	Amino Acid	Tryptophan Metabolism	947	-0.0565264	0.073361	0.441181	0.0158686	0.00489934	0.00124156
5-hydroxylysine	X5.hydroxylysine	Amino Acid	Lysine Metabolism	919	-0.0577105	0.0752649	0.443418	0.0263955	0.00503317	1.94741e-07
retinol (Vitamin A)	retinol..Vitamin.A.	Cofactors and Vitamins	Vitamin A Metabolism	954	0.0541585	0.0708368	0.444727	-0.0010949	0.00474532	0.817573
xanthine	xanthine	Nucleotide	Purine Metabolism, (Hypo)Xanthine/Inosine containing	959	0.0542264	0.0712408	0.446742	0.0112917	0.00479841	0.0188132
7-methylxanthine	X7.methylxanthine	Xenobiotics	Xanthine Metabolism	931	-0.0567257	0.0762895	0.457331	0.00312466	0.00518517	0.546911
N-palmitoyl-sphinganine (d18:0/16:0)	N.palmitoyl.sphinganine..d18.0.16.0.	Lipid	Sphingolipid Metabolism	954	-0.055944	0.0753007	0.4577	0.00649598	0.00502993	0.196855
taurodeoxycholate	taurodeoxycholate	Lipid	Secondary Bile Acid Metabolism	821	-0.0593792	0.0808474	0.462878	-0.0120121	0.00558015	0.0316375
serotonin	serotonin	Amino Acid	Tryptophan Metabolism	956	-0.0551958	0.0757341	0.466296	-0.00986922	0.00507565	0.0521372
X - 14939	X...14939	NA	NA	958	0.0518475	0.071774	0.470242	-0.00148392	0.00481101	0.757812
thyroxine	thyroxine	Amino Acid	Phenylalanine and Tyrosine Metabolism	961	0.0526262	0.0732133	0.472435	0.00854132	0.00494757	0.0846031
1-methylnicotinamide	X1.methylnicotinamide	Cofactors and Vitamins	Nicotinate and Nicotinamide Metabolism	934	-0.0536871	0.076357	0.482165	-0.0021634	0.00515723	0.674955
X - 22162	X...22162	NA	NA	950	-0.0505494	0.0719407	0.482443	0.00580457	0.00483001	0.229752
alpha-tocopherol	alpha.tocopherol	Cofactors and Vitamins	Tocopherol Metabolism	961	-0.0512785	0.0735287	0.485724	-0.00187506	0.00494451	0.704608
X - 24041	X...24041	NA	NA	907	-0.050691	0.0728989	0.487008	7.61723e-05	0.00488286	0.987557
pregnen-diol disulfate*	pregnen.diol.disulfate.	Lipid	Steroid	964	-0.0475281	0.0684489	0.487625	0.00281169	0.00459233	0.540512
X - 11858	X...11858	NA	NA	923	-0.0509672	0.0740889	0.491676	0.0143024	0.00501234	0.00442149
succinate	succinate	Energy	TCA Cycle	956	-0.0497267	0.0724126	0.49243	0.0148118	0.00487997	0.0024686
propionylglycine	propionylglycine	Lipid	Fatty Acid Metabolism (also BCAA Metabolism)	952	0.0502391	0.0736228	0.495162	-0.024003	0.00498212	1.68802e-06
X - 17145	X...17145	NA	NA	906	0.0478614	0.0707982	0.499197	-0.0148936	0.00480204	0.00198494
X - 24512	X...24512	NA	NA	940	0.0474951	0.070814	0.502575	-0.00529457	0.00480489	0.270781
isobutyrylcarnitine	isobutyrylcarnitine	Amino Acid	Leucine, Isoleucine and Valine Metabolism	944	0.0496778	0.0742808	0.503797	-0.00404555	0.00496094	0.415003
epiandrosterone sulfate	epiandrosterone.sulfate	Lipid	Steroid	957	-0.0458152	0.0688953	0.506212	-0.0133166	0.00467371	0.00447612
X - 17359	X...17359	NA	NA	925	-0.0485195	0.0743981	0.51446	0.0251658	0.00503194	6.81497e-07
4-androsten-3alpha,17alpha-diol monosulfate (2)	X4.androsten.3alpha.17alpha.diol.monosulfate..2.	Lipid	Steroid	913	-0.0451366	0.0712472	0.526552	-0.00535956	0.00483952	0.268388
maleate	maleate	Lipid	Fatty Acid, Dicarboxylate	952	0.0397321	0.0633255	0.530531	0.0153207	0.00426875	0.000348843
1-palmitoyl-2-palmitoleoyl-GPC (16:0/16:1)*	X1.palmitoyl.2.palmitoleoyl.GPC..16.0.16.1..	Lipid	Phospholipid Metabolism	962	0.0442503	0.0709128	0.532769	0.0233464	0.00475699	1.08133e-06
4-vinylguaiacol sulfate	X4.vinylguaiacol.sulfate	Xenobiotics	Food Component/Plant	830	0.0452364	0.0756738	0.550149	0.00118712	0.00515896	0.818064
X - 22379	X...22379	NA	NA	917	-0.0410487	0.0690423	0.552295	-0.0106088	0.0047122	0.0245994
14-HDoHE/17-HDoHE	X14.HDoHE.17.HDoHE	Lipid	Fatty Acid, Monohydroxy	778	0.0465805	0.0784907	0.553051	0.00630148	0.00527254	0.232392
phenol sulfate	phenol.sulfate	Amino Acid	Phenylalanine and Tyrosine Metabolism	956	0.043724	0.0744494	0.557142	-0.00107021	0.00498776	0.830151
3-hydroxypyridine sulfate	X3.hydroxypyridine.sulfate	Xenobiotics	Chemical	955	0.0401359	0.0707266	0.570522	-0.00701374	0.00473708	0.139042
eugenol sulfate	eugenol.sulfate	Xenobiotics	Food Component/Plant	927	0.0409871	0.0737511	0.578516	-0.00169595	0.00492363	0.730585
X - 13835	X...13835	NA	NA	926	-0.0403889	0.0736206	0.583406	0.0219816	0.00493809	9.56833e-06
stachydrine	stachydrine	Xenobiotics	Food Component/Plant	961	0.0391598	0.0717001	0.585082	-0.000289374	0.00481193	0.952059
X - 11438	X...11438	NA	NA	953	-0.040246	0.0740938	0.587135	-0.0171311	0.00496145	0.00057911
X - 15486	X...15486	NA	NA	886	-0.0408934	0.0755834	0.588618	0.0122354	0.00500675	0.0147283
X - 23997	X...23997	NA	NA	846	0.0420328	0.0778991	0.589628	-0.00553569	0.0053787	0.303686
creatine	creatine	Amino Acid	Creatine Metabolism	964	-0.0383197	0.0712219	0.590679	0.00346644	0.00477838	0.468356
X - 12524	X...12524	NA	NA	956	-0.0404741	0.0754306	0.591687	-0.000935157	0.00505714	0.853333
X - 18901	X...18901	NA	NA	951	0.037479	0.0708175	0.596767	-0.012541	0.0047567	0.00851337
threonate	threonate	Cofactors and Vitamins	Ascorbate and Aldarate Metabolism	961	0.0375584	0.0710751	0.597321	-0.0131075	0.00476772	0.00608585
HWESASXX*	HWESASXX.	Peptide	Polypeptide	923	0.0380683	0.0727747	0.601031	0.0097823	0.00489194	0.0458279
X - 23291	X...23291	NA	NA	826	0.0347096	0.0671962	0.605615	-0.00372774	0.00448794	0.406432
glycerol 3-phosphate	glycerol.3.phosphate	Lipid	Glycerolipid Metabolism	958	-0.0372808	0.0726604	0.608011	-0.00650929	0.00487079	0.181738
citraconate/glutaconate	citraconate.glutaconate	Energy	TCA Cycle	936	-0.0381906	0.0752139	0.611742	0.00527207	0.00501514	0.293423
hydroquinone sulfate	hydroquinone.sulfate	Xenobiotics	Drug	939	0.0385054	0.0759286	0.612185	-0.000305672	0.00505042	0.951751
methylsuccinate	methylsuccinate	Amino Acid	Leucine, Isoleucine and Valine Metabolism	955	0.0358131	0.0709362	0.613771	0.000303903	0.00473491	0.948838
myristoylcarnitine	myristoylcarnitine	Lipid	Fatty Acid Metabolism(Acyl Carnitine)	929	-0.0375035	0.0759717	0.621669	0.0114817	0.00509153	0.0243623
3-carboxy-4-methyl-5-propyl-2-furanpropanoate (CMPF)	X3.carboxy.4.methyl.5.propyl.2.furanpropanoate..CMPF.	Lipid	Fatty Acid, Dicarboxylate	963	-0.0315059	0.063972	0.622481	0.00711746	0.0042909	0.0974955
glycerate	glycerate	Carbohydrate	Glycolysis, Gluconeogenesis, and Pyruvate Metabolism	956	0.0335378	0.0689064	0.626572	-0.00418538	0.0046406	0.367334
pyrraline	pyrraline	Xenobiotics	Food Component/Plant	937	-0.0371668	0.0766624	0.627924	-0.00547803	0.00513507	0.286343
N-carbamoylalanine	N.carbamoylalanine	Amino Acid	Alanine and Aspartate Metabolism	834	-0.0377562	0.0790108	0.632874	-0.00454726	0.00536411	0.396838
X - 16944	X...16944	NA	NA	851	0.0351357	0.0739687	0.634903	0.00353961	0.00504846	0.483416
1,7-dimethylurate	X1.7.dimethylurate	Xenobiotics	Xanthine Metabolism	949	-0.0330925	0.0702894	0.637889	0.00757186	0.00473972	0.11048
gamma-glutamylthreonine*	gamma.glutamylthreonine.	Peptide	Gamma-glutamyl Amino Acid	958	-0.0341543	0.0727904	0.639024	-0.00500898	0.00487698	0.304648
trans-4-hydroxyproline	trans.4.hydroxyproline	Amino Acid	Urea cycle; Arginine and Proline Metabolism	956	0.0345356	0.0743128	0.642229	0.000790344	0.00502336	0.875015
glutarylcarnitine (C5)	glutarylcarnitine..C5.	Amino Acid	Lysine Metabolism	937	0.0336272	0.0723751	0.642309	0.00769318	0.00481095	0.110136
X - 14838	X...14838	NA	NA	929	0.033188	0.072534	0.647382	0.0116117	0.00484022	0.0166358
X - 23644	X...23644	NA	NA	936	-0.0339139	0.0742443	0.647929	0.000387654	0.00500011	0.938219
X - 12822	X...12822	NA	NA	913	-0.0338315	0.0749311	0.651735	-0.00269108	0.00503425	0.593088
umbelliferone sulfate	umbelliferone.sulfate	Xenobiotics	Food Component/Plant	816	0.035539	0.0818898	0.664414	0.00345489	0.00550303	0.530299
palmitoylcarnitine	palmitoylcarnitine	Lipid	Fatty Acid Metabolism(Acyl Carnitine)	960	-0.0319284	0.0736921	0.664918	0.0142892	0.00496355	0.00408005
1-palmitoyl-2-linoleoyl-GPI (16:0/18:2)	X1.palmitoyl.2.linoleoyl.GPI..16.0.18.2.	Lipid	Phospholipid Metabolism	963	-0.0318686	0.0740873	0.667183	0.0101825	0.00496645	0.0406087
uracil	uracil	Nucleotide	Pyrimidine Metabolism, Uracil containing	854	-0.0311216	0.0735325	0.67223	0.000805174	0.0049394	0.870549
X - 21441	X...21441	NA	NA	838	0.033551	0.0796804	0.673813	-0.00983742	0.0052848	0.0630299
methyl indole-3-acetate	methyl.indole.3.acetate	Xenobiotics	Food Component/Plant	781	0.0349449	0.0830455	0.674022	0.00447502	0.00562483	0.426515
X - 17185	X...17185	NA	NA	952	0.0284393	0.0682919	0.677184	-0.0012625	0.00461502	0.78448
pregnanediol-3-glucuronide	pregnanediol.3.glucuronide	Lipid	Steroid	901	-0.0316562	0.0764536	0.67893	-0.0229286	0.00527522	1.54096e-05
pelargonate (9:0)	pelargonate..9.0.	Lipid	Medium Chain Fatty Acid	959	-0.0200997	0.0486401	0.679528	-0.0104048	0.00327051	0.00151274
1-stearoyl-GPE (18:0)	X1.stearoyl.GPE..18.0.	Lipid	Lysolipid	959	0.0302114	0.0746294	0.685701	-0.000799411	0.0050008	0.873028
dihydroferulic acid	dihydroferulic.acid	Xenobiotics	Food Component/Plant	862	0.0305823	0.0780885	0.695424	0.00440795	0.00528666	0.404632
X - 23652	X...23652	NA	NA	938	0.0274398	0.0730855	0.707412	0.0202768	0.00487685	3.50799e-05
4-hydroxyhippurate	X4.hydroxyhippurate	Xenobiotics	Benzoate Metabolism	952	0.0277026	0.0740493	0.708405	0.0102718	0.004943	0.0379733
glycodeoxycholate	glycodeoxycholate	Lipid	Secondary Bile Acid Metabolism	784	-0.0308157	0.0831116	0.710906	-0.00636841	0.00573934	0.267508
p-cresol sulfate	p.cresol.sulfate	Amino Acid	Phenylalanine and Tyrosine Metabolism	964	0.0264586	0.0721488	0.713906	-0.0125456	0.00484056	0.00969279
o-cresol sulfate	o.cresol.sulfate	Amino Acid	Phenylalanine and Tyrosine Metabolism	957	0.0219347	0.0604712	0.716887	0.00530115	0.004054	0.191312
X - 12739	X...12739	NA	NA	882	0.0271293	0.0779015	0.727734	0.00599332	0.00511085	0.241247
X - 11905	X...11905	NA	NA	953	0.025901	0.0745226	0.728248	-0.00945041	0.00498678	0.0583825
N-acetylproline	N.acetylproline	Amino Acid	Urea cycle; Arginine and Proline Metabolism	889	-0.0245074	0.0756544	0.74606	0.0136368	0.00504622	0.0070155
3-methylxanthine	X3.methylxanthine	Xenobiotics	Xanthine Metabolism	947	-0.0243144	0.0752071	0.746541	0.00116174	0.00510573	0.820055
deoxycholate	deoxycholate	Lipid	Secondary Bile Acid Metabolism	850	0.0252704	0.0802769	0.752998	0.00189788	0.0055421	0.732099
X - 11452	X...11452	NA	NA	917	-0.0236396	0.0759107	0.755557	0.00763674	0.00512118	0.136251
X - 12906	X...12906	NA	NA	909	-0.0222456	0.0730877	0.760917	-0.00790977	0.0049193	0.108203
X - 16947	X...16947	NA	NA	858	0.0238812	0.0793342	0.763472	0.00374294	0.00530683	0.480811
sebacate (decanedioate)	sebacate..decanedioate.	Lipid	Fatty Acid, Dicarboxylate	876	-0.0147679	0.049632	0.766119	-0.0132307	0.00335149	8.52296e-05
1-(1-enyl-stearoyl)-2-linoleoyl-GPE (P-18:0/18:2)*	X1..1.enyl.stearoyl..2.linoleoyl.GPE..P.18.0.18.2..	Lipid	Plasmalogen	964	0.0218658	0.0738482	0.767224	-0.0155309	0.00495458	0.00177259
X - 12681	X...12681	NA	NA	959	0.0208696	0.0709582	0.768737	0.00274992	0.00476365	0.563892
glycine	glycine	Amino Acid	Glycine, Serine and Threonine Metabolism	957	-0.0208667	0.0716929	0.771071	-0.011354	0.00482135	0.018727
N2,N2-dimethylguanosine	N2.N2.dimethylguanosine	Nucleotide	Purine Metabolism, Guanine containing	939	-0.0213827	0.0740348	0.772783	0.00930416	0.00495032	0.0604846
1-(1-enyl-stearoyl)-2-arachidonoyl-GPE (P-18:0/20:4)*	X1..1.enyl.stearoyl..2.arachidonoyl.GPE..P.18.0.20.4..	Lipid	Plasmalogen	963	-0.0210207	0.0737783	0.775769	-0.000195723	0.00494482	0.968435
hypotaurine	hypotaurine	Amino Acid	Methionine, Cysteine, SAM and Taurine Metabolism	958	0.0194776	0.071081	0.784128	-0.00962096	0.00478372	0.0445855
X - 11850	X...11850	NA	NA	869	-0.0200133	0.0766924	0.794189	-0.0178325	0.00512224	0.000523692
histidylalanine	histidylalanine	Peptide	Dipeptide	878	-0.0181853	0.0728286	0.802878	0.00901758	0.00486216	0.0639819
X - 11440	X...11440	NA	NA	963	0.0171917	0.0708907	0.808437	0.0102255	0.00476305	0.0320554
1-arachidonylglycerol (20:4)	X1.arachidonylglycerol..20.4.	Lipid	Monoacylglycerol	953	0.0177497	0.0746433	0.812092	0.0160828	0.0050156	0.00138809
glutarate (pentanedioate)	glutarate..pentanedioate.	Amino Acid	Lysine Metabolism	956	0.0153258	0.0661762	0.816906	-0.00777336	0.00444589	0.0807096
X - 11491	X...11491	NA	NA	932	-0.0175611	0.0761057	0.817563	0.0129968	0.0050932	0.0108754
beta-alanine	beta.alanine	Nucleotide	Pyrimidine Metabolism, Uracil containing	917	-0.0166529	0.0726034	0.818634	0.0102676	0.00483009	0.0337907
chenodeoxycholate	chenodeoxycholate	Lipid	Primary Bile Acid Metabolism	820	-0.0180967	0.0816396	0.824629	0.00112609	0.00533967	0.833024
X - 12013	X...12013	NA	NA	820	-0.0153865	0.0786933	0.84503	-0.0146093	0.00522469	0.00529169
16a-hydroxy DHEA 3-sulfate	X16a.hydroxy.DHEA.3.sulfate	Lipid	Steroid	956	0.0145992	0.0748312	0.84536	0.0108145	0.00507039	0.0331893
1-stearoyl-2-linoleoyl-GPI (18:0/18:2)	X1.stearoyl.2.linoleoyl.GPI..18.0.18.2.	Lipid	Phospholipid Metabolism	960	-0.0143239	0.074119	0.8468	-0.00968078	0.00497305	0.0518683
X - 12726	X...12726	NA	NA	799	0.0158422	0.0822134	0.847246	-0.00956639	0.0054488	0.0795252
5-dodecenoate (12:1n7)	X5.dodecenoate..12.1n7.	Lipid	Medium Chain Fatty Acid	961	-0.0142459	0.0739343	0.847247	0.0163556	0.00496135	0.00101445
X - 12231	X...12231	NA	NA	899	0.014655	0.0766987	0.848512	0.00648185	0.00518427	0.211519
X - 12411	X...12411	NA	NA	935	0.0137835	0.0724735	0.849203	-0.00400536	0.00484213	0.40834
5-acetylamino-6-amino-3-methyluracil	X5.acetylamino.6.amino.3.methyluracil	Xenobiotics	Xanthine Metabolism	952	0.0135243	0.0716557	0.850336	0.00328718	0.00484566	0.497698
X - 21785	X...21785	NA	NA	956	-0.0131197	0.0708714	0.853174	0.0209227	0.00474566	1.15727e-05
5alpha-pregnan-3beta,20alpha-diol disulfate	X5alpha.pregnan.3beta.20alpha.diol.disulfate	Lipid	Steroid	942	-0.0131986	0.0758448	0.861886	-0.00116789	0.00507739	0.818128
4-androsten-3alpha,17alpha-diol monosulfate (3)	X4.androsten.3alpha.17alpha.diol.monosulfate..3.	Lipid	Steroid	958	0.0112403	0.0650879	0.862929	-0.00694894	0.00440522	0.115026
undecanedioate	undecanedioate	Lipid	Fatty Acid, Dicarboxylate	926	-0.00694976	0.040532	0.863897	-0.00874014	0.00269559	0.00122769
X - 24542	X...24542	NA	NA	881	-0.0132293	0.0773136	0.864175	-0.00315908	0.00524093	0.546816
X - 12824	X...12824	NA	NA	926	0.0126141	0.0761138	0.868408	0.00873007	0.00509695	0.0870837
gamma-glutamyltyrosine	gamma.glutamyltyrosine	Peptide	Gamma-glutamyl Amino Acid	958	-0.0111585	0.0711743	0.875454	0.017905	0.00477522	0.00018776
ethylmalonate	ethylmalonate	Amino Acid	Leucine, Isoleucine and Valine Metabolism	953	0.0111206	0.0728007	0.878625	0.00832689	0.00487148	0.0877186
X - 24337	X...24337	NA	NA	950	-0.0109048	0.0741745	0.883151	0.0211543	0.00497479	2.32492e-05
X - 24747	X...24747	NA	NA	837	-0.0114906	0.0789036	0.88425	-0.0158089	0.00541106	0.00357611
X - 21729	X...21729	NA	NA	957	0.00986771	0.0691478	0.886553	0.00492778	0.00464554	0.289068
X - 02249	X...02249	NA	NA	962	-0.00957922	0.0678706	0.887789	0.00250653	0.00455171	0.581982
X - 24293	X...24293	NA	NA	904	0.0107366	0.0768737	0.888955	-0.00659649	0.00517246	0.202528
X - 21339	X...21339	NA	NA	956	-0.0101849	0.0739772	0.890525	0.00430188	0.0049701	0.386953
X - 11444	X...11444	NA	NA	927	-0.00974275	0.0724193	0.893011	0.00380316	0.00488421	0.436375
1,2-dipalmitoyl-GPC (16:0/16:0)	X1.2.dipalmitoyl.GPC..16.0.16.0.	Lipid	Phospholipid Metabolism	959	-0.00975846	0.0751405	0.896697	0.00789701	0.00504422	0.117783
3-hydroxyhippurate	X3.hydroxyhippurate	Xenobiotics	Benzoate Metabolism	944	0.00963151	0.0745479	0.897228	0.00690371	0.00500893	0.168444
thymol sulfate	thymol.sulfate	Xenobiotics	Food Component/Plant	805	-0.0104151	0.0807621	0.897421	0.0124462	0.00534536	0.0201371
X - 21411	X...21411	NA	NA	850	-0.00940069	0.0749191	0.900175	-0.0156574	0.00517533	0.00255788
X - 24348	X...24348	NA	NA	892	-0.00864127	0.0737731	0.906781	0.000878038	0.00493833	0.85892
3-methyl catechol sulfate (1)	X3.methyl.catechol.sulfate..1.	Xenobiotics	Benzoate Metabolism	946	-0.00782331	0.0671706	0.907305	-0.0038105	0.0044979	0.397113
N-acetylaspartate (NAA)	N.acetylaspartate..NAA.	Amino Acid	Alanine and Aspartate Metabolism	955	-0.00842466	0.0728737	0.907989	-0.00461484	0.00489163	0.345707
cinnamoylglycine	cinnamoylglycine	Xenobiotics	Food Component/Plant	898	0.00804089	0.0736669	0.913106	-0.0180471	0.00499487	0.000319327
ergothioneine	ergothioneine	Xenobiotics	Food Component/Plant	931	-0.00765503	0.0704218	0.913462	0.007473	0.00477217	0.117699
X - 24585	X...24585	NA	NA	926	0.00815524	0.0760187	0.914591	0.00197822	0.0050977	0.698059
21-hydroxypregnenolone disulfate	X21.hydroxypregnenolone.disulfate	Lipid	Steroid	954	0.00751278	0.0733405	0.918431	0.00243342	0.00493469	0.622038
1-dihomo-linolenylglycerol (20:3)	X1.dihomo.linolenylglycerol..20.3.	Lipid	Monoacylglycerol	950	0.00598368	0.0749533	0.936388	0.0139369	0.00501259	0.00553692
X - 17685	X...17685	NA	NA	838	0.00628091	0.0801017	0.937519	0.0125836	0.00549253	0.0222085
X - 12511	X...12511	NA	NA	954	-0.00501762	0.0707848	0.943504	-0.0136283	0.00475574	0.00425286
X - 17438	X...17438	NA	NA	850	-0.00346116	0.0583175	0.952687	-0.0142682	0.00399295	0.000372287
X - 12544	X...12544	NA	NA	792	-0.00473806	0.08134	0.953564	-0.00928472	0.00546386	0.0896557
homostachydrine*	homostachydrine.	Xenobiotics	Food Component/Plant	925	0.00421316	0.0747387	0.955058	0.00319219	0.00500731	0.523954
glycodeoxycholate sulfate	glycodeoxycholate.sulfate	Lipid	Secondary Bile Acid Metabolism	909	0.00418889	0.0764793	0.956333	-0.00507911	0.00523715	0.332393
X - 12680	X...12680	NA	NA	959	-0.00403728	0.0752196	0.957207	0.000351266	0.00505487	0.944614
p-cresol-glucuronide*	p.cresol.glucuronide.	Amino Acid	Phenylalanine and Tyrosine Metabolism	844	0.00403084	0.0769625	0.958243	-0.00902682	0.00516553	0.0809127
3-indoxyl sulfate	X3.indoxyl.sulfate	Amino Acid	Tryptophan Metabolism	954	0.00373635	0.0732677	0.959339	-0.00515761	0.00488964	0.291782
N-acetylglycine	N.acetylglycine	Amino Acid	Glycine, Serine and Threonine Metabolism	948	0.00327067	0.0744434	0.964965	-0.0189295	0.00497062	0.00014894
X - 11847	X...11847	NA	NA	956	-0.00281364	0.0736821	0.969547	0.0152177	0.00497376	0.00227809
X - 11564	X...11564	NA	NA	940	0.00243627	0.0712993	0.972749	0.0234536	0.00477618	1.07075e-06
phenylpyruvate	phenylpyruvate	Amino Acid	Phenylalanine and Tyrosine Metabolism	944	0.00242537	0.0744875	0.974032	0.00533888	0.00498895	0.28483
1-arachidonoyl-GPE (20:4n6)*	X1.arachidonoyl.GPE..20.4n6..	Lipid	Lysolipid	958	0.00238856	0.0761386	0.97498	-0.00643918	0.00509779	0.206849
1-palmitoyl-2-arachidonoyl-GPI (16:0/20:4)*	X1.palmitoyl.2.arachidonoyl.GPI..16.0.20.4..	Lipid	Phospholipid Metabolism	952	-0.00188923	0.0737209	0.97956	0.0187667	0.00493246	0.00015102
X - 12230	X...12230	NA	NA	945	0.00139267	0.0739021	0.984969	-0.00843339	0.00494537	0.0884653
myristoleoylcarnitine*	myristoleoylcarnitine.	Lipid	Fatty Acid Metabolism(Acyl Carnitine)	958	0.00124254	0.0758902	0.98694	0.00789221	0.00508087	0.120678
4-acetylphenol sulfate	X4.acetylphenol.sulfate	Xenobiotics	Drug	880	-0.000611334	0.0758304	0.993569	-0.00478405	0.00507245	0.345866
1,3,7-trimethylurate	X1.3.7.trimethylurate	Xenobiotics	Xanthine Metabolism	905	-0.000435019	0.0760895	0.99544	0.00740651	0.00510652	0.147292

## Sheet: Supp_Table3
Supplementary Table 3: Sensitivity Analysis for T2D
					Original T2D results			Statins					ACE_ARB_CC					beta blockers					Thyroxine					Aspirin					Creatinine					BUN				HDL					LDL
Metabolite	R Name	pathway	subpathway	DF	beta-T2D	sebeta-T2D	p-valT2D	beta_sensitivity_T2D	pval_sensitivity_T2D	changed?	became not sig	became_sig	beta_sensitivity_T2D	pval_sensitivity_T2D	changed?	became not sig	became sig	beta_sensitivity_T2D	pval_sensitivity_T2D	changed?	became not sig	became_sig	beta_sensitivity_T2D	pval_sensitivity_T2D	changed?	became not sig	became_sig	beta_sensitivity_T2D	pval_sensitivity_T2D	changed?	became not sig	became_sig	beta_sensitivity_T2D	pval_sensitivity_T2D	changed?	became not sig	became_sig	beta_sensitivity_T2D	pval_sensitivity_T2D	changed?	became_sig	beta_sensitivity_T2D	pval_sensitivity_T2D	changed?	became not sig	became_sig	beta_sensitivity_T2D	pval_sensitivity_T2D	changed?
1,5-anhydroglucitol (1,5-AG)	X1.5.anhydroglucitol..1.5.AG.	Carbohydrate	Glycolysis, Gluconeogenesis, and Pyruvate Metabolism	962	-1.19788	0.0630924	1.62661e-68	-1.19363	3.5058e-64	0	0	0	-1.19802	1.62028e-65	0	0	0	-1.19725	2.42347e-68	0	0	0	-1.1967	1.75325e-68	0	0	0	-1.17605	4.03749e-65	0	0	0	-1.20411	2.70581e-69	0	0	0	-1.20046	1.72029e-68	0	0	-1.16855	7.66906e-64	0	0	0	-1.20887	1.30769e-67	0
X - 24678	X...24678	NA	NA	960	1.07948	0.0611826	1.46679e-60	1.06379	1.42203e-55	0	0	0	1.08527	1.88402e-58	0	0	0	1.07946	1.87834e-60	0	0	0	1.07781	1.29046e-60	0	0	0	1.07286	1.83004e-58	0	0	0	1.08491	3.50492e-61	0	0	0	1.08432	7.47584e-61	0	0	1.06095	5.98683e-57	0	0	0	1.09726	1.65526e-60	0
mannose	mannose	Carbohydrate	Fructose, Mannose and Galactose Metabolism	961	0.925604	0.0592696	3.62869e-49	0.92942	1.61837e-46	0	0	0	0.929485	2.7132e-47	0	0	0	0.926861	3.21985e-49	0	0	0	0.923719	2.45847e-49	0	0	0	0.922973	1.08736e-47	0	0	0	0.928575	2.15995e-49	0	0	0	0.927443	3.77779e-49	0	0	0.904043	1.28417e-45	0	0	0	0.949431	4.63694e-50	0
glucose	glucose	Carbohydrate	Glycolysis, Gluconeogenesis, and Pyruvate Metabolism	961	0.905384	0.0627274	6.88427e-43	0.916251	3.91637e-41	0	0	0	0.90528	6.20234e-41	0	0	0	0.906444	6.50329e-43	0	0	0	0.903209	4.43619e-43	0	0	0	0.902193	1.53525e-41	0	0	0	0.909269	3.36421e-43	0	0	0	0.907341	6.89099e-43	0	0	0.895744	1.48533e-40	0	0	0	0.932243	5.37621e-44	0
X - 11537	X...11537	NA	NA	960	-0.935212	0.0677975	1.2696e-39	-0.92287	2.4531e-36	0	0	0	-0.914633	1.80782e-36	0	0	0	-0.936003	1.29621e-39	0	0	0	-0.933158	9.80152e-40	0	0	0	-0.937935	7.19027e-39	0	0	0	-0.936321	1.25017e-39	0	0	0	-0.933128	2.45755e-39	0	0	-0.909807	1.57569e-36	0	0	0	-0.918739	2.39573e-37	0
gluconate	gluconate	Xenobiotics	Food Component/Plant	944	0.84651	0.0642307	1.56661e-36	0.85577	5.23272e-35	0	0	0	0.825289	1.72419e-33	0	0	0	0.846103	1.96205e-36	0	0	0	0.84516	1.48349e-36	0	0	0	0.857225	1.95726e-36	0	0	0	0.832844	8.04954e-37	0	0	0	0.82234	1.54522e-36	0	0	0.837068	1.38233e-34	0	0	0	0.844459	2.91069e-35	0
palmitoylcholine	palmitoylcholine	Lipid	Fatty Acid Metabolism (Acyl Choline)	958	-0.899	0.0693427	1.563e-35	-0.913943	2.35149e-34	0	0	0	-0.884884	5.16751e-33	0	0	0	-0.899638	1.62635e-35	0	0	0	-0.89765	9.35695e-36	0	0	0	-0.903702	5.75491e-35	0	0	0	-0.898956	1.95499e-35	0	0	0	-0.894347	4.36922e-35	0	0	-0.880834	3.5991e-33	0	0	0	-0.884897	1.44438e-33	0
X - 24718	X...24718	NA	NA	959	0.841935	0.0678528	6.79005e-33	0.864013	2.19996e-32	0	0	0	0.83693	4.3387e-31	0	0	0	0.843475	5.84928e-33	0	0	0	0.840976	7.69398e-33	0	0	0	0.841987	4.81994e-32	0	0	0	0.846711	3.07578e-33	0	0	0	0.843883	6.83099e-33	0	0	0.839646	1.37898e-31	0	0	0	0.856594	6.31589e-33	0
arachidonoylcholine	arachidonoylcholine	Lipid	Phospholipid Metabolism	954	-0.856102	0.070875	2.32405e-31	-0.901603	2.23872e-32	0	0	0	-0.852346	1.11064e-29	0	0	0	-0.857944	1.93314e-31	0	0	0	-0.854344	1.76653e-31	0	0	0	-0.866142	3.17666e-31	0	0	0	-0.856878	2.51145e-31	0	0	0	-0.856877	2.89074e-31	0	0	-0.840235	2.38315e-29	0	0	0	-0.856702	1.93004e-30	0
oleoylcholine	oleoylcholine	Lipid	Phospholipid Metabolism	944	-0.839273	0.0704793	1.46475e-30	-0.860171	5.59771e-30	0	0	0	-0.827882	1.87567e-28	0	0	0	-0.840084	1.48627e-30	0	0	0	-0.838362	1.08287e-30	0	0	0	-0.846686	2.74414e-30	0	0	0	-0.839281	1.78797e-30	0	0	0	-0.835237	3.5223e-30	0	0	-0.819306	2.7429e-28	0	0	0	-0.824035	1.13307e-28	0
1-(1-enyl-palmitoyl)-GPC (P-16:0)*	X1..1.enyl.palmitoyl..GPC..P.16.0..	Lipid	Lysoplasmalogen	963	-0.813745	0.0691085	5.36336e-30	-0.785956	1.59052e-26	0	0	0	-0.78978	3.34054e-27	0	0	0	-0.813298	6.45004e-30	0	0	0	-0.812493	6.01652e-30	0	0	0	-0.809309	6.02872e-29	0	0	0	-0.814876	5.33168e-30	0	0	0	-0.818524	3.28555e-30	0	0	-0.763873	3.73863e-26	0	0	0	-0.76312	2.55442e-26	0
X - 11871	X...11871	NA	NA	890	-0.834115	0.0725002	1.17956e-28	-0.850019	1.05085e-27	0	0	0	-0.831662	2.94414e-27	0	0	0	-0.835833	1.16412e-28	0	0	0	-0.833729	9.37044e-29	0	0	0	-0.847552	9.06572e-29	0	0	0	-0.835065	1.22379e-28	0	0	0	-0.833652	1.65489e-28	0	0	-0.826147	2.45037e-27	0	0	0	-0.814834	1.08071e-26	0
ribonate	ribonate	Carbohydrate	Pentose Metabolism	949	0.75332	0.0688377	2.47986e-26	0.758394	5.53223e-25	0	0	0	0.742877	1.55895e-24	0	0	0	0.754098	2.52967e-26	0	0	0	0.751404	2.49865e-26	0	0	0	0.753752	1.18528e-25	0	0	0	0.742113	6.48506e-26	0	0	0	0.732065	1.674e-25	0	0	0.752359	2.20946e-25	0	0	0	0.755259	1.22353e-25	0
X - 22102	X...22102	NA	NA	946	0.742376	0.0681181	3.8926e-26	0.69248	6.87416e-22	0	0	0	0.704356	6.75582e-23	0	0	0	0.740384	5.80123e-26	0	0	0	0.743149	3.24729e-26	0	0	0	0.728581	1.07671e-24	0	0	0	0.739125	6.70838e-26	0	0	0	0.730133	1.78083e-25	0	0	0.710415	1.83296e-23	0	0	0	0.718398	5.36966e-24	0
arabonate/xylonate	arabonate.xylonate	Carbohydrate	Pentose Metabolism	950	0.726174	0.067324	1.14298e-25	0.722785	7.54672e-24	0	0	0	0.689939	1.83101e-22	0	0	0	0.726367	1.26794e-25	0	0	0	0.724801	1.25056e-25	0	0	0	0.730611	3.01984e-25	0	0	0	0.709961	9.62659e-26	0	0	0	0.701598	3.24194e-25	0	0	0.718698	2.35578e-24	0	0	0	0.71468	3.62877e-24	0
sphingomyelin (d18:2/14:0, d18:1/14:1)*	sphingomyelin..d18.2.14.0..d18.1.14.1..	Lipid	Sphingolipid Metabolism	963	-0.700001	0.0658173	4.69605e-25	-0.671312	6.68204e-22	0	0	0	-0.676993	1.43908e-22	0	0	0	-0.698373	6.35456e-25	0	0	0	-0.698559	5.02579e-25	0	0	0	-0.706657	7.43515e-25	0	0	0	-0.701572	4.22829e-25	0	0	0	-0.706704	1.99667e-25	0	0	-0.627887	1.7384e-20	0	0	0	-0.632007	7.18421e-21	0
citrulline	citrulline	Amino Acid	Urea cycle; Arginine and Proline Metabolism	964	-0.735776	0.0703278	2.44859e-24	-0.723784	3.41117e-22	0	0	0	-0.746793	7.52523e-24	0	0	0	-0.737518	2.05601e-24	0	0	0	-0.735786	2.59813e-24	0	0	0	-0.691529	1.61241e-21	0	0	0	-0.765684	5.70696e-29	0	0	0	-0.771939	3.42624e-28	0	0	-0.742745	7.34021e-24	0	0	0	-0.736026	1.33614e-23	0
X - 13529	X...13529	NA	NA	955	0.700251	0.0670294	2.90094e-24	0.655348	2.30487e-20	0	0	0	0.65906	6.12978e-21	0	0	0	0.699594	3.48612e-24	0	0	0	0.698626	2.91456e-24	0	0	0	0.692969	3.2633e-23	0	0	0	0.698383	4.18921e-24	0	0	0	0.686684	1.4127e-23	0	0	0.671769	7.88065e-22	0	0	0	0.684809	1.23866e-22	0
1-(1-enyl-palmitoyl)-2-palmitoleoyl-GPC (P-16:0/16:1)*	X1..1.enyl.palmitoyl..2.palmitoleoyl.GPC..P.16.0.16.1..	Lipid	Plasmalogen	954	-0.728436	0.0700238	4.41705e-24	-0.656224	3.9573e-19	0	0	0	-0.704665	9.5981e-22	0	0	0	-0.726645	5.93796e-24	0	0	0	-0.727643	4.64688e-24	0	0	0	-0.71596	8.55909e-23	0	0	0	-0.733472	2.12106e-24	0	0	0	-0.733335	2.69832e-24	0	0	-0.647011	1.73567e-19	0	0	0	-0.696994	9.84688e-22	0
N-acetyltaurine	N.acetyltaurine	Amino Acid	Methionine, Cysteine, SAM and Taurine Metabolism	958	-0.716261	0.0702144	2.88324e-23	-0.733043	9.07301e-23	0	0	0	-0.74713	5.7113e-24	0	0	0	-0.718372	2.24068e-23	0	0	0	-0.716219	3.06842e-23	0	0	0	-0.674683	1.22833e-20	0	0	0	-0.737206	6.53302e-26	0	0	0	-0.747392	2.58534e-26	0	0	-0.713062	2.83824e-22	0	0	0	-0.750039	1.21308e-24	0
X - 18889	X...18889	NA	NA	943	0.683604	0.0677655	8.53958e-23	0.6549	7.11986e-20	0	0	0	0.653159	3.88763e-20	0	0	0	0.682568	1.08796e-22	0	0	0	0.683802	8.37372e-23	0	0	0	0.676221	7.89879e-22	0	0	0	0.683971	9.18216e-23	0	0	0	0.675558	2.67372e-22	0	0	0.655343	1.68363e-20	0	0	0	0.674928	1.35403e-21	0
3-hydroxydecanoate	X3.hydroxydecanoate	Lipid	Fatty Acid, Monohydroxy	955	0.70922	0.0705147	1.09131e-22	0.704479	4.79216e-21	0	0	0	0.704181	2.22434e-21	0	0	0	0.710472	1.00598e-22	0	0	0	0.707142	1.10041e-22	0	0	0	0.691678	3.54943e-21	0	0	0	0.722164	9.91525e-24	0	0	0	0.717054	4.21554e-23	0	0	0.705692	1.13791e-21	0	0	0	0.698124	2.01758e-21	0
X - 11315	X...11315	NA	NA	925	-0.710075	0.0713508	3.09535e-22	-0.783373	3.85569e-25	0	0	0	-0.72017	7.04167e-22	0	0	0	-0.711227	2.97606e-22	0	0	0	-0.709036	3.58155e-22	0	0	0	-0.713137	7.2351e-22	0	0	0	-0.706134	5.09588e-22	0	0	0	-0.704554	7.09239e-22	0	0	-0.665357	2.46947e-19	0	0	0	-0.713742	9.31809e-22	0
sphingomyelin (d18:2/24:1, d18:1/24:2)*	sphingomyelin..d18.2.24.1..d18.1.24.2..	Lipid	Sphingolipid Metabolism	964	-0.70192	0.0706911	3.45185e-22	-0.652058	2.11091e-18	0	0	0	-0.67613	7.29468e-20	0	0	0	-0.700821	4.28354e-22	0	0	0	-0.701372	3.82896e-22	0	0	0	-0.678798	1.91095e-20	0	0	0	-0.707808	1.49966e-22	0	0	0	-0.714147	6.05784e-23	0	0	-0.645172	1.05692e-18	0	0	0	-0.62372	4.84935e-18	0
inosine	inosine	Nucleotide	Purine Metabolism, (Hypo)Xanthine/Inosine containing	963	-0.638799	0.0670913	1.33227e-20	-0.656108	2.77204e-20	0	0	0	-0.676098	7.2197e-22	0	0	0	-0.634372	2.06927e-20	0	0	0	-0.63906	1.3473e-20	0	0	0	-0.618107	5.39685e-19	0	0	0	-0.64124	1.03998e-20	0	0	0	-0.644788	6.79664e-21	0	0	-0.62692	3.10802e-19	0	0	0	-0.670727	6.64596e-22	0
X - 15497	X...15497	NA	NA	961	0.642494	0.0680459	2.67964e-20	0.588864	1.73457e-16	0	0	0	0.596607	3.97508e-17	0	0	0	0.642016	3.08424e-20	0	0	0	0.640763	2.80037e-20	0	0	0	0.630225	3.71751e-19	0	0	0	0.638802	4.46871e-20	0	0	0	0.631098	1.04995e-19	0	0	0.614461	3.6446e-18	0	0	0	0.621077	1.37207e-18	0
2'-deoxyuridine	X2..deoxyuridine	Nucleotide	Pyrimidine Metabolism, Uracil containing	922	-0.590866	0.0640129	1.80039e-19	-0.550212	3.14864e-16	0	0	0	-0.601053	3.5708e-19	0	0	0	-0.590208	2.18797e-19	0	0	0	-0.590636	1.82461e-19	0	0	0	-0.549304	6.55867e-17	0	0	0	-0.596595	8.10632e-20	0	0	0	-0.60489	2.16392e-20	0	0	-0.575902	5.28752e-18	0	0	0	-0.597329	3.59148e-19	0
dihomo-linolenoyl-choline	dihomo.linolenoyl.choline	Lipid	Phospholipid Metabolism	882	-0.691807	0.0755777	3.7467e-19	-0.685336	1.41301e-17	0	0	0	-0.681005	8.97415e-18	0	0	0	-0.69056	4.8581e-19	0	0	0	-0.691685	2.95179e-19	0	0	0	-0.702188	3.45275e-19	0	0	0	-0.688528	5.98026e-19	0	0	0	-0.684411	9.75391e-19	0	0	-0.67333	1.18344e-17	0	0	0	-0.662213	3.34163e-17	0
3-hydroxyoctanoate	X3.hydroxyoctanoate	Lipid	Fatty Acid, Monohydroxy	950	0.661759	0.0724195	3.76201e-19	0.623911	2.93655e-16	0	0	0	0.633449	5.23841e-17	0	0	0	0.661488	4.26604e-19	0	0	0	0.659548	4.1228e-19	0	0	0	0.643846	8.47149e-18	0	0	0	0.668041	1.68265e-19	0	0	0	0.659483	5.76923e-19	0	0	0.654702	3.93488e-18	0	0	0	0.634271	2.56033e-17	0
1,2-distearoyl-GPC (18:0/18:0)	X1.2.distearoyl.GPC..18.0.18.0.	Lipid	Phospholipid Metabolism	923	-0.661215	0.0730171	7.91301e-19	-0.65624	1.93985e-17	0	0	0	-0.63708	7.98654e-17	0	0	0	-0.661586	8.47814e-19	0	0	0	-0.660941	8.01359e-19	0	0	0	-0.654186	5.51431e-18	0	0	0	-0.65927	1.09653e-18	0	0	0	-0.666699	4.99868e-19	0	0	-0.627611	1.07889e-16	0	0	0	-0.576624	6.88194e-15	0
fructose	fructose	Carbohydrate	Fructose, Mannose and Galactose Metabolism	963	0.618626	0.0710007	1.27423e-17	0.640229	1.35688e-17	0	0	0	0.606096	3.08421e-16	0	0	0	0.623041	6.9076e-18	0	0	0	0.616725	1.36077e-17	0	0	0	0.607747	1.17982e-16	0	0	0	0.625133	5.4609e-18	0	0	0	0.620001	1.28389e-17	0	0	0.630802	1.37011e-17	0	0	0	0.649904	1.002e-18	0
cysteine-glutathione disulfide	cysteine.glutathione.disulfide	Amino Acid	Glutathione Metabolism	902	-0.575914	0.0661161	1.42579e-17	-0.589177	3.46615e-17	0	0	0	-0.612962	7.64123e-19	0	0	0	-0.577225	1.24623e-17	0	0	0	-0.575873	1.48581e-17	0	0	0	-0.568336	1.00897e-16	0	0	0	-0.585664	3.52563e-18	0	0	0	-0.596247	8.13954e-19	0	0	-0.569892	1.06576e-16	0	0	0	-0.590636	9.51758e-18	0
1-linoleoyl-GPC (18:2)	X1.linoleoyl.GPC..18.2.	Lipid	Lysolipid	964	-0.595567	0.0689805	2.4244e-17	-0.559715	1.16239e-14	0	0	0	-0.5849	4.80623e-16	0	0	0	-0.594279	2.97376e-17	0	0	0	-0.595207	2.61829e-17	0	0	0	-0.58701	1.74794e-16	0	0	0	-0.591609	3.94927e-17	0	0	0	-0.593139	3.77335e-17	0	0	-0.554913	6.80882e-15	0	0	0	-0.534304	3.3522e-14	0
X - 17166	X...17166	NA	NA	956	-0.574242	0.0671922	4.97566e-17	-0.584254	1.73366e-16	0	0	0	-0.626191	3.63964e-19	0	0	0	-0.571319	6.98027e-17	0	0	0	-0.57458	4.74989e-17	0	0	0	-0.542942	3.81496e-15	0	0	0	-0.584737	9.34665e-18	0	0	0	-0.588647	6.56915e-18	0	0	-0.564013	5.75119e-16	0	0	0	-0.582909	5.63526e-17	0
cys-gly, oxidized	cys.gly..oxidized	Amino Acid	Glutathione Metabolism	877	-0.55485	0.0649666	5.85231e-17	-0.615441	2.45428e-19	0	0	0	-0.594258	3.04278e-18	0	0	0	-0.555654	4.94947e-17	0	0	0	-0.555572	5.42894e-17	0	0	0	-0.521698	7.14154e-15	0	0	0	-0.571636	4.50296e-18	0	0	0	-0.576277	3.35127e-18	0	0	-0.559264	1.32207e-16	0	0	0	-0.586458	4.25436e-18	0
leucylalanine	leucylalanine	Peptide	Dipeptide	914	-0.609341	0.0717922	8.44414e-17	-0.633834	6.86729e-17	0	0	0	-0.632253	3.85793e-17	0	0	0	-0.607828	1.03981e-16	0	0	0	-0.609152	8.60099e-17	0	0	0	-0.596034	9.02289e-16	0	0	0	-0.607594	1.13754e-16	0	0	0	-0.617496	3.88654e-17	0	0	-0.582747	4.60869e-15	0	0	0	-0.61397	1.62243e-16	0
7-methylguanine	X7.methylguanine	Nucleotide	Purine Metabolism, Guanine containing	957	-0.616034	0.0727516	9.33035e-17	-0.650509	2.25849e-17	0	0	0	-0.632604	8.69945e-17	0	0	0	-0.622641	3.39052e-17	0	0	0	-0.616059	9.69416e-17	0	0	0	-0.576224	1.13265e-14	0	0	0	-0.637882	7.06097e-19	0	0	0	-0.642429	1.24904e-18	0	0	-0.624265	1.51324e-16	0	0	0	-0.658425	1.99073e-18	0
glutamine	glutamine	Amino Acid	Glutamate Metabolism	962	-0.607132	0.071747	9.6868e-17	-0.62946	9.14238e-17	0	0	0	-0.629139	4.90621e-17	0	0	0	-0.606822	1.06987e-16	0	0	0	-0.607187	1.00305e-16	0	0	0	-0.586941	2.05098e-15	0	0	0	-0.61054	6.92e-17	0	0	0	-0.617688	2.83811e-17	0	0	-0.596068	1.20587e-15	0	0	0	-0.61316	1.60499e-16	0
docosahexaenoylcholine	docosahexaenoylcholine	Lipid	Phospholipid Metabolism	808	-0.671239	0.079343	1.24668e-16	-0.706324	4.43866e-17	0	0	0	-0.656651	2.90175e-15	0	0	0	-0.669801	1.60442e-16	0	0	0	-0.672912	8.60398e-17	0	0	0	-0.689563	4.42126e-17	0	0	0	-0.671216	1.35382e-16	0	0	0	-0.669199	1.65159e-16	0	0	-0.640941	5.99987e-15	0	0	0	-0.639366	8.32377e-15	0
lactosyl-N-palmitoyl-sphingosine	lactosyl.N.palmitoyl.sphingosine	Lipid	Sphingolipid Metabolism	963	-0.595106	0.0712384	2.28807e-16	-0.521078	2.21922e-12	0	0	0	-0.544881	1.60864e-13	0	0	0	-0.593438	2.86737e-16	0	0	0	-0.595561	2.24292e-16	0	0	0	-0.571714	6.36887e-15	0	0	0	-0.597046	1.9944e-16	0	0	0	-0.600733	1.36194e-16	0	0	-0.574627	7.16095e-15	0	0	0	-0.505621	1.80966e-12	0
5-bromotryptophan	X5.bromotryptophan	Amino Acid	Phenylalanine and Tyrosine Metabolism	940	-0.598378	0.0717466	2.62089e-16	-0.630746	8.84038e-17	0	0	0	-0.592275	2.71772e-15	0	0	0	-0.59812	2.83717e-16	0	0	0	-0.597791	2.7866e-16	0	0	0	-0.586545	2.33762e-15	0	0	0	-0.594407	4.20205e-16	0	0	0	-0.591433	6.32985e-16	0	0	-0.623892	6.0567e-17	0	0	0	-0.599391	7.51846e-16	0
2-hydroxybutyrate/2-hydroxyisobutyrate	X2.hydroxybutyrate.2.hydroxyisobutyrate	Amino Acid	Methionine, Cysteine, SAM and Taurine Metabolism	959	0.588566	0.0712451	4.76005e-16	0.582683	8.85677e-15	0	0	0	0.560885	3.89402e-14	0	0	0	0.591773	3.31876e-16	0	0	0	0.587003	5.02359e-16	0	0	0	0.585116	1.78976e-15	0	0	0	0.59881	1.13118e-16	0	0	0	0.586646	6.80323e-16	0	0	0.573583	8.29941e-15	0	0	0	0.596124	6.30384e-16	0
1-(1-enyl-palmitoyl)-2-oleoyl-GPC (P-16:0/18:1)*	X1..1.enyl.palmitoyl..2.oleoyl.GPC..P.16.0.18.1..	Lipid	Plasmalogen	963	-0.591751	0.0719395	6.24941e-16	-0.530437	1.69349e-12	0	0	0	-0.569279	3.01457e-14	0	0	0	-0.590205	7.72511e-16	0	0	0	-0.590612	6.85939e-16	0	0	0	-0.582518	4.11378e-15	0	0	0	-0.597089	3.3914e-16	0	0	0	-0.603033	1.68657e-16	0	0	-0.484646	2.01941e-11	0	0	0	-0.533778	3.92381e-13	0
guanidinoacetate	guanidinoacetate	Amino Acid	Creatine Metabolism	959	-0.526012	0.0643797	9.64268e-16	-0.497249	1.83138e-13	0	0	0	-0.510011	2.93886e-14	0	0	0	-0.524499	1.20659e-15	0	0	0	-0.525606	1.04591e-15	0	0	0	-0.524978	2.63384e-15	0	0	0	-0.525638	1.09927e-15	0	0	0	-0.516105	3.02711e-15	0	0	-0.51452	1.27225e-14	0	0	0	-0.486339	1.82929e-13	0
1-(1-enyl-palmitoyl)-2-linoleoyl-GPC (P-16:0/18:2)*	X1..1.enyl.palmitoyl..2.linoleoyl.GPC..P.16.0.18.2..	Lipid	Plasmalogen	961	-0.579458	0.0711385	1.1673e-15	-0.497832	1.62739e-11	0	0	0	-0.551902	8.82828e-14	0	0	0	-0.576301	1.62412e-15	0	0	0	-0.579057	1.25927e-15	0	0	0	-0.579626	2.87267e-15	0	0	0	-0.579625	1.24714e-15	0	0	0	-0.584264	7.71346e-16	0	0	-0.476126	2.86348e-11	0	0	0	-0.511388	1.58369e-12	0
taurine	taurine	Amino Acid	Methionine, Cysteine, SAM and Taurine Metabolism	962	-0.572193	0.0709568	2.18417e-15	-0.578052	1.02757e-14	0	0	0	-0.570516	1.27618e-14	0	0	0	-0.572885	2.14374e-15	0	0	0	-0.570506	2.3438e-15	0	0	0	-0.559529	1.94332e-14	0	0	0	-0.573048	2.15916e-15	0	0	0	-0.579014	1.12028e-15	0	0	-0.563333	1.88713e-14	0	0	0	-0.560712	2.06582e-14	0
X - 24608	X...24608	NA	NA	901	0.532274	0.0664945	3.67555e-15	0.508413	3.82148e-13	0	0	0	0.535995	1.47682e-14	0	0	0	0.532431	3.85933e-15	0	0	0	0.531896	3.92617e-15	0	0	0	0.509279	1.02629e-13	0	0	0	0.528016	6.43812e-15	0	0	0	0.535822	3.01756e-15	0	0	0.533771	1.15834e-14	0	0	0	0.536506	7.9176e-15	0
glutamate	glutamate	Amino Acid	Glutamate Metabolism	960	0.512613	0.0646246	5.96977e-15	0.474503	2.35188e-12	0	0	0	0.531294	3.15424e-15	0	0	0	0.510365	7.83351e-15	0	0	0	0.512081	6.48791e-15	0	0	0	0.502574	4.30332e-14	0	0	0	0.515243	4.56387e-15	0	0	0	0.512983	6.52663e-15	0	0	0.485509	3.4681e-13	0	0	0	0.527865	2.70193e-15	0
1-(1-enyl-oleoyl)-GPE (P-18:1)*	X1..1.enyl.oleoyl..GPE..P.18.1..	Lipid	Lysoplasmalogen	960	-0.559293	0.0708821	8.17535e-15	-0.561951	5.08659e-14	0	0	0	-0.538078	3.05035e-13	0	0	0	-0.557552	1.03891e-14	0	0	0	-0.557715	9.06418e-15	0	0	0	-0.587334	8.76438e-16	0	0	0	-0.554082	1.39303e-14	0	0	0	-0.562399	6.75024e-15	0	0	-0.498925	6.29272e-12	0	0	0	-0.532693	3.04449e-13	0
pyroglutamine*	pyroglutamine.	Amino Acid	Glutamate Metabolism	961	-0.506726	0.0643	8.79352e-15	-0.495151	2.30524e-13	0	0	0	-0.520448	8.19361e-15	0	0	0	-0.510503	5.2953e-15	0	0	0	-0.506949	8.88531e-15	0	0	0	-0.477846	4.2728e-13	0	0	0	-0.532486	1.2229e-17	0	0	0	-0.532717	9.35753e-17	0	0	-0.501192	5.20485e-14	0	0	0	-0.540957	3.4184e-16	0
1-stearoyl-GPC (18:0)	X1.stearoyl.GPC..18.0.	Lipid	Lysolipid	964	-0.563798	0.0716249	9.38854e-15	-0.574285	2.57058e-14	0	0	0	-0.539891	4.27201e-13	0	0	0	-0.564951	8.72606e-15	0	0	0	-0.563155	1.02079e-14	0	0	0	-0.566897	1.61214e-14	0	0	0	-0.558375	1.61322e-14	0	0	0	-0.565629	8.89969e-15	0	0	-0.538796	3.42531e-13	0	0	0	-0.493223	1.18881e-11	0
sphingosine	sphingosine	Lipid	Sphingolipid Metabolism	941	0.530819	0.0681317	1.75231e-14	0.533488	9.19116e-14	0	0	0	0.567726	1.31924e-15	0	0	0	0.529153	2.08745e-14	0	0	0	0.530815	1.81081e-14	0	0	0	0.495499	1.15015e-12	0	0	0	0.539739	5.4985e-15	0	0	0	0.534657	1.33967e-14	0	0	0.486025	4.12604e-12	0	0	0	0.564651	9.3156e-16	0
sphingomyelin (d18:1/24:1, d18:2/24:0)*	sphingomyelin..d18.1.24.1..d18.2.24.0..	Lipid	Sphingolipid Metabolism	962	-0.561792	0.0724255	2.2147e-14	-0.523316	5.27267e-12	0	0	0	-0.528849	2.01576e-12	0	0	0	-0.56001	2.75227e-14	0	0	0	-0.561367	2.37352e-14	0	0	0	-0.548804	1.79013e-13	0	0	0	-0.564058	1.86088e-14	0	0	0	-0.569666	1.02348e-14	0	0	-0.516541	4.26028e-12	0	0	0	-0.467286	1.24906e-10	0
1-(1-enyl-palmitoyl)-GPE (P-16:0)*	X1..1.enyl.palmitoyl..GPE..P.16.0..	Lipid	Lysoplasmalogen	963	-0.549434	0.0711441	2.84571e-14	-0.559404	7.56794e-14	0	0	0	-0.54122	2.81849e-13	0	0	0	-0.548017	3.44065e-14	0	0	0	-0.548667	3.10136e-14	0	0	0	-0.570103	6.86619e-15	0	0	0	-0.543731	4.96145e-14	0	0	0	-0.551228	2.71884e-14	0	0	-0.512798	2.68526e-12	0	0	0	-0.511846	2.42515e-12	0
N-acetylmethionine	N.acetylmethionine	Amino Acid	Methionine, Cysteine, SAM and Taurine Metabolism	953	-0.545554	0.0706373	2.86199e-14	-0.562179	3.86163e-14	0	0	0	-0.585552	1.47832e-15	0	0	0	-0.547082	2.44705e-14	0	0	0	-0.547264	2.25627e-14	0	0	0	-0.507442	2.0943e-12	0	0	0	-0.566956	6.0842e-16	0	0	0	-0.582238	5.2261e-17	0	0	-0.521018	9.07385e-13	0	0	0	-0.597484	1.73529e-16	0
X - 17179	X...17179	NA	NA	929	-0.539412	0.0700917	3.58613e-14	-0.53069	6.33578e-13	0	0	0	-0.587848	7.97588e-16	0	0	0	-0.538194	4.03243e-14	0	0	0	-0.539537	3.58123e-14	0	0	0	-0.493574	5.66957e-12	0	0	0	-0.548802	1.23495e-14	0	0	0	-0.555526	5.78016e-15	0	0	-0.533768	1.7632e-13	0	0	0	-0.547305	4.41087e-14	0
1-(1-enyl-palmitoyl)-2-palmitoyl-GPC (P-16:0/16:0)*	X1..1.enyl.palmitoyl..2.palmitoyl.GPC..P.16.0.16.0..	Lipid	Plasmalogen	962	-0.551392	0.0722078	5.38754e-14	-0.475707	2.31317e-10	0	0	0	-0.515756	5.72719e-12	0	0	0	-0.549384	6.7892e-14	0	0	0	-0.551318	5.61034e-14	0	0	0	-0.541467	3.15401e-13	0	0	0	-0.555153	3.77556e-14	0	0	0	-0.556607	3.4716e-14	0	0	-0.495425	2.27745e-11	0	0	0	-0.47695	6.99937e-11	0
X - 24728	X...24728	NA	NA	782	0.576538	0.0753024	5.64816e-14	0.539162	7.71941e-12	0	0	0	0.549254	2.03749e-12	0	0	0	0.57315	5.89991e-14	0	0	0	0.576376	5.95081e-14	0	0	0	0.592907	1.91434e-14	0	0	0	0.527524	9.85692e-14	0	0	0	0.52653	4.63798e-13	0	0	0.551092	1.58888e-12	0	0	0	0.539248	3.27033e-12	0
malate	malate	Energy	TCA Cycle	949	0.524933	0.069374	9.04105e-14	0.512823	1.953e-12	0	0	0	0.512581	1.25815e-12	0	0	0	0.523077	1.11735e-13	0	0	0	0.524375	9.72629e-14	0	0	0	0.523791	2.22084e-13	0	0	0	0.526458	8.17307e-14	0	0	0	0.521916	1.37217e-13	0	0	0.528	1.99395e-13	0	0	0	0.500048	2.40715e-12	0
X - 14364	X...14364	NA	NA	940	0.479629	0.0634313	9.47003e-14	0.492996	1.34892e-13	0	0	0	0.535139	3.79873e-16	0	0	0	0.480831	8.75035e-14	0	0	0	0.479981	9.0625e-14	0	0	0	0.459055	1.75467e-12	0	0	0	0.489503	1.28873e-14	0	0	0	0.490803	1.94159e-14	0	0	0.482844	2.01028e-13	0	0	0	0.50364	1.4856e-14	0
X - 24449	X...24449	NA	NA	947	-0.549038	0.0726889	9.98467e-14	-0.567071	1.18204e-13	0	0	0	-0.573101	3.92481e-14	0	0	0	-0.550749	8.67404e-14	0	0	0	-0.549104	1.00508e-13	0	0	0	-0.503692	1.14011e-11	0	0	0	-0.572197	2.10678e-15	0	0	0	-0.577474	2.09139e-15	0	0	-0.542366	5.49624e-13	0	0	0	-0.540971	5.68438e-13	0
sphingomyelin (d18:1/20:1, d18:2/20:0)*	sphingomyelin..d18.1.20.1..d18.2.20.0..	Lipid	Sphingolipid Metabolism	963	-0.532575	0.0709943	1.43024e-13	-0.529919	1.19633e-12	0	0	0	-0.503857	8.05696e-12	0	0	0	-0.53027	1.83789e-13	0	0	0	-0.531946	1.55179e-13	0	0	0	-0.528839	4.52675e-13	0	0	0	-0.53308	1.46278e-13	0	0	0	-0.540337	6.75894e-14	0	0	-0.460475	1.91574e-10	0	0	0	-0.469936	7.7898e-11	0
1-stearoyl-GPI (18:0)	X1.stearoyl.GPI..18.0.	Lipid	Lysolipid	959	-0.54839	0.0733857	1.76717e-13	-0.516686	1.75691e-11	0	0	0	-0.518606	9.93932e-12	0	0	0	-0.548938	1.75958e-13	0	0	0	-0.547851	1.90293e-13	0	0	0	-0.549706	3.27563e-13	0	0	0	-0.540298	3.37335e-13	0	0	0	-0.541666	3.61575e-13	0	0	-0.546423	6.29793e-13	0	0	0	-0.479399	1.20529e-10	0
DSGEGDFXAEGGGVR*	DSGEGDFXAEGGGVR.	Peptide	Fibrinogen Cleavage Peptide	926	-0.506138	0.0681729	2.56782e-13	-0.514608	7.00349e-13	0	0	0	-0.538183	3.57355e-14	0	0	0	-0.506284	2.60869e-13	0	0	0	-0.506415	2.48405e-13	0	0	0	-0.476578	8.80242e-12	0	0	0	-0.514154	1.06387e-13	0	0	0	-0.516634	8.93855e-14	0	0	-0.501924	1.02372e-12	0	0	0	-0.522128	1.29344e-13	0
sphingomyelin (d18:2/23:0, d18:1/23:1, d17:1/24:1)*	sphingomyelin..d18.2.23.0..d18.1.23.1..d17.1.24.1..	Lipid	Sphingolipid Metabolism	960	-0.535042	0.072333	3.03624e-13	-0.510702	1.55748e-11	0	0	0	-0.499529	2.74903e-11	0	0	0	-0.532134	4.04783e-13	0	0	0	-0.534049	3.30461e-13	0	0	0	-0.540347	3.76735e-13	0	0	0	-0.53405	3.59572e-13	0	0	0	-0.543456	1.3769e-13	0	0	-0.461986	3.68578e-10	0	0	0	-0.442146	1.07022e-09	0
sphingomyelin (d18:2/16:0, d18:1/16:1)*	sphingomyelin..d18.2.16.0..d18.1.16.1..	Lipid	Sphingolipid Metabolism	962	-0.527374	0.0715515	3.65697e-13	-0.481344	1.21692e-10	0	0	0	-0.501898	1.40879e-11	0	0	0	-0.5257	4.46644e-13	0	0	0	-0.526834	3.92252e-13	0	0	0	-0.515264	2.44016e-12	0	0	0	-0.528113	3.63017e-13	0	0	0	-0.53575	1.59123e-13	0	0	-0.466725	1.89622e-10	0	0	0	-0.434636	1.29963e-09	0
aspartate	aspartate	Amino Acid	Alanine and Aspartate Metabolism	960	0.485002	0.0658259	3.731e-13	0.478616	4.33387e-12	0	0	0	0.513557	6.37837e-14	0	0	0	0.483364	4.59056e-13	0	0	0	0.48502	3.84216e-13	0	0	0	0.475184	2.18206e-12	0	0	0	0.488598	2.56645e-13	0	0	0	0.482186	5.63263e-13	0	0	0.467511	6.06399e-12	0	0	0	0.501237	1.57879e-13	0
oxalate (ethanedioate)	oxalate..ethanedioate.	Cofactors and Vitamins	Ascorbate and Aldarate Metabolism	962	-0.482012	0.0656399	4.43704e-13	-0.483637	2.42796e-12	0	0	0	-0.478568	2.58667e-12	0	0	0	-0.480528	5.44007e-13	0	0	0	-0.482317	4.41377e-13	0	0	0	-0.483668	7.87013e-13	0	0	0	-0.474598	8.64073e-13	0	0	0	-0.472415	1.19227e-12	0	0	-0.459088	1.21372e-11	0	0	0	-0.502941	1.14826e-13	0
3-aminoisobutyrate	X3.aminoisobutyrate	Nucleotide	Pyrimidine Metabolism, Thymine containing	943	-0.529155	0.0730801	9.2552e-13	-0.538137	2.24263e-12	0	0	0	-0.527147	3.95842e-12	0	0	0	-0.534292	5.42825e-13	0	0	0	-0.528257	1.01097e-12	0	0	0	-0.504107	1.68016e-11	0	0	0	-0.55073	2.34463e-14	0	0	0	-0.55832	1.65322e-14	0	0	-0.522571	4.62532e-12	0	0	0	-0.559829	1.10015e-13	0
1-palmitoyl-2-arachidonoyl-GPE (16:0/20:4)*	X1.palmitoyl.2.arachidonoyl.GPE..16.0.20.4..	Lipid	Phospholipid Metabolism	962	0.504739	0.0698697	1.02611e-12	0.453547	5.03339e-10	0	0	0	0.470035	8.50637e-11	0	0	0	0.501999	1.3531e-12	0	0	0	0.504713	1.05964e-12	0	0	0	0.496466	4.71635e-12	0	0	0	0.501673	1.43972e-12	0	0	0	0.493958	2.803e-12	0	0	0.443298	5.42153e-10	0	0	0	0.492743	7.51493e-12	0
X - 24061	X...24061	NA	NA	961	-0.516374	0.0714799	1.02643e-12	-0.449593	1.48756e-09	0	0	0	-0.488113	4.6103e-11	0	0	0	-0.515911	1.12608e-12	0	0	0	-0.516756	1.01368e-12	0	0	0	-0.492286	1.83251e-11	0	0	0	-0.520413	7.07388e-13	0	0	0	-0.522671	5.95835e-13	0	0	-0.484588	4.74292e-11	0	0	0	-0.455495	3.7572e-10	0
X - 12101	X...12101	NA	NA	843	0.538783	0.0747471	1.26135e-12	0.5137	6.23107e-11	0	0	0	0.502055	9.54851e-11	0	0	0	0.532694	1.97308e-12	0	0	0	0.539516	1.16542e-12	0	0	0	0.550084	8.70701e-13	0	0	0	0.532575	9.86574e-13	0	0	0	0.516462	4.01422e-12	0	0	0.51631	2.37752e-11	0	0	0	0.494242	9.88207e-11	0
S-adenosylhomocysteine (SAH)	S.adenosylhomocysteine..SAH.	Amino Acid	Methionine, Cysteine, SAM and Taurine Metabolism	872	0.501869	0.0698154	1.40772e-12	0.492699	1.7898e-11	0	0	0	0.504146	3.23535e-12	0	0	0	0.492084	3.5593e-12	0	0	0	0.50204	1.40606e-12	0	0	0	0.489455	8.3705e-12	0	0	0	0.477044	1.82552e-12	0	0	0	0.46723	8.41093e-12	0	0	0.481296	2.50223e-11	0	0	0	0.462796	1.2634e-10	0
1-palmitoyl-2-oleoyl-GPE (16:0/18:1)	X1.palmitoyl.2.oleoyl.GPE..16.0.18.1.	Lipid	Phospholipid Metabolism	962	0.517692	0.0722036	1.49492e-12	0.46495	6.84345e-10	0	0	0	0.483692	1.01181e-10	0	0	0	0.516608	1.7166e-12	0	0	0	0.517887	1.50885e-12	0	0	0	0.502764	1.18825e-11	0	0	0	0.515696	1.91601e-12	0	0	0	0.508398	3.67365e-12	0	0	0.455219	6.70358e-10	0	0	0	0.517589	3.55743e-12	0
sphingomyelin (d18:1/22:1, d18:2/22:0, d16:1/24:1)*	sphingomyelin..d18.1.22.1..d18.2.22.0..d16.1.24.1..	Lipid	Sphingolipid Metabolism	958	-0.512963	0.0721095	2.21069e-12	-0.473956	3.10022e-10	0	0	0	-0.471019	2.74984e-10	0	0	0	-0.509977	2.94484e-12	0	0	0	-0.51209	2.38865e-12	0	0	0	-0.51893	2.50287e-12	0	0	0	-0.511564	2.69248e-12	0	0	0	-0.519795	1.23069e-12	0	0	-0.450274	1.01034e-09	0	0	0	-0.411684	9.86456e-09	0
X - 24749	X...24749	NA	NA	869	-0.532685	0.0748032	2.24399e-12	-0.52212	2.70475e-11	0	0	0	-0.517138	2.93358e-11	0	0	0	-0.529441	3.12569e-12	0	0	0	-0.532674	2.31478e-12	0	0	0	-0.539633	2.40096e-12	0	0	0	-0.528156	3.27126e-12	0	0	0	-0.535396	1.99215e-12	0	0	-0.500971	8.88158e-11	0	0	0	-0.49733	8.83107e-11	0
pipecolate	pipecolate	Amino Acid	Lysine Metabolism	944	0.518619	0.0729876	2.35971e-12	0.503234	5.11417e-11	0	0	0	0.45871	1.08679e-09	0	0	0	0.517501	2.77392e-12	0	0	0	0.518213	2.50712e-12	0	0	0	0.528302	1.81783e-12	0	0	0	0.512404	3.77265e-12	0	0	0	0.504453	6.46628e-12	0	0	0.500523	3.42211e-11	0	0	0	0.494712	4.16356e-11	0
X - 11381	X...11381	NA	NA	961	-0.512646	0.0722372	2.4794e-12	-0.50216	3.3524e-11	0	0	0	-0.49757	3.3186e-11	0	0	0	-0.510495	3.10438e-12	0	0	0	-0.511707	2.6945e-12	0	0	0	-0.470469	1.68901e-10	0	0	0	-0.513783	2.37049e-12	0	0	0	-0.5143	2.37978e-12	0	0	-0.496321	2.81937e-11	0	0	0	-0.502985	1.40094e-11	0
1-palmitoyl-2-linoleoyl-glycerol (16:0/18:2)*	X1.palmitoyl.2.linoleoyl.glycerol..16.0.18.2..	Lipid	Diacylglycerol	963	0.490826	0.0694614	3.05305e-12	0.492311	1.39682e-11	0	0	0	0.491777	9.85376e-12	0	0	0	0.48651	4.38321e-12	0	0	0	0.49044	3.24497e-12	0	0	0	0.474167	2.76382e-11	0	0	0	0.493815	2.36689e-12	0	0	0	0.49106	3.35209e-12	0	0	0.400539	1.08013e-08	0	0	0	0.539161	3.76475e-14	0
3-hydroxymyristate	X3.hydroxymyristate	Lipid	Fatty Acid, Monohydroxy	918	0.521155	0.0740997	3.94343e-12	0.534659	7.32554e-12	0	0	0	0.535595	4.53085e-12	0	0	0	0.523182	3.43028e-12	0	0	0	0.518942	4.63348e-12	0	0	0	0.518323	9.75705e-12	0	0	0	0.534305	8.57909e-13	0	0	0	0.526619	2.57937e-12	0	0	0.526446	7.26402e-12	0	0	0	0.521625	8.91731e-12	0
3-hydroxylaurate	X3.hydroxylaurate	Lipid	Fatty Acid, Monohydroxy	954	0.508469	0.0731283	6.62293e-12	0.530356	4.81316e-12	0	0	0	0.515596	1.19184e-11	0	0	0	0.510178	5.86028e-12	0	0	0	0.5075	7.20243e-12	0	0	0	0.50616	1.60801e-11	0	0	0	0.519913	1.74614e-12	0	0	0	0.517826	2.84932e-12	0	0	0.512034	1.24982e-11	0	0	0	0.505308	1.85602e-11	0
palmitoyl sphingomyelin (d18:1/16:0)	palmitoyl.sphingomyelin..d18.1.16.0.	Lipid	Sphingolipid Metabolism	961	-0.507736	0.0733804	8.28485e-12	-0.460599	1.86169e-09	0	0	0	-0.469272	6.2667e-10	0	0	0	-0.506445	9.65815e-12	0	0	0	-0.50799	8.30884e-12	0	0	0	-0.49235	6.11891e-11	0	0	0	-0.510648	6.58997e-12	0	0	0	-0.517816	3.21628e-12	0	0	-0.478169	2.54053e-10	0	0	0	-0.413064	1.69151e-08	0
palmitoyl dihydrosphingomyelin (d18:0/16:0)*	palmitoyl.dihydrosphingomyelin..d18.0.16.0..	Lipid	Sphingolipid Metabolism	961	-0.495001	0.0721903	1.25781e-11	-0.444397	3.48984e-09	0	0	0	-0.459565	7.48237e-10	0	0	0	-0.492734	1.5801e-11	0	0	0	-0.494469	1.33973e-11	0	0	0	-0.495406	2.37316e-11	0	0	0	-0.494598	1.38848e-11	0	0	0	-0.496957	1.16951e-11	0	0	-0.452335	1.06461e-09	0	0	0	-0.383428	9.00983e-08	0
3-hydroxybutyrate (BHBA)	X3.hydroxybutyrate..BHBA.	Lipid	Ketone Bodies	953	0.497919	0.0728621	1.47451e-11	0.492503	1.16419e-10	0	0	0	0.494863	6.28028e-11	0	0	0	0.499202	1.36535e-11	0	0	0	0.495599	1.77784e-11	0	0	0	0.488104	6.72148e-11	0	0	0	0.501511	1.07323e-11	0	0	0	0.496559	1.83284e-11	0	0	0.498334	3.74115e-11	0	0	0	0.501516	2.29879e-11	0
glycerophosphorylcholine (GPC)	glycerophosphorylcholine..GPC.	Lipid	Phospholipid Metabolism	957	-0.500047	0.0739872	2.41904e-11	-0.511535	4.30424e-11	0	0	0	-0.487717	2.16016e-10	0	0	0	-0.498544	2.87335e-11	0	0	0	-0.500038	2.49043e-11	0	0	0	-0.49152	9.45934e-11	0	0	0	-0.492696	4.24474e-11	0	0	0	-0.486674	7.10706e-11	0	0	-0.469294	7.06373e-10	0	0	0	-0.443718	3.86825e-09	0
dihydroorotate	dihydroorotate	Nucleotide	Pyrimidine Metabolism, Orotate containing	847	-0.48422	0.0720349	3.2913e-11	-0.480755	2.22118e-10	0	0	0	-0.513496	9.77376e-12	0	0	0	-0.485311	2.88595e-11	0	0	0	-0.484299	3.35923e-11	0	0	0	-0.443848	1.64814e-09	0	0	0	-0.500457	6.51171e-12	0	0	0	-0.514541	1.53759e-12	0	0	-0.501151	1.6134e-11	0	0	0	-0.482928	9.78333e-11	0
X - 14314	X...14314	NA	NA	926	0.444114	0.0662127	3.44433e-11	0.431991	4.54219e-10	0	0	0	0.472387	6.04848e-12	0	0	0	0.442919	3.83947e-11	0	0	0	0.444521	3.22369e-11	0	0	0	0.41831	6.07533e-10	0	0	0	0.44952	1.93858e-11	0	0	0	0.443827	4.01474e-11	0	0	0.449306	4.58045e-11	0	0	0	0.443222	8.54552e-11	0
X - 14095	X...14095	NA	NA	917	0.413956	0.0623519	5.39981e-11	0.40846	3.69576e-10	0	0	0	0.439732	1.06822e-11	0	0	0	0.4119	6.96861e-11	0	0	0	0.415297	4.11618e-11	0	0	0	0.379657	2.28622e-09	0	0	0	0.421614	2.14897e-11	0	0	0	0.418612	3.68724e-11	0	0	0.426828	3.40269e-11	0	0	0	0.425923	2.98619e-11	0
erythronate*	erythronate.	Carbohydrate	Aminosugar Metabolism	946	0.454102	0.0689073	7.29229e-11	0.438633	1.20605e-09	0	0	0	0.412912	6.61191e-09	0	0	0	0.452803	8.54888e-11	0	0	0	0.453425	7.72735e-11	0	0	0	0.479295	1.19913e-11	0	0	0	0.432708	6.08009e-11	0	0	0	0.418186	3.98082e-10	0	0	0.436515	7.65786e-10	0	0	0	0.419036	2.87e-09	0
X - 24049	X...24049	NA	NA	777	-0.524254	0.0798199	9.33391e-11	-0.457561	3.21907e-08	0	0	0	-0.488924	4.25052e-09	0	0	0	-0.517991	1.24794e-10	0	0	0	-0.521068	1.20473e-10	0	0	0	-0.515879	3.06412e-10	0	0	0	-0.528027	7.02048e-11	0	0	0	-0.522716	1.23115e-10	0	0	-0.421908	1.63523e-07	0	0	0	-0.467572	9.92517e-09	0
1-arachidonoyl-GPC (20:4n6)*	X1.arachidonoyl.GPC..20.4n6..	Lipid	Lysolipid	964	-0.484602	0.0744889	1.24061e-10	-0.556687	8.06465e-13	0	0	0	-0.494134	1.64737e-10	0	0	0	-0.484931	1.25456e-10	0	0	0	-0.483697	1.3405e-10	0	0	0	-0.497849	7.24912e-11	0	0	0	-0.480071	1.8402e-10	0	0	0	-0.48839	9.77594e-11	0	0	-0.454772	2.9216e-09	0	0	0	-0.458978	1.90101e-09	0
1-palmitoyl-GPI (16:0)*	X1.palmitoyl.GPI..16.0..	Lipid	Lysolipid	958	-0.481077	0.0739531	1.24845e-10	-0.418516	4.99514e-08	0	0	0	-0.452669	3.32744e-09	0	0	0	-0.480205	1.39354e-10	0	0	0	-0.480801	1.31024e-10	0	0	0	-0.47898	2.64584e-10	0	0	0	-0.473274	2.22772e-10	0	0	0	-0.470947	2.93144e-10	0	0	-0.483417	2.35877e-10	0	0	0	-0.408787	4.38705e-08	0
gamma-glutamylglutamate	gamma.glutamylglutamate	Peptide	Gamma-glutamyl Amino Acid	958	0.413088	0.0639627	1.68161e-10	0.363504	4.71998e-08	0	0	0	0.422923	1.78727e-10	0	0	0	0.411233	2.03413e-10	0	0	0	0.413021	1.73441e-10	0	0	0	0.413668	2.80026e-10	0	0	0	0.409901	2.3585e-10	0	0	0	0.408025	2.945e-10	0	0	0.390505	2.99689e-09	0	0	0	0.430312	5.90304e-11	0
gamma-glutamylisoleucine*	gamma.glutamylisoleucine.	Peptide	Gamma-glutamyl Amino Acid	959	0.438131	0.0679238	1.76742e-10	0.401205	1.43228e-08	0	0	0	0.42398	1.67415e-09	0	0	0	0.433733	2.52178e-10	0	0	0	0.437154	1.92501e-10	0	0	0	0.455024	6.32231e-11	0	0	0	0.422334	4.27923e-10	0	0	0	0.409541	1.11424e-09	0	0	0.391874	1.69856e-08	0	0	0	0.424474	1.16782e-09	0
1-linoleoyl-GPI (18:2)*	X1.linoleoyl.GPI..18.2..	Lipid	Lysolipid	962	-0.469212	0.0727629	1.78528e-10	-0.394617	1.6633e-07	0	0	0	-0.445931	3.24205e-09	0	0	0	-0.468869	1.91038e-10	0	0	0	-0.469643	1.75203e-10	0	0	0	-0.460936	6.38797e-10	0	0	0	-0.461369	3.1741e-10	0	0	0	-0.460979	3.71279e-10	0	0	-0.458743	9.56392e-10	0	0	0	-0.398845	5.90794e-08	0
sphingomyelin (d18:1/15:0, d16:1/17:0)*	sphingomyelin..d18.1.15.0..d16.1.17.0..	Lipid	Sphingolipid Metabolism	959	-0.475446	0.0740167	2.09348e-10	-0.426351	3.18083e-08	0	0	0	-0.430708	1.70452e-08	0	0	0	-0.472185	2.71435e-10	0	0	0	-0.474523	2.27712e-10	0	0	0	-0.46327	9.98096e-10	0	0	0	-0.472951	2.69712e-10	0	0	0	-0.48398	1.03599e-10	0	0	-0.423724	2.28345e-08	0	0	0	-0.376068	3.56382e-07	0
N-acetyltyrosine	N.acetyltyrosine	Amino Acid	Phenylalanine and Tyrosine Metabolism	918	-0.47918	0.0750562	2.73045e-10	-0.471985	1.94853e-09	0	0	0	-0.494856	2.4579e-10	0	0	0	-0.480205	2.59253e-10	0	0	0	-0.479383	2.74395e-10	0	0	0	-0.45741	2.49068e-09	0	0	0	-0.504873	1.48965e-11	0	0	0	-0.517183	3.98501e-12	0	0	-0.503186	7.53851e-11	0	0	0	-0.501046	9.53286e-11	0
sphinganine	sphinganine	Lipid	Sphingolipid Metabolism	925	0.436799	0.0688405	3.47534e-10	0.456067	2.22772e-10	0	0	0	0.473554	3.03795e-11	0	0	0	0.436799	3.5602e-10	0	0	0	0.436716	3.57166e-10	0	0	0	0.40307	8.64717e-09	0	0	0	0.445112	1.52611e-10	0	0	0	0.443025	2.16525e-10	0	0	0.416692	4.27401e-09	0	0	0	0.482967	7.23627e-12	0
1-stearoyl-2-arachidonoyl-GPE (18:0/20:4)	X1.stearoyl.2.arachidonoyl.GPE..18.0.20.4.	Lipid	Phospholipid Metabolism	962	0.444354	0.0708211	5.30175e-10	0.374727	3.37124e-07	0	0	0	0.406895	2.664e-08	0	0	0	0.442487	6.31138e-10	0	0	0	0.44434	5.42999e-10	0	0	0	0.427332	3.73169e-09	0	0	0	0.443328	6.09788e-10	0	0	0	0.43379	1.27263e-09	0	0	0.382651	1.15599e-07	0	0	0	0.449631	6.49718e-10	0
glycerophosphoinositol*	glycerophosphoinositol.	Lipid	Phospholipid Metabolism	909	-0.472064	0.0760116	8.03052e-10	-0.480712	1.47982e-09	0	0	0	-0.486984	6.08777e-10	0	0	0	-0.468609	1.05676e-09	0	0	0	-0.472263	8.09573e-10	0	0	0	-0.460953	3.07451e-09	0	0	0	-0.46658	1.17304e-09	0	0	0	-0.459475	1.99614e-09	0	0	-0.456188	5.40595e-09	0	0	0	-0.438738	1.62183e-08	0
X - 16134	X...16134	NA	NA	873	-0.444312	0.0717036	8.88787e-10	-0.477645	1.98768e-10	0	0	0	-0.487269	6.54496e-11	0	0	0	-0.444451	9.00118e-10	0	0	0	-0.444564	8.78337e-10	0	0	0	-0.425358	6.65546e-09	0	0	0	-0.445834	8.70035e-10	0	0	0	-0.450157	6.42136e-10	0	0	-0.428455	6.71518e-09	0	0	0	-0.445089	2.00057e-09	0
3-hydroxy-3-methylglutarate	X3.hydroxy.3.methylglutarate	Lipid	Mevalonate Metabolism	951	0.436373	0.0705027	8.96468e-10	0.356282	9.95307e-07	0	0	0	0.403572	2.8568e-08	0	0	0	0.430008	1.52553e-09	0	0	0	0.435453	9.6173e-10	0	0	0	0.434722	1.75178e-09	0	0	0	0.414421	1.52958e-09	0	0	0	0.401267	4.72e-09	0	0	0.433701	2.22524e-09	0	0	0	0.383186	9.21684e-08	0
1-oleoyl-GPC (18:1)	X1.oleoyl.GPC..18.1.	Lipid	Lysolipid	963	-0.450756	0.0729575	9.54669e-10	-0.455369	2.4684e-09	0	0	0	-0.433375	9.68105e-09	0	0	0	-0.450117	1.03729e-09	0	0	0	-0.449464	1.03522e-09	0	0	0	-0.439359	4.07256e-09	0	0	0	-0.447798	1.2639e-09	0	0	0	-0.451127	1.01454e-09	0	0	-0.421104	1.92215e-08	0	0	0	-0.397314	8.62344e-08	0
gamma-glutamylglutamine	gamma.glutamylglutamine	Peptide	Gamma-glutamyl Amino Acid	962	-0.436695	0.0707173	9.73305e-10	-0.465533	3.17103e-10	0	0	0	-0.467286	1.8083e-10	0	0	0	-0.434368	1.20312e-09	0	0	0	-0.437115	9.5517e-10	0	0	0	-0.418249	7.3608e-09	0	0	0	-0.437435	9.58652e-10	0	0	0	-0.438353	9.2054e-10	0	0	-0.433248	2.7474e-09	0	0	0	-0.416457	9.33627e-09	0
gamma-glutamylvaline	gamma.glutamylvaline	Peptide	Gamma-glutamyl Amino Acid	954	0.427039	0.0692875	1.04995e-09	0.398725	3.6114e-08	0	0	0	0.421531	4.53721e-09	0	0	0	0.425337	1.23768e-09	0	0	0	0.426037	1.07616e-09	0	0	0	0.454308	1.59858e-10	0	0	0	0.421231	1.72632e-09	0	0	0	0.416694	2.56601e-09	0	0	0.407921	9.81324e-09	0	0	0	0.430756	1.45618e-09	0
1-palmitoleoyl-2-linoleoyl-GPC (16:1/18:2)*	X1.palmitoleoyl.2.linoleoyl.GPC..16.1.18.2..	Lipid	Phospholipid Metabolism	954	-0.441849	0.0720372	1.25681e-09	-0.380041	3.76507e-07	0	0	0	-0.414107	2.80129e-08	0	0	0	-0.439201	1.54806e-09	0	0	0	-0.440136	1.39155e-09	0	0	0	-0.431051	5.00089e-09	0	0	0	-0.438425	1.72557e-09	0	0	0	-0.439995	1.62234e-09	0	0	-0.384051	1.74597e-07	0	0	0	-0.383386	1.51364e-07	0
pro-hydroxy-pro	pro.hydroxy.pro	Amino Acid	Urea cycle; Arginine and Proline Metabolism	952	-0.446008	0.0730584	1.4967e-09	-0.459989	1.69596e-09	0	0	0	-0.435057	8.41136e-09	0	0	0	-0.448021	1.32596e-09	0	0	0	-0.445591	1.57717e-09	0	0	0	-0.411177	3.25617e-08	0	0	0	-0.467925	6.09978e-11	0	0	0	-0.477768	2.52623e-11	0	0	-0.433768	7.5316e-09	0	0	0	-0.486791	8.09199e-11	0
X - 16580	X...16580	NA	NA	952	0.43909	0.0722415	1.7577e-09	0.416644	3.3804e-08	0	0	0	0.408898	4.371e-08	0	0	0	0.438722	1.88025e-09	0	0	0	0.438567	1.85445e-09	0	0	0	0.456657	6.92482e-10	0	0	0	0.424554	3.93971e-09	0	0	0	0.415549	7.75599e-09	0	0	0.421683	1.39622e-08	0	0	0	0.407497	3.44528e-08	0
3-methoxytyrosine	X3.methoxytyrosine	Amino Acid	Phenylalanine and Tyrosine Metabolism	947	-0.456136	0.0750728	1.78413e-09	-0.488529	4.80061e-10	0	0	0	-0.476487	8.77029e-10	0	0	0	-0.457757	1.5302e-09	0	0	0	-0.456768	1.71562e-09	0	0	0	-0.412625	6.62996e-08	0	0	0	-0.468792	4.14984e-10	0	0	0	-0.47121	3.91649e-10	0	0	-0.463136	2.08099e-09	0	0	0	-0.483544	3.35446e-10	0
X - 17167	X...17167	NA	NA	874	-0.430395	0.0708325	1.83497e-09	-0.457711	6.8973e-10	0	0	0	-0.470928	1.68573e-10	0	0	0	-0.430504	1.85712e-09	0	0	0	-0.430471	1.85791e-09	0	0	0	-0.408447	1.67365e-08	0	0	0	-0.429873	2.14916e-09	0	0	0	-0.43106	2.10489e-09	0	0	-0.420597	8.38984e-09	0	0	0	-0.434439	3.05952e-09	0
glycylvaline	glycylvaline	Peptide	Dipeptide	950	0.405988	0.0669797	1.94455e-09	0.42643	1.19827e-09	0	0	0	0.443298	1.66534e-10	0	0	0	0.405055	2.18916e-09	0	0	0	0.406962	1.77491e-09	0	0	0	0.393544	9.56837e-09	0	0	0	0.407105	1.85735e-09	0	0	0	0.403912	2.57791e-09	0	0	0.396758	8.70053e-09	0	0	0	0.420905	9.72806e-10	0
X - 21628	X...21628	NA	NA	933	-0.418171	0.0691016	2.07559e-09	-0.436096	1.54352e-09	0	0	0	-0.480606	1.46428e-11	0	0	0	-0.418631	1.99119e-09	0	0	0	-0.41858	1.95422e-09	0	0	0	-0.382483	5.35607e-08	0	0	0	-0.42703	8.79755e-10	0	0	0	-0.4313	6.29622e-10	0	0	-0.427935	1.80566e-09	0	0	0	-0.418731	3.87991e-09	0
X - 16123	X...16123	NA	NA	877	-0.441287	0.0733848	2.66503e-09	-0.470098	9.31267e-10	0	0	0	-0.47111	6.74345e-10	0	0	0	-0.441275	2.73621e-09	0	0	0	-0.44118	2.74739e-09	0	0	0	-0.404294	6.20232e-08	0	0	0	-0.449325	1.46732e-09	0	0	0	-0.463539	3.64797e-10	0	0	-0.430946	1.22269e-08	0	0	0	-0.448637	3.10456e-09	0
X - 17335	X...17335	NA	NA	896	0.450707	0.075236	3.02558e-09	0.461257	4.25334e-09	0	0	0	0.430673	3.12633e-08	0	0	0	0.452129	2.78218e-09	0	0	0	0.450002	3.21267e-09	0	0	0	0.457999	2.78994e-09	0	0	0	0.447194	3.96699e-09	0	0	0	0.441369	6.18242e-09	0	0	0.449577	6.1408e-09	0	0	0	0.443506	9.6752e-09	0
glycerophosphoethanolamine	glycerophosphoethanolamine	Lipid	Phospholipid Metabolism	957	-0.442795	0.0741623	3.32748e-09	-0.467331	1.72769e-09	0	0	0	-0.443912	7.87442e-09	0	0	0	-0.44101	3.89021e-09	0	0	0	-0.441868	3.58442e-09	0	0	0	-0.443723	5.11227e-09	0	0	0	-0.435495	5.58157e-09	0	0	0	-0.434205	6.69837e-09	0	0	-0.41469	5.22593e-08	0	0	0	-0.396894	1.53112e-07	0
1-palmitoleoyl-GPC (16:1)*	X1.palmitoleoyl.GPC..16.1..	Lipid	Lysolipid	961	-0.428209	0.072129	4.0579e-09	-0.427631	1.42601e-08	0	0	0	-0.411544	3.52075e-08	0	0	0	-0.427197	4.51259e-09	0	0	0	-0.42697	4.41142e-09	0	0	0	-0.413167	2.13587e-08	0	0	0	-0.424274	5.70246e-09	0	0	0	-0.425458	5.49212e-09	0	0	-0.412671	2.67921e-08	0	0	0	-0.400615	5.75411e-08	0
phenylalanylglycine	phenylalanylglycine	Peptide	Dipeptide	792	-0.470374	0.0790869	4.08137e-09	-0.472723	1.10677e-08	0	0	0	-0.493921	2.04235e-09	0	0	0	-0.464805	6.1728e-09	0	0	0	-0.469719	4.35488e-09	0	0	0	-0.466381	7.71809e-09	0	0	0	-0.457354	1.10733e-08	0	0	0	-0.472129	4.39155e-09	0	0	-0.451678	2.91272e-08	0	0	0	-0.462968	1.51959e-08	0
mannitol/sorbitol	mannitol.sorbitol	Carbohydrate	Fructose, Mannose and Galactose Metabolism	942	0.424015	0.0714753	4.19125e-09	0.372313	5.20436e-07	0	0	0	0.412941	2.28272e-08	0	0	0	0.419378	5.95206e-09	0	0	0	0.424055	4.26461e-09	0	0	0	0.433142	3.33348e-09	0	0	0	0.408494	8.96633e-09	0	0	0	0.397381	2.13042e-08	0	0	0.418926	1.16493e-08	0	0	0	0.416665	1.33486e-08	0
choline phosphate	choline.phosphate	Lipid	Phospholipid Metabolism	918	-0.429386	0.073145	6.07216e-09	-0.416482	5.28932e-08	0	0	0	-0.415452	4.05205e-08	0	0	0	-0.431518	5.30421e-09	0	0	0	-0.429383	6.18881e-09	0	0	0	-0.440558	4.19688e-09	0	0	0	-0.424968	8.58331e-09	0	0	0	-0.422284	1.09004e-08	0	0	-0.420745	2.31107e-08	0	0	0	-0.418546	2.55184e-08	0
sphingomyelin (d18:1/18:1, d18:2/18:0)	sphingomyelin..d18.1.18.1..d18.2.18.0.	Lipid	Sphingolipid Metabolism	962	-0.409283	0.0697999	6.21922e-09	-0.416409	1.15403e-08	0	0	0	-0.379939	1.35712e-07	0	0	0	-0.407304	7.44734e-09	0	0	0	-0.408869	6.54308e-09	0	0	0	-0.403029	1.68101e-08	0	0	0	-0.408272	7.07218e-09	0	0	0	-0.412637	5.05334e-09	0	0	-0.362505	3.76257e-07	0	0	0	-0.346341	9.50994e-07	0
isovalerate	isovalerate	Amino Acid	Leucine, Isoleucine and Valine Metabolism	959	0.430127	0.0733627	6.24842e-09	0.454174	3.27065e-09	0	0	0	0.441754	6.18128e-09	0	0	0	0.434755	4.13772e-09	0	0	0	0.429711	6.55703e-09	0	0	0	0.436285	6.41881e-09	0	0	0	0.433584	4.8829e-09	0	0	0	0.425826	9.46498e-09	0	0	0.403081	8.67743e-08	0	0	0	0.437592	6.27005e-09	0
X - 12206	X...12206	NA	NA	948	0.401704	0.0689797	7.88504e-09	0.405226	1.89388e-08	0	0	0	0.403654	1.56065e-08	0	0	0	0.399681	9.7734e-09	0	0	0	0.400811	8.49176e-09	0	0	0	0.421296	2.35245e-09	0	0	0	0.378665	1.08829e-08	0	0	0	0.368422	4.13984e-08	0	0	0.39061	3.67859e-08	0	0	0	0.381623	6.75286e-08	0
S-methylcysteine	S.methylcysteine	Amino Acid	Methionine, Cysteine, SAM and Taurine Metabolism	954	-0.426243	0.0736686	9.77226e-09	-0.44532	7.3921e-09	0	0	0	-0.425951	2.38705e-08	0	0	0	-0.429769	7.40678e-09	0	0	0	-0.424847	1.06785e-08	0	0	0	-0.419332	2.58651e-08	0	0	0	-0.432985	5.33776e-09	0	0	0	-0.440242	2.89118e-09	0	0	-0.427983	1.74067e-08	0	0	0	-0.448374	2.90758e-09	0
bilirubin (E,Z or Z,E)*	bilirubin..E.Z.or.Z.E..	Cofactors and Vitamins	Hemoglobin and Porphyrin Metabolism	867	-0.415109	0.0718894	1.07627e-08	-0.417376	3.141e-08	0	0	0	-0.419698	1.95733e-08	0	0	0	-0.411207	1.45194e-08	0	0	0	-0.415005	1.10805e-08	0	0	0	-0.425512	7.47744e-09	0	0	0	-0.414055	1.21136e-08	0	0	0	-0.414495	1.21612e-08	0	0	-0.420756	1.30374e-08	0	0	0	-0.409493	2.96094e-08	0
3-hydroxystearate	X3.hydroxystearate	Lipid	Fatty Acid, Monohydroxy	785	0.47394	0.0821005	1.12334e-08	0.485219	1.73453e-08	0	0	0	0.463782	6.0318e-08	0	0	0	0.472986	1.23033e-08	0	0	0	0.476209	9.40198e-09	0	0	0	0.482128	9.60471e-09	0	0	0	0.478344	8.29869e-09	0	0	0	0.475662	1.09445e-08	0	0	0.465062	3.90722e-08	0	0	0	0.468911	2.66359e-08	0
adenine	adenine	Nucleotide	Purine Metabolism, Adenine containing	929	-0.410389	0.0716399	1.36816e-08	-0.468441	3.79034e-10	0	0	0	-0.467948	2.44912e-10	0	0	0	-0.412787	1.1144e-08	0	0	0	-0.41095	1.26286e-08	0	0	0	-0.3906	9.43405e-08	0	0	0	-0.425193	2.67604e-09	0	0	0	-0.432617	1.57972e-09	0	0	-0.426549	7.11477e-09	0	0	0	-0.43644	2.84749e-09	0
1-palmitoylglycerol (16:0)	X1.palmitoylglycerol..16.0.	Lipid	Monoacylglycerol	950	0.412174	0.0723112	1.59829e-08	0.418015	3.17379e-08	0	0	0	0.411036	4.1839e-08	0	0	0	0.412029	1.65893e-08	0	0	0	0.412958	1.51964e-08	0	0	0	0.395618	8.34885e-08	0	0	0	0.414637	1.37136e-08	0	0	0	0.408544	2.28441e-08	0	0	0.34291	2.96809e-06	0	0	0	0.430655	6.58021e-09	0
X - 24286	X...24286	NA	NA	920	0.41261	0.072604	1.77569e-08	0.402495	1.17614e-07	0	0	0	0.409607	4.92365e-08	0	0	0	0.409668	2.11355e-08	0	0	0	0.413649	1.64444e-08	0	0	0	0.398677	8.57555e-08	0	0	0	0.414634	1.54771e-08	0	0	0	0.414357	1.65613e-08	0	0	0.315474	1.36422e-05	0	0	0	0.448137	1.76875e-09	0
X - 14384	X...14384	NA	NA	927	-0.414188	0.073185	2.02366e-08	-0.413158	6.14559e-08	0	0	0	-0.426532	1.73809e-08	0	0	0	-0.409158	2.85529e-08	0	0	0	-0.413835	2.09704e-08	0	0	0	-0.396631	1.11062e-07	0	0	0	-0.4083	3.22413e-08	0	0	0	-0.407484	3.70218e-08	0	0	-0.402136	8.72814e-08	0	0	0	-0.42465	1.65501e-08	0
1-(1-enyl-stearoyl)-GPE (P-18:0)*	X1..1.enyl.stearoyl..GPE..P.18.0..	Lipid	Lysoplasmalogen	947	-0.405496	0.0720951	2.44913e-08	-0.409758	5.0599e-08	0	0	0	-0.384329	2.48844e-07	0	0	0	-0.400738	3.45065e-08	0	0	0	-0.402693	2.77231e-08	0	0	0	-0.436614	2.86413e-09	0	0	0	-0.396565	4.35132e-08	0	0	0	-0.402025	3.45034e-08	0	0	-0.350348	1.81131e-06	0	0	0	-0.376551	3.25922e-07	0
X - 21365	X...21365	NA	NA	956	0.405692	0.0721835	2.50079e-08	0.354419	2.3176e-06	0	0	0	0.374068	5.19863e-07	0	0	0	0.403749	2.94176e-08	0	0	0	0.404694	2.70024e-08	0	0	0	0.438865	2.55319e-09	0	0	0	0.399445	3.80977e-08	0	0	0	0.388341	7.21728e-08	0	0	0.373253	4.51267e-07	0	0	0	0.377602	3.12779e-07	0
erythritol	erythritol	Xenobiotics	Food Component/Plant	939	0.385873	0.0686478	2.50198e-08	0.358024	5.53544e-07	0	0	0	0.338743	1.57603e-06	0	0	0	0.382827	3.18262e-08	0	0	0	0.386062	2.50766e-08	0	0	0	0.420746	1.88864e-09	0	0	0	0.358038	1.07465e-08	0	0	0	0.337077	1.5553e-07	0	0	0.369009	1.66753e-07	0	0	0	0.347956	6.73534e-07	0
3-hydroxyisobutyrate	X3.hydroxyisobutyrate	Amino Acid	Leucine, Isoleucine and Valine Metabolism	955	0.401754	0.0715155	2.53762e-08	0.399483	9.01242e-08	0	0	0	0.372382	4.5929e-07	0	0	0	0.403582	2.24287e-08	0	0	0	0.399053	2.80427e-08	0	0	0	0.40765	2.5015e-08	0	0	0	0.400033	3.02386e-08	0	0	0	0.388409	6.53506e-08	0	0	0.378544	2.64051e-07	0	0	0	0.403999	3.68391e-08	0
1-palmitoyl-3-linoleoyl-glycerol (16:0/18:2)*	X1.palmitoyl.3.linoleoyl.glycerol..16.0.18.2..	Lipid	Diacylglycerol	963	0.397358	0.0708693	2.68986e-08	0.399438	6.88374e-08	0	0	0	0.404597	3.50304e-08	0	0	0	0.394593	3.3058e-08	0	0	0	0.397414	2.72788e-08	0	0	0	0.38035	1.48795e-07	0	0	0	0.400942	2.06761e-08	0	0	0	0.397321	2.91203e-08	0	0	0.311325	1.27611e-05	0	0	0	0.453953	3.1992e-10	0
1-oleoyl-GPI (18:1)*	X1.oleoyl.GPI..18.1..	Lipid	Lysolipid	955	-0.412715	0.0738847	3.03068e-08	-0.364517	2.09508e-06	0	0	0	-0.381014	5.95595e-07	0	0	0	-0.412071	3.26669e-08	0	0	0	-0.412169	3.20747e-08	0	0	0	-0.420565	2.58991e-08	0	0	0	-0.408296	4.21758e-08	0	0	0	-0.409192	4.2075e-08	0	0	-0.390663	2.58198e-07	0	0	0	-0.341727	4.52651e-06	0
X - 13553	X...13553	NA	NA	932	-0.408348	0.073126	3.08042e-08	-0.424984	2.48864e-08	0	0	0	-0.425582	1.78128e-08	0	0	0	-0.41449	1.86607e-08	0	0	0	-0.409012	2.7938e-08	0	0	0	-0.384615	2.48439e-07	0	0	0	-0.440157	2.41062e-10	0	0	0	-0.448588	1.9298e-10	0	0	-0.372559	6.03438e-07	0	0	0	-0.450477	1.76311e-09	0
X - 16132	X...16132	NA	NA	962	0.380008	0.0682852	3.39852e-08	0.375391	1.39456e-07	0	0	0	0.402018	1.25979e-08	0	0	0	0.380689	3.30381e-08	0	0	0	0.378818	3.67444e-08	0	0	0	0.378164	6.13882e-08	0	0	0	0.38456	2.32861e-08	0	0	0	0.380415	3.533e-08	0	0	0.37892	6.90898e-08	0	0	0	0.40162	9.65169e-09	0
1-arachidonoyl-GPI (20:4)*	X1.arachidonoyl.GPI..20.4..	Lipid	Lysolipid	961	-0.412533	0.0742402	3.55915e-08	-0.412984	1.00689e-07	0	0	0	-0.401069	1.75679e-07	0	0	0	-0.412228	3.74776e-08	0	0	0	-0.412612	3.60327e-08	0	0	0	-0.412539	5.56246e-08	0	0	0	-0.401757	6.68203e-08	0	0	0	-0.406177	5.935e-08	0	0	-0.398387	1.7792e-07	0	0	0	-0.356443	2.23779e-06	0
X - 23659	X...23659	NA	NA	795	0.400175	0.0719595	3.66212e-08	0.370071	7.75743e-07	0	0	0	0.351739	1.98169e-06	0	0	0	0.396567	4.95035e-08	0	0	0	0.400056	3.74278e-08	0	0	0	0.410491	2.34743e-08	0	0	0	0.355134	1.92286e-07	0	0	0	0.354214	3.95804e-07	0	0	0.423681	1.04906e-08	0	0	0	0.387474	1.97028e-07	0
glycosyl-N-palmitoyl-sphingosine	glycosyl.N.palmitoyl.sphingosine	Lipid	Sphingolipid Metabolism	961	-0.404609	0.0733621	4.47758e-08	-0.324248	1.85428e-05	0	0	0	-0.366399	1.24728e-06	0	0	0	-0.400641	5.87823e-08	0	0	0	-0.40486	4.45669e-08	0	0	0	-0.368152	8.04511e-07	0	0	0	-0.405437	4.38239e-08	0	0	0	-0.409929	3.1525e-08	0	0	-0.402834	9.42717e-08	0	0	0	-0.326334	9.63318e-06	0
vanillylmandelate (VMA)	vanillylmandelate..VMA.	Amino Acid	Phenylalanine and Tyrosine Metabolism	943	-0.391686	0.0710144	4.48983e-08	-0.394392	1.0149e-07	0	0	0	-0.404474	3.64007e-08	0	0	0	-0.397184	2.88818e-08	0	0	0	-0.392177	4.3655e-08	0	0	0	-0.367015	3.92383e-07	0	0	0	-0.42008	3.031e-10	0	0	0	-0.427073	7.7479e-10	0	0	-0.3701	3.68606e-07	0	0	0	-0.415603	1.14846e-08	0
lactate	lactate	Carbohydrate	Glycolysis, Gluconeogenesis, and Pyruvate Metabolism	950	0.388114	0.0704029	4.55208e-08	0.389729	1.16202e-07	0	0	0	0.379439	1.86846e-07	0	0	0	0.388328	4.60853e-08	0	0	0	0.386032	4.79265e-08	0	0	0	0.392521	5.04431e-08	0	0	0	0.39593	2.24031e-08	0	0	0	0.389637	4.34248e-08	0	0	0.377899	1.78149e-07	0	0	0	0.400276	3.008e-08	0
X - 16087	X...16087	NA	NA	908	0.374938	0.0680261	4.63186e-08	0.329637	2.99546e-06	0	0	0	0.353392	4.72723e-07	0	0	0	0.370557	6.58482e-08	0	0	0	0.37694	3.76148e-08	0	0	0	0.379774	4.75148e-08	0	0	0	0.349401	9.22162e-08	0	0	0	0.340941	1.84031e-07	0	0	0.361135	2.4109e-07	0	0	0	0.336959	1.19463e-06	0
X - 12410	X...12410	NA	NA	851	0.42129	0.0764878	4.81045e-08	0.386207	1.1546e-06	0	0	0	0.403858	3.00194e-07	0	0	0	0.412592	8.50632e-08	0	0	0	0.42137	4.85915e-08	0	0	0	0.446585	1.13016e-08	0	0	0	0.392429	9.81968e-08	0	0	0	0.388642	2.18714e-07	0	0	0.427463	5.57517e-08	0	0	0	0.388122	7.57276e-07	0
choline	choline	Lipid	Phospholipid Metabolism	954	0.374519	0.0681752	5.0559e-08	0.348626	9.43679e-07	0	0	0	0.382848	5.78911e-08	0	0	0	0.371925	6.18712e-08	0	0	0	0.374591	5.11568e-08	0	0	0	0.36148	2.12848e-07	0	0	0	0.368004	8.14374e-08	0	0	0	0.357562	1.5931e-07	0	0	0.368826	1.40014e-07	0	0	0	0.3676	1.48968e-07	0
1-(1-enyl-palmitoyl)-2-arachidonoyl-GPC (P-16:0/20:4)*	X1..1.enyl.palmitoyl..2.arachidonoyl.GPC..P.16.0.20.4..	Lipid	Plasmalogen	960	-0.403467	0.073968	6.24486e-08	-0.38601	5.47682e-07	0	0	0	-0.399209	1.79742e-07	0	0	0	-0.400627	7.6886e-08	0	0	0	-0.402865	6.608e-08	0	0	0	-0.407571	6.97913e-08	0	0	0	-0.403333	6.55204e-08	0	0	0	-0.419293	1.6887e-08	0	0	-0.333951	8.51253e-06	0	0	0	-0.352895	2.75093e-06	0
3-hydroxyhexanoate	X3.hydroxyhexanoate	Lipid	Fatty Acid, Monohydroxy	959	0.400698	0.0736999	6.88005e-08	0.393637	3.10595e-07	0	0	0	0.373674	8.87243e-07	0	0	0	0.401411	6.70423e-08	0	0	0	0.39877	7.44641e-08	0	0	0	0.403052	8.94571e-08	0	0	0	0.396958	9.20841e-08	0	0	0	0.391981	1.32047e-07	0	0	0.395077	1.85703e-07	0	0	0	0.370717	8.52197e-07	0
N-formylphenylalanine	N.formylphenylalanine	Amino Acid	Phenylalanine and Tyrosine Metabolism	926	0.394947	0.0731782	8.60858e-08	0.402961	1.29028e-07	0	0	0	0.425936	1.81357e-08	0	0	0	0.396307	8.08111e-08	0	0	0	0.394282	9.04445e-08	0	0	0	0.394576	1.34758e-07	0	0	0	0.398656	6.64215e-08	0	0	0	0.396596	8.19929e-08	0	0	0.378185	4.81025e-07	0	0	0	0.429909	9.68804e-09	0
methyl glucopyranoside (alpha + beta)	methyl.glucopyranoside..alpha...beta.	Xenobiotics	Food Component/Plant	820	-0.430211	0.0801597	1.04312e-07	-0.46754	2.39085e-08	0	0	0	-0.452951	4.94828e-08	0	0	0	-0.438529	5.40035e-08	0	0	0	-0.430425	1.04378e-07	0	0	0	-0.431382	1.30701e-07	0	0	0	-0.453937	1.93945e-08	0	0	0	-0.449425	2.86954e-08	0	0	-0.407813	7.8073e-07	0	0	0	-0.471626	1.22285e-08	0
5,6-dihydrothymine	X5.6.dihydrothymine	Nucleotide	Pyrimidine Metabolism, Thymine containing	957	-0.398755	0.0745607	1.11228e-07	-0.405359	1.83916e-07	0	0	0	-0.405944	1.37798e-07	0	0	0	-0.401186	9.44337e-08	0	0	0	-0.399539	1.05748e-07	0	0	0	-0.377083	7.04652e-07	0	0	0	-0.407831	5.18719e-08	0	0	0	-0.41562	2.85408e-08	0	0	-0.401185	1.66337e-07	0	0	0	-0.418549	4.31344e-08	0
pseudouridine	pseudouridine	Nucleotide	Pyrimidine Metabolism, Uracil containing	942	-0.395512	0.0745376	1.39581e-07	-0.403539	2.08677e-07	0	0	0	-0.426385	3.05724e-08	0	0	0	-0.39865	1.13869e-07	0	0	0	-0.395382	1.43209e-07	0	0	0	-0.354511	2.80285e-06	0	0	0	-0.423338	2.12607e-10	0	0	0	-0.448467	1.07396e-10	0	0	-0.405631	1.16091e-07	0	0	0	-0.460726	1.23761e-09	0
X - 22145	X...22145	NA	NA	916	0.397792	0.0750704	1.45998e-07	0.402272	2.88372e-07	0	0	0	0.445394	9.58652e-09	0	0	0	0.394485	1.83914e-07	0	0	0	0.396603	1.52004e-07	0	0	0	0.402619	1.61971e-07	0	0	0	0.393377	2.01082e-07	0	0	0	0.388434	2.88986e-07	0	0	0.385797	5.42508e-07	0	0	0	0.368051	1.60988e-06	0
N-acetylglutamine	N.acetylglutamine	Amino Acid	Glutamate Metabolism	915	-0.400828	0.0757205	1.50278e-07	-0.438785	2.75865e-08	0	0	0	-0.457109	4.9682e-09	0	0	0	-0.40518	1.09117e-07	0	0	0	-0.399204	1.68889e-07	0	0	0	-0.359196	2.97986e-06	0	0	0	-0.424098	1.34076e-08	0	0	0	-0.434687	5.00877e-09	0	0	-0.387384	6.47282e-07	0	0	0	-0.430234	2.88653e-08	0
gamma-glutamylleucine	gamma.glutamylleucine	Peptide	Gamma-glutamyl Amino Acid	961	0.349623	0.0660905	1.51449e-07	0.323324	2.61892e-06	0	0	0	0.352346	2.51354e-07	0	0	0	0.348171	1.73393e-07	0	0	0	0.349085	1.59792e-07	0	0	0	0.36001	9.8845e-08	0	0	0	0.342392	2.5271e-07	0	0	0	0.336577	3.96475e-07	0	0	0.319064	2.43455e-06	0	0	0	0.360012	1.07122e-07	0
X - 21353	X...21353	NA	NA	961	0.390662	0.0740076	1.60893e-07	0.418255	6.19542e-08	0	0	0	0.390775	3.30772e-07	0	0	0	0.391498	1.55408e-07	0	0	0	0.389148	1.75318e-07	0	0	0	0.382523	4.22869e-07	0	0	0	0.39981	7.52163e-08	0	0	0	0.39408	1.33647e-07	0	0	0.398046	1.68554e-07	0	0	0	0.391136	2.51048e-07	0
X - 15492	X...15492	NA	NA	929	0.375331	0.0715123	1.90076e-07	0.406396	4.82907e-08	0	0	0	0.368189	6.16045e-07	0	0	0	0.376802	1.75089e-07	0	0	0	0.374417	2.04551e-07	0	0	0	0.393517	6.89378e-08	0	0	0	0.355273	5.1651e-07	0	0	0	0.353385	6.8508e-07	0	0	0.370331	4.77924e-07	0	0	0	0.357553	1.0219e-06	0
X - 11522	X...11522	NA	NA	961	-0.360234	0.068798	2.01463e-07	-0.357778	6.16171e-07	0	0	0	-0.351317	7.66757e-07	0	0	0	-0.358121	2.38854e-07	0	0	0	-0.359896	2.07449e-07	0	0	0	-0.339554	1.29388e-06	0	0	0	-0.364568	1.44845e-07	0	0	0	-0.365358	1.42014e-07	0	0	-0.353205	5.78871e-07	0	0	0	-0.377178	8.7962e-08	0
docosatrienoate (22:3n3)	docosatrienoate..22.3n3.	Lipid	Polyunsaturated Fatty Acid (n3 and n6)	800	0.426441	0.0817097	2.29453e-07	0.459618	7.61892e-08	0	0	0	0.448843	1.22956e-07	0	0	0	0.425433	2.62201e-07	0	0	0	0.424647	2.59401e-07	0	0	0	0.424493	3.59388e-07	0	0	0	0.431523	1.48479e-07	0	0	0	0.43034	1.80678e-07	0	0	0.421617	4.76865e-07	0	0	0	0.435883	1.86631e-07	0
X - 24263	X...24263	NA	NA	955	0.37723	0.0727493	2.63212e-07	0.315132	2.88492e-05	0	0	0	0.348416	3.45192e-06	0	0	0	0.37677	2.77389e-07	0	0	0	0.376749	2.759e-07	0	0	0	0.358184	1.37809e-06	0	0	0	0.380613	2.10556e-07	0	0	0	0.370732	4.36297e-07	0	0	0.340413	4.85354e-06	0	0	0	0.376485	4.45874e-07	0
X - 11429	X...11429	NA	NA	940	-0.384766	0.0744698	2.90905e-07	-0.390982	4.73715e-07	0	0	0	-0.409393	1.03941e-07	0	0	0	-0.389761	2.04267e-07	0	0	0	-0.384918	2.9227e-07	0	0	0	-0.347506	4.3088e-06	0	0	0	-0.407296	1.42907e-09	0	0	0	-0.436217	4.55865e-10	0	0	-0.399812	1.69474e-07	0	0	0	-0.450698	2.5833e-09	0
1-stearoyl-2-oleoyl-GPE (18:0/18:1)	X1.stearoyl.2.oleoyl.GPE..18.0.18.1.	Lipid	Phospholipid Metabolism	959	0.382134	0.0741291	3.08046e-07	0.347478	6.63825e-06	0	0	0	0.360168	2.51032e-06	0	0	0	0.380449	3.5096e-07	0	0	0	0.381364	3.27414e-07	0	0	0	0.361858	1.67667e-06	0	0	0	0.381936	3.23977e-07	0	0	0	0.374697	5.30514e-07	0	0	0.328493	1.38399e-05	0	0	0	0.395639	1.88822e-07	0
N-acetyltryptophan	N.acetyltryptophan	Amino Acid	Tryptophan Metabolism	950	-0.371195	0.0729	4.27512e-07	-0.370813	1.1032e-06	0	0	0	-0.40517	7.61591e-08	0	0	0	-0.369567	4.92021e-07	0	0	0	-0.37187	4.10614e-07	0	0	0	-0.355347	1.75166e-06	0	0	0	-0.390108	6.22389e-08	0	0	0	-0.401903	2.86504e-08	0	0	-0.393849	1.38549e-07	0	0	0	-0.393582	1.37128e-07	0
1-oleoylglycerol (18:1)	X1.oleoylglycerol..18.1.	Lipid	Monoacylglycerol	953	0.360222	0.0713246	5.28028e-07	0.336196	5.93534e-06	0	0	0	0.339727	4.06181e-06	0	0	0	0.358134	6.15406e-07	0	0	0	0.360592	5.20566e-07	0	0	0	0.350614	1.42349e-06	0	0	0	0.364701	3.88603e-07	0	0	0	0.355744	7.63666e-07	0	0	0.272979	0.000142058	1	1	0	0.388421	1.0501e-07	0
thioproline	thioproline	Amino Acid	Tryptophan Metabolism	962	-0.329253	0.0653284	5.56134e-07	-0.338374	6.89948e-07	0	0	0	-0.32913	1.08721e-06	0	0	0	-0.328359	6.09236e-07	0	0	0	-0.329821	5.36015e-07	0	0	0	-0.335273	5.08668e-07	0	0	0	-0.321661	9.24374e-07	0	0	0	-0.323239	9.11607e-07	0	0	-0.331102	8.07339e-07	0	0	0	-0.322125	1.47114e-06	0
N6-carboxymethyllysine	N6.carboxymethyllysine	Carbohydrate	Advanced Glycation End-product	871	0.375101	0.0747996	6.43525e-07	0.341799	1.11281e-05	0	0	0	0.339514	1.00819e-05	0	0	0	0.369625	9.41884e-07	0	0	0	0.376212	6.02439e-07	0	0	0	0.377455	7.89957e-07	0	0	0	0.351188	1.62273e-06	0	0	0	0.331046	5.20978e-06	0	0	0.371985	1.32447e-06	0	0	0	0.358936	3.16459e-06	0
urate	urate	Nucleotide	Purine Metabolism, (Hypo)Xanthine/Inosine containing	963	-0.348677	0.0701363	7.86554e-07	-0.331058	5.88893e-06	0	0	0	-0.36927	3.47913e-07	0	0	0	-0.349887	7.35308e-07	0	0	0	-0.349063	7.74088e-07	0	0	0	-0.310216	1.30439e-05	0	0	0	-0.367903	1.015e-07	0	0	0	-0.377628	4.94621e-08	0	0	-0.351305	1.08935e-06	0	0	0	-0.366501	3.34691e-07	0
X - 11530	X...11530	NA	NA	961	-0.343222	0.0690491	7.89691e-07	-0.335695	3.09779e-06	0	0	0	-0.331308	3.35372e-06	0	0	0	-0.341031	9.33098e-07	0	0	0	-0.34278	8.24617e-07	0	0	0	-0.323881	4.17841e-06	0	0	0	-0.346554	6.2788e-07	0	0	0	-0.348248	5.69289e-07	0	0	-0.3349	2.34022e-06	0	0	0	-0.354021	5.63469e-07	0
prolylglycine	prolylglycine	Peptide	Dipeptide	857	0.3912	0.0790874	9.09708e-07	0.331602	5.19705e-05	0	0	0	0.340267	2.92781e-05	0	0	0	0.387125	1.15509e-06	0	0	0	0.390299	9.82976e-07	0	0	0	0.381053	2.29639e-06	0	0	0	0.376022	1.92679e-06	0	0	0	0.368841	3.09406e-06	0	0	0.381382	2.51219e-06	0	0	0	0.355232	1.18946e-05	0
margarate (17:0)	margarate..17.0.	Lipid	Long Chain Fatty Acid	958	0.362036	0.0741898	1.24291e-06	0.37863	9.70829e-07	0	0	0	0.386013	4.80203e-07	0	0	0	0.362466	1.23372e-06	0	0	0	0.360783	1.33922e-06	0	0	0	0.358982	2.1164e-06	0	0	0	0.368041	8.19348e-07	0	0	0	0.360739	1.4388e-06	0	0	0.345428	5.68631e-06	0	0	0	0.378401	6.41868e-07	0
1-palmitoyl-2-linoleoyl-GPE (16:0/18:2)	X1.palmitoyl.2.linoleoyl.GPE..16.0.18.2.	Lipid	Phospholipid Metabolism	958	0.359775	0.0739262	1.32656e-06	0.375208	1.14805e-06	0	0	0	0.354903	3.26958e-06	0	0	0	0.356829	1.61775e-06	0	0	0	0.359393	1.37619e-06	0	0	0	0.360629	1.78644e-06	0	0	0	0.357757	1.5524e-06	0	0	0	0.354491	1.95913e-06	0	0	0.293873	9.09166e-05	1	1	0	0.388663	2.74462e-07	0
sphingomyelin (d18:1/17:0, d17:1/18:0, d19:1/16:0)	sphingomyelin..d18.1.17.0..d17.1.18.0..d19.1.16.0.	Lipid	Sphingolipid Metabolism	962	-0.361058	0.0742198	1.33864e-06	-0.342198	9.54067e-06	0	0	0	-0.313581	3.91041e-05	0	0	0	-0.358162	1.62332e-06	0	0	0	-0.360222	1.41622e-06	0	0	0	-0.360885	1.9199e-06	0	0	0	-0.356049	1.8554e-06	0	0	0	-0.365184	1.06434e-06	0	0	-0.315837	3.09758e-05	0	0	0	-0.263141	0.00036576	1
isobutyrylglycine	isobutyrylglycine	Amino Acid	Leucine, Isoleucine and Valine Metabolism	874	0.373291	0.0771313	1.53714e-06	0.390016	1.32168e-06	0	0	0	0.383872	1.41566e-06	0	0	0	0.370342	1.87242e-06	0	0	0	0.373556	1.52488e-06	0	0	0	0.373116	2.076e-06	0	0	0	0.370111	1.86863e-06	0	0	0	0.359706	3.28982e-06	0	0	0.352804	8.64365e-06	0	0	0	0.383752	1.2317e-06	0
guanosine	guanosine	Nucleotide	Purine Metabolism, Guanine containing	803	-0.374185	0.0779875	1.91054e-06	-0.370269	6.20719e-06	0	0	0	-0.395827	1.09445e-06	0	0	0	-0.374231	1.92076e-06	0	0	0	-0.373706	1.99707e-06	0	0	0	-0.378254	1.90476e-06	0	0	0	-0.379282	1.45983e-06	0	0	0	-0.384018	1.10619e-06	0	0	-0.380175	1.93359e-06	0	0	0	-0.384141	1.81873e-06	0
X - 12846	X...12846	NA	NA	891	0.345237	0.0721664	2.0114e-06	0.365718	1.22117e-06	0	0	0	0.325866	1.21388e-05	0	0	0	0.342185	2.55664e-06	0	0	0	0.341344	2.47813e-06	0	0	0	0.363958	7.36985e-07	0	0	0	0.321943	5.10733e-06	0	0	0	0.318957	7.51085e-06	0	0	0.349023	2.54927e-06	0	0	0	0.325275	1.08951e-05	0
4-hydroxyphenylacetate	X4.hydroxyphenylacetate	Amino Acid	Phenylalanine and Tyrosine Metabolism	846	0.376971	0.0788168	2.03809e-06	0.393203	1.71744e-06	0	0	0	0.360105	9.28603e-06	0	0	0	0.375508	2.28424e-06	0	0	0	0.377334	2.015e-06	0	0	0	0.375049	3.03835e-06	0	0	0	0.363976	3.07562e-06	0	0	0	0.349501	7.82828e-06	0	0	0.360316	8.46246e-06	0	0	0	0.355662	1.07897e-05	0
X - 19823	X...19823	NA	NA	834	-0.375809	0.0792174	2.46422e-06	-0.382787	3.83944e-06	0	0	0	-0.362007	1.1503e-05	0	0	0	-0.375795	2.5054e-06	0	0	0	-0.374912	2.55614e-06	0	0	0	-0.371106	4.39553e-06	0	0	0	-0.362442	5.36197e-06	0	0	0	-0.355327	8.19425e-06	0	0	-0.339779	2.73852e-05	0	0	0	-0.334797	4.00751e-05	0
cholesterol	cholesterol	Lipid	Sterol	962	-0.350885	0.0742733	2.65362e-06	-0.29529	0.000124778	1	1	0	-0.313456	4.10938e-05	0	0	0	-0.347908	3.20032e-06	0	0	0	-0.350856	2.69379e-06	0	0	0	-0.33103	1.21284e-05	0	0	0	-0.348925	3.08919e-06	0	0	0	-0.357392	1.79092e-06	0	0	-0.337389	9.66766e-06	0	0	0	-0.223773	0.00202509	1
1-linolenoyl-GPC (18:3)*	X1.linolenoyl.GPC..18.3..	Lipid	Lysolipid	955	-0.350495	0.0743243	2.76679e-06	-0.344808	8.57875e-06	0	0	0	-0.328766	1.78886e-05	0	0	0	-0.348922	3.10199e-06	0	0	0	-0.350395	2.79882e-06	0	0	0	-0.340261	7.25681e-06	0	0	0	-0.347039	3.51428e-06	0	0	0	-0.348038	3.41101e-06	0	0	-0.31191	3.93974e-05	0	0	0	-0.326255	1.73036e-05	0
X - 12026	X...12026	NA	NA	942	-0.33817	0.0717498	2.80634e-06	-0.344296	4.03258e-06	0	0	0	-0.352655	1.91327e-06	0	0	0	-0.344596	1.76369e-06	0	0	0	-0.338706	2.71853e-06	0	0	0	-0.311203	1.98039e-05	0	0	0	-0.367572	1.26664e-08	0	0	0	-0.384941	1.49734e-08	0	0	-0.355156	1.34517e-06	0	0	0	-0.393124	7.32471e-08	0
threonylphenylalanine	threonylphenylalanine	Peptide	Dipeptide	946	-0.341553	0.0724719	2.80842e-06	-0.336601	8.45807e-06	0	0	0	-0.337318	6.45956e-06	0	0	0	-0.334392	4.26785e-06	0	0	0	-0.340531	2.93497e-06	0	0	0	-0.342754	3.58866e-06	0	0	0	-0.335402	4.15301e-06	0	0	0	-0.338389	3.62068e-06	0	0	-0.29622	5.88714e-05	0	0	0	-0.337567	5.35345e-06	0
X - 15469	X...15469	NA	NA	942	0.348379	0.0745381	3.38678e-06	0.366325	2.39767e-06	0	0	0	0.337684	1.14324e-05	0	0	0	0.347247	3.7009e-06	0	0	0	0.346998	3.67525e-06	0	0	0	0.35884	2.35428e-06	0	0	0	0.332748	7.49103e-06	0	0	0	0.322608	1.31448e-05	0	0	0.338973	9.01187e-06	0	0	0	0.325587	1.92604e-05	0
X - 16135	X...16135	NA	NA	813	-0.357291	0.0764282	3.4428e-06	-0.394991	6.48475e-07	0	0	0	-0.387214	1.01525e-06	0	0	0	-0.357445	3.46147e-06	0	0	0	-0.358616	3.00024e-06	0	0	0	-0.337506	1.35248e-05	0	0	0	-0.36455	2.32777e-06	0	0	0	-0.363761	2.61626e-06	0	0	-0.338049	1.59589e-05	0	0	0	-0.358318	5.8242e-06	0
X - 24020	X...24020	NA	NA	933	-0.351809	0.0755246	3.65282e-06	-0.392422	6.69161e-07	0	0	0	-0.369351	2.16863e-06	0	0	0	-0.355242	2.93365e-06	0	0	0	-0.351765	3.71133e-06	0	0	0	-0.335033	1.40057e-05	0	0	0	-0.366577	1.21497e-06	0	0	0	-0.377322	5.47613e-07	0	0	-0.368145	1.89376e-06	0	0	0	-0.363413	2.6138e-06	0
theobromine	theobromine	Xenobiotics	Xanthine Metabolism	955	-0.342233	0.0737551	3.96749e-06	-0.350019	5.43452e-06	0	0	0	-0.359192	2.40886e-06	0	0	0	-0.339484	4.7402e-06	0	0	0	-0.343019	3.78621e-06	0	0	0	-0.359121	1.82401e-06	0	0	0	-0.339029	4.91824e-06	0	0	0	-0.333553	6.94277e-06	0	0	-0.308935	4.27032e-05	0	0	0	-0.311147	3.52039e-05	0
sphingomyelin (d18:1/20:0, d16:1/22:0)*	sphingomyelin..d18.1.20.0..d16.1.22.0..	Lipid	Sphingolipid Metabolism	959	-0.340914	0.0736663	4.20277e-06	-0.322261	2.59481e-05	0	0	0	-0.29839	8.09936e-05	1	1	0	-0.337411	5.22405e-06	0	0	0	-0.340282	4.39008e-06	0	0	0	-0.353169	2.63397e-06	0	0	0	-0.334902	6.0832e-06	0	0	0	-0.34396	3.62674e-06	0	0	-0.291942	0.00010298	1	1	0	-0.235959	0.00121565	1
leucine	leucine	Amino Acid	Leucine, Isoleucine and Valine Metabolism	961	0.33102	0.0717359	4.47559e-06	0.31117	3.11029e-05	0	0	0	0.330629	7.99969e-06	0	0	0	0.331589	4.39734e-06	0	0	0	0.330684	4.6261e-06	0	0	0	0.320192	1.22675e-05	0	0	0	0.335484	3.34211e-06	0	0	0	0.323306	7.49656e-06	0	0	0.295089	5.67534e-05	0	0	0	0.337532	4.33856e-06	0
X - 21471	X...21471	NA	NA	940	0.345852	0.075285	4.94245e-06	0.270383	0.00050296	1	1	0	0.334961	1.61655e-05	0	0	0	0.340151	6.90521e-06	0	0	0	0.345789	5.0216e-06	0	0	0	0.346492	6.53474e-06	0	0	0	0.33829	7.53133e-06	0	0	0	0.336076	9.0816e-06	0	0	0.317904	3.60284e-05	0	0	0	0.276748	0.000268921	1
tartronate (hydroxymalonate)	tartronate..hydroxymalonate.	Xenobiotics	Bacterial/Fungal	963	-0.317234	0.0691226	5.03199e-06	-0.298348	3.38644e-05	0	0	0	-0.295965	3.23174e-05	0	0	0	-0.316081	5.53386e-06	0	0	0	-0.316659	5.26513e-06	0	0	0	-0.302316	1.77871e-05	0	0	0	-0.308849	8.30272e-06	0	0	0	-0.301778	1.2867e-05	0	0	-0.289781	4.15559e-05	0	0	0	-0.324528	4.46959e-06	0
N-methylproline	N.methylproline	Amino Acid	Urea cycle; Arginine and Proline Metabolism	958	-0.33401	0.0734135	6.0612e-06	-0.361786	2.25807e-06	0	0	0	-0.339614	7.41314e-06	0	0	0	-0.337146	4.95149e-06	0	0	0	-0.334465	5.94365e-06	0	0	0	-0.321266	1.75555e-05	0	0	0	-0.337228	5.01499e-06	0	0	0	-0.334842	6.05119e-06	0	0	-0.338994	6.85153e-06	0	0	0	-0.348708	3.44558e-06	0
glycerol	glycerol	Lipid	Glycerolipid Metabolism	962	0.310173	0.0682357	6.17471e-06	0.309026	1.37881e-05	0	0	0	0.31659	6.96999e-06	0	0	0	0.307821	7.23277e-06	0	0	0	0.309354	6.51673e-06	0	0	0	0.303619	1.28989e-05	0	0	0	0.31081	6.09231e-06	0	0	0	0.306603	8.21217e-06	0	0	0.310188	9.42735e-06	0	0	0	0.321743	4.02994e-06	0
X - 21467	X...21467	NA	NA	957	0.328936	0.07278	6.9707e-06	0.248109	0.000934576	1	1	0	0.318002	2.30179e-05	0	0	0	0.324108	9.17232e-06	0	0	0	0.32812	7.34556e-06	0	0	0	0.327038	1.05231e-05	0	0	0	0.318989	1.1904e-05	0	0	0	0.313792	1.68421e-05	0	0	0.292275	8.45965e-05	1	1	0	0.277374	0.000170192	1
carnitine	carnitine	Lipid	Carnitine Metabolism	963	-0.336254	0.0745439	7.25373e-06	-0.363723	2.81994e-06	0	0	0	-0.364651	2.12352e-06	0	0	0	-0.336504	7.28579e-06	0	0	0	-0.33586	7.50884e-06	0	0	0	-0.297064	8.51674e-05	1	1	0	-0.343791	4.33585e-06	0	0	0	-0.350734	2.72313e-06	0	0	-0.363268	1.99927e-06	0	0	0	-0.343615	6.64302e-06	0
myristate (14:0)	myristate..14.0.	Lipid	Long Chain Fatty Acid	962	0.334601	0.0742468	7.39696e-06	0.385263	6.10369e-07	0	0	0	0.354886	3.65554e-06	0	0	0	0.335786	6.9635e-06	0	0	0	0.333321	7.89814e-06	0	0	0	0.342946	6.00857e-06	0	0	0	0.340433	5.08986e-06	0	0	0	0.338431	6.08736e-06	0	0	0.321276	2.43915e-05	0	0	0	0.348059	4.59386e-06	0
dopamine sulfate (2)	dopamine.sulfate..2.	Amino Acid	Phenylalanine and Tyrosine Metabolism	945	0.328327	0.0734068	8.66225e-06	0.311959	4.50191e-05	0	0	0	0.310013	4.24751e-05	0	0	0	0.327908	9.03583e-06	0	0	0	0.328669	8.52257e-06	0	0	0	0.340713	5.43845e-06	0	0	0	0.318343	1.43288e-05	0	0	0	0.31148	2.1584e-05	0	0	0.315788	2.71745e-05	0	0	0	0.309076	3.72927e-05	0
homoarginine	homoarginine	Amino Acid	Urea cycle; Arginine and Proline Metabolism	961	-0.315619	0.0712393	1.04866e-05	-0.307193	3.50473e-05	0	0	0	-0.345681	2.56421e-06	0	0	0	-0.312889	1.25117e-05	0	0	0	-0.31553	1.06697e-05	0	0	0	-0.331382	5.10099e-06	0	0	0	-0.312231	1.31159e-05	0	0	0	-0.316948	1.00864e-05	0	0	-0.308727	2.38242e-05	0	0	0	-0.291847	5.94756e-05	0
maltose	maltose	Carbohydrate	Glycogen Metabolism	820	0.345558	0.0779453	1.05407e-05	0.358599	1.05959e-05	0	0	0	0.36384	6.0477e-06	0	0	0	0.343238	1.21791e-05	0	0	0	0.345634	1.05608e-05	0	0	0	0.357225	6.64457e-06	0	0	0	0.329005	1.71474e-05	0	0	0	0.318695	3.53115e-05	0	0	0.33663	2.42438e-05	0	0	0	0.331042	3.32637e-05	0
X - 11334	X...11334	NA	NA	938	0.309216	0.0698407	1.06567e-05	0.288044	7.22223e-05	1	1	0	0.268201	0.000176684	1	1	0	0.303441	1.53775e-05	0	0	0	0.308256	1.11949e-05	0	0	0	0.330163	3.4557e-06	0	0	0	0.284303	1.07012e-05	0	0	0	0.276156	2.94985e-05	0	0	0.304177	2.1339e-05	0	0	0	0.257844	0.000265491	1
1-palmitoyl-2-stearoyl-GPC (16:0/18:0)	X1.palmitoyl.2.stearoyl.GPC..16.0.18.0.	Lipid	Phospholipid Metabolism	962	-0.328612	0.0742657	1.0755e-05	-0.311966	5.43374e-05	0	0	0	-0.304084	7.05114e-05	1	1	0	-0.328324	1.11567e-05	0	0	0	-0.328184	1.11513e-05	0	0	0	-0.328285	1.4692e-05	0	0	0	-0.325513	1.31935e-05	0	0	0	-0.333971	8.00432e-06	0	0	-0.307395	5.33294e-05	0	0	0	-0.223331	0.00237812	1
X - 17178	X...17178	NA	NA	937	-0.325639	0.073909	1.17479e-05	-0.302586	8.08833e-05	1	1	0	-0.27805	0.000248385	1	1	0	-0.325157	1.22251e-05	0	0	0	-0.325962	1.14948e-05	0	0	0	-0.297015	7.7591e-05	1	1	0	-0.332494	7.60417e-06	0	0	0	-0.332383	8.05484e-06	0	0	-0.337393	8.45304e-06	0	0	0	-0.306528	5.02109e-05	0
palmitate (16:0)	palmitate..16.0.	Lipid	Long Chain Fatty Acid	959	0.327497	0.074734	1.30464e-05	0.366448	2.43229e-06	0	0	0	0.346306	7.00995e-06	0	0	0	0.327309	1.34114e-05	0	0	0	0.326534	1.37456e-05	0	0	0	0.329041	1.58752e-05	0	0	0	0.333326	9.05749e-06	0	0	0	0.330092	1.16697e-05	0	0	0.316941	3.4932e-05	0	0	0	0.346741	5.63403e-06	0
sphingomyelin (d18:1/14:0, d16:1/16:0)*	sphingomyelin..d18.1.14.0..d16.1.16.0..	Lipid	Sphingolipid Metabolism	962	-0.323523	0.0743844	1.51115e-05	-0.290508	0.000170434	1	1	0	-0.301701	8.28738e-05	1	1	0	-0.32115	1.75424e-05	0	0	0	-0.322799	1.58322e-05	0	0	0	-0.322834	2.08924e-05	0	0	0	-0.321983	1.69773e-05	0	0	0	-0.331993	9.14833e-06	0	0	-0.265094	0.000456246	1	1	0	-0.227769	0.00209939	1
4-hydroxychlorothalonil	X4.hydroxychlorothalonil	Xenobiotics	Chemical	956	-0.321909	0.0740918	1.54352e-05	-0.334036	1.50179e-05	0	0	0	-0.294328	0.000113098	1	1	0	-0.315912	2.09153e-05	0	0	0	-0.321235	1.6163e-05	0	0	0	-0.326059	1.60814e-05	0	0	0	-0.308613	2.36126e-05	0	0	0	-0.2968	4.90715e-05	0	0	-0.287414	0.000147765	1	1	0	-0.277933	0.000227043	1
arachidonate (20:4n6)	arachidonate..20.4n6.	Lipid	Polyunsaturated Fatty Acid (n3 and n6)	962	-0.320918	0.074352	1.75167e-05	-0.339948	1.12807e-05	0	0	0	-0.310073	5.24341e-05	0	0	0	-0.321264	1.74664e-05	0	0	0	-0.319713	1.86615e-05	0	0	0	-0.341629	6.50781e-06	0	0	0	-0.308805	3.1275e-05	0	0	0	-0.315247	2.52448e-05	0	0	-0.307421	5.47611e-05	0	0	0	-0.281024	0.000202087	1
phenylalanine	phenylalanine	Amino Acid	Phenylalanine and Tyrosine Metabolism	962	0.295629	0.0685794	1.79444e-05	0.275965	0.000109665	1	1	0	0.303668	1.77582e-05	0	0	0	0.294659	1.94118e-05	0	0	0	0.29512	1.86771e-05	0	0	0	0.281095	5.72657e-05	0	0	0	0.295378	1.87004e-05	0	0	0	0.285729	3.33936e-05	0	0	0.273591	9.7064e-05	1	1	0	0.306234	1.26512e-05	0
behenoyl sphingomyelin (d18:1/22:0)*	behenoyl.sphingomyelin..d18.1.22.0..	Lipid	Sphingolipid Metabolism	963	-0.313479	0.0728283	1.84591e-05	-0.273582	0.000295439	1	1	0	-0.266317	0.0003655	1	1	0	-0.309603	2.30248e-05	0	0	0	-0.31354	1.85969e-05	0	0	0	-0.325966	1.13706e-05	0	0	0	-0.306158	2.76596e-05	0	0	0	-0.312381	2.06125e-05	0	0	-0.280894	0.000162575	1	1	0	-0.194269	0.00642279	1
X - 11795	X...11795	NA	NA	956	-0.317875	0.073926	1.88392e-05	-0.33889	1.09956e-05	0	0	0	-0.333139	1.2825e-05	0	0	0	-0.316178	2.10942e-05	0	0	0	-0.318174	1.85887e-05	0	0	0	-0.28945	0.00011703	1	1	0	-0.325221	1.15515e-05	0	0	0	-0.325017	1.24824e-05	0	0	-0.320192	2.39694e-05	0	0	0	-0.315335	3.03376e-05	0
stearoyl sphingomyelin (d18:1/18:0)	stearoyl.sphingomyelin..d18.1.18.0.	Lipid	Sphingolipid Metabolism	959	-0.314219	0.0731715	1.93091e-05	-0.304348	6.48212e-05	1	0	0	-0.267554	0.000367718	1	1	0	-0.31186	2.24012e-05	0	0	0	-0.313965	1.98e-05	0	0	0	-0.313109	2.71624e-05	0	0	0	-0.30802	2.7473e-05	0	0	0	-0.310186	2.55307e-05	0	0	-0.291523	0.000100234	1	1	0	-0.2196	0.00252082	1
docosadienoate (22:2n6)	docosadienoate..22.2n6.	Lipid	Polyunsaturated Fatty Acid (n3 and n6)	954	0.318478	0.0745505	2.13165e-05	0.344786	9.14987e-06	0	0	0	0.329333	1.90421e-05	0	0	0	0.318911	2.11277e-05	0	0	0	0.317374	2.24189e-05	0	0	0	0.309309	4.67106e-05	0	0	0	0.324851	1.43551e-05	0	0	0	0.319464	2.10664e-05	0	0	0.305439	6.4852e-05	1	1	0	0.32254	2.35379e-05	0
threonine	threonine	Amino Acid	Glycine, Serine and Threonine Metabolism	961	-0.313488	0.0734178	2.14941e-05	-0.333414	1.29764e-05	0	0	0	-0.338279	7.91556e-06	0	0	0	-0.313718	2.1583e-05	0	0	0	-0.313414	2.1831e-05	0	0	0	-0.305674	4.41874e-05	0	0	0	-0.314348	2.092e-05	0	0	0	-0.325555	1.00139e-05	0	0	-0.309737	3.89165e-05	0	0	0	-0.327589	1.27629e-05	0
X - 24287	X...24287	NA	NA	941	0.310656	0.0727943	2.17591e-05	0.300327	7.65253e-05	1	1	0	0.307263	4.2316e-05	0	0	0	0.309031	2.3877e-05	0	0	0	0.310977	2.15779e-05	0	0	0	0.295941	6.89293e-05	1	1	0	0.3137	1.82151e-05	0	0	0	0.311861	2.10918e-05	0	0	0.232161	0.00149787	1	1	0	0.354035	1.85318e-06	0
5-hydroxyindoleacetate	X5.hydroxyindoleacetate	Amino Acid	Tryptophan Metabolism	771	0.344403	0.0806308	2.18554e-05	0.30549	0.000258017	1	1	0	0.303929	0.000235691	1	1	0	0.341151	2.60933e-05	0	0	0	0.343725	2.28314e-05	0	0	0	0.353677	1.59918e-05	0	0	0	0.317367	5.23997e-05	0	0	0	0.302292	0.000114145	1	0	0.357754	1.45521e-05	0	0	0	0.317286	0.000122063	1
bilirubin (Z,Z)	bilirubin..Z.Z.	Cofactors and Vitamins	Hemoglobin and Porphyrin Metabolism	958	-0.292812	0.0687977	2.28438e-05	-0.301716	2.55602e-05	0	0	0	-0.302066	2.1008e-05	0	0	0	-0.291012	2.57959e-05	0	0	0	-0.293025	2.27679e-05	0	0	0	-0.286942	4.29765e-05	0	0	0	-0.290826	2.64677e-05	0	0	0	-0.289811	2.88367e-05	0	0	-0.270789	0.000120651	1	1	0	-0.288634	4.08328e-05	0
X - 23297	X...23297	NA	NA	918	0.323898	0.0763284	2.42431e-05	0.337136	2.11094e-05	0	0	0	0.308922	8.02313e-05	1	1	0	0.323742	2.49601e-05	0	0	0	0.322927	2.57856e-05	0	0	0	0.337469	1.44675e-05	0	0	0	0.326498	2.11512e-05	0	0	0	0.323005	2.64065e-05	0	0	0.321843	3.92591e-05	0	0	0	0.31915	4.42735e-05	0
pyridoxate	pyridoxate	Cofactors and Vitamins	Vitamin B6 Metabolism	926	0.310937	0.0733	2.43824e-05	0.30067	8.21035e-05	1	1	0	0.275407	0.000254596	1	1	0	0.307208	3.03188e-05	0	0	0	0.310494	2.52117e-05	0	0	0	0.322667	1.56289e-05	0	0	0	0.29269	4.78521e-05	0	0	0	0.296633	4.75304e-05	0	0	0.303562	5.09596e-05	0	0	0	0.263186	0.000407482	1
creatinine	creatinine	Amino Acid	Creatine Metabolism	950	-0.283419	0.0669965	2.55894e-05	-0.283997	4.64369e-05	0	0	0	-0.306842	8.80291e-06	0	0	0	-0.28742	1.98636e-05	0	0	0	-0.283917	2.49399e-05	0	0	0	-0.257911	0.000150854	1	1	0	-0.319299	2.95393e-08	0	0	0	-0.33231	1.32701e-07	0	0	-0.279077	4.7129e-05	0	0	0	-0.315938	3.90096e-06	0
cysteine sulfinic acid	cysteine.sulfinic.acid	Amino Acid	Methionine, Cysteine, SAM and Taurine Metabolism	960	0.294048	0.0698525	2.79893e-05	0.277056	0.000138535	1	1	0	0.290892	5.36315e-05	0	0	0	0.29577	2.5435e-05	0	0	0	0.293741	2.88043e-05	0	0	0	0.307228	1.58628e-05	0	0	0	0.294488	2.77925e-05	0	0	0	0.285849	4.6046e-05	0	0	0.274304	0.000125617	1	1	0	0.304932	1.96394e-05	0
X - 21626	X...21626	NA	NA	885	-0.301458	0.0719179	3.04696e-05	-0.326456	1.29426e-05	0	0	0	-0.366377	7.966e-07	0	0	0	-0.301571	3.06175e-05	0	0	0	-0.301815	2.99413e-05	0	0	0	-0.279669	0.00012876	1	1	0	-0.310919	1.70715e-05	0	0	0	-0.312752	1.60241e-05	0	0	-0.297009	5.73425e-05	0	0	0	-0.3095	2.87488e-05	0
1-linoleoyl-GPA (18:2)*	X1.linoleoyl.GPA..18.2..	Lipid	Lysolipid	937	0.299293	0.0714231	3.04761e-05	0.306214	3.9002e-05	0	0	0	0.329869	7.5777e-06	0	0	0	0.295929	3.75908e-05	0	0	0	0.299464	3.03833e-05	0	0	0	0.287932	7.6087e-05	1	1	0	0.306167	1.94982e-05	0	0	0	0.306695	1.99567e-05	0	0	0.295671	5.28499e-05	0	0	0	0.330596	6.09615e-06	0
1,2-dilinoleoyl-GPC (18:2/18:2)	X1.2.dilinoleoyl.GPC..18.2.18.2.	Lipid	Phospholipid Metabolism	963	-0.303163	0.0725315	3.18397e-05	-0.235195	0.00169372	1	1	0	-0.28261	0.000155365	1	1	0	-0.301386	3.58347e-05	0	0	0	-0.302965	3.25437e-05	0	0	0	-0.301277	4.612e-05	0	0	0	-0.299867	3.92255e-05	0	0	0	-0.30439	3.08982e-05	0	0	-0.248588	0.000750251	1	1	0	-0.234593	0.00132242	1
3-hydroxy-2-ethylpropionate	X3.hydroxy.2.ethylpropionate	Amino Acid	Leucine, Isoleucine and Valine Metabolism	958	0.298664	0.0715004	3.22207e-05	0.287851	0.000109837	1	1	0	0.258671	0.000432923	1	1	0	0.297506	3.50402e-05	0	0	0	0.297154	3.45823e-05	0	0	0	0.325294	7.88517e-06	0	0	0	0.278651	7.08117e-05	1	1	0	0.266937	0.000133465	1	0	0.274128	0.000179894	1	1	0	0.276705	0.000148059	1
erucate (22:1n9)	erucate..22.1n9.	Lipid	Long Chain Fatty Acid	943	0.312854	0.0749624	3.27724e-05	0.338216	1.47268e-05	0	0	0	0.305443	7.80926e-05	1	1	0	0.313332	3.24146e-05	0	0	0	0.311286	3.53633e-05	0	0	0	0.3203	2.69865e-05	0	0	0	0.319375	2.2147e-05	0	0	0	0.316843	2.69628e-05	0	0	0.299364	9.93976e-05	1	1	0	0.320498	2.88565e-05	0
eicosenoate (20:1)	eicosenoate..20.1.	Lipid	Long Chain Fatty Acid	962	0.309327	0.0746794	3.74447e-05	0.340177	1.20712e-05	0	0	0	0.314787	4.38407e-05	0	0	0	0.308846	3.91278e-05	0	0	0	0.308062	3.97376e-05	0	0	0	0.308468	5.08388e-05	0	0	0	0.313033	3.05006e-05	0	0	0	0.306775	4.4935e-05	0	0	0.29896	9.48049e-05	1	1	0	0.317586	3.17945e-05	0
X - 18345	X...18345	NA	NA	867	0.316602	0.077154	4.45317e-05	0.270112	0.000713807	1	1	0	0.283686	0.000328459	1	1	0	0.313623	5.05046e-05	0	0	0	0.315256	4.82907e-05	0	0	0	0.322397	4.01118e-05	0	0	0	0.299523	8.7033e-05	1	1	0	0.274388	0.0002453	1	0	0.288476	0.000252575	1	1	0	0.288779	0.000256183	1
isovalerylglycine	isovalerylglycine	Amino Acid	Leucine, Isoleucine and Valine Metabolism	899	0.316692	0.0772248	4.48842e-05	0.299821	0.000188312	1	1	0	0.316487	7.37485e-05	1	1	0	0.315867	4.81573e-05	0	0	0	0.316518	4.57785e-05	0	0	0	0.314346	6.46591e-05	1	1	0	0.315421	4.94681e-05	0	0	0	0.304805	8.48329e-05	1	0	0.29503	0.00019031	1	1	0	0.31822	5.67067e-05	0
deoxycarnitine	deoxycarnitine	Lipid	Carnitine Metabolism	957	-0.283747	0.06929	4.57714e-05	-0.29376	4.65307e-05	0	0	0	-0.308056	1.61692e-05	0	0	0	-0.284965	4.29573e-05	0	0	0	-0.285481	4.06072e-05	0	0	0	-0.261007	0.000212202	1	1	0	-0.304127	7.42638e-06	0	0	0	-0.314399	3.81952e-06	0	0	-0.303126	1.949e-05	0	0	0	-0.303997	1.74988e-05	0
X - 11549	X...11549	NA	NA	956	-0.295513	0.0721759	4.59166e-05	-0.281163	0.000178041	1	1	0	-0.296667	6.60108e-05	1	1	0	-0.291645	5.7456e-05	0	0	0	-0.296548	4.30232e-05	0	0	0	-0.299516	4.64446e-05	0	0	0	-0.297082	4.28595e-05	0	0	0	-0.301704	3.25035e-05	0	0	-0.270999	0.000243071	1	1	0	-0.283122	0.000123018	1
3-methylglutaconate	X3.methylglutaconate	Amino Acid	Leucine, Isoleucine and Valine Metabolism	787	0.322523	0.0789014	4.80472e-05	0.278999	0.000680743	1	1	0	0.313078	0.00011937	1	1	0	0.31631	6.57368e-05	1	1	0	0.32207	4.99276e-05	0	0	0	0.331207	3.78469e-05	0	0	0	0.315149	6.94688e-05	1	1	0	0.305954	0.000109744	1	0	0.335688	3.32351e-05	0	0	0	0.310847	0.000115597	1
N-acetylarginine	N.acetylarginine	Amino Acid	Urea cycle; Arginine and Proline Metabolism	951	-0.296745	0.0727628	4.91735e-05	-0.35726	2.26233e-06	0	0	0	-0.341443	5.26417e-06	0	0	0	-0.297468	4.79327e-05	0	0	0	-0.29642	5.06113e-05	0	0	0	-0.276892	0.000183373	1	1	0	-0.316713	8.53818e-06	0	0	0	-0.331706	2.63798e-06	0	0	-0.300093	5.82097e-05	0	0	0	-0.308629	3.34027e-05	0
arginine	arginine	Amino Acid	Urea cycle; Arginine and Proline Metabolism	962	-0.292517	0.0718281	5.03454e-05	-0.31201	3.00627e-05	0	0	0	-0.308253	3.16037e-05	0	0	0	-0.292334	5.17368e-05	0	0	0	-0.292271	5.15867e-05	0	0	0	-0.307043	2.73384e-05	0	0	0	-0.297767	3.6639e-05	0	0	0	-0.301126	3.0374e-05	0	0	-0.28658	9.88673e-05	1	1	0	-0.267472	0.000260194	1
linolenate [alpha or gamma; (18:3n3 or 6)]	linolenate..alpha.or.gamma...18.3n3.or.6..	Lipid	Polyunsaturated Fatty Acid (n3 and n6)	963	0.298049	0.0740815	6.18949e-05	0.31187	5.24257e-05	1	0	1	0.314225	3.88982e-05	1	0	1	0.297607	6.44453e-05	1	0	0	0.297211	6.49531e-05	1	0	0	0.285164	0.000156678	1	0	0	0.303502	4.50767e-05	1	0	1	0.298654	6.22802e-05	1	0	0.306923	5.3242e-05	1	0	1	0.309188	4.44903e-05	1
X - 12450	X...12450	NA	NA	963	0.299927	0.0745669	6.2156e-05	0.320901	3.54853e-05	1	0	1	0.331576	1.58516e-05	1	0	1	0.299161	6.58386e-05	1	0	0	0.299358	6.4543e-05	1	0	0	0.292794	0.000116166	1	0	0	0.306329	4.25018e-05	1	0	1	0.301753	5.83506e-05	1	1	0.298009	9.67979e-05	1	0	0	0.308944	5.06036e-05	1
X - 21740	X...21740	NA	NA	920	-0.281688	0.0700379	6.2454e-05	-0.284363	9.12641e-05	1	1	0	-0.271481	0.00016399	1	0	0	-0.280551	6.74984e-05	1	0	0	-0.282242	5.82324e-05	1	0	1	-0.292868	4.08364e-05	1	0	1	-0.277271	7.94239e-05	1	0	0	-0.277659	8.19649e-05	1	0	-0.302691	2.36791e-05	1	0	1	-0.253511	0.000388783	1
1-oleoyl-2-linoleoyl-glycerol (18:1/18:2)	X1.oleoyl.2.linoleoyl.glycerol..18.1.18.2.	Lipid	Diacylglycerol	964	0.291944	0.0729103	6.70212e-05	0.276752	0.000262707	1	0	0	0.284646	0.00015238	1	0	0	0.287947	8.28989e-05	1	0	0	0.291687	6.86241e-05	1	0	0	0.283669	0.0001339	1	0	0	0.290388	7.47014e-05	1	0	0	0.281536	0.00011955	1	0	0.204491	0.00523852	1	0	0	0.326228	1.14783e-05	1
1-lignoceroyl-GPC (24:0)	X1.lignoceroyl.GPC..24.0.	Lipid	Lysolipid	781	-0.324422	0.0809952	6.78122e-05	-0.289269	0.000640116	1	0	0	-0.327877	8.53674e-05	1	0	0	-0.31848	9.3363e-05	1	0	0	-0.324298	6.8959e-05	1	0	0	-0.333118	5.5625e-05	1	0	1	-0.32895	5.42274e-05	1	0	1	-0.329732	5.10504e-05	1	1	-0.294018	0.000381	1	0	0	-0.26391	0.00134725	1
1-stearoyl-2-linoleoyl-GPE (18:0/18:2)*	X1.stearoyl.2.linoleoyl.GPE..18.0.18.2..	Lipid	Phospholipid Metabolism	962	0.299796	0.074942	6.80944e-05	0.313859	5.72109e-05	1	0	1	0.293914	0.000141729	1	0	0	0.29776	7.68384e-05	1	0	0	0.299035	7.13778e-05	1	0	0	0.297042	0.000100444	1	0	0	0.299107	7.22624e-05	1	0	0	0.296237	8.56918e-05	1	0	0.240655	0.00156826	1	0	0	0.341015	7.96723e-06	1
valine	valine	Amino Acid	Leucine, Isoleucine and Valine Metabolism	963	0.289254	0.0724372	7.01588e-05	0.272705	0.000294798	1	0	0	0.292978	8.78206e-05	1	0	0	0.290761	6.50994e-05	1	0	0	0.288109	7.44724e-05	1	0	0	0.279169	0.00015458	1	0	0	0.293385	5.5547e-05	1	0	1	0.279772	0.000119807	1	0	0.266163	0.000328354	1	0	0	0.302646	4.34352e-05	1
1-palmitoyl-GPC (16:0)	X1.palmitoyl.GPC..16.0.	Lipid	Lysolipid	962	-0.294074	0.0738086	7.27965e-05	-0.282418	0.000234596	1	0	0	-0.273117	0.000326534	1	0	0	-0.294402	7.24457e-05	1	0	0	-0.29299	7.70598e-05	1	0	0	-0.293397	9.61189e-05	1	0	0	-0.289112	9.59444e-05	1	0	0	-0.294675	7.3229e-05	1	0	-0.275777	0.000262969	1	0	0	-0.225589	0.00240467	1
methionine sulfone	methionine.sulfone	Amino Acid	Methionine, Cysteine, SAM and Taurine Metabolism	959	0.282145	0.0709529	7.51898e-05	0.236052	0.00132147	1	0	0	0.243679	0.000821591	1	0	0	0.279372	8.77062e-05	1	0	0	0.282291	7.52592e-05	1	0	0	0.302336	2.86006e-05	1	0	1	0.260107	0.000154505	1	0	0	0.247946	0.000296368	1	0	0.285742	8.55212e-05	1	0	0	0.249252	0.000555081	1
stearidonate (18:4n3)	stearidonate..18.4n3.	Lipid	Polyunsaturated Fatty Acid (n3 and n6)	954	0.296226	0.0747902	8.02713e-05	0.286311	0.000235597	1	0	0	0.3245	2.58213e-05	1	0	1	0.29635	8.09202e-05	1	0	0	0.2962	8.11606e-05	1	0	0	0.277909	0.000260375	1	0	0	0.303003	5.39983e-05	1	0	1	0.298762	7.28913e-05	1	0	0.307699	6.01689e-05	1	0	1	0.300014	8.68278e-05	1
X - 21286	X...21286	NA	NA	962	0.271693	0.0691627	9.16543e-05	0.284253	7.83952e-05	1	0	0	0.284461	6.62405e-05	1	0	0	0.267336	0.000115763	1	0	0	0.271539	9.33766e-05	1	0	0	0.252281	0.000335252	1	0	0	0.270429	0.000100729	1	0	0	0.268354	0.000115197	1	0	0.252942	0.000354762	1	0	0	0.275039	0.000100063	1
7-alpha-hydroxy-3-oxo-4-cholestenoate (7-Hoca)	X7.alpha.hydroxy.3.oxo.4.cholestenoate..7.Hoca.	Lipid	Sterol	958	-0.287873	0.0734443	9.50039e-05	-0.260149	0.000645993	1	0	0	-0.279603	0.000218575	1	0	0	-0.285263	0.000110962	1	0	0	-0.288684	9.0918e-05	1	0	0	-0.272598	0.000266071	1	0	0	-0.283853	0.000120298	1	0	0	-0.280234	0.000148057	1	0	-0.288827	0.000125381	1	0	0	-0.283103	0.000160425	1
X - 21736	X...21736	NA	NA	947	0.278792	0.0712821	9.8433e-05	0.287055	0.000107535	1	0	0	0.268545	0.000253841	1	0	0	0.278143	0.000103769	1	0	0	0.278729	9.96621e-05	1	0	0	0.300858	3.33458e-05	1	0	1	0.272821	0.000135248	1	0	0	0.260668	0.000241279	1	0	0.285636	9.25018e-05	1	0	0	0.237072	0.0010357	1
X - 02269	X...02269	NA	NA	962	-0.257962	0.0661783	0.000103718	-0.267165	0.000104859	1	0	0	-0.222938	0.00104886	1	0	0	-0.254681	0.000125611	1	0	0	-0.256881	0.00011011	1	0	0	-0.274976	4.49632e-05	1	0	1	-0.253557	0.000135017	1	0	0	-0.252597	0.000147225	1	0	-0.223058	0.000964158	1	0	0	-0.233969	0.000522934	1
2-oleoylglycerol (18:1)	X2.oleoylglycerol..18.1.	Lipid	Monoacylglycerol	940	0.283629	0.0734424	0.000120203	0.272781	0.000352705	1	0	0	0.262123	0.000530963	1	0	0	0.279406	0.000149888	1	0	0	0.284291	0.000116424	1	0	0	0.260766	0.000475015	1	0	0	0.286028	0.00010702	1	0	0	0.280474	0.000147603	1	0	0.203781	0.00589763	1	0	0	0.295858	8.01077e-05	1
5-methyluridine (ribothymidine)	X5.methyluridine..ribothymidine.	Nucleotide	Pyrimidine Metabolism, Uracil containing	963	-0.282614	0.0731906	0.000120296	-0.277774	0.00026382	1	0	0	-0.276807	0.000242501	1	0	0	-0.283712	0.000114663	1	0	0	-0.282898	0.000119397	1	0	0	-0.264503	0.00038141	1	0	0	-0.290636	7.36095e-05	1	0	0	-0.294839	5.89924e-05	1	1	-0.260314	0.000508153	1	0	0	-0.290011	0.00010553	1
acisoga	acisoga	Amino Acid	Polyamine Metabolism	933	0.280038	0.0725441	0.000121079	0.230821	0.00208033	1	0	0	0.243998	0.00103312	1	0	0	0.277168	0.000142544	1	0	0	0.27937	0.000126226	1	0	0	0.31298	2.13485e-05	1	0	1	0.261407	0.00019978	1	0	0	0.246875	0.000391954	1	0	0.266511	0.000324044	1	0	0	0.239757	0.00113161	1
tiglylcarnitine	tiglylcarnitine	Amino Acid	Leucine, Isoleucine and Valine Metabolism	771	0.323305	0.0839272	0.000126784	0.331189	0.000146121	1	0	0	0.294679	0.000634054	1	0	0	0.318981	0.000151082	1	0	0	0.323296	0.000128024	1	0	0	0.321694	0.000164056	1	0	0	0.304157	0.000245959	1	0	0	0.276442	0.000658846	1	0	0.311523	0.000324717	1	0	0	0.305896	0.00035598	1
aconitate [cis or trans]	aconitate..cis.or.trans.	Energy	TCA Cycle	947	0.277805	0.0721851	0.000126805	0.276548	0.000231751	1	0	0	0.247079	0.000859919	1	0	0	0.273256	0.000165445	1	0	0	0.277175	0.000131914	1	0	0	0.31067	2.26281e-05	1	0	1	0.250854	0.000307612	1	0	0	0.243664	0.000528153	1	0	0.291878	7.74235e-05	1	0	0	0.236875	0.00125135	1
isoleucine	isoleucine	Amino Acid	Leucine, Isoleucine and Valine Metabolism	961	0.279778	0.072714	0.000127127	0.258758	0.000620975	1	0	0	0.274737	0.000245552	1	0	0	0.28048	0.00012398	1	0	0	0.279134	0.000132311	1	0	0	0.273503	0.000224896	1	0	0	0.281997	0.000114275	1	0	0	0.270608	0.000209746	1	0	0.238174	0.00130977	1	0	0	0.274	0.00022723	1
X - 24438	X...24438	NA	NA	797	-0.311432	0.0812591	0.000136788	-0.245653	0.00342602	1	0	0	-0.266831	0.0014665	1	0	0	-0.310372	0.000144858	1	0	0	-0.311573	0.000135751	1	0	0	-0.301685	0.000271909	1	0	0	-0.310097	0.000149829	1	0	0	-0.31216	0.00013834	1	0	-0.248894	0.00259843	1	0	0	-0.249669	0.00234494	1
pyruvate	pyruvate	Carbohydrate	Glycolysis, Gluconeogenesis, and Pyruvate Metabolism	956	0.276249	0.0722365	0.00013968	0.252546	0.000765845	1	0	0	0.254664	0.000613188	1	0	0	0.273914	0.000159632	1	0	0	0.274785	0.000149162	1	0	0	0.284367	0.000111763	1	0	0	0.285957	7.48818e-05	1	0	0	0.289782	6.23494e-05	1	0	0.260431	0.00043169	1	0	0	0.286947	0.000101396	1
cortisol	cortisol	Lipid	Steroid	963	0.283594	0.0744144	0.000147181	0.330373	1.9164e-05	1	0	1	0.311432	4.82499e-05	1	0	1	0.284102	0.000145231	1	0	0	0.28264	0.000154837	1	0	0	0.299737	7.63574e-05	1	0	0	0.285263	0.000137563	1	0	0	0.284401	0.000146139	1	0	0.298825	9.00805e-05	1	0	0	0.283176	0.000195296	1
2-hydroxy-3-methylvalerate	X2.hydroxy.3.methylvalerate	Amino Acid	Leucine, Isoleucine and Valine Metabolism	952	0.27446	0.0721249	0.000150647	0.249122	0.000890928	1	0	0	0.257709	0.000517019	1	0	0	0.278308	0.000120535	1	0	0	0.273502	0.000158991	1	0	0	0.2814	0.000129677	1	0	0	0.274362	0.000154879	1	0	0	0.272081	0.000177811	1	0	0.242652	0.000981613	1	0	0	0.273438	0.000205678	1
X - 11470	X...11470	NA	NA	910	-0.27665	0.072757	0.000152862	-0.243991	0.0011791	1	0	0	-0.255837	0.000621313	1	0	0	-0.274477	0.000172676	1	0	0	-0.277059	0.000150128	1	0	0	-0.258298	0.000472703	1	0	0	-0.290484	6.07941e-05	1	0	0	-0.28707	8.67475e-05	1	0	-0.244582	0.000990076	1	0	0	-0.299201	5.48663e-05	1
sphingomyelin (d18:1/21:0, d17:1/22:0, d16:1/23:0)*	sphingomyelin..d18.1.21.0..d17.1.22.0..d16.1.23.0..	Lipid	Sphingolipid Metabolism	961	-0.279294	0.0740994	0.000173767	-0.270158	0.000452092	1	0	0	-0.245888	0.00124939	1	0	0	-0.275369	0.000210798	1	0	0	-0.278507	0.000181187	1	0	0	-0.28748	0.000139404	1	0	0	-0.27267	0.000243243	1	0	0	-0.283449	0.000143572	1	0	-0.223162	0.00306987	1	0	0	-0.183206	0.0129547	1
arachidate (20:0)	arachidate..20.0.	Lipid	Long Chain Fatty Acid	940	0.27867	0.0740624	0.000178536	0.302154	8.58868e-05	1	0	0	0.266763	0.000475221	1	0	0	0.276192	0.000204269	1	0	0	0.2779	0.000187282	1	0	0	0.281879	0.000181543	1	0	0	0.283694	0.000133993	1	0	0	0.283152	0.000143264	1	0	0.262893	0.000527583	1	0	0	0.307277	4.71675e-05	1
1-linoleoyl-2-arachidonoyl-GPC (18:2/20:4n6)*	X1.linoleoyl.2.arachidonoyl.GPC..18.2.20.4n6..	Lipid	Phospholipid Metabolism	957	-0.283013	0.0752311	0.000178861	-0.278689	0.000366841	1	0	0	-0.285206	0.000235874	1	0	0	-0.281825	0.00019267	1	0	0	-0.282273	0.000186347	1	0	0	-0.290816	0.000146792	1	0	0	-0.277737	0.000233797	1	0	0	-0.286715	0.000151998	1	0	-0.221621	0.00377292	1	0	0	-0.235774	0.00203111	1
2-piperidinone	X2.piperidinone	Xenobiotics	Food Component/Plant	922	0.28826	0.0769242	0.000189848	0.286906	0.000340691	1	0	0	0.265518	0.000766231	1	0	0	0.290586	0.00016847	1	0	0	0.287762	0.000196384	1	0	0	0.301798	0.000112538	1	0	0	0.283572	0.000246207	1	0	0	0.279759	0.000291971	1	0	0.269516	0.000612403	1	0	0	0.257142	0.00103806	1
sphinganine-1-phosphate	sphinganine.1.phosphate	Lipid	Sphingolipid Metabolism	938	-0.274588	0.073893	0.000214357	-0.305526	7.34211e-05	1	0	0	-0.286101	0.000173594	1	0	0	-0.275421	0.000207651	1	0	0	-0.27457	0.000215902	1	0	0	-0.302887	5.46095e-05	1	0	1	-0.267148	0.000305479	1	0	0	-0.268834	0.000295003	1	0	-0.265991	0.000427296	1	0	0	-0.24893	0.000931876	1
asparagine	asparagine	Amino Acid	Alanine and Aspartate Metabolism	958	-0.271338	0.0731221	0.000218543	-0.293979	0.000111874	1	0	0	-0.289915	0.00012108	1	0	0	-0.270347	0.000232783	1	0	0	-0.270593	0.000227981	1	0	0	-0.258736	0.000508789	1	0	0	-0.270241	0.000236211	1	0	0	-0.278085	0.000154968	1	0	-0.270356	0.000306655	1	0	0	-0.281089	0.000168416	1
1-dihomo-linoleoylglycerol (20:2)	X1.dihomo.linoleoylglycerol..20.2.	Lipid	Fatty Acid, Keto	858	0.283954	0.0764903	0.000218649	0.259658	0.00108594	1	0	0	0.284198	0.000307918	1	0	0	0.279927	0.000265803	1	0	0	0.284198	0.000218378	1	0	0	0.262607	0.000728003	1	0	0	0.284426	0.000219255	1	0	0	0.278429	0.000296964	1	0	0.244331	0.00170316	1	0	0	0.311657	6.14737e-05	1
1-palmitoyl-GPA (16:0)	X1.palmitoyl.GPA..16.0.	Lipid	Lysolipid	937	0.264957	0.0714332	0.000220174	0.255233	0.000606376	1	0	0	0.293677	6.74143e-05	1	0	0	0.263524	0.000240376	1	0	0	0.26487	0.000222922	1	0	0	0.266643	0.000247722	1	0	0	0.270498	0.000162679	1	0	0	0.267114	0.000204899	1	0	0.257554	0.000423042	1	0	0	0.299242	4.11976e-05	1
O-sulfo-L-tyrosine	O.sulfo.L.tyrosine	Xenobiotics	Chemical	944	-0.27634	0.0748301	0.000234431	-0.295784	0.000140543	1	0	0	-0.287478	0.000188117	1	0	0	-0.28225	0.000171199	1	0	0	-0.27647	0.000234772	1	0	0	-0.223834	0.00300489	1	0	0	-0.308127	4.88532e-06	1	0	1	-0.32036	6.4308e-06	1	1	-0.285576	0.000191365	1	0	0	-0.292875	0.000127183	1
oleate/vaccenate (18:1)	oleate.vaccenate..18.1.	Lipid	Long Chain Fatty Acid	964	0.272339	0.0742504	0.000257987	0.295755	0.000128184	1	0	0	0.285351	0.000192094	1	0	0	0.271657	0.000270685	1	0	0	0.270855	0.000274645	1	0	0	0.272171	0.000319525	1	0	0	0.276304	0.000211115	1	0	0	0.269657	0.0003057	1	0	0.264184	0.000513102	1	0	0	0.282799	0.000192567	1
glycosyl-N-stearoyl-sphingosine	glycosyl.N.stearoyl.sphingosine	Lipid	Sphingolipid Metabolism	956	-0.269352	0.073455	0.00025905	-0.22675	0.00287424	1	0	0	-0.232553	0.00204397	1	0	0	-0.264989	0.00032164	1	0	0	-0.268242	0.000273708	1	0	0	-0.254344	0.000666008	1	0	0	-0.265897	0.000313254	1	0	0	-0.265122	0.000332281	1	0	-0.239592	0.00140619	1	0	0	-0.197986	0.00737101	1
1-oleoyl-2-linoleoyl-GPE (18:1/18:2)*	X1.oleoyl.2.linoleoyl.GPE..18.1.18.2..	Lipid	Phospholipid Metabolism	934	0.278128	0.076033	0.000268409	0.284049	0.000331741	1	0	0	0.274362	0.000449152	1	0	0	0.275197	0.000310307	1	0	0	0.278252	0.000269362	1	0	0	0.278179	0.000329087	1	0	0	0.27733	0.000284243	1	0	0	0.270448	0.000399821	1	0	0.23905	0.00211033	1	0	0	0.293074	0.000161226	1
12-HETE	X12.HETE	Lipid	Eicosanoid	942	-0.253078	0.0694986	0.000285844	-0.251216	0.000509565	1	0	0	-0.250985	0.00046056	1	0	0	-0.25295	0.000292034	1	0	0	-0.252315	0.000298603	1	0	0	-0.243093	0.000590213	1	0	0	-0.248182	0.000370619	1	0	0	-0.246573	0.000417001	1	0	-0.253251	0.000381893	1	0	0	-0.224984	0.00148489	1
X - 23369	X...23369	NA	NA	954	0.261387	0.0721216	0.00030511	0.243039	0.00118574	1	0	0	0.258847	0.000495879	1	0	0	0.260422	0.000325531	1	0	0	0.260941	0.000314238	1	0	0	0.265137	0.000308102	1	0	0	0.244601	0.000609641	1	0	0	0.233447	0.00105265	1	0	0.260403	0.00041437	1	0	0	0.262675	0.000367179	1
alpha-ketoglutarate	alpha.ketoglutarate	Energy	TCA Cycle	944	0.262793	0.073098	0.000341093	0.214185	0.00468402	1	0	0	0.245953	0.00107749	1	0	0	0.258252	0.000422941	1	0	0	0.261925	0.000357	1	0	0	0.25043	0.000763498	1	0	0	0.264601	0.000315444	1	0	0	0.261775	0.000370991	1	0	0.253041	0.000716056	1	0	0	0.265875	0.000372491	1
cholate	cholate	Lipid	Primary Bile Acid Metabolism	916	-0.274065	0.0763183	0.000346819	-0.242333	0.00218741	1	0	0	-0.259539	0.00095702	1	0	0	-0.272239	0.000381846	1	0	0	-0.273709	0.000354077	1	0	0	-0.247776	0.00138121	1	0	0	-0.272384	0.000383375	1	0	0	-0.270853	0.000418575	1	0	-0.29043	0.000205446	1	0	0	-0.249387	0.00134449	1
X - 12729	X...12729	NA	NA	945	-0.261739	0.0734394	0.000383498	-0.287377	0.000162938	1	0	0	-0.276603	0.000249768	1	0	0	-0.267082	0.000284588	1	0	0	-0.261902	0.000382834	1	0	0	-0.249113	0.000851921	1	0	0	-0.290574	3.35263e-05	1	0	1	-0.297715	3.02468e-05	1	1	-0.258814	0.000557939	1	0	0	-0.278772	0.000199807	1
pentadecanoate (15:0)	pentadecanoate..15.0.	Lipid	Long Chain Fatty Acid	954	0.265528	0.074973	0.00041688	0.309632	7.03755e-05	1	0	0	0.285461	0.000222411	1	0	0	0.266991	0.000390362	1	0	0	0.263079	0.000459293	1	0	0	0.269642	0.000410838	1	0	0	0.26999	0.000335889	1	0	0	0.267976	0.000381065	1	0	0.250948	0.00108367	1	0	0	0.273636	0.000354765	1
X - 21364	X...21364	NA	NA	950	0.259349	0.0733204	0.000423936	0.275875	0.000290516	1	0	0	0.261472	0.000524078	1	0	0	0.260713	0.000399436	1	0	0	0.256652	0.000469252	1	0	0	0.286703	0.000118444	1	0	0	0.245668	0.000743898	1	0	0	0.238209	0.00106568	1	0	0.221638	0.00305752	1	0	0	0.249228	0.000860843	1
1-stearoyl-2-linoleoyl-GPC (18:0/18:2)*	X1.stearoyl.2.linoleoyl.GPC..18.0.18.2..	Lipid	Phospholipid Metabolism	963	-0.25978	0.0737952	0.000451267	-0.210243	0.00592389	1	0	0	-0.244866	0.00126698	1	0	0	-0.258376	0.000488798	1	0	0	-0.260762	0.000429085	1	0	0	-0.257497	0.000610155	1	0	0	-0.256141	0.000545102	1	0	0	-0.264338	0.000367058	1	0	-0.2155	0.00415742	1	0	0	-0.183046	0.013363	1
X - 24278	X...24278	NA	NA	961	0.259313	0.0736655	0.000451556	0.202024	0.00799399	1	0	0	0.237719	0.00171624	1	0	0	0.258236	0.000481137	1	0	0	0.258809	0.000465596	1	0	0	0.240216	0.00133344	1	0	0	0.261641	0.000407166	1	0	0	0.250693	0.00069752	1	0	0.218751	0.00361686	1	0	0	0.275644	0.000246014	1
X - 17340	X...17340	NA	NA	890	0.26233	0.0745478	0.000455195	0.284878	0.000224852	1	0	0	0.249813	0.00109468	1	0	0	0.260897	0.000493672	1	0	0	0.260157	0.000494466	1	0	0	0.279387	0.000225293	1	0	0	0.23994	0.00101366	1	0	0	0.231623	0.00152363	1	0	0.242322	0.00151016	1	0	0	0.245045	0.00125067	1
10-nonadecenoate (19:1n9)	X10.nonadecenoate..19.1n9.	Lipid	Long Chain Fatty Acid	962	0.261077	0.0746333	0.000489975	0.296997	0.000128422	1	0	0	0.286276	0.000195179	1	0	0	0.262354	0.000463321	1	0	0	0.259924	0.000515338	1	0	0	0.265806	0.000469335	1	0	0	0.265458	0.000395132	1	0	0	0.258576	0.000570676	1	0	0.253702	0.000900308	1	0	0	0.27089	0.000379873	1
X - 24261	X...24261	NA	NA	960	0.259248	0.0743053	0.000506921	0.190522	0.0129691	1	0	0	0.249968	0.00108572	1	0	0	0.259103	0.000516793	1	0	0	0.259157	0.000512756	1	0	0	0.237517	0.00165693	1	0	0	0.262326	0.000439415	1	0	0	0.25459	0.000652013	1	0	0.221836	0.00342953	1	0	0	0.266407	0.000450919	1
N-acetylisoleucine	N.acetylisoleucine	Amino Acid	Leucine, Isoleucine and Valine Metabolism	960	0.254038	0.073083	0.000531684	0.204012	0.00698323	1	0	0	0.224147	0.00286067	1	0	0	0.252755	0.000572876	1	0	0	0.252789	0.000558977	1	0	0	0.25739	0.000538863	1	0	0	0.242048	0.000885003	1	0	0	0.227198	0.0016372	1	0	0.216048	0.00373543	1	0	0	0.241353	0.00120726	1
alpha-hydroxyisovalerate	alpha.hydroxyisovalerate	Amino Acid	Leucine, Isoleucine and Valine Metabolism	959	0.250688	0.0721993	0.000539311	0.24254	0.00122858	1	0	0	0.238669	0.00132143	1	0	0	0.2552	0.000420073	1	0	0	0.2496	0.000567585	1	0	0	0.255514	0.000509576	1	0	0	0.252072	0.000510843	1	0	0	0.253271	0.00048634	1	0	0.235126	0.0014614	1	0	0	0.252617	0.000614814	1
N-acetylhistidine	N.acetylhistidine	Amino Acid	Histidine Metabolism	930	-0.254513	0.073585	0.00056728	-0.281963	0.000222492	1	0	0	-0.304581	5.58303e-05	1	0	1	-0.258702	0.000461524	1	0	0	-0.253964	0.000587415	1	0	0	-0.22356	0.00271638	1	0	0	-0.281606	5.29373e-05	1	0	1	-0.291204	4.24537e-05	1	1	-0.248564	0.000959962	1	0	0	-0.296056	7.84537e-05	1
X - 11787	X...11787	NA	NA	930	0.245322	0.0709816	0.000572767	0.254526	0.000574807	1	0	0	0.223593	0.0022068	1	0	0	0.244033	0.000619002	1	0	0	0.245146	0.00058155	1	0	0	0.250702	0.000509517	1	0	0	0.228399	0.00109925	1	0	0	0.205925	0.00286336	1	0	0.249078	0.000609353	1	0	0	0.224131	0.00194169	1
acetylcarnitine	acetylcarnitine	Lipid	Fatty Acid Metabolism(Acyl Carnitine)	956	0.254301	0.0737066	0.000584703	0.278987	0.000272478	1	0	0	0.253986	0.00082145	1	0	0	0.251786	0.000664212	1	0	0	0.25368	0.000606702	1	0	0	0.286898	0.000125016	1	0	0	0.240004	0.00103975	1	0	0	0.226908	0.00177262	1	0	0.22551	0.00273694	1	0	0	0.234627	0.00179821	1
beta-hydroxyisovalerate	beta.hydroxyisovalerate	Amino Acid	Leucine, Isoleucine and Valine Metabolism	958	0.247384	0.0717863	0.000593387	0.230214	0.0020354	1	0	0	0.202484	0.00599661	1	0	0	0.248687	0.00056024	1	0	0	0.245843	0.000629678	1	0	0	0.258408	0.000406994	1	0	0	0.235268	0.000974786	1	0	0	0.221664	0.00165526	1	0	0.226225	0.00207468	1	0	0	0.232997	0.00146629	1
gamma-glutamylphenylalanine	gamma.glutamylphenylalanine	Peptide	Gamma-glutamyl Amino Acid	958	0.232482	0.0676768	0.000617551	0.187036	0.00756346	1	0	0	0.22673	0.00114412	1	0	0	0.228847	0.000739003	1	0	0	0.23233	0.000624423	1	0	0	0.231638	0.000771619	1	0	0	0.217553	0.00113484	1	0	0	0.208342	0.0018325	1	0	0.206682	0.00275872	1	0	0	0.227459	0.00100389	1
N-acetylleucine	N.acetylleucine	Amino Acid	Leucine, Isoleucine and Valine Metabolism	956	0.246296	0.0721836	0.000671733	0.200686	0.00725735	1	0	0	0.216398	0.00356814	1	0	0	0.243889	0.000761253	1	0	0	0.245136	0.000710278	1	0	0	0.258711	0.000426171	1	0	0	0.237213	0.00101245	1	0	0	0.222722	0.00184836	1	0	0.221937	0.00263113	1	0	0	0.226844	0.00204748	1
10-heptadecenoate (17:1n7)	X10.heptadecenoate..17.1n7.	Lipid	Long Chain Fatty Acid	963	0.250848	0.0738727	0.000712544	0.266805	0.00051264	1	0	0	0.273415	0.000324268	1	0	0	0.250276	0.000740892	1	0	0	0.249855	0.000746492	1	0	0	0.251794	0.000813492	1	0	0	0.256362	0.000539714	1	0	0	0.251287	0.000718264	1	0	0.239753	0.00151918	1	0	0	0.25523	0.000715751	1
glucuronate	glucuronate	Carbohydrate	Aminosugar Metabolism	940	0.238664	0.0703281	0.00071869	0.216948	0.00299697	1	0	0	0.189884	0.00826194	1	0	0	0.23097	0.00104561	1	0	0	0.237488	0.000758876	1	0	0	0.262305	0.000242808	1	0	0	0.213245	0.00130208	1	0	0	0.200498	0.00292255	1	0	0.2348	0.00109276	1	0	0	0.191048	0.0072552	1
2-hydroxypalmitate	X2.hydroxypalmitate	Lipid	Fatty Acid, Monohydroxy	956	-0.251684	0.0745092	0.000759916	-0.242714	0.00172386	1	0	0	-0.241728	0.00162607	1	0	0	-0.249725	0.000840371	1	0	0	-0.251491	0.000772142	1	0	0	-0.242361	0.00138985	1	0	0	-0.249222	0.000866055	1	0	0	-0.248464	0.000909932	1	0	-0.241283	0.00155271	1	0	0	-0.194723	0.00967574	1
2-hydroxyhippurate (salicylurate)	X2.hydroxyhippurate..salicylurate.	Xenobiotics	Benzoate Metabolism	923	0.240975	0.0714196	0.000771487	0.120597	0.0956272	1	0	0	0.174942	0.0163823	1	0	0	0.23024	0.0012472	1	0	0	0.239054	0.000830066	1	0	0	0.167065	0.018474	1	0	0	0.231815	0.00107986	1	0	0	0.222378	0.00170627	1	0	0.227487	0.00188205	1	0	0	0.175068	0.0150584	1
tyramine O-sulfate	tyramine.O.sulfate	Amino Acid	Phenylalanine and Tyrosine Metabolism	807	0.276461	0.0821277	0.000798048	0.286512	0.000787091	1	0	0	0.268007	0.00147909	1	0	0	0.276013	0.000825713	1	0	0	0.279943	0.000676201	1	0	0	0.294482	0.000412393	1	0	0	0.271108	0.000933272	1	0	0	0.261906	0.00141931	1	0	0.264123	0.00166985	1	0	0	0.255604	0.00227291	1
dihomo-linolenate (20:3n3 or n6)	dihomo.linolenate..20.3n3.or.n6.	Lipid	Polyunsaturated Fatty Acid (n3 and n6)	960	-0.250005	0.074582	0.000833379	-0.221545	0.00419327	1	0	0	-0.227424	0.00301949	1	0	0	-0.248612	0.000899091	1	0	0	-0.249759	0.000848741	1	0	0	-0.258734	0.00065336	1	0	0	-0.23691	0.00142483	1	0	0	-0.240281	0.00132229	1	0	-0.244177	0.00137981	1	0	0	-0.195742	0.009406	1
indolepropionate	indolepropionate	Amino Acid	Tryptophan Metabolism	933	-0.247438	0.0749667	0.00100124	-0.299232	0.000122464	1	0	0	-0.257718	0.00086154	1	0	0	-0.24657	0.00105361	1	0	0	-0.24685	0.00103613	1	0	0	-0.226415	0.00297428	1	0	0	-0.253882	0.000733043	1	0	0	-0.248688	0.000972216	1	0	-0.237205	0.0019661	1	0	0	-0.248272	0.0012026	1
N6-succinyladenosine	N6.succinyladenosine	Nucleotide	Purine Metabolism, Adenine containing	939	0.23456	0.0718239	0.0011312	0.199656	0.00722973	1	0	0	0.216058	0.00340388	1	0	0	0.228949	0.00147304	1	0	0	0.234059	0.00116008	1	0	0	0.259846	0.00036799	1	0	0	0.213854	0.00130425	1	0	0	0.194288	0.00464293	1	0	0.226449	0.00203059	1	0	0	0.179354	0.0135357	1
X - 24748	X...24748	NA	NA	947	0.233825	0.0716203	0.00113475	0.204044	0.00598219	1	0	0	0.220148	0.00280974	1	0	0	0.240646	0.000789369	1	0	0	0.233142	0.00117024	1	0	0	0.220176	0.00248453	1	0	0	0.238687	0.000891954	1	0	0	0.230451	0.00136961	1	0	0.268309	0.000247428	1	0	0	0.215663	0.00315701	1
stearate (18:0)	stearate..18.0.	Lipid	Long Chain Fatty Acid	953	0.244335	0.0748594	0.00113794	0.273704	0.000429748	1	0	0	0.263945	0.000620717	1	0	0	0.244591	0.00113554	1	0	0	0.243623	0.00118098	1	0	0	0.244442	0.00132944	1	0	0	0.252192	0.000773315	1	0	0	0.246815	0.00104298	1	0	0.227372	0.00298397	1	0	0	0.2742	0.00032834	1
sphingosine 1-phosphate	sphingosine.1.phosphate	Lipid	Sphingolipid Metabolism	963	-0.238649	0.0734041	0.00118919	-0.258798	0.0006937	1	0	0	-0.242834	0.00131733	1	0	0	-0.23867	0.00120087	1	0	0	-0.238772	0.00119001	1	0	0	-0.249861	0.000823006	1	0	0	-0.232184	0.00159118	1	0	0	-0.23814	0.00125166	1	0	-0.244814	0.00112497	1	0	0	-0.210762	0.00479642	1
bilirubin (E,E)*	bilirubin..E.E..	Cofactors and Vitamins	Hemoglobin and Porphyrin Metabolism	956	-0.237499	0.0736068	0.00129533	-0.206541	0.0068333	1	0	0	-0.218748	0.00387443	1	0	0	-0.234167	0.00150146	1	0	0	-0.237786	0.00128565	1	0	0	-0.231834	0.00196673	1	0	0	-0.234633	0.00149591	1	0	0	-0.232692	0.00165461	1	0	-0.220061	0.00347935	1	0	0	-0.225262	0.00270559	1
taurocholenate sulfate	taurocholenate.sulfate	Lipid	Secondary Bile Acid Metabolism	956	-0.233284	0.0723739	0.00131003	-0.251397	0.00082417	1	0	0	-0.232337	0.00182055	1	0	0	-0.235668	0.00117241	1	0	0	-0.233222	0.00132271	1	0	0	-0.211365	0.00400582	1	0	0	-0.248196	0.000540071	1	0	0	-0.248138	0.000609343	1	0	-0.231115	0.00181352	1	0	0	-0.237547	0.00129582	1
1-oleoyl-2-linoleoyl-GPC (18:1/18:2)*	X1.oleoyl.2.linoleoyl.GPC..18.1.18.2..	Lipid	Phospholipid Metabolism	960	-0.23366	0.0734157	0.00150603	-0.197215	0.00957799	1	0	0	-0.228581	0.0024959	1	0	0	-0.231846	0.00164654	1	0	0	-0.233044	0.0015552	1	0	0	-0.223103	0.00281396	1	0	0	-0.232878	0.00158262	1	0	0	-0.241976	0.00102445	1	0	-0.170587	0.0219125	1	0	0	-0.193983	0.00921172	1
N-acetylthreonine	N.acetylthreonine	Amino Acid	Glycine, Serine and Threonine Metabolism	940	-0.233211	0.0732847	0.00150926	-0.251453	0.000957435	1	0	0	-0.253544	0.00076364	1	0	0	-0.234954	0.00140207	1	0	0	-0.233997	0.0014573	1	0	0	-0.202238	0.0065377	1	0	0	-0.251666	0.000139997	1	0	0	-0.275789	5.67974e-05	1	1	-0.252738	0.000732829	1	0	0	-0.285603	0.00012351	1
6-oxopiperidine-2-carboxylic acid	X6.oxopiperidine.2.carboxylic.acid	Amino Acid	Lysine Metabolism	946	0.227156	0.0721522	0.00169372	0.198571	0.00795322	1	0	0	0.171922	0.0197669	1	0	0	0.228504	0.00160739	1	0	0	0.227024	0.00170875	1	0	0	0.21997	0.00269963	1	0	0	0.215037	0.00266327	1	0	0	0.202914	0.00430987	1	0	0.21813	0.00308659	1	0	0	0.203587	0.00565065	1
X - 23765	X...23765	NA	NA	948	-0.219944	0.0701704	0.00177486	-0.223317	0.00220668	1	0	0	-0.216159	0.0027734	1	0	0	-0.218705	0.00189637	1	0	0	-0.219364	0.00183331	1	0	0	-0.206159	0.00386129	1	0	0	-0.22009	0.00178876	1	0	0	-0.214135	0.00237992	1	0	-0.168478	0.0180004	1	0	0	-0.20965	0.00339968	1
X - 17189	X...17189	NA	NA	947	-0.234221	0.0751997	0.00189703	-0.202841	0.00923286	1	0	0	-0.219883	0.00450902	1	0	0	-0.233326	0.00197857	1	0	0	-0.235395	0.00179235	1	0	0	-0.20519	0.00713519	1	0	0	-0.236933	0.00169651	1	0	0	-0.241727	0.00136855	1	0	-0.263824	0.000595167	1	0	0	-0.222352	0.00380214	1
1-linoleoyl-2-linolenoyl-GPC (18:2/18:3)*	X1.linoleoyl.2.linolenoyl.GPC..18.2.18.3..	Lipid	Phospholipid Metabolism	947	-0.225504	0.0731819	0.00211973	-0.173288	0.0220672	1	0	0	-0.195848	0.00915022	1	0	0	-0.226102	0.00208552	1	0	0	-0.22582	0.00210062	1	0	0	-0.231758	0.00185566	1	0	0	-0.220704	0.00262189	1	0	0	-0.22093	0.00264871	1	0	-0.176242	0.0180782	1	0	0	-0.1881	0.0114422	1
alanine	alanine	Amino Acid	Alanine and Aspartate Metabolism	959	0.226213	0.0738402	0.00224844	0.181004	0.0179408	1	0	0	0.221223	0.0036096	1	0	0	0.225172	0.00237559	1	0	0	0.226538	0.00222723	1	0	0	0.233821	0.00185915	1	0	0	0.233645	0.00157173	1	0	0	0.229522	0.00198143	1	0	0.222618	0.00321253	1	0	0	0.235945	0.00173122	1
N-acetylglutamate	N.acetylglutamate	Amino Acid	Glutamate Metabolism	954	0.225038	0.0734591	0.00224943	0.20275	0.00774546	1	0	0	0.212889	0.00486476	1	0	0	0.221377	0.00265168	1	0	0	0.223387	0.00239492	1	0	0	0.222804	0.00285528	1	0	0	0.214009	0.00346179	1	0	0	0.202764	0.00543206	1	0	0.233226	0.00189947	1	0	0	0.211949	0.0046822	1
X - 14658	X...14658	NA	NA	819	-0.248394	0.0810938	0.00226266	-0.261821	0.00194908	1	0	0	-0.25625	0.00223759	1	0	0	-0.252323	0.00191621	1	0	0	-0.246769	0.00242475	1	0	0	-0.224019	0.0065003	1	0	0	-0.263592	0.00109942	1	0	0	-0.270062	0.000840522	1	0	-0.227256	0.00642975	1	0	0	-0.276376	0.000820338	1
glycoursodeoxycholate	glycoursodeoxycholate	Lipid	Secondary Bile Acid Metabolism	957	-0.225554	0.0739239	0.00234245	-0.173391	0.0233173	1	0	0	-0.229667	0.00252957	1	0	0	-0.224926	0.00243096	1	0	0	-0.226658	0.0022248	1	0	0	-0.198407	0.00815981	1	0	0	-0.22558	0.00237217	1	0	0	-0.220797	0.00294655	1	0	-0.232469	0.0021311	1	0	0	-0.23102	0.00219359	1
pregnenolone sulfate	pregnenolone.sulfate	Lipid	Steroid	931	-0.205438	0.067498	0.00240317	-0.145491	0.0365108	1	0	0	-0.198923	0.00413609	1	0	0	-0.201435	0.00286048	1	0	0	-0.206469	0.00224857	1	0	0	-0.185234	0.00686336	1	0	0	-0.207	0.00224698	1	0	0	-0.212577	0.00168473	1	0	-0.178262	0.00983323	1	0	0	-0.195135	0.00456796	1
X - 17351	X...17351	NA	NA	789	0.239137	0.0785654	0.00241369	0.243662	0.00278651	1	0	0	0.233293	0.00390014	1	0	0	0.237664	0.00260871	1	0	0	0.238297	0.00249574	1	0	0	0.274073	0.000561919	1	0	0	0.207047	0.00600814	1	0	0	0.206745	0.00747538	1	0	0.247187	0.00208645	1	0	0	0.198868	0.0130667	1
linoleate (18:2n6)	linoleate..18.2n6.	Lipid	Polyunsaturated Fatty Acid (n3 and n6)	964	0.226262	0.0743917	0.00241779	0.263314	0.00065051	1	0	0	0.244193	0.0014267	1	0	0	0.225136	0.00256145	1	0	0	0.224918	0.002547	1	0	0	0.225254	0.00291965	1	0	0	0.231432	0.00191624	1	0	0	0.225996	0.00250584	1	0	0.22671	0.00290671	1	0	0	0.245746	0.001199	1
proline	proline	Amino Acid	Urea cycle; Arginine and Proline Metabolism	960	0.224785	0.0739423	0.00242991	0.206164	0.0072602	1	0	0	0.198758	0.00892191	1	0	0	0.224502	0.00248436	1	0	0	0.223074	0.00258249	1	0	0	0.242434	0.0012654	1	0	0	0.224356	0.00250449	1	0	0	0.218429	0.00323582	1	0	0.203799	0.00697937	1	0	0	0.220028	0.00354808	1
X - 17469	X...17469	NA	NA	838	0.231547	0.0762539	0.00246736	0.251467	0.00157203	1	0	0	0.235033	0.00269925	1	0	0	0.227824	0.00291039	1	0	0	0.23163	0.00246673	1	0	0	0.231914	0.0028162	1	0	0	0.238352	0.0018277	1	0	0	0.237093	0.00197566	1	0	0.225759	0.00381929	1	0	0	0.257292	0.00092744	1
X - 14056	X...14056	NA	NA	959	-0.220112	0.0725162	0.0024674	-0.237843	0.00160317	1	0	0	-0.24504	0.00102323	1	0	0	-0.220435	0.00245491	1	0	0	-0.221681	0.00226561	1	0	0	-0.225975	0.00219722	1	0	0	-0.211076	0.00356664	1	0	0	-0.212243	0.00352703	1	0	-0.248244	0.000807968	1	0	0	-0.210431	0.00443978	1
taurocholate	taurocholate	Lipid	Primary Bile Acid Metabolism	908	-0.230335	0.0766947	0.00274422	-0.229194	0.00396476	1	0	0	-0.235321	0.00285442	1	0	0	-0.23138	0.00264268	1	0	0	-0.230483	0.00273841	1	0	0	-0.224103	0.0040734	1	0	0	-0.230556	0.00274148	1	0	0	-0.232998	0.00249566	1	0	-0.209871	0.00723508	1	0	0	-0.229684	0.00337112	1
X - 21792	X...21792	NA	NA	906	-0.231928	0.0772774	0.00276252	-0.220417	0.00592968	1	0	0	-0.229206	0.00391625	1	0	0	-0.230387	0.00297996	1	0	0	-0.231676	0.00280485	1	0	0	-0.22097	0.00479296	1	0	0	-0.247501	0.00127712	1	0	0	-0.251464	0.00109361	1	0	-0.233297	0.00314588	1	0	0	-0.259787	0.000958865	1
X - 12686	X...12686	NA	NA	862	-0.231106	0.0770098	0.00276852	-0.259237	0.0011953	1	0	0	-0.278814	0.000430689	1	0	0	-0.23418	0.00244884	1	0	0	-0.232469	0.00262399	1	0	0	-0.195731	0.0120971	1	0	0	-0.271348	0.000145938	1	0	0	-0.270988	0.000231706	1	0	-0.239468	0.00238283	1	0	0	-0.267664	0.000653243	1
1-oleoyl-3-linoleoyl-glycerol (18:1/18:2)	X1.oleoyl.3.linoleoyl.glycerol..18.1.18.2.	Lipid	Diacylglycerol	964	0.219987	0.0733655	0.00278272	0.208427	0.0062329	1	0	0	0.218184	0.00386317	1	0	0	0.216935	0.0031802	1	0	0	0.219693	0.00283351	1	0	0	0.211705	0.00454803	1	0	0	0.219361	0.00289793	1	0	0	0.210789	0.00416313	1	0	0.13757	0.0622605	1	0	0	0.264496	0.000386806	1
N1-methyladenosine	N1.methyladenosine	Nucleotide	Purine Metabolism, Adenine containing	950	-0.222575	0.0743252	0.00281918	-0.267969	0.0005016	1	0	0	-0.258456	0.000708149	1	0	0	-0.22243	0.00286226	1	0	0	-0.222971	0.00277086	1	0	0	-0.194044	0.00996213	1	0	0	-0.246703	0.000569782	1	0	0	-0.257408	0.000385171	1	0	-0.225004	0.00305005	1	0	0	-0.274541	0.000267988	1
orotate	orotate	Nucleotide	Pyrimidine Metabolism, Orotate containing	940	-0.221404	0.0740391	0.00285914	-0.218771	0.00452652	1	0	0	-0.228625	0.00270797	1	0	0	-0.225278	0.0023981	1	0	0	-0.221609	0.00285515	1	0	0	-0.208145	0.00562572	1	0	0	-0.228221	0.00202891	1	0	0	-0.230328	0.00192356	1	0	-0.238878	0.00163296	1	0	0	-0.23346	0.00200606	1
1-(1-enyl-stearoyl)-2-oleoyl-GPE (P-18:0/18:1)	X1..1.enyl.stearoyl..2.oleoyl.GPE..P.18.0.18.1.	Lipid	Plasmalogen	953	0.221464	0.0744621	0.00301174	0.218048	0.00483413	1	0	0	0.224914	0.00332623	1	0	0	0.226026	0.00244633	1	0	0	0.221803	0.00297484	1	0	0	0.20049	0.00797093	1	0	0	0.230555	0.0019293	1	0	0	0.21708	0.0036971	1	0	0.277194	0.000255191	1	0	0	0.256536	0.000714041	1
3-ureidopropionate	X3.ureidopropionate	Nucleotide	Pyrimidine Metabolism, Uracil containing	945	0.217268	0.0731196	0.00303943	0.233151	0.00210388	1	0	0	0.223764	0.00292656	1	0	0	0.217515	0.00303411	1	0	0	0.215159	0.00323586	1	0	0	0.213356	0.00409415	1	0	0	0.215513	0.00332221	1	0	0	0.21567	0.00332485	1	0	0.201419	0.00694362	1	0	0	0.216242	0.0037304	1
caffeic acid sulfate	caffeic.acid.sulfate	Xenobiotics	Xanthine Metabolism	881	0.224453	0.0758778	0.00317833	0.197289	0.0113941	1	0	0	0.202224	0.00931979	1	0	0	0.21723	0.00426212	1	0	0	0.223298	0.00333215	1	0	0	0.227989	0.00306007	1	0	0	0.21604	0.0042105	1	0	0	0.204818	0.0064827	1	0	0.211601	0.00642246	1	0	0	0.223873	0.00388614	1
tryptophan betaine	tryptophan.betaine.	Amino Acid	Tryptophan Metabolism	954	-0.20338	0.0691274	0.00333871	-0.20081	0.00519727	1	0	0	-0.204845	0.00400393	1	0	0	-0.203114	0.00341048	1	0	0	-0.202775	0.00344286	1	0	0	-0.200755	0.00431159	1	0	0	-0.202777	0.00347178	1	0	0	-0.204076	0.00330676	1	0	-0.224581	0.00150569	1	0	0	-0.18709	0.0079171	1
2-aminoheptanoate	X2.aminoheptanoate	Lipid	Fatty Acid, Amino	949	0.217693	0.0740988	0.0033846	0.185017	0.0158431	1	0	0	0.200168	0.00853555	1	0	0	0.213545	0.00405001	1	0	0	0.217307	0.003435	1	0	0	0.209846	0.0053448	1	0	0	0.205024	0.00521001	1	0	0	0.198869	0.00686967	1	0	0.209054	0.00575748	1	0	0	0.188547	0.0122845	1
pantothenate	pantothenate	Cofactors and Vitamins	Pantothenate and CoA Metabolism	946	0.207579	0.0711832	0.00362771	0.206661	0.0052263	1	0	0	0.193525	0.00823024	1	0	0	0.203326	0.00431049	1	0	0	0.206654	0.00378713	1	0	0	0.220829	0.00229288	1	0	0	0.196233	0.00549017	1	0	0	0.178528	0.0105022	1	0	0.196837	0.00693561	1	0	0	0.185002	0.0107645	1
X - 23782	X...23782	NA	NA	935	0.210978	0.0724824	0.00369126	0.194719	0.0096131	1	0	0	0.228139	0.002224	1	0	0	0.209695	0.0039455	1	0	0	0.210831	0.00373371	1	0	0	0.200498	0.00649139	1	0	0	0.208169	0.00419206	1	0	0	0.203618	0.00509209	1	0	0.232988	0.00164832	1	0	0	0.204758	0.00560655	1
4-imidazoleacetate	X4.imidazoleacetate	Amino Acid	Histidine Metabolism	795	0.236988	0.0814385	0.00371485	0.250344	0.00311676	1	0	0	0.245949	0.00343247	1	0	0	0.235488	0.00400327	1	0	0	0.236756	0.00376461	1	0	0	0.223448	0.00687843	1	0	0	0.222494	0.00626117	1	0	0	0.225703	0.00572558	1	0	0.228157	0.00631741	1	0	0	0.189457	0.0213371	1
X - 14568	X...14568	NA	NA	964	-0.218401	0.0752694	0.00379716	-0.209362	0.0074049	1	0	0	-0.230388	0.00294047	1	0	0	-0.215764	0.00424783	1	0	0	-0.219619	0.00359156	1	0	0	-0.199733	0.00899131	1	0	0	-0.219443	0.00367782	1	0	0	-0.225749	0.00280651	1	0	-0.216738	0.00489316	1	0	0	-0.215524	0.00500441	1
X - 23749	X...23749	NA	NA	955	-0.201048	0.069922	0.00412595	-0.191816	0.00822202	1	0	0	-0.210991	0.0033778	1	0	0	-0.199128	0.00450723	1	0	0	-0.200859	0.00418211	1	0	0	-0.200568	0.00480637	1	0	0	-0.197551	0.00484627	1	0	0	-0.198198	0.00478011	1	0	-0.125691	0.0741717	1	0	0	-0.156366	0.0273226	1
1-myristoylglycerol (14:0)	X1.myristoylglycerol..14.0.	Lipid	Monoacylglycerol	942	0.211515	0.0739691	0.00433673	0.219754	0.00420228	1	0	0	0.205526	0.0069473	1	0	0	0.208134	0.00499644	1	0	0	0.211447	0.00437291	1	0	0	0.191875	0.0105714	1	0	0	0.216484	0.00350592	1	0	0	0.215882	0.00366861	1	0	0.136598	0.0668023	1	0	0	0.237129	0.00165044	1
hexadecanedioate	hexadecanedioate	Lipid	Fatty Acid, Dicarboxylate	954	0.21015	0.0738467	0.00452542	0.256116	0.000819968	1	0	0	0.200049	0.00845832	1	0	0	0.209325	0.00472093	1	0	0	0.209806	0.00461346	1	0	0	0.235166	0.00171479	1	0	0	0.211543	0.00431879	1	0	0	0.210714	0.0045135	1	0	0.197077	0.0091005	1	0	0	0.211033	0.00508618	1
dihomo-linoleate (20:2n6)	dihomo.linoleate..20.2n6.	Lipid	Polyunsaturated Fatty Acid (n3 and n6)	959	0.211787	0.0746794	0.00466498	0.239512	0.00202326	1	0	0	0.221267	0.00400342	1	0	0	0.212095	0.0046398	1	0	0	0.210668	0.00486234	1	0	0	0.2136	0.0049315	1	0	0	0.216515	0.00382917	1	0	0	0.20986	0.0051497	1	0	0.204234	0.00753849	1	0	0	0.226544	0.00291983	1
1-linolenoylglycerol (18:3)	X1.linolenoylglycerol..18.3.	Lipid	Monoacylglycerol	910	0.213436	0.075872	0.00501219	0.180344	0.0216985	1	0	0	0.197461	0.0112979	1	0	0	0.211863	0.00537989	1	0	0	0.213026	0.00510513	1	0	0	0.188198	0.014429	1	0	0	0.215966	0.00453173	1	0	0	0.21079	0.00567712	1	0	0.143631	0.0611699	1	0	0	0.235114	0.00236943	1
2-aminobutyrate	X2.aminobutyrate	Amino Acid	Methionine, Cysteine, SAM and Taurine Metabolism	959	0.208476	0.0742915	0.00511463	0.204276	0.00815759	1	0	0	0.207619	0.0066373	1	0	0	0.212326	0.00433425	1	0	0	0.207878	0.0052682	1	0	0	0.201514	0.0076576	1	0	0	0.224978	0.00213984	1	0	0	0.21591	0.0037631	1	0	0.216279	0.0044546	1	0	0	0.227357	0.00266348	1
X - 23314	X...23314	NA	NA	865	-0.216753	0.0773436	0.00518471	-0.229214	0.00428262	1	0	0	-0.222259	0.00522763	1	0	0	-0.220082	0.00455613	1	0	0	-0.215167	0.00548172	1	0	0	-0.213225	0.00653035	1	0	0	-0.226351	0.00349365	1	0	0	-0.223028	0.00413966	1	0	-0.219207	0.00565462	1	0	0	-0.247792	0.00170705	1
1-methylhistidine	X1.methylhistidine	Amino Acid	Histidine Metabolism	948	-0.197309	0.0710166	0.00557154	-0.219097	0.00296603	1	0	0	-0.237657	0.00110494	1	0	0	-0.20097	0.00475396	1	0	0	-0.197651	0.00551207	1	0	0	-0.174569	0.0154121	1	0	0	-0.231886	0.000273681	1	0	0	-0.262463	3.93923e-05	1	1	-0.209181	0.00393385	1	0	0	-0.242628	0.000762159	1
2-hydroxydecanoate	X2.hydroxydecanoate	Lipid	Fatty Acid, Monohydroxy	953	-0.200001	0.0721332	0.00566846	-0.174245	0.019697	1	0	0	-0.208834	0.00494979	1	0	0	-0.198406	0.00608967	1	0	0	-0.200392	0.00559711	1	0	0	-0.186898	0.0107553	1	0	0	-0.209108	0.00369126	1	0	0	-0.207806	0.00407149	1	0	-0.199967	0.00672239	1	0	0	-0.210827	0.00414287	1
X - 11441	X...11441	NA	NA	954	-0.196265	0.0710836	0.00587223	-0.199748	0.00682749	1	0	0	-0.191612	0.00878109	1	0	0	-0.195462	0.00612184	1	0	0	-0.195598	0.00605791	1	0	0	-0.179417	0.012911	1	0	0	-0.198589	0.00536104	1	0	0	-0.199628	0.00517435	1	0	-0.196912	0.00674351	1	0	0	-0.206713	0.00434722	1
uridine	uridine	Nucleotide	Pyrimidine Metabolism, Uracil containing	963	-0.202125	0.0733828	0.00599105	-0.194111	0.0108568	1	0	0	-0.191599	0.0111406	1	0	0	-0.199032	0.00679497	1	0	0	-0.202354	0.0059617	1	0	0	-0.193879	0.00935552	1	0	0	-0.199364	0.00675952	1	0	0	-0.202083	0.00612282	1	0	-0.186974	0.0126874	1	0	0	-0.191218	0.0105914	1
X - 16654	X...16654	NA	NA	814	0.21862	0.0797979	0.00628472	0.259914	0.00182208	1	0	0	0.221171	0.00710462	1	0	0	0.219664	0.00609947	1	0	0	0.218788	0.00619241	1	0	0	0.240635	0.00312006	1	0	0	0.222407	0.00536759	1	0	0	0.221772	0.00567235	1	0	0.191964	0.0182519	1	0	0	0.226455	0.0053486	1
N-acetylcitrulline	N.acetylcitrulline	Amino Acid	Urea cycle; Arginine and Proline Metabolism	928	-0.20218	0.0739054	0.00634444	-0.229856	0.00277535	1	0	0	-0.229912	0.00249681	1	0	0	-0.20574	0.00549067	1	0	0	-0.201818	0.00646592	1	0	0	-0.182134	0.0152272	1	0	0	-0.226685	0.00150279	1	0	0	-0.240119	0.000729526	1	0	-0.225258	0.00284915	1	0	0	-0.236459	0.00169462	1
1-linoleoylglycerol (18:2)	X1.linoleoylglycerol..18.2.	Lipid	Monoacylglycerol	951	0.199754	0.0731967	0.00646994	0.172969	0.0227469	1	0	0	0.187485	0.0127046	1	0	0	0.197985	0.00695999	1	0	0	0.199585	0.00654614	1	0	0	0.178645	0.0161754	1	0	0	0.204669	0.00530461	1	0	0	0.192999	0.00858302	1	0	0.141399	0.0567876	1	0	0	0.229074	0.00212565	1
5-hydroxyhexanoate	X5.hydroxyhexanoate	Lipid	Fatty Acid, Monohydroxy	807	0.203113	0.0744024	0.00647295	0.199846	0.0103569	1	0	0	0.195939	0.0104386	1	0	0	0.198383	0.00779149	1	0	0	0.203165	0.00649604	1	0	0	0.195071	0.0100876	1	0	0	0.188931	0.0106919	1	0	0	0.186972	0.0118977	1	0	0.189399	0.0132868	1	0	0	0.203353	0.00744419	1
4-androsten-3beta,17beta-diol disulfate (1)	X4.androsten.3beta.17beta.diol.disulfate..1.	Lipid	Steroid	960	0.194687	0.0715642	0.00663713	0.22748	0.00218793	1	0	0	0.206446	0.00504897	1	0	0	0.198273	0.00563854	1	0	0	0.192713	0.00702115	1	0	0	0.214662	0.00315089	1	0	0	0.194124	0.00686661	1	0	0	0.18992	0.0081908	1	0	0.166284	0.0227398	1	0	0	0.224339	0.00205933	1
succinylcarnitine	succinylcarnitine	Energy	TCA Cycle	893	0.193891	0.0713262	0.00668752	0.165792	0.0249175	1	0	0	0.17322	0.0177683	1	0	0	0.187858	0.00842215	1	0	0	0.193383	0.00686079	1	0	0	0.196756	0.00663462	1	0	0	0.165111	0.0153344	1	0	0	0.157566	0.0214947	1	0	0.163038	0.0244935	1	0	0	0.161364	0.02689	1
X - 12007	X...12007	NA	NA	862	0.207018	0.0765348	0.00696769	0.173208	0.0294894	1	0	0	0.153514	0.0496897	1	0	0	0.205479	0.00743123	1	0	0	0.206485	0.00715018	1	0	0	0.205527	0.00825743	1	0	0	0.189358	0.0120034	1	0	0	0.183784	0.0145215	1	0	0.191637	0.0143908	1	0	0	0.174277	0.0253459	1
homocitrulline	homocitrulline	Amino Acid	Urea cycle; Arginine and Proline Metabolism	937	0.197121	0.0730631	0.00710192	0.148763	0.0484134	1	0	0	0.153095	0.0406067	1	0	0	0.193614	0.00821739	1	0	0	0.196942	0.00716393	1	0	0	0.222124	0.00271202	1	0	0	0.176997	0.0123734	1	0	0	0.159165	0.0224382	1	0	0.179656	0.015904	1	0	0	0.164874	0.0267642	1
2-aminoadipate	X2.aminoadipate	Amino Acid	Lysine Metabolism	937	0.185491	0.0688812	0.00720961	0.13328	0.0611523	1	0	0	0.163688	0.0204301	1	0	0	0.186301	0.00699199	1	0	0	0.185113	0.00732799	1	0	0	0.168422	0.0161123	1	0	0	0.181001	0.00870875	1	0	0	0.169374	0.0134633	1	0	0.147124	0.0356863	1	0	0	0.177819	0.0111806	1
pregn steroid monosulfate*	pregn.steroid.monosulfate.	Lipid	Steroid	964	-0.178682	0.0664992	0.00733426	-0.132202	0.054569	1	0	0	-0.165321	0.0156205	1	0	0	-0.173974	0.00888828	1	0	0	-0.179909	0.0068981	1	0	0	-0.165183	0.0144823	1	0	0	-0.17653	0.00813524	1	0	0	-0.182743	0.00620438	1	0	-0.163915	0.0158813	1	0	0	-0.160353	0.0178994	1
1-palmitoleoylglycerol (16:1)*	X1.palmitoleoylglycerol..16.1..	Lipid	Monoacylglycerol	950	0.194807	0.0726368	0.00744687	0.163111	0.030232	1	0	0	0.188712	0.0115736	1	0	0	0.194521	0.00758314	1	0	0	0.194978	0.00742936	1	0	0	0.173455	0.0186281	1	0	0	0.201141	0.00568626	1	0	0	0.193616	0.00797555	1	0	0.119479	0.102299	1	0	0	0.21449	0.00376522	1
dimethylglycine	dimethylglycine	Amino Acid	Glycine, Serine and Threonine Metabolism	956	-0.192731	0.0718681	0.00745052	-0.239469	0.00132539	1	0	0	-0.232305	0.00165349	1	0	0	-0.195735	0.00654336	1	0	0	-0.194573	0.00679331	1	0	0	-0.179828	0.0138128	1	0	0	-0.206605	0.00354759	1	0	0	-0.22012	0.0016824	1	0	-0.234306	0.00139984	1	0	0	-0.218596	0.00281233	1
ornithine	ornithine	Amino Acid	Urea cycle; Arginine and Proline Metabolism	954	-0.188661	0.070509	0.007585	-0.201746	0.00586076	1	0	0	-0.166876	0.0211847	1	0	0	-0.189309	0.00743419	1	0	0	-0.18858	0.00764682	1	0	0	-0.186789	0.00918889	1	0	0	-0.193975	0.00602233	1	0	0	-0.204169	0.00371131	1	0	-0.20438	0.00458158	1	0	0	-0.170834	0.0173745	1
X - 23637	X...23637	NA	NA	956	0.185226	0.0692637	0.00761826	0.158254	0.0277314	1	0	0	0.200065	0.00497021	1	0	0	0.186419	0.00729554	1	0	0	0.185415	0.00759383	1	0	0	0.190056	0.00696692	1	0	0	0.191703	0.00571733	1	0	0	0.193276	0.00538118	1	0	0.188384	0.00783291	1	0	0	0.213416	0.00248165	1
4-allylphenol sulfate	X4.allylphenol.sulfate	Xenobiotics	Food Component/Plant	959	0.186844	0.0699345	0.00767477	0.194837	0.00734879	1	0	0	0.181848	0.0115353	1	0	0	0.1864	0.00788665	1	0	0	0.186185	0.00790467	1	0	0	0.180674	0.011041	1	0	0	0.177281	0.0110171	1	0	0	0.17029	0.0145156	1	0	0.198297	0.00555213	1	0	0	0.157304	0.0270536	1
X - 21343	X...21343	NA	NA	964	0.200187	0.0749504	0.00769166	0.225207	0.00380265	1	0	0	0.211641	0.00606194	1	0	0	0.20171	0.00728247	1	0	0	0.200075	0.00776104	1	0	0	0.201888	0.00807867	1	0	0	0.208584	0.00537188	1	0	0	0.208549	0.00553281	1	0	0.220892	0.00394436	1	0	0	0.208285	0.00643497	1
gamma-carboxyglutamate	gamma.carboxyglutamate	Amino Acid	Glutamate Metabolism	831	0.208627	0.0784931	0.00801405	0.187884	0.0205777	1	0	0	0.178677	0.026189	1	0	0	0.203545	0.00966682	1	0	0	0.208833	0.00799056	1	0	0	0.227354	0.00424274	1	0	0	0.155675	0.0299038	1	0	0	0.149561	0.0421057	1	0	0.197089	0.0136222	1	0	0	0.139699	0.0787923	1
etiocholanolone glucuronide	etiocholanolone.glucuronide	Lipid	Steroid	906	0.199441	0.0750777	0.00803528	0.21396	0.00592469	1	0	0	0.201711	0.00893019	1	0	0	0.200854	0.00765772	1	0	0	0.19738	0.0085689	1	0	0	0.215481	0.00464773	1	0	0	0.179684	0.0139748	1	0	0	0.168886	0.0219334	1	0	0.206093	0.00725902	1	0	0	0.20239	0.00815454	1
X - 22764	X...22764	NA	NA	961	0.199214	0.0750089	0.00804136	0.235344	0.002489	1	0	0	0.222996	0.00383789	1	0	0	0.201759	0.00728647	1	0	0	0.198826	0.00819551	1	0	0	0.207534	0.00650581	1	0	0	0.206773	0.00585755	1	0	0	0.205113	0.0064523	1	0	0.216933	0.00466356	1	0	0	0.20893	0.00631581	1
dimethylarginine (SDMA + ADMA)	dimethylarginine..SDMA...ADMA.	Amino Acid	Urea cycle; Arginine and Proline Metabolism	951	-0.196345	0.0745962	0.00862326	-0.211943	0.00620224	1	0	0	-0.21477	0.00508293	1	0	0	-0.197006	0.00847284	1	0	0	-0.197651	0.00812544	1	0	0	-0.177069	0.0193709	1	0	0	-0.215658	0.00308154	1	0	0	-0.232157	0.00135991	1	0	-0.205171	0.00706116	1	0	0	-0.219096	0.00394814	1
N-acetylvaline	N.acetylvaline	Amino Acid	Leucine, Isoleucine and Valine Metabolism	952	0.189772	0.0723613	0.00886642	0.151201	0.0435097	1	0	0	0.16657	0.0249963	1	0	0	0.186696	0.0100208	1	0	0	0.188356	0.00931839	1	0	0	0.205765	0.00510731	1	0	0	0.168766	0.0160968	1	0	0	0.150194	0.0309842	1	0	0.171433	0.0201134	1	0	0	0.156152	0.0336651	1
docosapentaenoate (n6 DPA; 22:5n6)	docosapentaenoate..n6.DPA..22.5n6.	Lipid	Polyunsaturated Fatty Acid (n3 and n6)	961	-0.194467	0.0751304	0.00978822	-0.205918	0.00832794	1	0	0	-0.19815	0.0103725	1	0	0	-0.192335	0.0106337	1	0	0	-0.194886	0.00966417	1	0	0	-0.196708	0.0100359	1	0	0	-0.182582	0.0146567	1	0	0	-0.193689	0.0102651	1	0	-0.189111	0.0138199	1	0	0	-0.172001	0.0245105	1
X - 18249	X...18249	NA	NA	956	-0.191521	0.0740593	0.00985529	-0.184286	0.0164559	1	0	0	-0.158223	0.037419	1	0	0	-0.183592	0.0130847	1	0	0	-0.190452	0.0102528	1	0	0	-0.193033	0.0103296	1	0	0	-0.175918	0.0159487	1	0	0	-0.171429	0.0199926	1	0	-0.162462	0.0316211	1	0	0	-0.160796	0.0326246	1
X - 24054	X...24054	NA	NA	960	-0.189068	0.0731477	0.00989186	-0.141246	0.0619709	1	0	0	-0.174106	0.0205848	1	0	0	-0.18487	0.011574	1	0	0	-0.189429	0.00979191	1	0	0	-0.207711	0.00520068	1	0	0	-0.185296	0.0114997	1	0	0	-0.196068	0.00755327	1	0	-0.114886	0.119154	1	0	0	-0.148218	0.0457388	1
3-methyl-2-oxovalerate	X3.methyl.2.oxovalerate	Amino Acid	Leucine, Isoleucine and Valine Metabolism	962	0.191469	0.0741092	0.0099237	0.182105	0.0179637	1	0	0	0.190927	0.0122355	1	0	0	0.194252	0.0089109	1	0	0	0.189836	0.0104227	1	0	0	0.192556	0.0106161	1	0	0	0.203406	0.00586336	1	0	0	0.194112	0.00911092	1	0	0.16878	0.0257884	1	0	0	0.195474	0.00976009	1
X - 24472	X...24472	NA	NA	946	-0.182251	0.0706761	0.010068	-0.194115	0.00819122	1	0	0	-0.215052	0.00304869	1	0	0	-0.184365	0.00923923	1	0	0	-0.18333	0.00960077	1	0	0	-0.154061	0.0314439	1	0	0	-0.21181	0.00137553	1	0	0	-0.21764	0.00130345	1	0	-0.183189	0.0112415	1	0	0	-0.211617	0.00326072	1
2-methylcitrate/homocitrate	X2.methylcitrate.homocitrate	Energy	TCA Cycle	846	-0.199631	0.0774521	0.0101208	-0.197373	0.0142994	1	0	0	-0.227691	0.00438457	1	0	0	-0.208562	0.0072189	1	0	0	-0.200864	0.00962654	1	0	0	-0.169405	0.0310137	1	0	0	-0.258162	0.000438456	1	0	0	-0.264053	0.000476205	1	0	-0.196336	0.0132599	1	0	0	-0.235522	0.00299297	1
N-methylpipecolate	N.methylpipecolate	Xenobiotics	Chemical	829	0.203551	0.0789731	0.0101244	0.154735	0.0574536	1	0	0	0.176438	0.0288742	1	0	0	0.201106	0.0109306	1	0	0	0.202965	0.0103897	1	0	0	0.220477	0.00609223	1	0	0	0.178487	0.0201492	1	0	0	0.172697	0.025254	1	0	0.21896	0.00659052	1	0	0	0.179461	0.0255526	1
N-acetylalanine	N.acetylalanine	Amino Acid	Alanine and Aspartate Metabolism	944	-0.189513	0.0736288	0.0102075	-0.198838	0.00923271	1	0	0	-0.215101	0.00441932	1	0	0	-0.193002	0.00885874	1	0	0	-0.190585	0.00974543	1	0	0	-0.161415	0.030635	1	0	0	-0.213328	0.00164459	1	0	0	-0.231094	0.000812595	1	0	-0.196777	0.00889701	1	0	0	-0.243901	0.00105851	1
N6,N6,N6-trimethyllysine	N6.N6.N6.trimethyllysine	Amino Acid	Lysine Metabolism	952	-0.178418	0.0693958	0.010291	-0.210025	0.00353594	1	0	0	-0.209051	0.0033797	1	0	0	-0.180452	0.0095055	1	0	0	-0.179086	0.0100305	1	0	0	-0.167828	0.017232	1	0	0	-0.205928	0.00180086	1	0	0	-0.228358	0.000415591	1	0	-0.213176	0.0025772	1	0	0	-0.210856	0.002834	1
tartarate	tartarate	Xenobiotics	Food Component/Plant	897	-0.192909	0.0755866	0.0108704	-0.201684	0.00991176	1	0	0	-0.202127	0.00923137	1	0	0	-0.193315	0.0108066	1	0	0	-0.193177	0.0108187	1	0	0	-0.165171	0.0312807	1	0	0	-0.193361	0.0107617	1	0	0	-0.19807	0.00900713	1	0	-0.180927	0.0190876	1	0	0	-0.19594	0.0111836	1
stearoylcarnitine	stearoylcarnitine	Lipid	Fatty Acid Metabolism(Acyl Carnitine)	955	-0.184873	0.0725356	0.0109676	-0.17488	0.0200019	1	0	0	-0.178383	0.0167958	1	0	0	-0.186639	0.0102758	1	0	0	-0.185038	0.0109421	1	0	0	-0.173144	0.0186501	1	0	0	-0.181962	0.0123794	1	0	0	-0.188962	0.00946807	1	0	-0.214004	0.00391076	1	0	0	-0.134562	0.0667594	1
trigonelline (N'-methylnicotinate)	trigonelline..N..methylnicotinate.	Cofactors and Vitamins	Nicotinate and Nicotinamide Metabolism	963	0.175017	0.0692093	0.011604	0.146201	0.0415862	1	0	0	0.160806	0.0238236	1	0	0	0.170993	0.0135592	1	0	0	0.174903	0.0117065	1	0	0	0.173606	0.0136224	1	0	0	0.164767	0.0168289	1	0	0	0.153362	0.0252188	1	0	0.16695	0.0182805	1	0	0	0.151065	0.0319211	1
X - 17299	X...17299	NA	NA	945	-0.179624	0.0712183	0.0118269	-0.180198	0.0146877	1	0	0	-0.193262	0.00829253	1	0	0	-0.180823	0.0113891	1	0	0	-0.180561	0.0113775	1	0	0	-0.153137	0.0338951	1	0	0	-0.204807	0.0018038	1	0	0	-0.216894	0.0013766	1	0	-0.176882	0.014972	1	0	0	-0.197715	0.00649156	1
propionylcarnitine	propionylcarnitine	Lipid	Fatty Acid Metabolism (also BCAA Metabolism)	951	0.181609	0.0726971	0.0126519	0.161757	0.0318335	1	0	0	0.156835	0.0357322	1	0	0	0.178376	0.0142972	1	0	0	0.182087	0.0124467	1	0	0	0.203102	0.00592075	1	0	0	0.168309	0.0195491	1	0	0	0.158401	0.0271484	1	0	0.134404	0.0690686	1	0	0	0.168772	0.022593	1
X - 18779	X...18779	NA	NA	957	-0.172013	0.0688942	0.0127001	-0.171316	0.016665	1	0	0	-0.172024	0.0152655	1	0	0	-0.170254	0.0136845	1	0	0	-0.17282	0.0122893	1	0	0	-0.177495	0.0112871	1	0	0	-0.165121	0.0164965	1	0	0	-0.167745	0.0152764	1	0	-0.16092	0.0222906	1	0	0	-0.165821	0.0182137	1
X - 24513	X...24513	NA	NA	943	-0.177807	0.0712287	0.0127199	-0.211774	0.00410768	1	0	0	-0.210977	0.00389732	1	0	0	-0.183778	0.00998457	1	0	0	-0.177819	0.0127668	1	0	0	-0.140272	0.0513842	1	0	0	-0.208642	0.00114326	1	0	0	-0.224946	0.000617474	1	0	-0.200144	0.00584847	1	0	0	-0.225311	0.00182406	1
X - 21470	X...21470	NA	NA	924	0.190385	0.076317	0.0127816	0.22153	0.00514878	1	0	0	0.18744	0.0168907	1	0	0	0.190735	0.0127174	1	0	0	0.189005	0.0131893	1	0	0	0.250421	0.00111635	1	0	0	0.182335	0.0162054	1	0	0	0.174438	0.0210503	1	0	0.158759	0.0417261	1	0	0	0.162407	0.0365742	1
quinolinate	quinolinate	Cofactors and Vitamins	Nicotinate and Nicotinamide Metabolism	942	-0.186878	0.0749392	0.0128114	-0.20365	0.00884028	1	0	0	-0.230938	0.00264477	1	0	0	-0.191148	0.0109451	1	0	0	-0.187986	0.0122571	1	0	0	-0.138513	0.0666797	1	0	0	-0.21298	0.00225839	1	0	0	-0.231594	0.000933781	1	0	-0.21423	0.00502927	1	0	0	-0.24066	0.00154025	1
linoleoylcarnitine*	linoleoylcarnitine.	Lipid	Fatty Acid Metabolism(Acyl Carnitine)	958	-0.17918	0.072081	0.0130953	-0.187275	0.0123457	1	0	0	-0.187505	0.0114301	1	0	0	-0.182458	0.0114971	1	0	0	-0.179555	0.0129475	1	0	0	-0.163237	0.0257528	1	0	0	-0.183358	0.0111382	1	0	0	-0.189534	0.00865768	1	0	-0.209134	0.00448796	1	0	0	-0.187416	0.0107781	1
octadecanedioate	octadecanedioate	Lipid	Fatty Acid, Dicarboxylate	949	0.186468	0.0750867	0.0131864	0.231932	0.00286607	1	0	0	0.192939	0.0125039	1	0	0	0.186481	0.0132726	1	0	0	0.184224	0.0142923	1	0	0	0.196644	0.00998387	1	0	0	0.192638	0.0104343	1	0	0	0.194194	0.0099651	1	0	0.160089	0.0368068	1	0	0	0.213903	0.00517702	1
N2,N5-diacetylornithine	N2.N5.diacetylornithine	Amino Acid	Urea cycle; Arginine and Proline Metabolism	855	0.177939	0.0717365	0.0133129	0.153469	0.0390529	1	0	0	0.151637	0.0395623	1	0	0	0.17444	0.0152823	1	0	0	0.178036	0.0132065	1	0	0	0.198118	0.006583	1	0	0	0.145465	0.0310589	1	0	0	0.138314	0.0405511	1	0	0.167528	0.021913	1	0	0	0.143194	0.0499646	1
X - 13866	X...13866	NA	NA	954	0.166784	0.0673046	0.0133823	0.163848	0.0188996	1	0	0	0.163848	0.0179545	1	0	0	0.168781	0.0123364	1	0	0	0.167207	0.0131871	1	0	0	0.178772	0.00891048	1	0	0	0.154082	0.0208696	1	0	0	0.149395	0.0257238	1	0	0.179156	0.00919475	1	0	0	0.157348	0.0217361	1
glycochenodeoxycholate sulfate	glycochenodeoxycholate.sulfate	Lipid	Primary Bile Acid Metabolism	951	-0.182845	0.0740016	0.0136546	-0.155293	0.0427965	1	0	0	-0.190736	0.0121944	1	0	0	-0.187884	0.0111421	1	0	0	-0.184387	0.0127955	1	0	0	-0.158014	0.0353109	1	0	0	-0.193468	0.00869236	1	0	0	-0.192739	0.00931582	1	0	-0.19284	0.0108217	1	0	0	-0.201223	0.00756367	1
X - 12127	X...12127	NA	NA	813	-0.19396	0.0788624	0.0141211	-0.212245	0.0100698	1	0	0	-0.199327	0.0139646	1	0	0	-0.197529	0.0124541	1	0	0	-0.194707	0.0138279	1	0	0	-0.17834	0.0256955	1	0	0	-0.214545	0.00608394	1	0	0	-0.218308	0.00516886	1	0	-0.210178	0.0090219	1	0	0	-0.247575	0.00192467	1
13-HODE + 9-HODE	X13.HODE...9.HODE	Lipid	Fatty Acid, Monohydroxy	960	0.181633	0.0741369	0.0144646	0.19913	0.00966659	1	0	0	0.18091	0.0176448	1	0	0	0.177219	0.0168292	1	0	0	0.180027	0.015197	1	0	0	0.151671	0.0435396	1	0	0	0.187149	0.0117463	1	0	0	0.182914	0.0140428	1	0	0.170586	0.0243584	1	0	0	0.196814	0.00919055	1
methionine sulfoxide	methionine.sulfoxide	Amino Acid	Methionine, Cysteine, SAM and Taurine Metabolism	958	0.171772	0.070652	0.0152298	0.13966	0.0564872	1	0	0	0.135222	0.0617524	1	0	0	0.168976	0.0169675	1	0	0	0.17199	0.0151579	1	0	0	0.169328	0.0184076	1	0	0	0.162163	0.0213817	1	0	0	0.156336	0.0265512	1	0	0.151672	0.035388	1	0	0	0.144255	0.0445444	1
X - 17653	X...17653	NA	NA	946	0.183544	0.0756635	0.0154612	0.137133	0.0796175	1	0	0	0.14629	0.0593369	1	0	0	0.183088	0.0158411	1	0	0	0.182906	0.0158586	1	0	0	0.184799	0.0163046	1	0	0	0.185875	0.0142686	1	0	0	0.181731	0.0167647	1	0	0.208809	0.00690031	1	0	0	0.172016	0.0255739	1
gamma-glutamylhistidine	gamma.glutamylhistidine	Peptide	Gamma-glutamyl Amino Acid	956	0.173309	0.0716793	0.015799	0.128729	0.0821705	1	0	0	0.161999	0.028059	1	0	0	0.170828	0.0173684	1	0	0	0.173183	0.0159343	1	0	0	0.184797	0.0111637	1	0	0	0.164589	0.0215166	1	0	0	0.160279	0.0253501	1	0	0.177188	0.0156107	1	0	0	0.168092	0.0214789	1
kynurenine	kynurenine	Amino Acid	Tryptophan Metabolism	960	-0.179575	0.0743729	0.0159422	-0.242062	0.00165447	1	0	0	-0.241228	0.00150282	1	0	0	-0.18119	0.0150928	1	0	0	-0.181676	0.0144995	1	0	0	-0.143506	0.0565777	1	0	0	-0.205111	0.00427962	1	0	0	-0.220084	0.00207904	1	0	-0.203614	0.00730556	1	0	0	-0.227741	0.00251609	1
oleoyl ethanolamide	oleoyl.ethanolamide	Lipid	Endocannabinoid	957	0.178796	0.0743457	0.0163647	0.194747	0.0116192	1	0	0	0.195124	0.0107128	1	0	0	0.181313	0.0149585	1	0	0	0.177962	0.0168529	1	0	0	0.183343	0.0152475	1	0	0	0.180906	0.0152553	1	0	0	0.173791	0.0198293	1	0	0.177741	0.0194414	1	0	0	0.184421	0.0149365	1
X - 21796	X...21796	NA	NA	942	0.129985	0.0542727	0.0168137	0.137323	0.0147573	1	0	0	0.131943	0.0178904	1	0	0	0.123597	0.0222939	1	0	0	0.129819	0.0169964	1	0	0	0.152243	0.00569764	1	0	0	0.118834	0.0271503	1	0	0	0.111835	0.0371556	1	0	0.103885	0.0601572	1	0	0	0.0951657	0.0837094	1
histidine	histidine	Amino Acid	Histidine Metabolism	962	-0.173255	0.0723663	0.0168504	-0.174271	0.0203794	1	0	0	-0.167015	0.0248268	1	0	0	-0.171375	0.0181375	1	0	0	-0.172774	0.017203	1	0	0	-0.1786	0.0151971	1	0	0	-0.167309	0.0208789	1	0	0	-0.171272	0.018406	1	0	-0.156365	0.0343833	1	0	0	-0.164715	0.0255213	1
X - 12170	X...12170	NA	NA	870	0.175326	0.0739854	0.0180182	0.133856	0.0793306	1	0	0	0.12962	0.0859087	1	0	0	0.170899	0.0211252	1	0	0	0.175349	0.0180351	1	0	0	0.181251	0.0158817	1	0	0	0.148965	0.031555	1	0	0	0.124026	0.0726304	1	0	0.160723	0.0333586	1	0	0	0.150369	0.0452396	1
adrenate (22:4n6)	adrenate..22.4n6.	Lipid	Polyunsaturated Fatty Acid (n3 and n6)	950	0.179494	0.075837	0.0181404	0.194873	0.0133264	1	0	0	0.18427	0.0181946	1	0	0	0.180123	0.0178533	1	0	0	0.178514	0.0187525	1	0	0	0.175241	0.0229952	1	0	0	0.187239	0.0135069	1	0	0	0.182117	0.0167848	1	0	0.180194	0.0201298	1	0	0	0.188723	0.0145683	1
2,3-dihydroxyisovalerate	X2.3.dihydroxyisovalerate	Xenobiotics	Food Component/Plant	932	0.173156	0.0737497	0.0190887	0.176123	0.0213496	1	0	0	0.132802	0.0787328	1	0	0	0.167373	0.0234423	1	0	0	0.172274	0.0194979	1	0	0	0.163083	0.0293828	1	0	0	0.15285	0.0333763	1	0	0	0.14469	0.0448466	1	0	0.149621	0.0472293	1	0	0	0.152246	0.0427241	1
cysteine	cysteine	Amino Acid	Methionine, Cysteine, SAM and Taurine Metabolism	957	-0.174997	0.074622	0.0192247	-0.181616	0.0192015	1	0	0	-0.195677	0.0107145	1	0	0	-0.175917	0.018692	1	0	0	-0.176188	0.018396	1	0	0	-0.165775	0.0287666	1	0	0	-0.175164	0.0192547	1	0	0	-0.184996	0.0133024	1	0	-0.202405	0.00789836	1	0	0	-0.173315	0.0226821	1
X - 13431	X...13431	NA	NA	957	-0.166737	0.0715274	0.0199556	-0.194272	0.00876925	1	0	0	-0.172693	0.0188993	1	0	0	-0.166683	0.0201129	1	0	0	-0.167894	0.0190633	1	0	0	-0.152041	0.036345	1	0	0	-0.180035	0.0110491	1	0	0	-0.190799	0.00713068	1	0	-0.184501	0.0115825	1	0	0	-0.181836	0.0126089	1
laurate (12:0)	laurate..12.0.	Lipid	Medium Chain Fatty Acid	949	0.175839	0.0755223	0.0201053	0.23378	0.0027946	1	0	0	0.200472	0.00984937	1	0	0	0.176682	0.0196414	1	0	0	0.175019	0.0206532	1	0	0	0.188906	0.0137889	1	0	0	0.17987	0.0174804	1	0	0	0.179957	0.0175845	1	0	0.182529	0.0182315	1	0	0	0.201534	0.00888582	1
gamma-glutamylalanine	gamma.glutamylalanine	Peptide	Gamma-glutamyl Amino Acid	955	0.157665	0.0680383	0.0206983	0.110598	0.115932	1	0	0	0.13217	0.0582969	1	0	0	0.15953	0.0193078	1	0	0	0.157823	0.0206434	1	0	0	0.158882	0.0215776	1	0	0	0.16393	0.0160551	1	0	0	0.166548	0.0145582	1	0	0.169783	0.0147079	1	0	0	0.173466	0.0123586	1
[truncated: 425 more rows]
[truncated: 25 more columns]

## Sheet: Supp_Table4
Supplementary Table 4: Resgression Results for Retinopathy
[truncated: 828 more rows]

[truncated: 10 more sheets: Supp_Table5, Supp_Table6, Supp_Table7, Supp_Table8, Supp_Table9, Supp_Table10, Supp_Table_11, Supp_Table12a, Supp_Table12b, References]
